# Supplementary material for: Structural verification of petromyzestrosterol by total syntheses of both C14-epimers of its 3-O-methyl derivative
Source: Royal Society of Chemistry journal article supplement (doi:10.1039/d2ob01047j), 2022-01-01
Supplement: d2ob01047j1.pdf [file d2ob01047j1.pdf]

**Structural verification of petromyzestrosterol  
by total syntheses of both C14-epimers of its 3-*O*-methyl derivative**

Atsuo Nakazaki,<sup>\*a,b</sup> Maho Kawai,<sup>a</sup> and Toshio Nishikawa<sup>a</sup>

<sup>a</sup>Graduate School of Bioagricultural Sciences, Nagoya University,  
Furo-cho, Chikusa, Nagoya 464-8601 (Japan).

<sup>b</sup>Faculty of Science and Engineering, Iwate University,  
Ueda, Morioka 020-8551 (Japan).

E-mail: nakazaki@iwate-u.ac.jp

**Contents:**

|                              |         |
|------------------------------|---------|
| General Techniques           | S2      |
| Experimental Section         | S3-S13  |
| NMR spectra of new compounds | S14-S53 |

## General Techniques

Infrared spectra (IR) were recorded on a JASCO FT/IR-4100 type A spectrophotometer and are reported in wavenumber ( $\text{cm}^{-1}$ ). Proton nuclear magnetic resonance ( $^1\text{H}$  NMR) spectra were recorded on a Bruker Avance-400 (400 MHz) spectrometer. Chemical shifts of all compounds are reported in ppm relative to the residual undeuterated solvent ( $\text{CDCl}_3$  as  $\delta = 7.26$ ,  $\text{CD}_3\text{OD}$  as  $\delta = 3.31$ , acetone- $d_6$  as  $\delta = 2.05$ ). Data were reported as follows: chemical shift, integration, multiplicity (s = singlet, d = doublet, t = triplet, q = quartet, m = multiplet, br = broadened), coupling constant(s), and assignment. Carbon nuclear magnetic resonance ( $^{13}\text{C}$  NMR) spectra were recorded on a Bruker Avance-400 (100 MHz) spectrometer. Chemical shifts of all compounds are reported in ppm relative to the solvent ( $\text{CDCl}_3$  as  $\delta = 77.16$ ,  $\text{CD}_3\text{OD}$  as  $\delta = 49.00$ , pyridine- $d_5$  as  $\delta = 123.87$ , acetone- $d_6$  as  $\delta = 29.84$ ). All NMR were measured at 300 K. High-resolution mass spectra (HRMS) were recorded on an Agilent technologies 6220 LC/TOF-MS spectrometer for ESI-MS, and reported in  $m/z$ . Melting points (mp) were recorded on a Yanaco MP-S3 melting point apparatus and are not corrected.

All reactions were monitored by thin layer chromatography (TLC) on 0.25 mm silica gel-coated glass plates 60F<sub>254</sub> (Merck, #1.05715.0001). Visualization was achieved by using UV light (254 nm) and appropriate reagent (ethanolic phosphomolybdic acid or *p*-anisaldehyde solution in  $\text{H}_2\text{SO}_4/\text{AcOH}/\text{EtOH}$ ), followed by heating. Silica gel 60N (neutral, particle size 0.063-0.200 mm, Kanto, #37565-84) was used for neutral silica gel open column chromatography. Silica gel 60N (spherical, neutral, particle size 0.04-0.05 mm, Kanto, #37563-84) was used for neutral silica gel flash column chromatography. Chromatorex-DIOL (particle size MB 100-75/200, Fuji Silysia Chemical Ltd. HU200602) was used for Chromatorex DIOL silica gel open column chromatography. Dry THF and  $\text{CH}_2\text{Cl}_2$  were purchased from Kanto Chemical Co., Inc. Dry DMF was distilled from  $\text{CaH}_2$ . Celite (Hyflo Super-Cel Celite) was purchased from Nacalai Tesque, Inc. Florisil was purchased from Kanto Chemical Co., Inc. All other commercially available reagents were used as received.

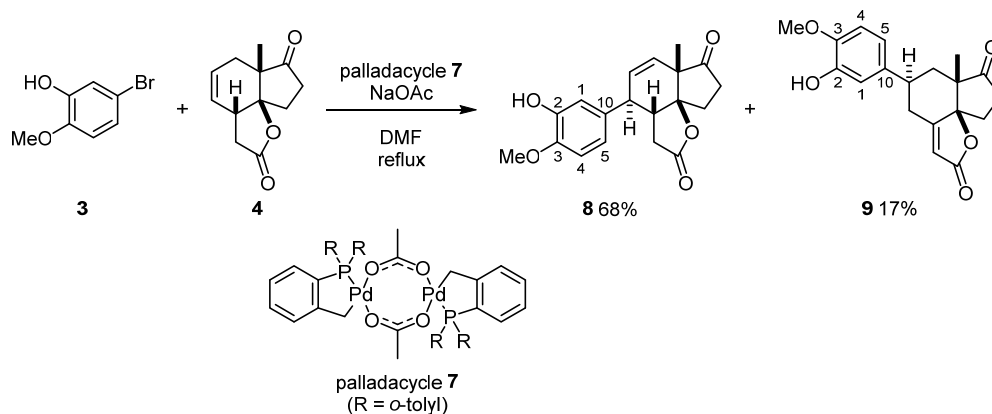

**Mizoroki-Heck reaction of 3 and 4:** To a solution of **4** (2.07 g, 10.0 mmol) and **3** (3.06 g, 15.1 mmol) in dry DMF (40.2 mL) was added NaOAc (2.15 g, 26.2 mmol) under Ar atmosphere at room temperature. And then to the resulting mixture was added Herrmann palladacycle **7** (286 mg, 0.305 mmol). After being heated to reflux, the resulting mixture was stirred for 2 h. The reaction mixture was cooled to room temperature and diluted with H<sub>2</sub>O. The reaction mixture was filtered through a pad of Florisil. The aqueous layer was extracted with CH<sub>2</sub>Cl<sub>2</sub> (3 x). The combined organic layer was washed with H<sub>2</sub>O (3 x) and brine, dried over Na<sub>2</sub>SO<sub>4</sub>, and concentrated under reduced pressure. The residue was purified by silica gel flash column chromatography (hexane:EtOAc = 1:1) to afford **8** (2.23 g, 68% yield) as a white solid and **9** (17% yield, calculated based on the amount of **8**) as a white solid. A part of the mixture was purified by preparative TLC for spectral analysis of **9**. Relative stereochemistry of **8** and **9** were determined by <sup>1</sup>H NMR and NOESY correlations (Figure 3).

**8:** IR (KBr)  $\nu_{\max}$  3445, 1784, 1743, 1511, 1281 cm<sup>-1</sup>. <sup>1</sup>H NMR (400 MHz, CDCl<sub>3</sub>)  $\delta$  1.23 (3H, s, CH<sub>3</sub>), 2.06 (1H, br dd, *J* = 13, 9 Hz, CH), 2.25-2.61 (6H, m, 6 x CH), 3.31 (1H, m, CHCH=CH), 3.89 (3H, s, CH<sub>3</sub>O), 5.46 (1H, dd, *J* = 10, 2 Hz, CH=CH), 5.68 (1H, br s, OH), 5.77 (1H, dd, *J* = 10, 2 Hz, CH=CH), 6.64 (1H, dd, *J* = 8, 2 Hz, aryl H-5), 6.73 (1H, d, *J* = 2 Hz, aryl H-1), 6.82 (1H, d, *J* = 8 Hz, aryl H-4). <sup>13</sup>C NMR (100 MHz, CDCl<sub>3</sub>)  $\delta$  15.7, 26.4, 32.3, 34.4, 44.3, 45.2, 55.6, 56.2, 92.6, 111.1, 113.6, 118.9, 130.2, 132.9, 134.1, 146.1, 146.2, 174.7, 215.5. <sup>1</sup>H NMR (400 MHz, acetone-*d*<sub>6</sub>)  $\delta$  1.18 (3H, s, CH<sub>3</sub>), 2.11-2.27 (2H, m, 2 x CH), 2.36-2.47 (3H, m, 3 x CH), 2.53-2.75 (2H, m, 2 x CH), 3.53 (1H, br d, *J* = 11 Hz, CHCH=CH), 3.84 (3H, s, CH<sub>3</sub>O), 5.38 (1H, dd, *J* = 9.5, 2 Hz, CH=CH), 5.78 (1H, dd, *J* = 9.5, 1.5 Hz, CH=CH), 6.70-6.77 (2H, m, aryl H-5, aryl H-1), 6.92 (1H, d, *J* = 8 Hz, aryl

H-4), 7.63 (1H, br s, OH).  $^{13}\text{C}$  NMR (100 MHz, acetone- $d_6$ )  $\delta$  15.9, 26.8, 32.4, 34.7, 44.5, 45.5, 56.0, 56.3, 92.9, 112.7, 115.2, 119.4, 130.3, 134.5, 135.4, 147.5, 147.7, 174.8, 215.8. HRMS-ESI ( $m/z$ ):  $[\text{M} + \text{Na}]^+$  calcd for  $\text{C}_{19}\text{H}_{20}\text{O}_5\text{Na}$ , 351.1203; found, 351.1203. mp 166-167 °C.

**9**: IR (KBr)  $\nu_{\text{max}}$  3420, 1741, 1513, 1443  $\text{cm}^{-1}$ .  $^1\text{H}$  NMR (400 MHz,  $\text{CDCl}_3$ )  $\delta$  0.70 (3H, s,  $\text{CH}_3$ ), 1.74 (1H, dd,  $J = 14, 7$  Hz,  $\text{CH}_3\text{CCH}_A\text{H}_B\text{CH}$ ), 2.08 (1H, dd,  $J = 14, 4$  Hz,  $\text{CH}_3\text{CCH}_A\text{H}_B\text{CH}$ ), 2.20 (1H, dd,  $J = 14, 10$  Hz,  $\text{CH}$ ), 2.45 (1H, ddd,  $J = 14, 13, 9$  Hz,  $\text{CH}$ ), 2.59 (1H, ddd,  $J = 19, 8, 1$  Hz,  $\text{CH}$ ), 2.74 (1H, ddd,  $J = 18.5, 12.5, 9.5$  Hz,  $\text{CH}$ ), 2.91 (1H, ddd,  $J = 18.5, 9, 2$  Hz,  $\text{CH}_A\text{H}_B\text{C}=\text{CH}$ ), 3.14-3.21 (2H, m,  $\text{CHCH}_A\text{H}_B\text{C}=\text{CH}$ ), 3.87 (3H, s,  $\text{CH}_3\text{O}$ ), 5.63 (1H, br s, OH), 6.03 (1H, d,  $J = 2$  Hz,  $\text{CH}=\text{C}$ ), 6.66 (1H, dd,  $J = 8, 2$  Hz, aryl H-5), 6.75 (1H, d,  $J = 8$  Hz, aryl H-4), 6.76 (1H, d,  $J = 2$  Hz, aryl H-1).  $^{13}\text{C}$  NMR (100 MHz,  $\text{CDCl}_3$ )  $\delta$  16.7, 30.5, 31.2, 35.3, 37.4, 39.0, 55.2, 56.1, 93.3, 110.7, 113.1, 116.6, 118.1, 136.4, 145.5, 145.9, 169.9, 171.8, 217.7. HRMS-ESI ( $m/z$ ):  $[\text{M} + \text{Na}]^+$  calcd for  $\text{C}_{19}\text{H}_{20}\text{O}_5\text{Na}$ , 351.1203; found, 351.1205. mp 65-67 °C.

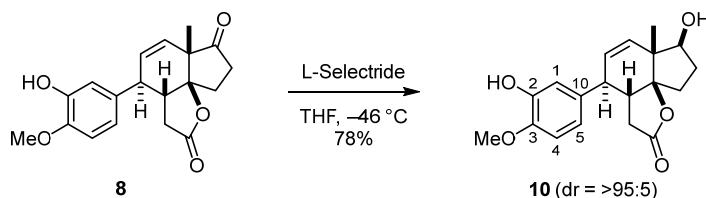

**Reduction of ketone 8:** To a solution of **8** (1.93 g, 5.88 mmol) in dry THF (39.0 mL) was added dropwise L-Selectride (1.0 M solution in THF, 23.0 mL, 23.0 mmol) at  $-46$  °C. After being stirred at  $-46$  °C for 20 min, to this solution was added dropwise L-Selectride (1.0 M solution in THF, 6.4 mL, 6.4 mmol) at  $-46$  °C. After being stirred at  $-46$  °C for 15 min, the reaction was quenched with a saturated aqueous solution of  $\text{NH}_4\text{Cl}$  and 1 N aqueous solution of HCl at  $-46$  °C. The aqueous layer was extracted with EtOAc (3 x). The combined organic layer was dried over  $\text{Na}_2\text{SO}_4$ , and concentrated under reduced pressure. The residue was purified by Chromatorex DIOL silica gel open column chromatography (hexane:EtOAc: $\text{CH}_2\text{Cl}_2 = 6:2:1$ ) to afford 17 $\beta$ -alcohol **10** (1.51 g, 78% yield, dr = >95:5 determined by  $^1\text{H}$  NMR analysis) as a white solid. Relative stereochemistry was

determined by NOESY correlations (Figure 4).

**17 $\beta$ -alcohol 10:** IR (KBr)  $\nu_{\max}$  3434, 1776, 1510, 1279  $\text{cm}^{-1}$ .  $^1\text{H}$  NMR (400 MHz,  $\text{CDCl}_3$ )  $\delta$  1.25 (3H, s,  $\text{CH}_3$ ), 1.84 (1H, m,  $\text{CH}$ ), 1.90-2.05 (2H, m, 2 x  $\text{CH}$ ), 2.23-2.46 (4H, m, 4 x  $\text{CH}$ ), 3.32 (1H, dt,  $J = 10, 2$  Hz,  $\text{CHCH}=\text{CH}$ ), 3.88 (3H, s,  $\text{CH}_3\text{O}$ ), 3.92 (1H, d,  $J = 3$  Hz,  $\text{CHOH}$ ), 5.49 (1H, dd,  $J = 10, 2$  Hz,  $\text{CH}=\text{CH}$ ), 5.60 (1H, dd,  $J = 10, 2$  Hz,  $\text{CH}=\text{CH}$ ), 5.71 (1H, br s,  $\text{OH}$ ), 6.63 (1H, dd,  $J = 8, 2$  Hz, aryl H-5), 6.72 (1H, d,  $J = 2$  Hz, aryl H-1), 6.80 (1H, d,  $J = 8$  Hz, aryl H-4).  $^{13}\text{C}$  NMR (100 MHz,  $\text{CDCl}_3$ )  $\delta$  15.2, 30.0, 31.7, 32.6, 44.9, 45.5, 52.1, 56.2, 80.0, 95.2, 111.0, 113.6, 118.9, 130.6, 134.9, 135.2, 145.9, 146.1, 175.5. HRMS-ESI ( $m/z$ ):  $[\text{M} + \text{Na}]^+$  calcd for  $\text{C}_{19}\text{H}_{22}\text{O}_5\text{Na}$ , 353.1359; found, 353.1356. mp 174-176  $^\circ\text{C}$ .

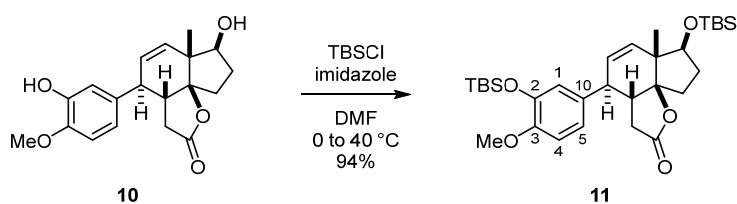

**Silylation of 10:** To a solution of **10** (953 mg, 2.88 mmol) in dry DMF (7.2 mL) were added imidazole (1.57 g, 23.1 mmol) and TBSCl (1.76 g, 11.5 mmol) at 0  $^\circ\text{C}$ . After being heated to 40  $^\circ\text{C}$ , the resulting mixture was stirred for 2 h. The reaction was quenched with a saturated aqueous solution of  $\text{NaHCO}_3$  and then 1 N aqueous solution of  $\text{HCl}$  at 0  $^\circ\text{C}$ . The aqueous layer was extracted with  $\text{EtOAc}$  (3 x). The combined organic layer was washed with  $\text{H}_2\text{O}$  (3 x), dried over  $\text{Na}_2\text{SO}_4$ , and concentrated under reduced pressure. The residue was purified by silica gel flash column chromatography (hexane: $\text{EtOAc} = 7:1$ ) to afford **11** (1.51 g, 94% yield) as a white solid.

**11:** IR (KBr)  $\nu_{\max}$  1782, 1509, 1253  $\text{cm}^{-1}$ .  $^1\text{H}$  NMR (400 MHz,  $\text{CDCl}_3$ )  $\delta$  0.06 (3H, s,  $\text{CH}_3\text{Si}$ ), 0.08 (3H, s,  $\text{CH}_3\text{Si}$ ), 0.14 (6H, s,  $(\text{CH}_3)_2\text{Si}$ ), 0.91 (9H, s,  $(\text{CH}_3)_3\text{C}$ ), 0.99 (9H, s,  $(\text{CH}_3)_3\text{C}$ ), 1.15 (3H, s,  $\text{CH}_3\text{CCH}$ ), 1.70 (1H, m,  $\text{CH}$ ), 1.85-1.97 (2H, m, 2 x  $\text{CH}$ ), 2.10-2.23 (2H, m, 2 x  $\text{CH}$ ), 2.25-2.38 (2H, m, 2 x  $\text{CH}$ ), 3.22 (1H, br d,  $J = 9$  Hz,  $\text{CHCH}=\text{CH}$ ), 3.78 (3H, s,  $\text{CH}_3\text{O}$ ), 3.90 (1H, dd,  $J = 4, 3$  Hz,  $\text{CHOSi}$ ), 5.46 (1H, dd,  $J = 10, 2$  Hz,  $\text{CH}=\text{CH}$ ), 5.58 (1H, dd,  $J = 10, 1$  Hz,  $\text{CH}=\text{CH}$ ), 6.62 (1H, d,  $J =$

2 Hz, aryl H-1), 6.68 (1H, dd,  $J = 8, 2$  Hz, aryl H-5), 6.80 (1H, d,  $J = 8$  Hz, aryl H-4).  $^{13}\text{C}$  NMR (100 MHz,  $\text{CDCl}_3$ )  $\delta$  -4.8, -4.5, -4.4, 15.7, 18.2, 18.6, 25.8, 25.9, 30.2, 32.4, 32.7, 44.1, 46.5, 52.3, 55.7, 79.4, 95.1, 112.5, 120.2, 120.3, 130.2, 134.6, 136.3, 145.3, 150.1, 176.3. HRMS-ESI ( $m/z$ ):  $[\text{M} + \text{Na}]^+$  calcd for  $\text{C}_{31}\text{H}_{50}\text{O}_5\text{Si}_2\text{Na}$ , 581.3089; found, 581.3086. mp 104-105 °C.

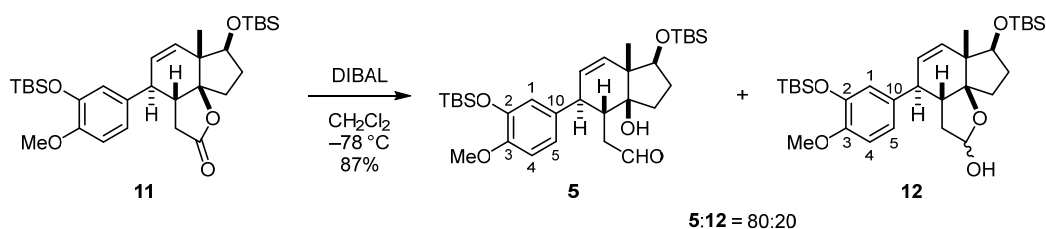

**Reduction of lactone 11:** To a solution of **11** (3.47 g, 6.21 mmol) in dry  $\text{CH}_2\text{Cl}_2$  (62.0 mL) was added dropwise DIBAL (1.0 M solution in hexane, 14.0 mL, 14.0 mmol) at  $-78$  °C. After being stirred at  $-78$  °C for 15 min, the reaction was quenched with 1 N aqueous solution of HCl at  $-78$  °C. The aqueous layer was extracted with  $\text{CH}_2\text{Cl}_2$  (3 x). The combined organic layer was washed with  $\text{H}_2\text{O}$ , dried over  $\text{Na}_2\text{SO}_4$ , and concentrated under reduced pressure. The residue was purified by silica gel flash column chromatography (hexane:EtOAc: $\text{CH}_2\text{Cl}_2 = 8:1:1$ ) to afford a mixture of hydroxyaldehyde **5** and lactol **12** (3.02 g, 87% yield, **5:12** = 80:20 determined by  $^1\text{H}$  NMR analysis) as a white solid.

**Hydroxyaldehyde 5 and lactol 12:** IR (KBr)  $\nu_{\text{max}}$  3409, 1725, 1509  $\text{cm}^{-1}$ .  $^1\text{H}$  NMR (400 MHz,  $\text{CDCl}_3$ )  $\delta$  0.07 (1.2H, br s,  $(\text{CH}_3)_2\text{Si}$ ), 0.10 (4.8H, s,  $(\text{CH}_3)_2\text{Si}$ ), 0.14 (3H, s,  $\text{CH}_3\text{Si}$ ), 0.15 (3H, s,  $\text{CH}_3\text{Si}$ ), 0.90 (7.2H, s,  $(\text{CH}_3)_3\text{C}$ ), 0.91 (1.8H, s,  $(\text{CH}_3)_3\text{C}$ ), 0.99 (9H, s,  $(\text{CH}_3)_3\text{C}$ ), 1.22 (2.4H, s,  $\text{CH}_3\text{CCH}$ ), 1.25 (0.6H, br s), 1.55-1.92 (4.0H, m), 2.10 (1H, m), 2.23 (0.8H, dd,  $J = 15, 3$  Hz), 2.37-2.53 (1.6H, m), 2.97 (0.8H, br d,  $J = 10$  Hz,  $\text{CHCH}=\text{CH}$ ), 3.07 (0.2H, m), 3.70 (0.8H, s, OH), 3.78 (3H, s,  $\text{CH}_3\text{O}$ ), 3.86 (0.2H, m,  $\text{CHOSi}$ ), 3.91 (0.8H, d,  $J = 3.5$  Hz,  $\text{CHOSi}$ ), 5.32 (0.8H, dd,  $J = 10, 2$  Hz,  $\text{CH}=\text{CH}$ ), 5.41 (1H, dd,  $J = 10, 1$  Hz,  $\text{CH}=\text{CH}$ ), 5.46 (0.2H, m), 6.63-6.73 (2H, m, aryl), 6.77 (1H, m, aryl), 9.32 (0.8H, d,  $J = 3$  Hz, CHO).  $^{13}\text{C}$  NMR (100 MHz,  $\text{CDCl}_3$ )  $\delta$  -4.9, -4.6, -4.4, 17.6, 18.1, 18.6, 25.87, 25.94, 31.5, 33.0, 42.0, 44.1, 47.8, 51.7, 55.7, 82.6, 82.8, 112.2, 121.2, 122.0, 130.1, 132.9, 135.4, 145.3, 150.2, 203.0 (Signals of  $^{13}\text{C}$  NMR are only shown for the major hydroxyaldehyde **5**). HRMS-ESI

(*m/z*): [M + Na]<sup>+</sup> calcd for C<sub>31</sub>H<sub>52</sub>O<sub>5</sub>Si<sub>2</sub>Na, 583.3245; found, 583.3240. mp 112-113 °C.

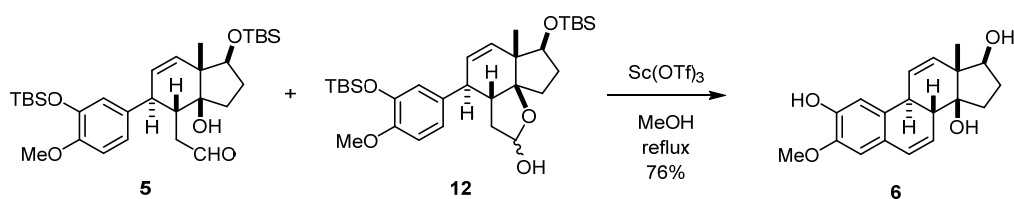

**Friedel-Crafts-type cyclodehydration of 5 and 12:** To a solution of a mixture of **5** and **12** (492 mg, 0.874 mmol) in MeOH (14.8 mL) was added Sc(OTf)<sub>3</sub> (87.7 mg, 0.178 mmol) at room temperature. After being heated to reflux, the resulting mixture was stirred for 4 h. The reaction was quenched with a saturated aqueous solution of NaHCO<sub>3</sub> and then 1 N aqueous solution of HCl at 0 °C. The aqueous layer was extracted with EtOAc (3 x). The combined organic layer was dried over Na<sub>2</sub>SO<sub>4</sub>, and concentrated under reduced pressure. The residue was purified by Chromatorex DIOL silica gel open column chromatography (hexane:EtOAc = 2:1) to afford tetracycle **6** (209 mg, 76% yield) as a white solid.

**Tetracycle 6:** IR (KBr)  $\nu_{\max}$  3464, 1569, 1507, 1298 cm<sup>-1</sup>. <sup>1</sup>H NMR (400 MHz, CD<sub>3</sub>OD)  $\delta$  1.10 (3H, s, CH<sub>3</sub>), 1.76 (1H, m, CH), 1.80-1.90 (2H, m, 2 x CH), 2.17 (1H, m, CH), 2.32 (1H, dt, *J* = 15, 2.5 Hz, CHCH=CH), 3.19 (1H, br d, *J* = 15 Hz, CHCH=CH), 3.82-3.87 (4H, m, 4 x CH), 5.51 (1H, dd, *J* = 10, 2.5 Hz, CH=CH), 6.10 (1H, d, *J* = 10 Hz, CH=CH), 6.24 (1H, dd, *J* = 10, 2.5 Hz, CH=CH), 6.53 (1H, dd, *J* = 10, 2.5 Hz, CH=CH), 6.75 (1H, s, aryl), 6.83 (1H, s, aryl). <sup>13</sup>C NMR (100 MHz, pyridine-*d*<sub>5</sub>)  $\delta$  18.4, 32.9, 34.2, 39.9, 42.8, 53.3, 56.5, 80.6, 82.3, 112.0, 113.0, 124.6, 127.2, 129.06, 129.13, 132.0, 137.1, 147.1, 147.9. HRMS-ESI (*m/z*): [M + Na]<sup>+</sup> calcd for C<sub>19</sub>H<sub>22</sub>O<sub>4</sub>Na, 337.1410; found, 337.1405. mp 226-228 °C.

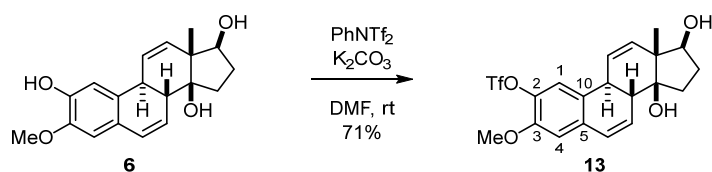

**Sulfonylation of 6:** To a solution of **6** (160 mg, 0.510 mmol) in dry DMF (5.6 mL) were added K<sub>2</sub>CO<sub>3</sub>

(89.2 mg, 0.645 mmol) and PhNTf<sub>2</sub> (225 mg, 0.629 mmol) at room temperature. The reaction mixture was stirred at room temperature for 18.5 h. The reaction was quenched with 1 N aqueous solution of HCl. The aqueous layer was extracted with EtOAc (4 x). The combined organic layer was washed with H<sub>2</sub>O (3 x) and brine, dried over Na<sub>2</sub>SO<sub>4</sub>, and concentrated under reduced pressure. The residue was purified by silica gel flash column chromatography (hexane:EtOAc = 2:1) to afford **13** (162 mg, 71% yield) as a light brown solid.

**13**: IR (KBr)  $\nu_{\text{max}}$  3421, 1497, 1421, 1211 cm<sup>-1</sup>. <sup>1</sup>H NMR (400 MHz, CDCl<sub>3</sub>)  $\delta$  1.17 (3H, s, CH<sub>3</sub>), 1.79-2.00 (3H, m, 3 x CH), 2.11 (1H, d, *J* = 4 Hz, CHOH), 2.26 (1H, ddd, *J* = 15, 10, 4 Hz, CH<sub>A</sub>H<sub>B</sub>COH), 2.43 (1H, dt, *J* = 15, 2 Hz, COHCHCH=CH), 2.72 (1H, s, COH), 3.31 (1H, br d, *J* = 15 Hz, CHCH=CH), 3.91 (3H, s, CH<sub>3</sub>O), 3.96 (1H, br s, CHOH), 5.50 (1H, dd, *J* = 10, 3 Hz, CH<sub>3</sub>CCH=CH), 6.02 (1H, dd, *J* = 10, 1 Hz, CH<sub>3</sub>CCH=CH), 6.54 (1H, dd, *J* = 10, 2 Hz, COHCHCH=CH), 6.58 (1H, dd, *J* = 10, 2 Hz, COHCHCH=CH), 6.81 (1H, s, aryl H-4), 7.11 (1H, s, aryl H-1). <sup>13</sup>C NMR (100 MHz, CDCl<sub>3</sub>)  $\delta$  16.8, 31.9, 33.1, 38.7, 41.0, 52.8, 56.4, 80.9, 82.0, 111.4, 117.4, 118.9 (q, *J* = 319 Hz), 123.4, 127.9, 130.2, 132.8, 135.5, 135.7, 137.2, 149.8. HRMS-ESI (*m/z*): [M + Na]<sup>+</sup> calcd for C<sub>20</sub>H<sub>21</sub>F<sub>3</sub>O<sub>6</sub>SNa, 469.0903; found, 469.0904. mp 65-66 °C.

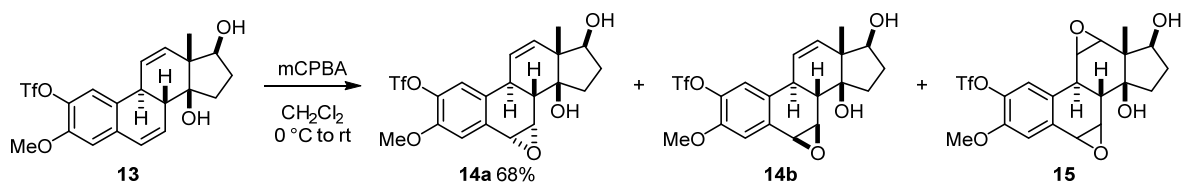

**Epoxidation of 13:** To a solution of **13** (435 mg, 0.974 mmol) in CH<sub>2</sub>Cl<sub>2</sub> (8.9 mL) was added mCPBA (171 mg, 0.991 mmol) at 0 °C. The reaction mixture was stirred at room temperature for 6.5 h. The reaction was diluted with CH<sub>2</sub>Cl<sub>2</sub>. The resulting mixture was washed with 10% aqueous solution of Na<sub>2</sub>SO<sub>3</sub> and a saturated aqueous solution of NaHCO<sub>3</sub> and H<sub>2</sub>O, dried over Na<sub>2</sub>SO<sub>4</sub>, and concentrated under reduced pressure to afford a crude mixture of diastereomers **14a** and **14b** and diepoxide **15** (**14a**:**14b**:**15** = 80:11:9 determined by <sup>1</sup>H NMR analysis). The residue was purified by silica gel flash column chromatography (hexane:EtOAc = 1:1) to afford  $\alpha$ -epoxide **14a** (308 mg, 68% yield) as a light



brown solid and a mixture of  $\beta$ -epoxide **14b** and diepoxide **15** (**14b:15** = 49:51 determined by  $^1\text{H}$  NMR analysis) as a solid. A part of the mixture was purified by silica gel flash column chromatography ( $\text{CH}_2\text{Cl}_2:\text{EtOAc} = 1:2$ ) and preparative TLC for spectral analysis of **14b** and **15**. The newly generated stereogenic centers in **14a** were determined by NOESY correlation of **2b** (Figure 5).

$\alpha$ -epoxide **14a**: IR (KBr)  $\nu_{\text{max}}$  3457, 1508, 1422, 1214  $\text{cm}^{-1}$ .  $^1\text{H}$  NMR (400 MHz,  $\text{CDCl}_3$ )  $\delta$  1.16 (3H, s,  $\text{CH}_3$ ), 1.79-1.86 (2H, m, 2 x  $\text{CH}$ ), 1.89 (1H, d,  $J = 12$  Hz,  $\text{CHCOH}$ ), 2.06 (1H, dt,  $J = 15, 9$  Hz,  $\text{CH}$ ), 2.18 (1H, br s,  $\text{OH}$ ), 2.34 (1H, ddd,  $J = 15, 9, 5$  Hz,  $\text{CH}$ ), 3.17 (1H, br s,  $\text{OH}$ ), 3.45 (1H, br d,  $J = 12$  Hz,  $\text{CHCH}=\text{CH}$ ), 3.89 (1H, d,  $J = 4$  Hz,  $\text{CHCH}$ ), 3.94 (3H, s,  $\text{CH}_3\text{O}$ ), 3.99 (1H, br s,  $\text{CHOH}$ ), 4.17 (1H, d,  $J = 4$  Hz,  $\text{CHCH}$ ), 5.44 (1H, dd,  $J = 10, 3$  Hz,  $\text{CH}=\text{CH}$ ), 6.01 (1H, d,  $J = 10$  Hz,  $\text{CH}=\text{CH}$ ), 7.12 (1H, s, aryl), 7.14 (1H, s, aryl).  $^{13}\text{C}$  NMR (100 MHz,  $\text{CDCl}_3$ )  $\delta$  16.7, 32.0, 32.8, 33.2, 40.2, 52.6, 53.0, 53.5, 56.6, 80.8, 82.0, 115.1, 118.2, 118.8 (q,  $J = 319$  Hz), 123.6, 131.9, 133.7, 134.7, 138.4, 149.6. HRMS-ESI ( $m/z$ ):  $[\text{M} + \text{Na}]^+$  calcd for  $\text{C}_{20}\text{H}_{21}\text{F}_3\text{O}_7\text{SNa}$ , 485.0852; found, 485.0862. mp 74-76  $^\circ\text{C}$ .

$\beta$ -epoxide **14b**: IR (KBr)  $\nu_{\text{max}}$  3055, 1422, 1265  $\text{cm}^{-1}$ .  $^1\text{H}$  NMR (400 MHz,  $\text{CDCl}_3$ )  $\delta$  1.15 (3H, s,  $\text{CH}_3$ ), 1.81-1.93 (3H, m, 3 x  $\text{CH}$ ), 2.12 (1H, m,  $\text{CH}$ ), 2.19-2.28 (2H, m, 2 x  $\text{CH}$ ), 2.81 (1H, s,  $\text{OH}$ ), 3.54 (1H, br d,  $J = 12$  Hz,  $\text{CHCH}=\text{CH}$ ), 3.79 (1H, d,  $J = 4$  Hz,  $\text{CH}$ ), 3.86 (1H, t,  $J = 4$  Hz,  $\text{CH}$ ), 3.94 (3H, s,  $\text{CH}_3\text{O}$ ), 3.96 (1H, m,  $\text{CH}$ ), 5.52 (1H, dd,  $J = 10, 3$  Hz,  $\text{CH}=\text{CH}$ ), 5.92 (1H, dd,  $J = 10, 2$  Hz,  $\text{CH}=\text{CH}$ ), 7.06 (1H, s, aryl), 7.29 (1H, s, aryl).  $^{13}\text{C}$  NMR (100 MHz,  $\text{CDCl}_3$ )  $\delta$  16.5, 31.9, 32.8, 37.7, 46.5, 48.8, 52.8, 55.0, 56.5, 80.8, 82.0, 116.4, 118.6, 123.0, 133.7, 134.0, 136.4, 138.7, 150.1. ( $\text{CF}_3$  group is missing due to weak signal). HRMS-ESI ( $m/z$ ):  $[\text{M} + \text{Na}]^+$  calcd for  $\text{C}_{20}\text{H}_{21}\text{F}_3\text{O}_7\text{SNa}$ , 485.0852; found, 485.0864. mp 125-126  $^\circ\text{C}$ .

Diepoxide **15**: IR (KBr)  $\nu_{\text{max}}$  3459, 1510, 1422, 1222  $\text{cm}^{-1}$ .  $^1\text{H}$  NMR (400 MHz,  $\text{CDCl}_3$ )  $\delta$  1.23 (3H, s,  $\text{CH}_3$ ), 1.84 (1H, d,  $J = 12$  Hz), 1.95-2.10 (3H, m), 2.40 (1H, m), 2.77 (1H, d,  $J = 1$  Hz), 2.81 (1H, d,  $J = 4$  Hz), 3.19 (1H, d,  $J = 12$  Hz,  $\text{ArCH}$ ), 3.65 (1H, d,  $J = 4$  Hz), 3.86 (1H, d,  $J = 4$  Hz), 3.95 (3H, s,  $\text{CH}_3\text{O}$ ), 4.06 (1H, m), 4.09 (1H, d,  $J = 4$  Hz), 7.13 (1H, s, aryl), 7.27 (1H, s, aryl).  $^{13}\text{C}$  NMR (100 MHz,  $\text{CDCl}_3$ )  $\delta$  12.2, 32.0, 33.2, 33.7, 36.6, 49.2, 52.1, 53.5, 53.9, 56.6, 58.4, 80.9, 81.2, 114.8, 119.0,

130.3, 134.1, 138.5, 150.1 (CF<sub>3</sub> group is missing due to weak signal). HRMS-ESI (*m/z*): [M + Na]<sup>+</sup> calcd for C<sub>20</sub>H<sub>21</sub>F<sub>3</sub>O<sub>8</sub>SNa, 501.0801; found, 501.0800.

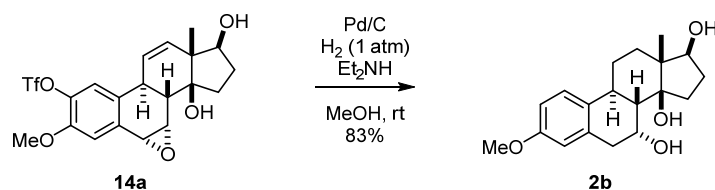

**Hydrogenolysis of 14a:** To a solution of **14a** (283 mg, 0.612 mmol) in MeOH (6.1 mL) were added Et<sub>2</sub>NH (0.080 ml, 0.77 mmol) and Pd/C (5%, 143 mg) at room temperature. The reaction mixture was stirred under an atmosphere of hydrogen (1 atm) at room temperature for 17 h. The reaction mixture was filtered through a pad of Celite, and the filtrate was concentrated under reduced pressure. The residue was purified by Chromatorex DIOL silica gel open column chromatography (hexane:EtOAc = 2:1) to afford **2b** (162 g, 83% yield) as a white solid.

**2b:** IR (KBr)  $\nu_{\max}$  3406, 1608, 1501, 1235 cm<sup>-1</sup>. <sup>1</sup>H NMR (400 MHz, CD<sub>3</sub>OD)  $\delta$  1.07 (3H, s, CH<sub>3</sub>), 1.30 (1H, m, CH), 1.35-1.49 (2H, m, 2 x CH), 1.63 (1H, d, *J* = 12 Hz, CHCOH), 1.80 (1H, m, CH), 1.97 (1H, ddd, *J* = 14, 10, 3 Hz, CH), 2.20-2.41 (3H, m, 3 x CH), 2.80-2.90 (2H, m, 2 x CH), 3.03 (1H, d, *J* = 17 Hz, CH<sub>A</sub>H<sub>B</sub>CHOHCH), 3.66 (1H, d, *J* = 6 Hz, CHOHCCH<sub>3</sub>), 3.74 (3H, s, CH<sub>3</sub>O), 4.54 (1H, br s, CHOHCH), 6.62 (1H, d, *J* = 2 Hz, aryl H-4), 6.70 (1H, dd, *J* = 9, 2 Hz, aryl H-2), 7.22 (1H, d, *J* = 9 Hz, aryl H-1). <sup>13</sup>C NMR (100 MHz, CD<sub>3</sub>OD)  $\delta$  14.2, 28.1, 32.1, 33.5, 34.0, 35.2, 41.1, 48.3, 50.8, 55.5, 63.8, 82.8, 85.3, 113.0, 115.4, 128.1, 133.1, 136.1, 159.1. HRMS-ESI (*m/z*): [M + Na]<sup>+</sup> calcd for C<sub>19</sub>H<sub>26</sub>O<sub>4</sub>Na, 341.1723; found, 341.1728. mp 128-129 °C.

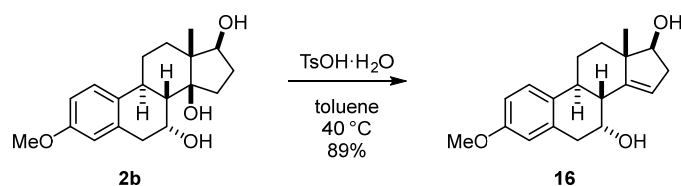

**Dehydration of 2b:** To a solution of **2b** (49.6 mg, 0.156 mmol) in toluene (6.4 mL) was added TsOH·H<sub>2</sub>O (176 mg, 0.927 mmol) at room temperature. After being heated to 40 °C, the resulting mixture

was stirred for 4.5 h. The reaction mixture was cooled to room temperature and diluted with H<sub>2</sub>O. The aqueous layer was extracted with EtOAc (3 x). The combined organic layer was washed with H<sub>2</sub>O (2 x), dried over Na<sub>2</sub>SO<sub>4</sub>, and concentrated under reduced pressure. The residue was purified by silica gel flash column chromatography (hexane:EtOAc = 1:1) to afford alkene **16** (41.6 mg, 89% yield) as a white solid.

**16**: IR (KBr)  $\nu_{\max}$  3396, 1610, 1502, 1254, 1070 cm<sup>-1</sup>. <sup>1</sup>H NMR (400 MHz, CDCl<sub>3</sub>)  $\delta$  1.01 (3H, s, CH<sub>3</sub>), 1.45 (1H, td, *J* = 14, 3.5 Hz, CH), 1.61 (1H, m, CH), 2.04 (1H, dt, *J* = 13, 3 Hz, CH), 2.21-2.31 (2H, m, 2 x CH), 2.46 (1H, dddd, *J* = 13, 3, 3, 3 Hz, CH), 2.59-2.71 (2H, m, 2 x CH), 2.97 (1H, d, *J* = 18 Hz, CH<sub>A</sub>H<sub>B</sub>CHOHCH), 3.15 (1H, dd, *J* = 18, 3 Hz, CH<sub>A</sub>H<sub>B</sub>CHOHCH), 3.78 (3H, s, CH<sub>3</sub>O), 4.13 (1H, m, CHOHCCH<sub>3</sub>), 4.54 (1H, br s, CHOHCH), 5.39 (1H, d, *J* = 2 Hz, CH=C), 6.66 (1H, d, *J* = 2 Hz, aryl H-4), 6.76 (1H, dd, *J* = 9, 2 Hz, aryl H-2), 7.28 (1H, d, *J* = 9 Hz, aryl H-1). <sup>13</sup>C NMR (100 MHz, CDCl<sub>3</sub>)  $\delta$  16.0, 27.0, 36.1, 37.9, 38.4, 39.1, 43.3, 47.4, 55.4, 65.1, 83.4, 112.4, 114.6, 116.0, 127.0, 130.9, 134.6, 149.0, 158.0. HRMS-ESI (*m/z*): [M + Na]<sup>+</sup> calcd for C<sub>19</sub>H<sub>24</sub>O<sub>3</sub>Na, 323.1618; found, 323.1622. mp 161-163 °C.

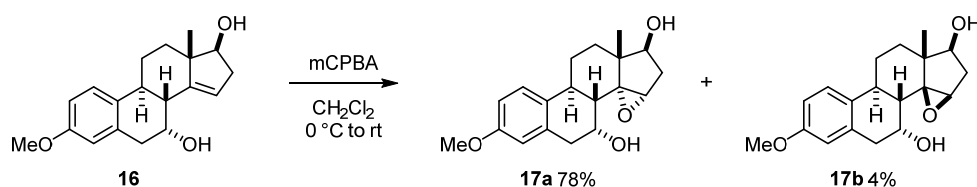

**Epoxidation of 16**: To a solution of **16** (29.8 mg, 0.0992 mmol) in CH<sub>2</sub>Cl<sub>2</sub> (0.90 mL) was added mCPBA (21.5 mg, 0.125 mmol) at 0 °C. The reaction mixture was stirred at room temperature for 10 min. The reaction was diluted with EtOAc. The resulting mixture was washed with 10% aqueous solution of Na<sub>2</sub>SO<sub>3</sub> (2 x) and a saturated aqueous solution of NaHCO<sub>3</sub> and H<sub>2</sub>O (2 x) and brine, dried over Na<sub>2</sub>SO<sub>4</sub>, and concentrated under reduced pressure to afford a crude mixture of diastereomers (**17a**:**17b** = 95:5 determined by <sup>1</sup>H NMR analysis). The residue was purified by silica gel flash column chromatography (hexane:EtOAc = 1:1) to afford  $\alpha$ -epoxide **17a** (24.4 mg, 78% yield) as a white solid and  $\beta$ -epoxide **17b** (1.2 mg, 4% yield) as a white solid. Relative stereochemistry of **17a**

was determined by comparison of  $^1\text{H}$  NMR spectra of **2b** and **1b** after reduction with  $\text{LiAlH}_4$ .

$\alpha$ -epoxide **17a**: IR (KBr)  $\nu_{\text{max}}$  3430, 1610, 1504, 1258  $\text{cm}^{-1}$ .  $^1\text{H}$  NMR (400 MHz,  $\text{CDCl}_3$ )  $\delta$  0.95 (3H, s,  $\text{CH}_3$ ), 1.59-1.75 (4H, m, 4 x CH), 1.93 (1H, m,  $\text{CH}_3\text{CCH}_A\text{H}_B$ ), 2.27 (1H, d,  $J = 12$  Hz,  $\text{CHOHCHCH}$ ), 2.45 (1H, dd,  $J = 14, 7$  Hz,  $\text{CH}_A\text{H}_B\text{CHOHCCH}_3$ ), 2.52 (1H, m,  $\text{CH}_3\text{CCH}_2\text{CH}_A\text{H}_B$ ), 2.87 (1H, d,  $J = 18$  Hz,  $\text{CH}_A\text{H}_B\text{CHOHCH}$ ), 3.01 (1H, d,  $J = 18$  Hz,  $\text{CH}_A\text{H}_B\text{CHOHCH}$ ), 3.10 (1H, td,  $J = 12, 3$  Hz,  $\text{CHCHCHOH}$ ), 3.57 (1H, d,  $J = 1$  Hz, OH), 3.73 (1H, m,  $\text{CHOHCCH}_3$ ), 3.77 (3H, s,  $\text{CH}_3\text{O}$ ), 3.94 (1H, s,  $\text{CHCH}_2\text{CHOH}$ ), 4.10 (1H, br s,  $\text{CHOHCH}$ ), 6.64 (1H, d,  $J = 2$  Hz, aryl H-4), 6.76 (1H, dd,  $J = 9, 2$  Hz, aryl H-2), 7.28 (1H, d,  $J = 9$  Hz, aryl H-1).  $^{13}\text{C}$  NMR (100 MHz,  $\text{CDCl}_3$ )  $\delta$  14.3, 26.0, 32.9, 33.7, 34.3, 37.1, 38.4, 41.9, 55.4, 59.2, 65.1, 74.8, 75.9, 112.3, 114.6, 126.8, 130.7, 134.8, 158.0. HRMS-ESI ( $m/z$ ):  $[\text{M} + \text{Na}]^+$  calcd for  $\text{C}_{19}\text{H}_{24}\text{O}_4\text{Na}$ , 339.1567; found, 339.1558. mp 185-187  $^\circ\text{C}$ .

$\beta$ -epoxide **17b**: IR (KBr)  $\nu_{\text{max}}$  3423, 1609, 1500, 1235  $\text{cm}^{-1}$ .  $^1\text{H}$  NMR (400 MHz,  $\text{CDCl}_3$ )  $\delta$  1.14 (3H, s,  $\text{CH}_3$ ), 1.25 (1H, m), 1.32 (1H, m), 1.60-1.70 (2H, m), 2.01-2.14 (3H, m), 2.27 (1H, dd,  $J = 16, 6$  Hz, CH), 2.42 (1H, m, CH), 2.78-2.91 (2H, m, 2 x CH), 3.12 (1H, d,  $J = 17$  Hz,  $\text{CH}_A\text{H}_B\text{CHOHCH}$ ), 3.48 (1H, dd,  $J = 12, 6$  Hz, CH), 3.78 (3H, s,  $\text{CH}_3\text{O}$ ), 4.06 (1H, s, CH), 4.25 (1H, br s, CH), 6.64 (1H, d,  $J = 2$  Hz, aryl H-4), 6.78 (1H, dd,  $J = 8, 2$  Hz, aryl H-2), 7.25 (1H, d,  $J = 8$  Hz, aryl H-1).  $^{13}\text{C}$  NMR (100 MHz,  $\text{CDCl}_3$ )  $\delta$  13.6, 26.8, 34.6, 35.9, 36.3, 39.8, 40.2, 46.1, 55.4, 62.4, 62.8, 72.7, 112.7, 115.0, 127.1, 130.8, 134.1, 158.2. (one  $\text{sp}^3$  carbon is missing due to overlap with  $\text{CDCl}_3$ ). HRMS-ESI ( $m/z$ ):  $[\text{M} + \text{Na}]^+$  calcd for  $\text{C}_{19}\text{H}_{24}\text{O}_4\text{Na}$ , 339.1567; found, 339.1574. mp 177-180  $^\circ\text{C}$ .

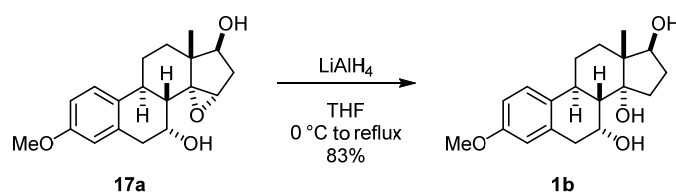

**Reduction of 17a:** To a solution of **17a** (109 mg, 0.344 mmol) in dry THF (4.7 mL) were added  $\text{LiAlH}_4$  (109 mg, 2.88 mmol) and dry THF (3.0 mL) at 0  $^\circ\text{C}$ . After being heated to reflux, the resulting mixture was stirred for 5 h. The reaction was quenched with 1 N aqueous solution of HCl at 0  $^\circ\text{C}$ . The aqueous layer was extracted with EtOAc (3 x). The combined organic layer was

washed with H<sub>2</sub>O (2 x), dried over Na<sub>2</sub>SO<sub>4</sub>, and concentrated under reduced pressure. The residue was purified by silica gel flash column chromatography (CH<sub>2</sub>Cl<sub>2</sub>:MeOH = 20:1) to afford **1b** (90.9 mg, 83% yield) as a white solid.

**1b**: IR (KBr)  $\nu_{\max}$  3367, 1501, 1056 cm<sup>-1</sup>. <sup>1</sup>H NMR (400 MHz, CD<sub>3</sub>OD)  $\delta$  0.86 (3H, s, CH<sub>3</sub>), 1.45-1.63 (3H, m, 3 x CH), 1.73 (1H, m, CH<sub>A</sub>H<sub>B</sub>COH), 1.78 (1H, d,  $J$  = 13 Hz, CHCOH), 1.87 (1H, td,  $J$  = 13, 6 Hz, CH<sub>A</sub>H<sub>B</sub>COH), 2.20 (1H, td,  $J$  = 13, 4 Hz, CH<sub>3</sub>CCH<sub>A</sub>H<sub>B</sub>), 2.26 (1H, m, CH<sub>A</sub>H<sub>B</sub>CH<sub>2</sub>COHCCH<sub>3</sub>), 2.41 (1H, m, CH<sub>3</sub>CCH<sub>2</sub>CH<sub>A</sub>H<sub>B</sub>), 2.79 (1H, d,  $J$  = 19 Hz, CH<sub>A</sub>H<sub>B</sub>CHOHCH), 3.08 (1H, dd,  $J$  = 19, 3 Hz, CH<sub>A</sub>H<sub>B</sub>CHOHCH), 3.25 (1H, m, CHCHCHOH), 3.74 (3H, s, CH<sub>3</sub>O), 4.23 (1H, t,  $J$  = 8 Hz, CHOHCCH<sub>3</sub>), 4.39 (1H, br s, CHOHCH), 6.61 (1H, d,  $J$  = 2 Hz, aryl H-4), 6.71 (1H, dd,  $J$  = 9, 2 Hz, aryl H-2), 7.25 (1H, d,  $J$  = 9 Hz, aryl H-1). <sup>13</sup>C NMR (100 MHz, CD<sub>3</sub>OD)  $\delta$  15.8, 26.8, 30.0, 30.5, 31.0, 33.1, 39.6, 44.9, 48.4, 55.5, 67.5, 79.1, 85.8, 112.9, 115.1, 127.7, 133.6, 135.7, 159.0. HRMS-ESI ( $m/z$ ): [M + Na]<sup>+</sup> calcd for C<sub>19</sub>H<sub>26</sub>O<sub>4</sub>Na, 341.1723; found, 341.1726. mp 185-186 °C.

**Current Data Parameters**  
 NAME kawaiA400  
 EXPNO 85  
 PROCNO 1

**F2 - Acquisition Parameters**  
 Date\_ 20200817  
 Time\_ 12.12 h  
 INSTRUM spect  
 PROBHD 5 mm QNP 1H/13  
 PULPROG zg30  
 TD 65536  
 SOLVENT CDCl3  
 NS 16  
 DS 2  
 SWH 4901.961 Hz  
 FIDRES 0.149596 Hz  
 AQ 6.6846719 sec  
 RG 1024  
 DW 102.000 usec  
 DE 6.50 usec  
 TE 297.2 K  
 D1 1.00000000 sec  
 TD0 1  
 SFO1 400.1321477 MHz  
 NUC1 1H  
 P1 15.00 usec

**F2 - Processing parameters**  
 SI 32768  
 SF 400.130093 MHz  
 WDW EM  
 SSB 0  
 LB 0.30 Hz  
 GB 0  
 PC 1.00

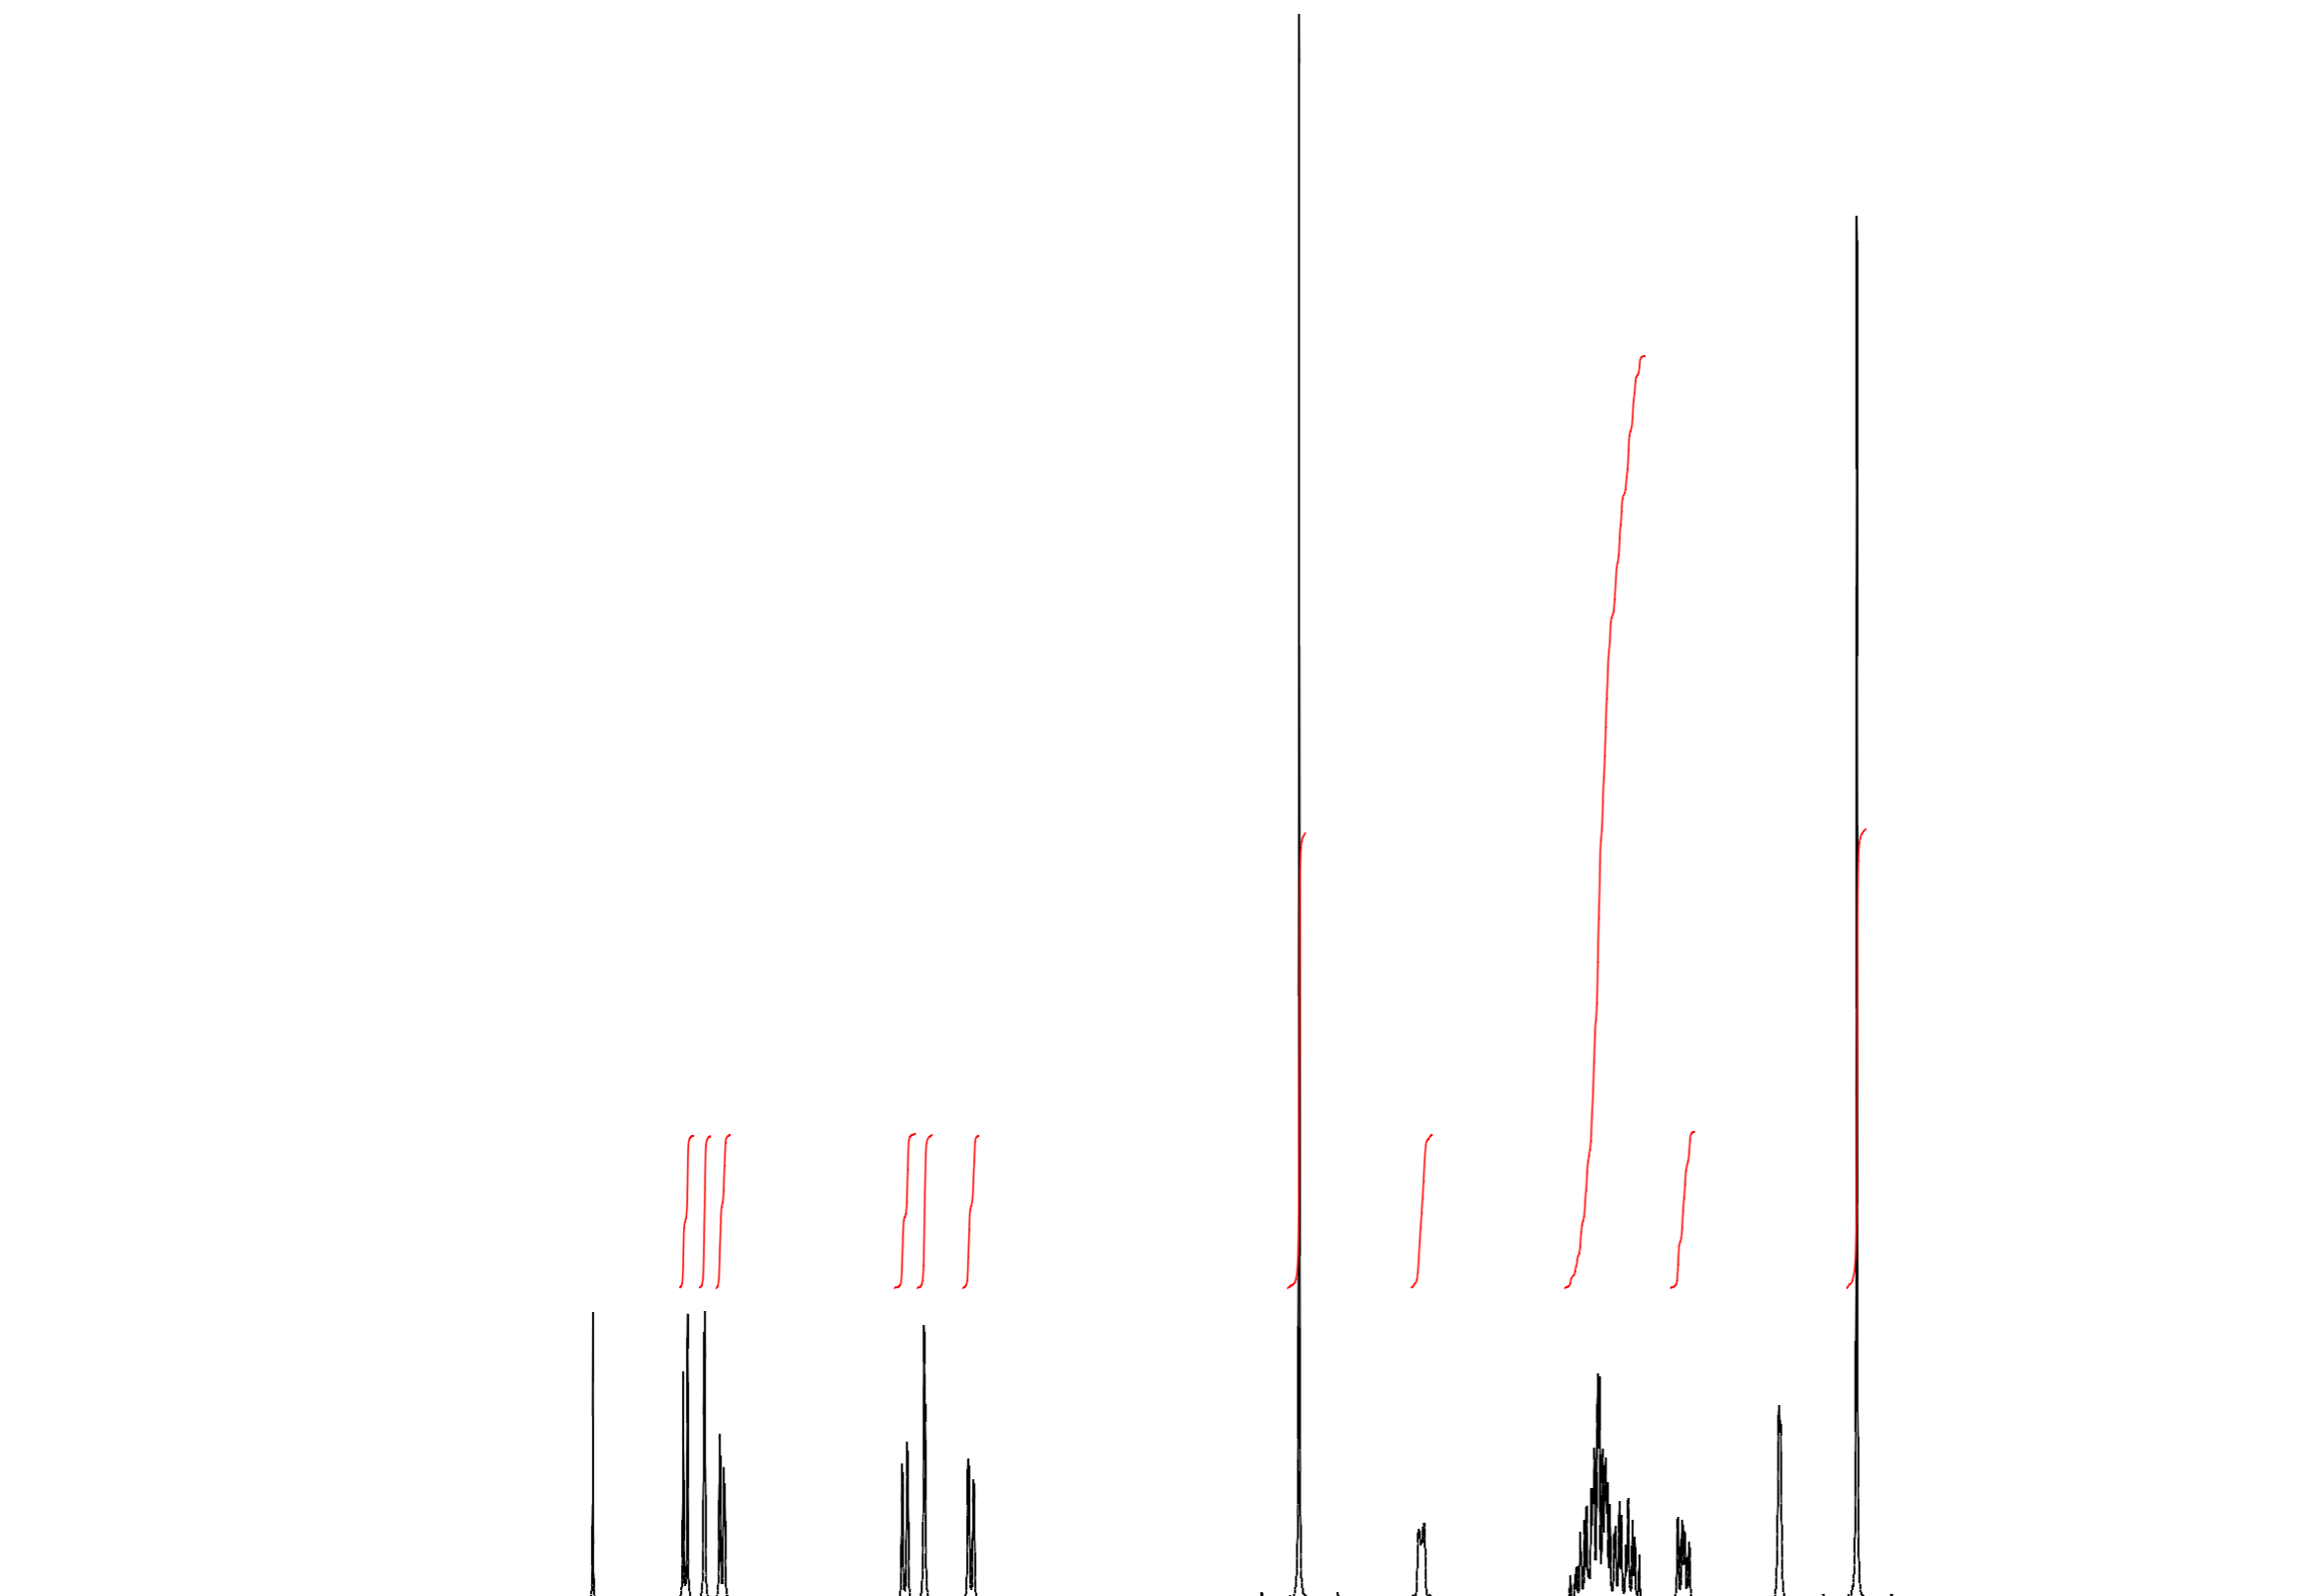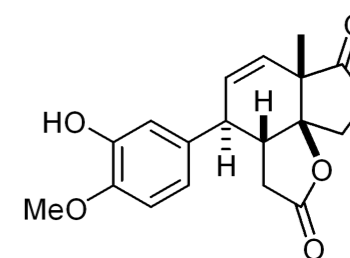

8

<sup>1</sup>H NMR (400 MHz, CDCl<sub>3</sub>)

9.5 9.0 8.5 8.0 7.5 7.0 6.5 6.0 5.5 5.0 4.5 4.0 3.5 3.0 2.5 2.0 1.5 1.0 0.5 0.0 -0.5 ppm

1.000 0.997 1.003 1.013 1.002 1.000 2.983 1.007 6.122 1.026 3.012

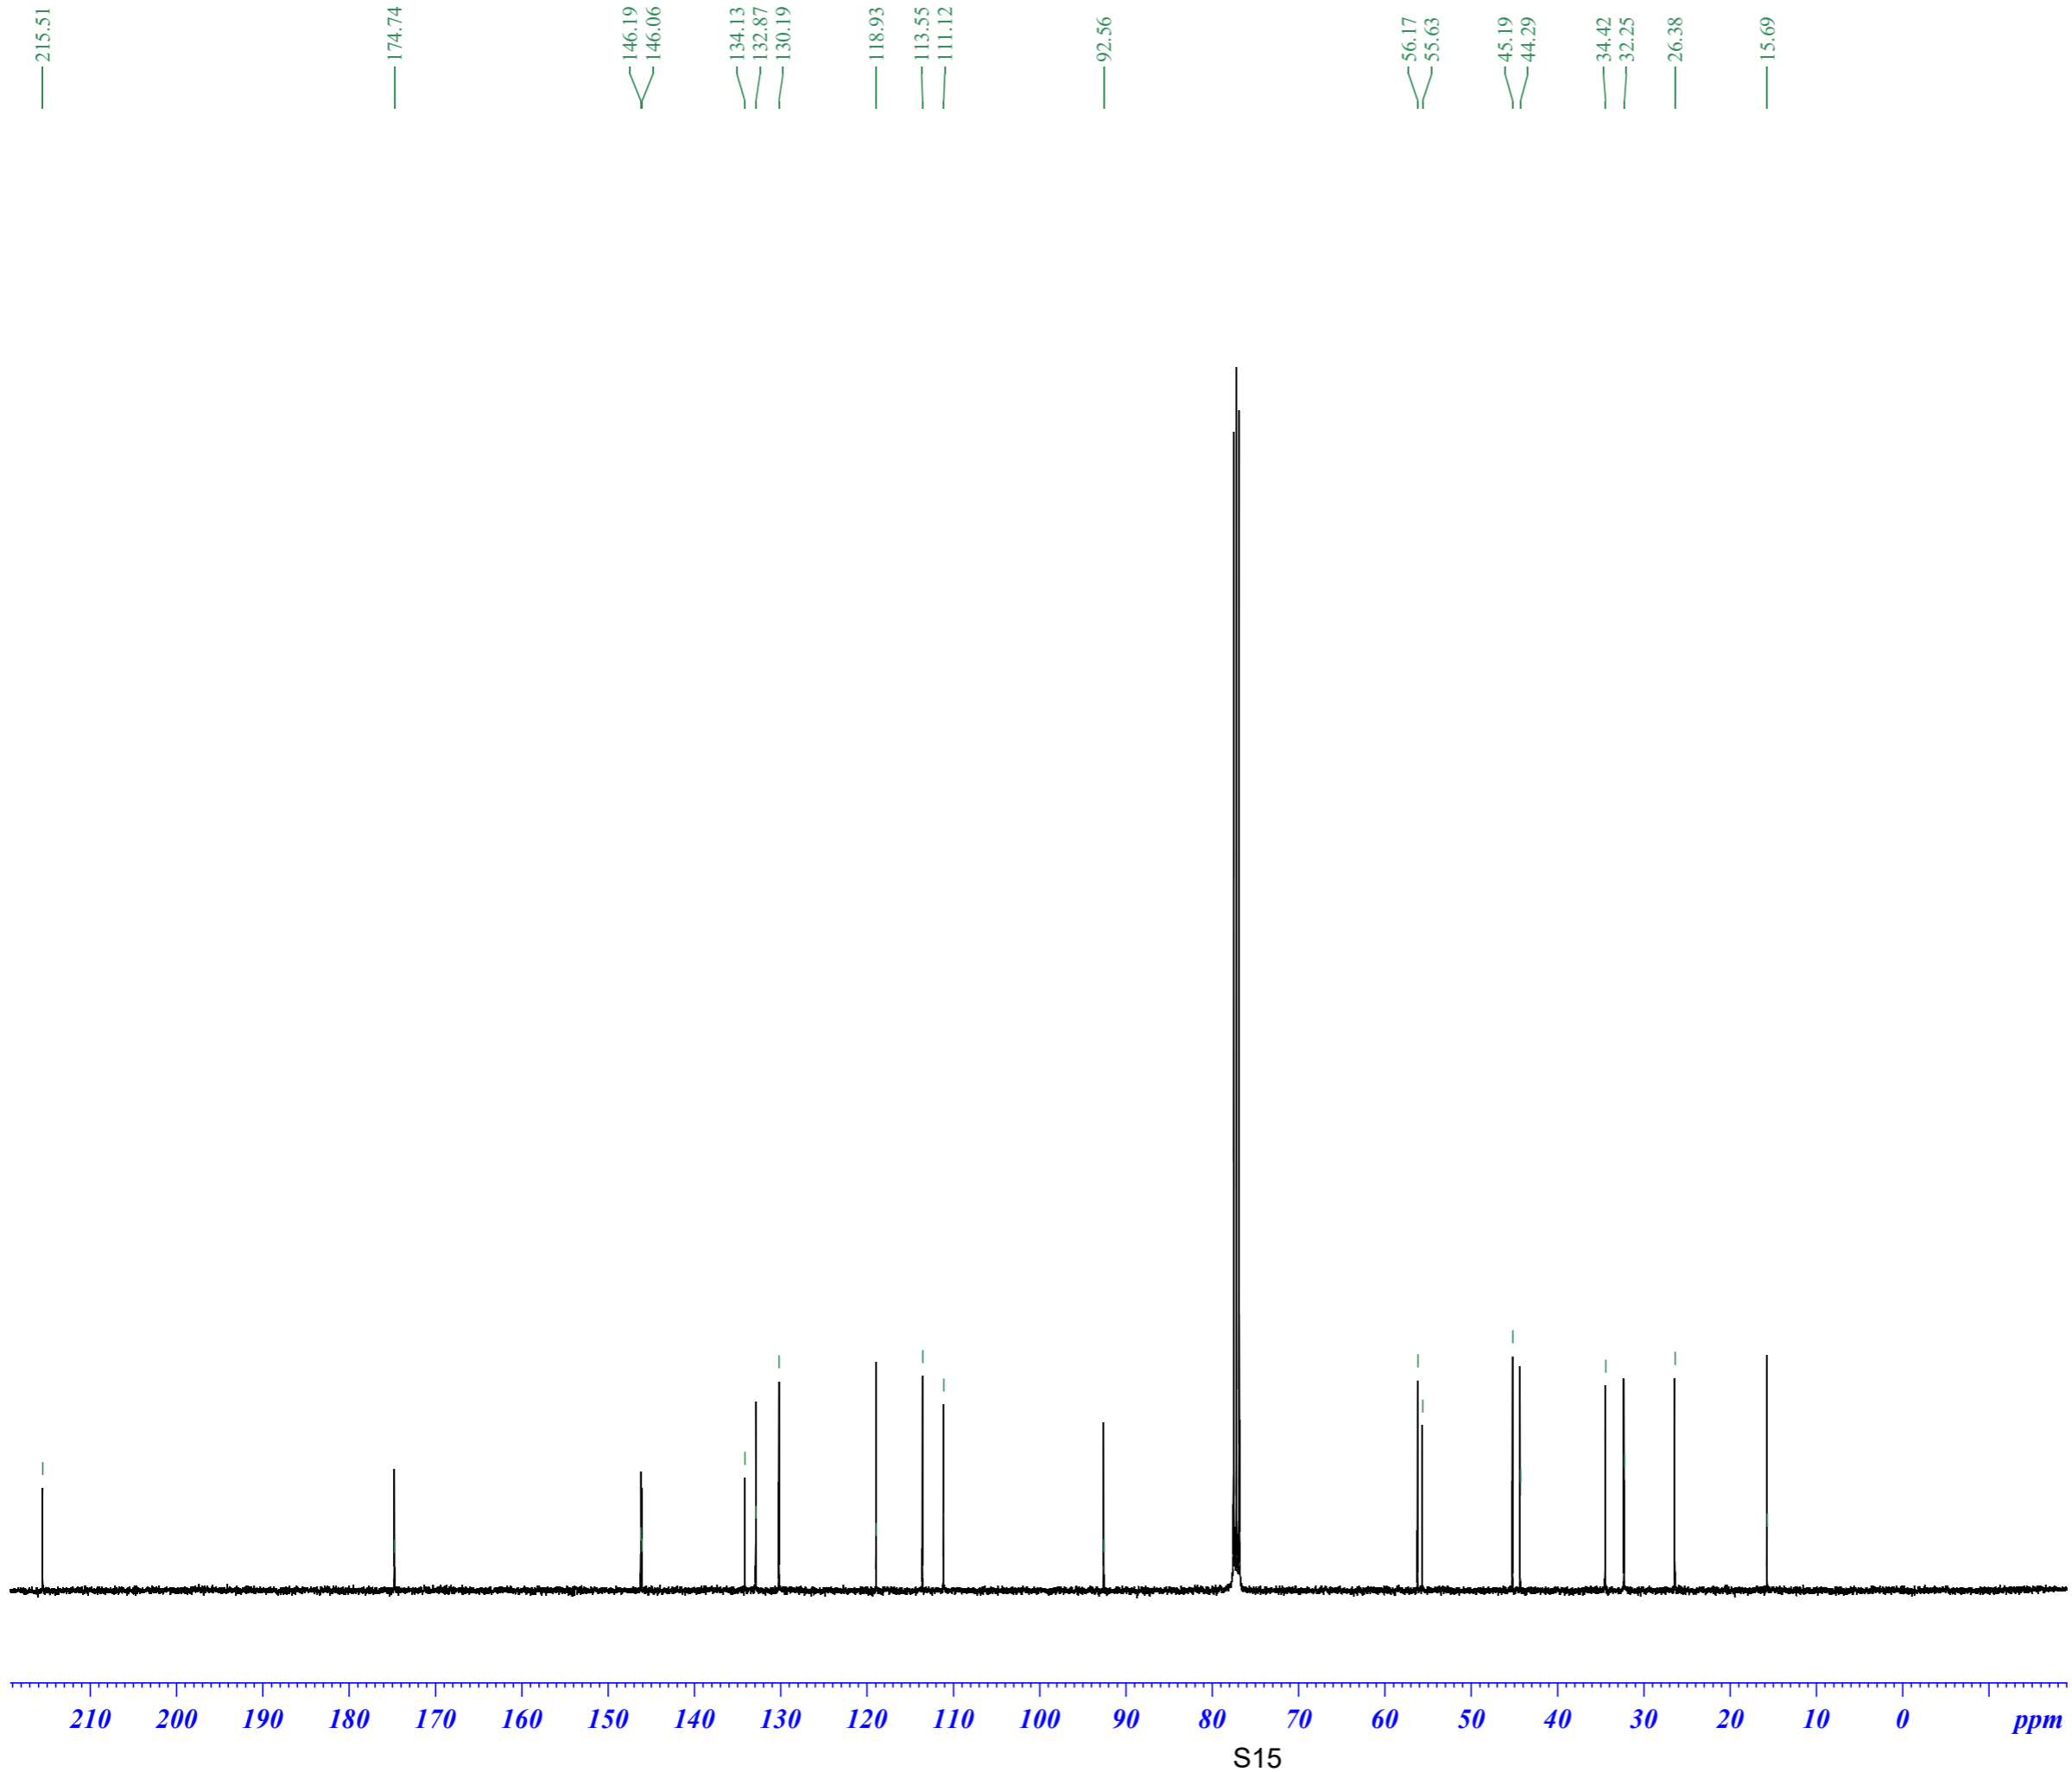

Current Data Parameters  
 NAME kawaiB400  
 EXPNO 245  
 PROCNO 1

F2 - Acquisition Parameters  
 Date\_ 20200817  
 Time\_ 13.40  
 INSTRUM spect  
 PROBHD 5 mm QNP 1H/13  
 PULPROG zgpg30  
 TD 65536  
 SOLVENT CDCl3  
 NS 2000  
 DS 4  
 SWH 23980.814 Hz  
 FIDRES 0.365918 Hz  
 AQ 1.3664256 sec  
 RG 2580.3  
 DW 20.850 usec  
 DE 6.50 usec  
 TE 298.2 K  
 D1 2.00000000 sec  
 D11 0.03000000 sec  
 TD0 1

==== CHANNEL f1 =====  
 NUC1 13C  
 P1 12.00 usec  
 PL1 7.50 dB  
 SFO1 100.6228298 MHz

==== CHANNEL f2 =====  
 CPDPRG[2] waltz16  
 NUC2 1H  
 PCPD2 80.00 usec  
 PL2 10.30 dB  
 PL12 25.00 dB  
 PL13 25.00 dB  
 SFO2 400.1316005 MHz

F2 - Processing parameters  
 SI 32768  
 SF 100.6127561 MHz  
 WDW EM  
 SSB 0  
 LB 1.00 Hz  
 GB 0  
 PC 1.40

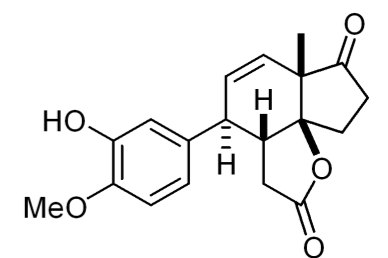

8

<sup>13</sup>C NMR (100 MHz, CDCl<sub>3</sub>)

Current Data Parameters  
NAME kawaiB400  
EXPNO 378  
PROCNO 1

F2 - Acquisition Parameters  
Date\_ 20210115  
Time\_ 8.54  
INSTRUM spect  
PROBHD 5 mm QNP 1H/13  
PULPROG noesyph  
TD 2048  
SOLVENT Acetone  
NS 28  
DS 2  
SWH 3396.739 Hz  
FIDRES 1.658564 Hz  
AQ 0.3014656 sec  
RG 645.1  
DW 147.200 usec  
DE 6.50 usec  
TE 293.2 K  
D0 0.00012810 sec  
D1 2.00000000 sec  
D8 0.60000002 sec  
IN0 0.00029440 sec

==== CHANNEL f1 =====  
NUC1 1H  
P1 15.00 usec  
PL1 10.30 dB  
SFO1 400.1317028 MHz

F1 - Acquisition parameters  
TD 128  
SFO1 400.1317 MHz  
FIDRES 53.074062 Hz  
SW 8.489 ppm  
FnMODE States-TPPI

F2 - Processing parameters  
SI 1024  
SF 400.130068 MHz  
WDW QSINE  
SSB 2  
LB 0 Hz  
GB 0  
PC 1.00

F1 - Processing parameters  
SI 1024  
MC2 States-TPPI  
SF 400.130076 MHz  
WDW QSINE  
SSB 2  
LB 0 Hz  
GB 0

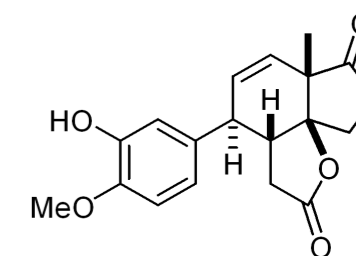

8

NOESY (acetone-d<sub>6</sub>)

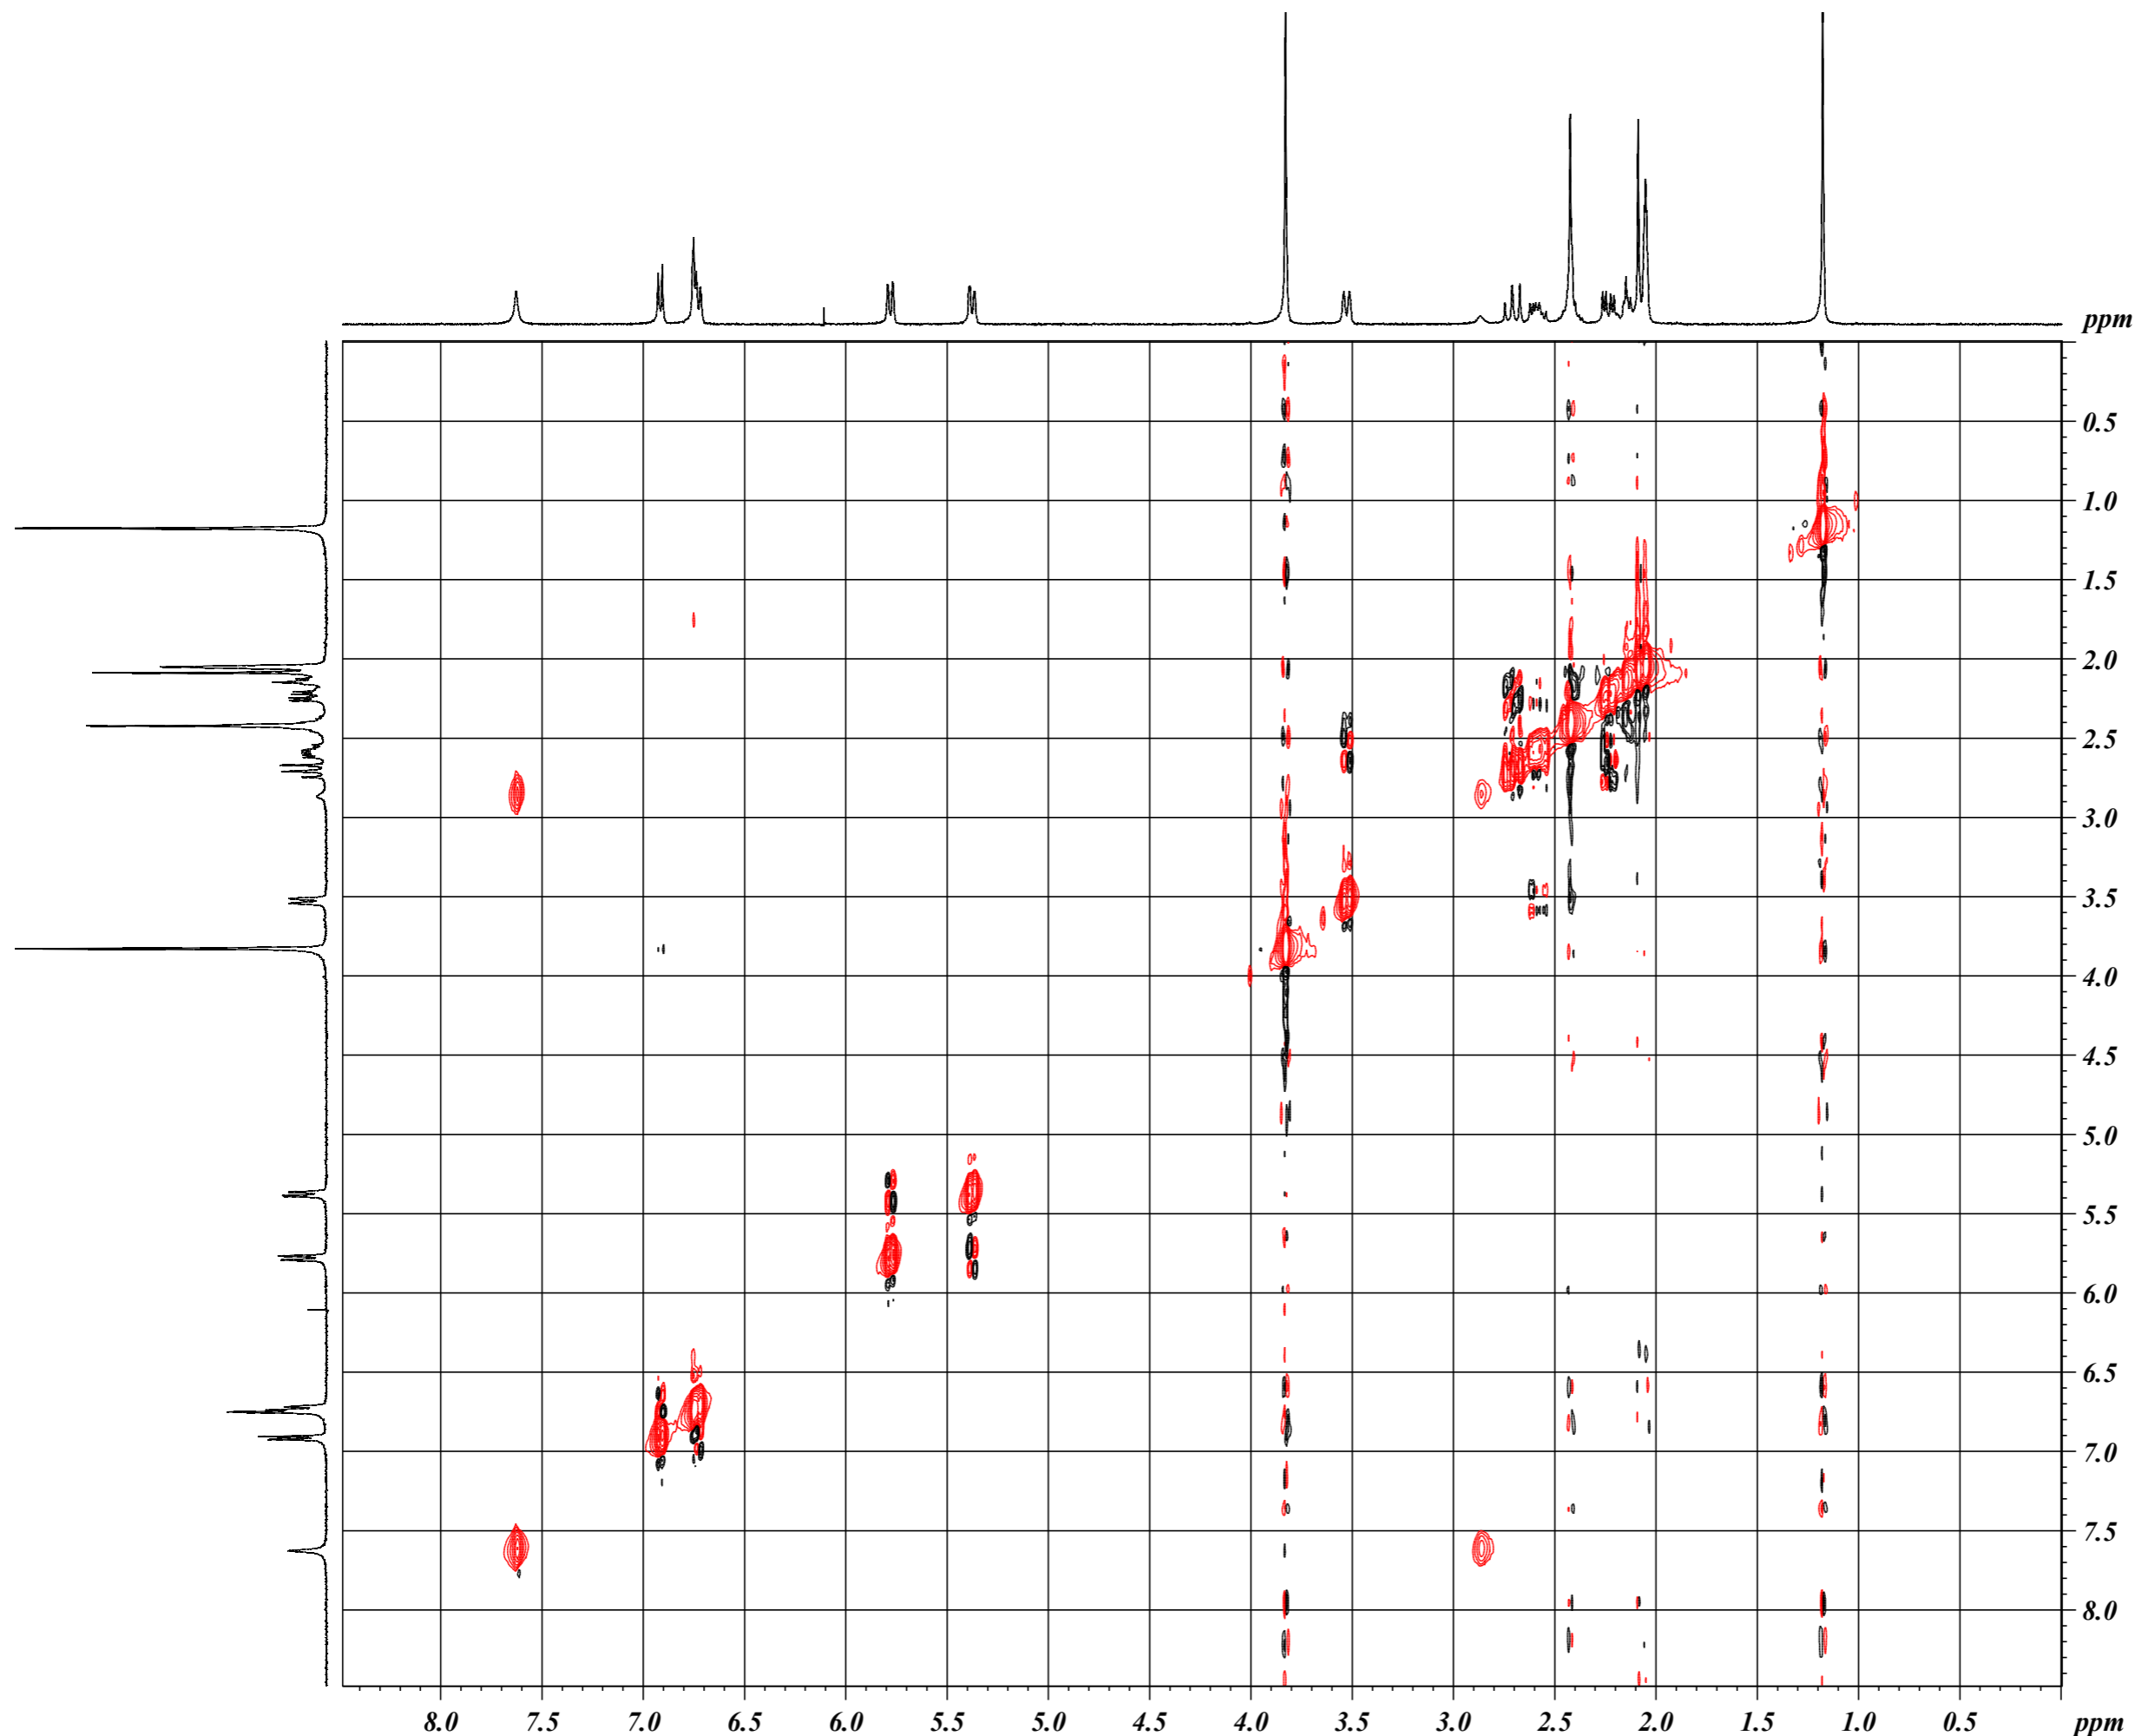

S16



Current Data Parameters  
NAME kawaiB400-2  
EXPNO 13  
PROCNO 1

F2 - Acquisition Parameters  
Date\_ 20210303  
Time\_ 8.57 h  
INSTRUM spect  
PROBHD 5 mm QNP 1H/13  
PULPROG zg30  
TD 65536  
SOLVENT CDCl3  
NS 16  
DS 2  
SWH 8278.146 Hz  
FIDRES 0.252629 Hz  
AQ 3.9583745 sec  
RG 322.5  
DW 60.400 usec  
DE 6.50 usec  
TE 296.5 K  
D1 1.0000000 sec  
TD0 1  
SFO1 400.1324710 MHz  
NUC1 1H  
P1 15.00 usec

F2 - Processing parameters  
SI 32768  
SF 400.130095 MHz  
WDW EM  
SSB 0  
LB 0.30 Hz  
GB 0  
PC 1.00

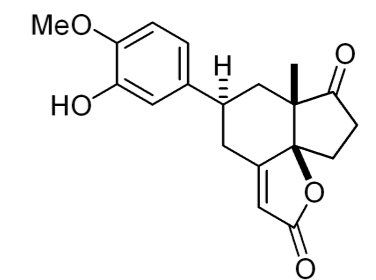

9

<sup>1</sup>H NMR (400 MHz, CDCl<sub>3</sub>)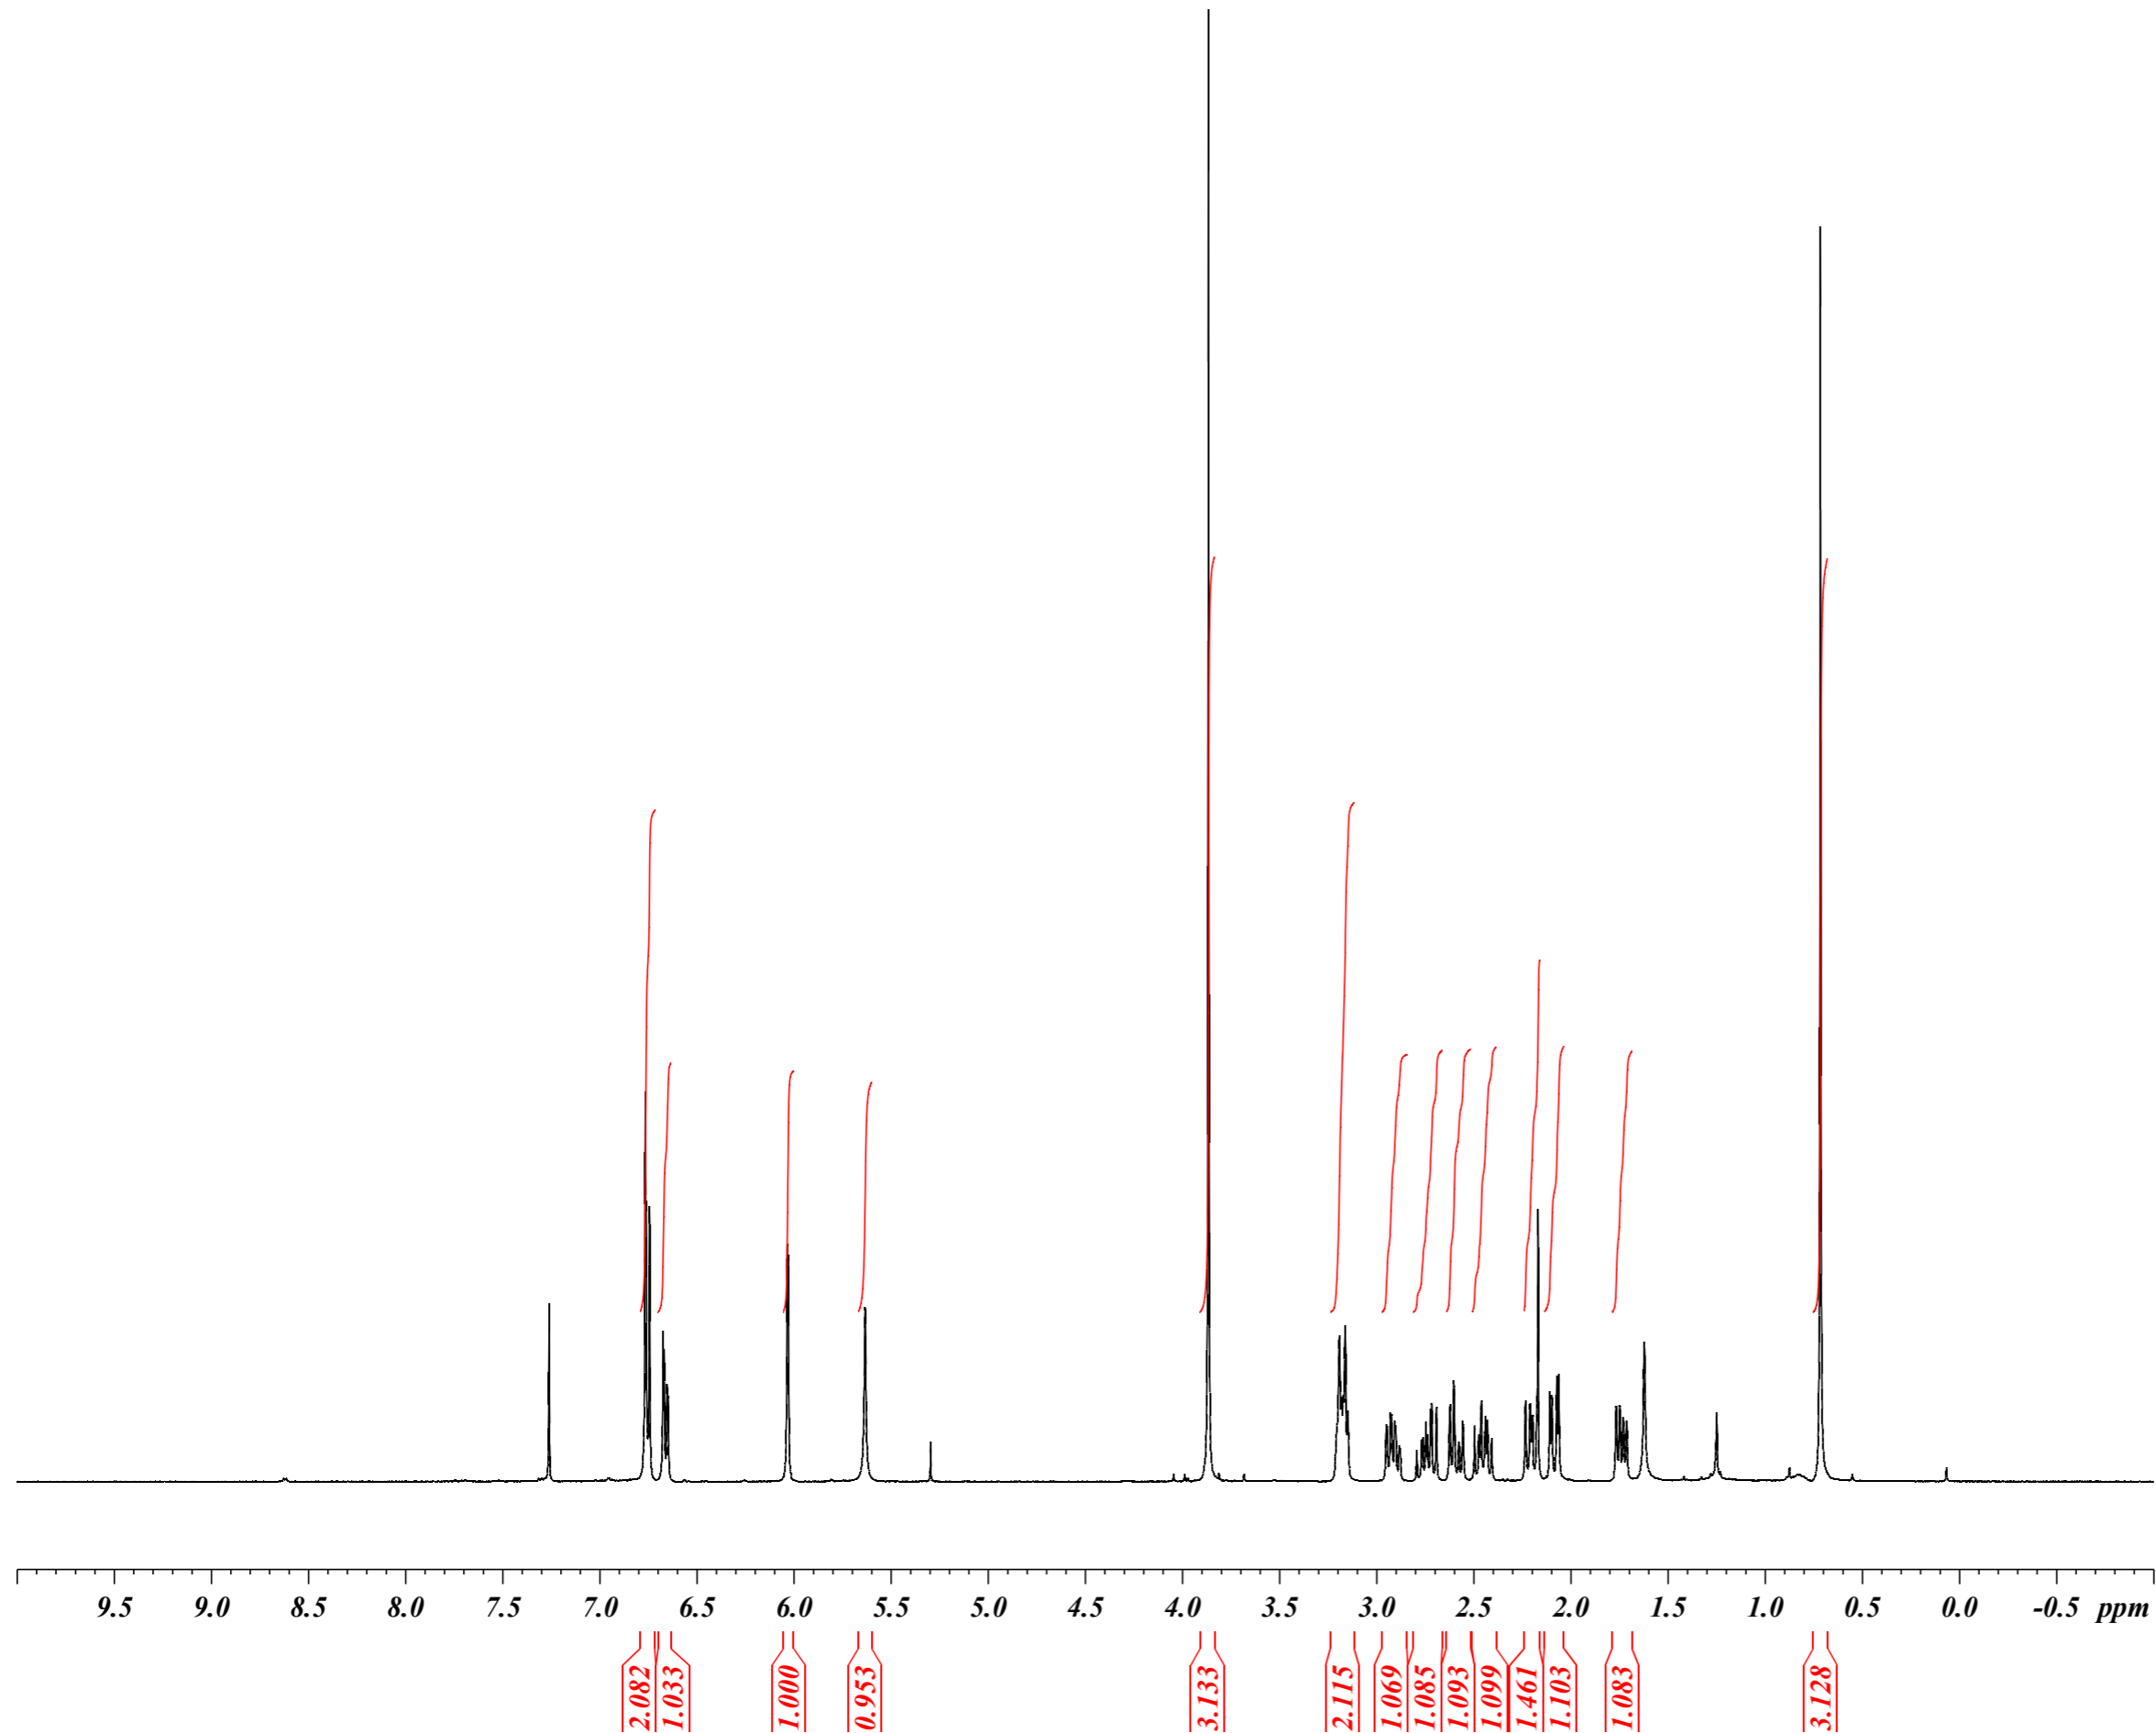

2077 bp 210301

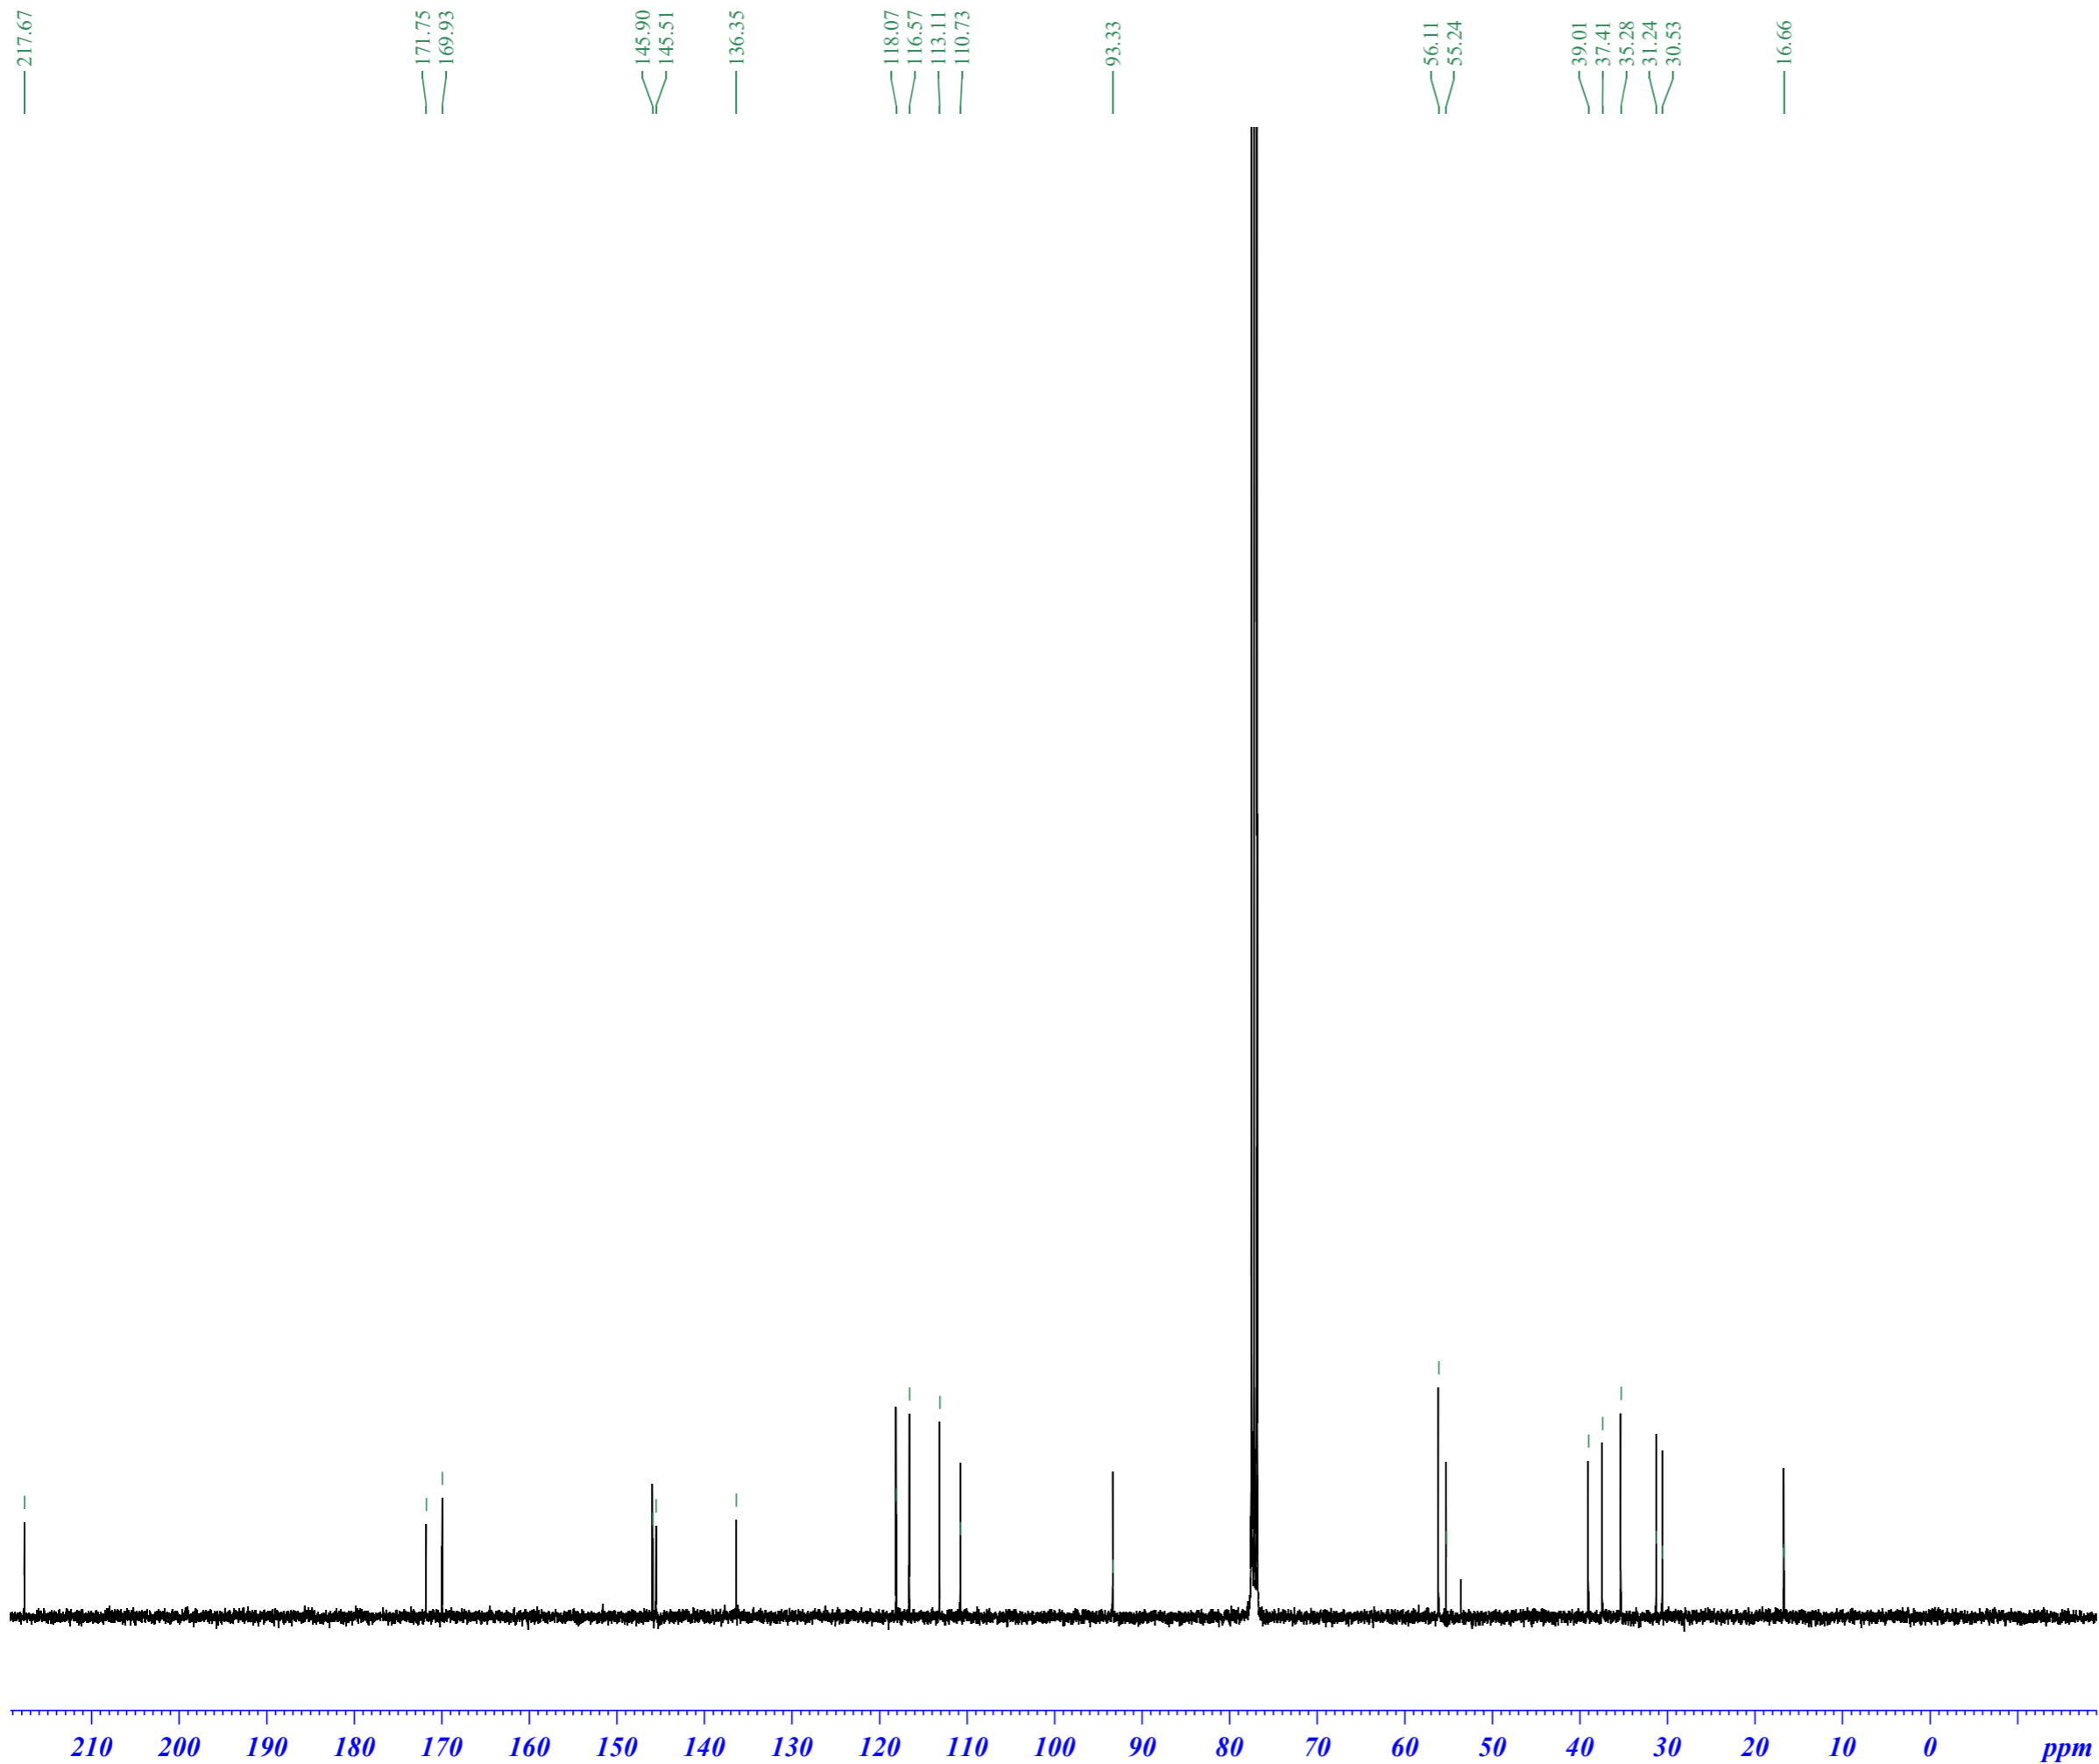

Current Data Parameters  
NAME kawaiB400-2  
EXPNO 9  
PROCNO 1

F2 - Acquisition Parameters  
Date\_ 20210301  
Time\_ 17.41 h  
INSTRUM spect  
PROBHD 5 mm QNP 1H/13  
PULPROG zgpg30  
TD 65536  
SOLVENT CDCl3  
NS 2000  
DS 4  
SWH 23980.814 Hz  
FIDRES 0.731836 Hz  
AQ 1.3664256 sec  
RG 362  
DW 20.850 usec  
DE 6.50 usec  
TE 298.4 K  
D1 1.20000005 sec  
d11 0.03000000 sec  
DELTA 1.10000002 sec  
TD0 1  
SFO1 100.6228298 MHz  
NUC1 13C  
P1 10.00 usec  
SFO2 400.1316005 MHz  
NUC2 1H  
CPDPRG[2] waltz16  
PCPD2 80.00 usec

F2 - Processing parameters  
SI 32768  
SF 100.6127552 MHz  
WDW EM  
SSB 0  
LB 1.00 Hz  
GB 0  
PC 1.40

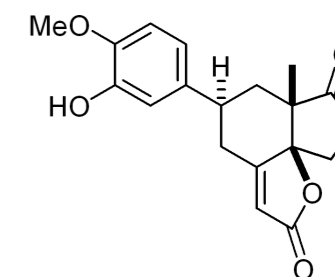

9

<sup>13</sup>C NMR (100 MHz, CDCl<sub>3</sub>)

2077 21 01 13 BP

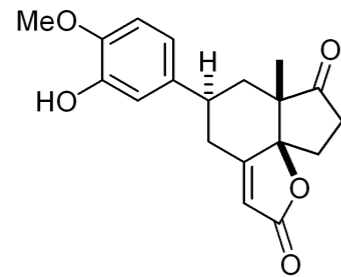

9

COSY (acetone-d<sub>6</sub>)

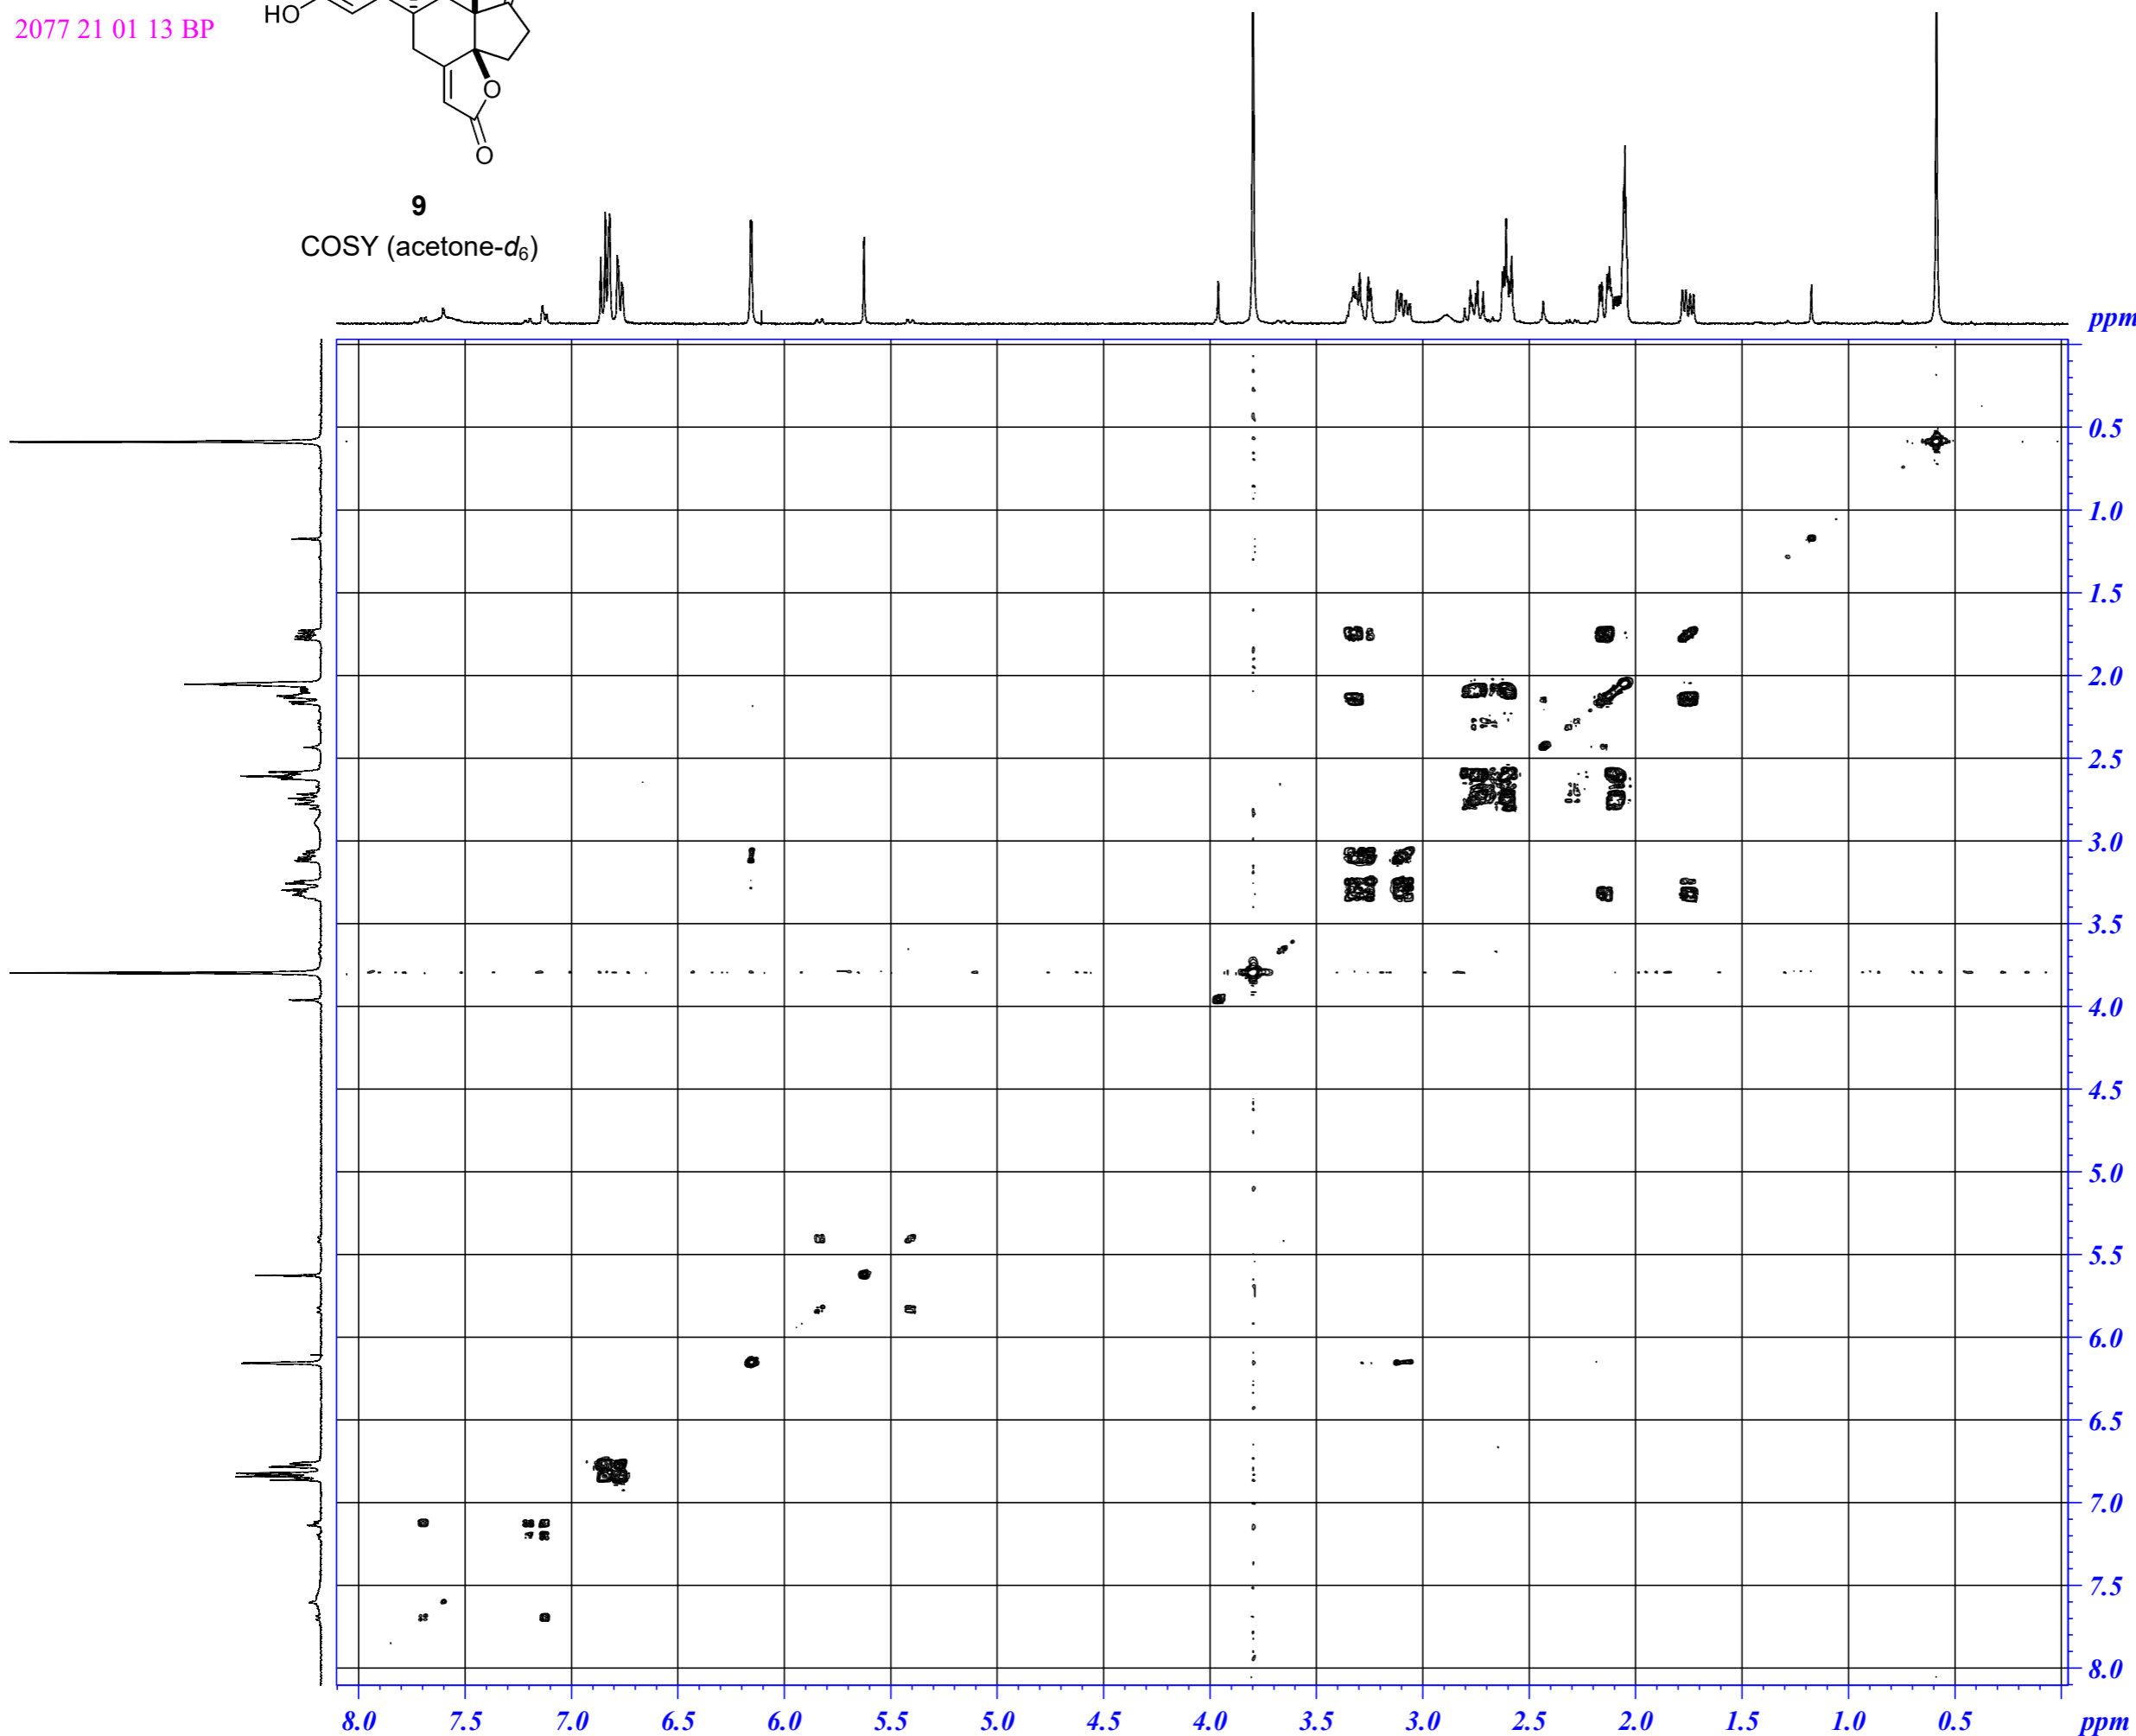

Current Data Parameters  
NAME kawaiB400  
EXPNO 370  
PROCNO 1

F2 - Acquisition Parameters  
Date\_ 20210113  
Time 12.33  
INSTRUM spect  
PROBHD 5 mm QNP 1H/13  
PULPROG cosygpgf  
TD 2048  
SOLVENT Acetone  
NS 1  
DS 2  
SWH 3255.208 Hz  
FIDRES 1.589457 Hz  
AQ 0.3145728 sec  
RG 11585.2  
DW 153.600 usec  
DE 6.50 usec  
TE 293.2 K  
D0 0.00000300 sec  
D1 1.48689198 sec  
D13 0.00000400 sec  
D16 0.00020000 sec  
IN0 0.00030720 sec

==== CHANNEL f1 =====  
NUC1 1H  
P0 15.00 usec  
P1 15.00 usec  
PL1 10.30 dB  
SFO1 400.1316217 MHz

==== GRADIENT CHANNEL =====  
GPNAM[1] SINE.100  
GPZ1 10.00 %  
P16 1000.00 usec

F1 - Acquisition parameters  
TD 256  
SFO1 400.1316 MHz  
FIDRES 25.431303 Hz  
SW 8.135 ppm  
FnMODE QF

F2 - Processing parameters  
SI 1024  
SF 400.130069 MHz  
WDW SINE  
SSB 0  
LB 0 Hz  
GB 0  
PC 1.40

F1 - Processing parameters  
SI 1024  
MC2 QF  
SF 400.130069 MHz  
WDW SINE  
SSB 0  
LB 0 Hz  
GB 0

2077bp 210304 bc

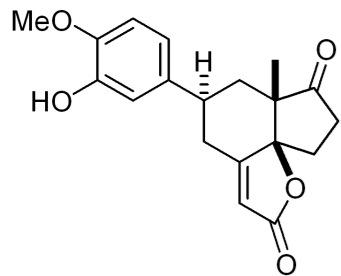

9

HMBC (acetone-d<sub>6</sub>)

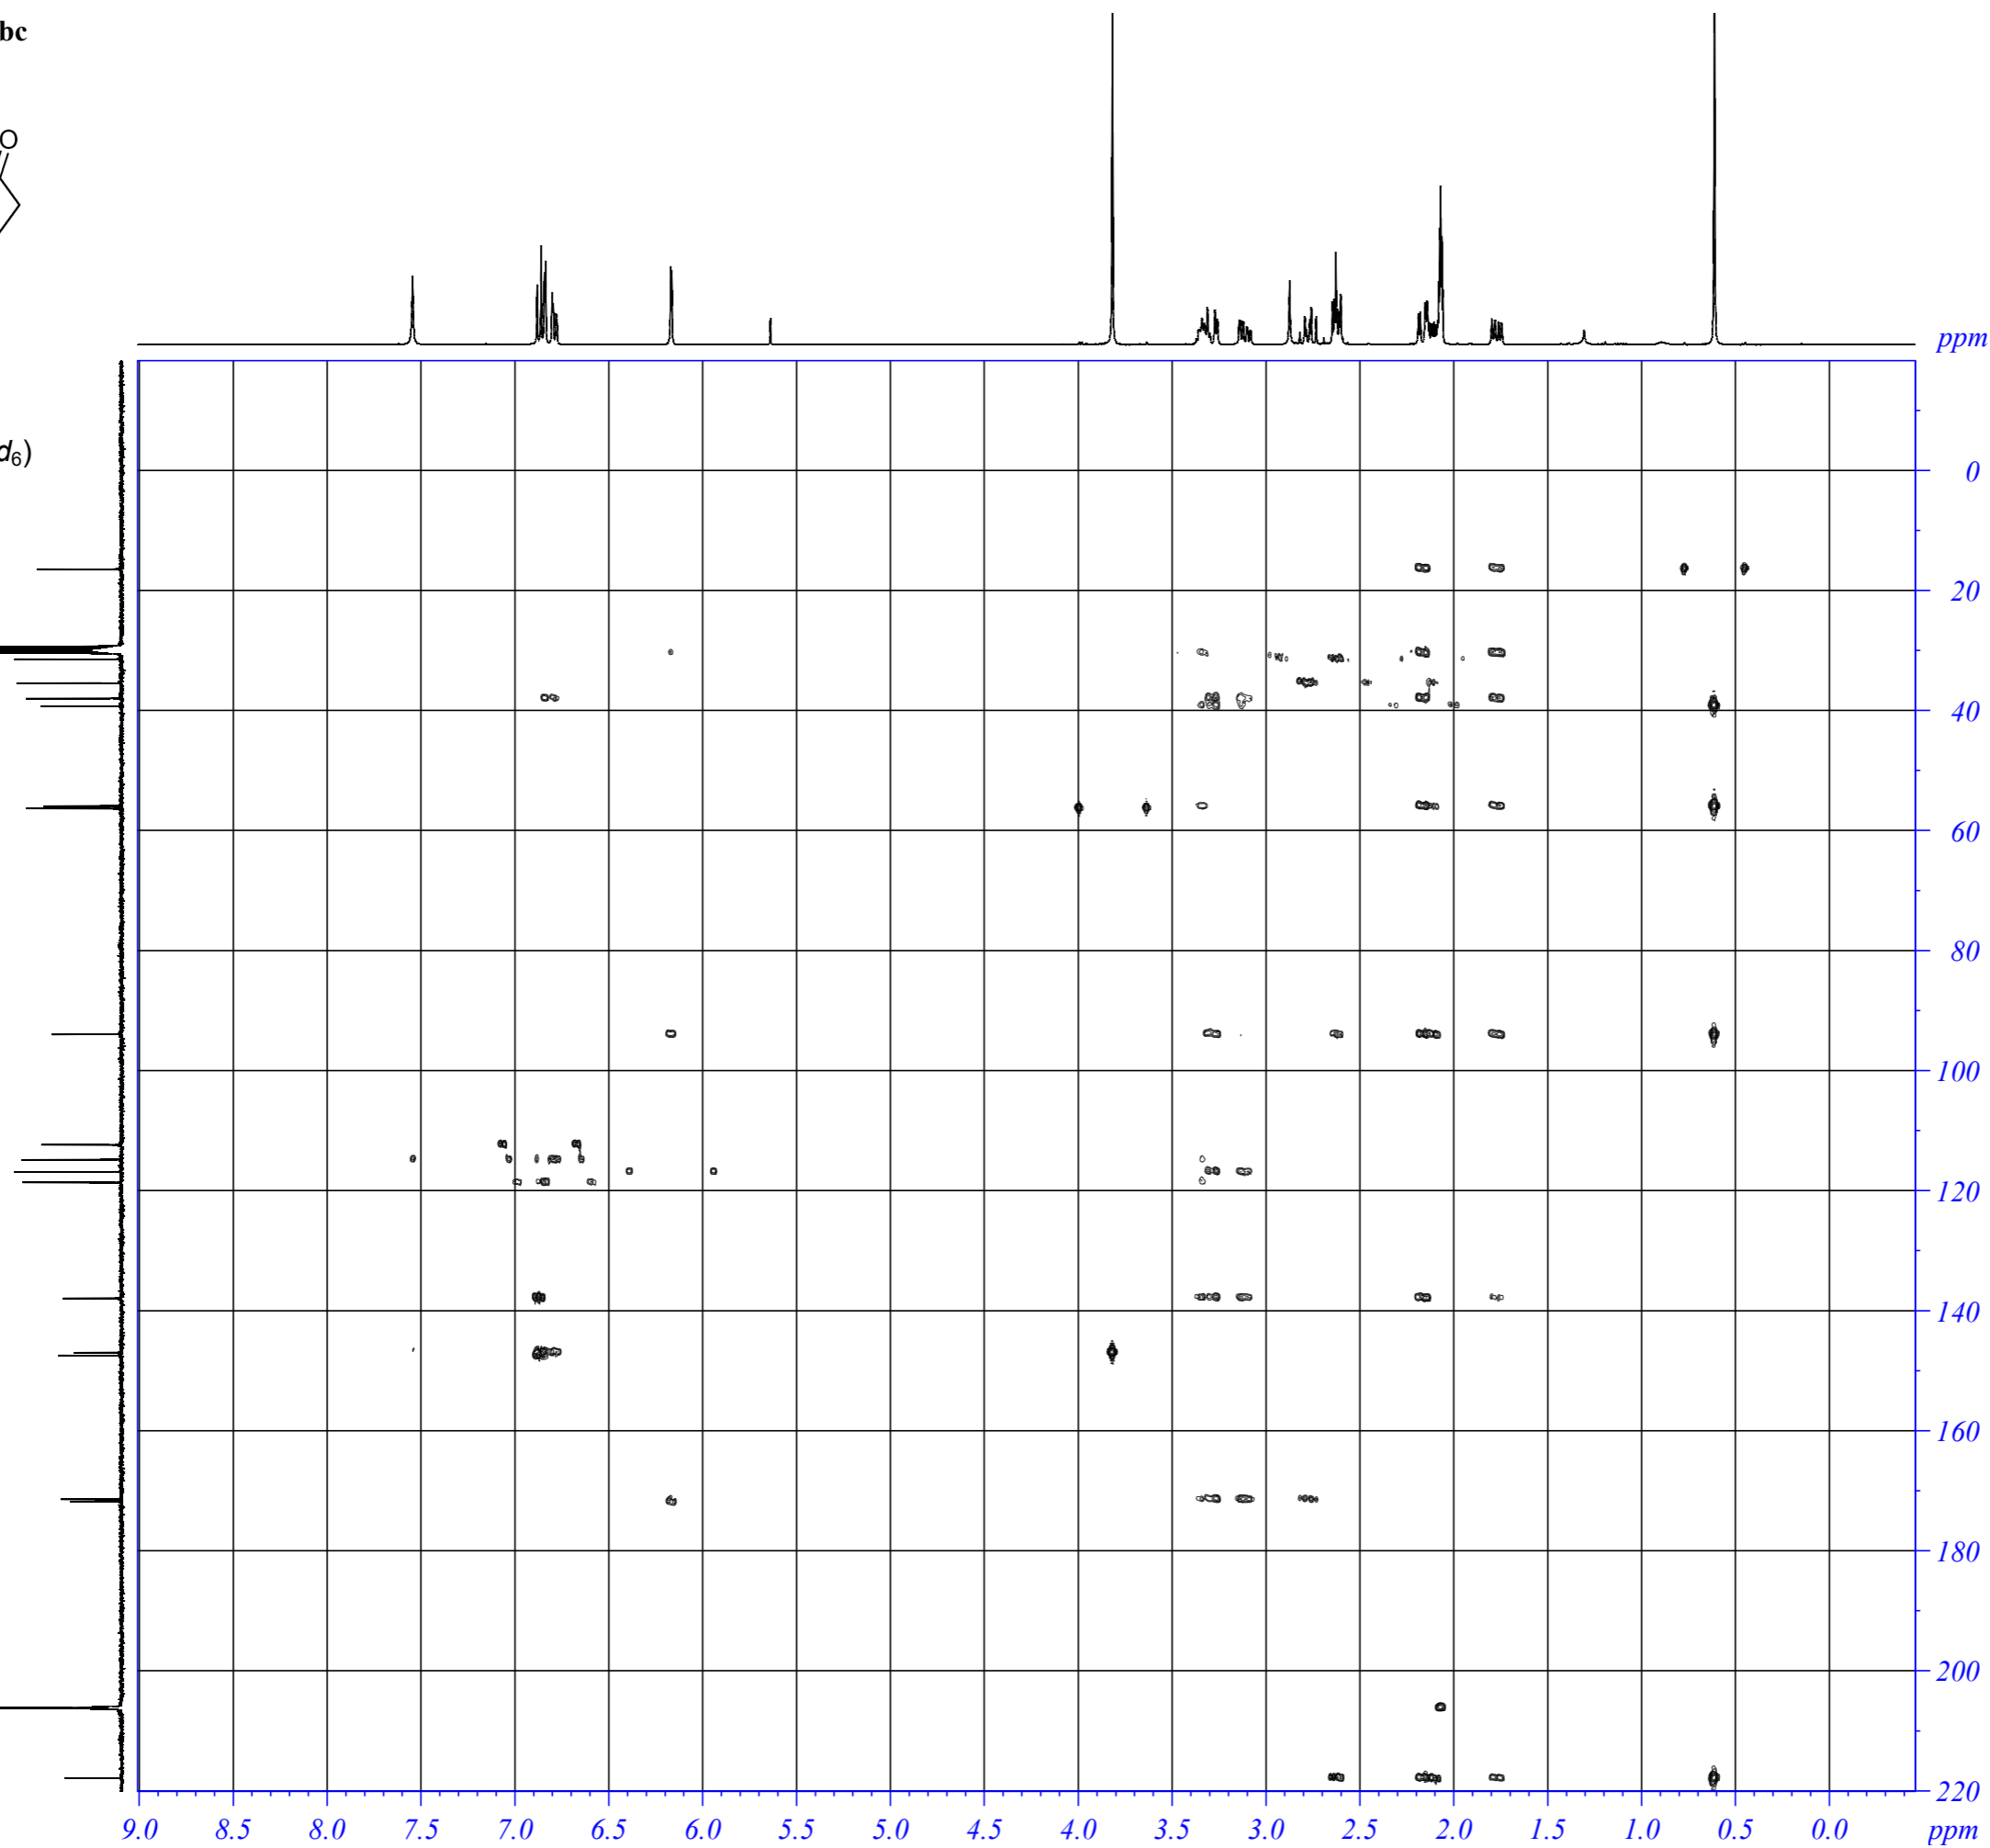

Current Data Parameters  
NAME kawaiB400-2  
EXPNO 24  
PROCNO 1

F2 - Acquisition Parameters  
Date\_ 20210304  
Time\_ 22.26 h  
INSTRUM spect  
PROBHD 5 mm QNP 1H/13  
PULPROG hmbcgpndqf  
TD 2048  
SOLVENT Acetone  
NS 32  
DS 16  
SWH 3787.879 Hz  
FIDRES 3.699100 Hz  
AQ 0.2703360 sec  
RG 23170.5  
DW 132.000 usec  
DE 6.50 usec  
TE 297.7 K  
CNST2 145.0000000  
CNST13 10.0000000  
d0 0.00000300 sec  
D1 1.07711995 sec  
d2 0.00344828 sec  
d6 0.05000000 sec  
D16 0.00010000 sec  
in0 0 sec  
SFO1 400.1317102 MHz  
NUC1 1H  
P1 15.00 usec  
p2 30.00 usec  
SFO2 100.6228298 MHz  
NUC2 13C  
P3 10.00 usec  
GPNAM[1] SINE.100  
GPZ1 50.00 %  
GPNAM[2] SINE.100  
GPZ2 30.00 %  
GPNAM[3] SINE.100  
GPZ3 40.10 %  
P16 1000.00 usec

F1 - Acquisition parameters  
TD 256  
SFO1 100.6228 MHz  
FIDRES 187.350113 Hz  
SW 238.324 ppm  
FnMODE QF

F2 - Processing parameters  
SI 2048  
SF 400.1299998 MHz  
WDW SINE  
SSB 0  
LB 0 Hz  
GB 0  
PC 1.40

F1 - Processing parameters  
SI 1024  
MC2 QF  
SF 100.6126797 MHz  
WDW SINE  
SSB 0  
LB 0 Hz  
GB 0

2077bp 210304 qc

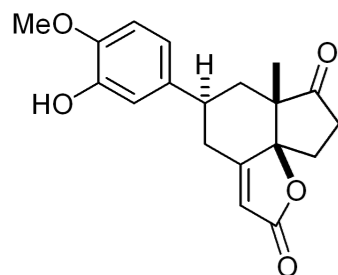

9

HMQC (acetone-d<sub>6</sub>)

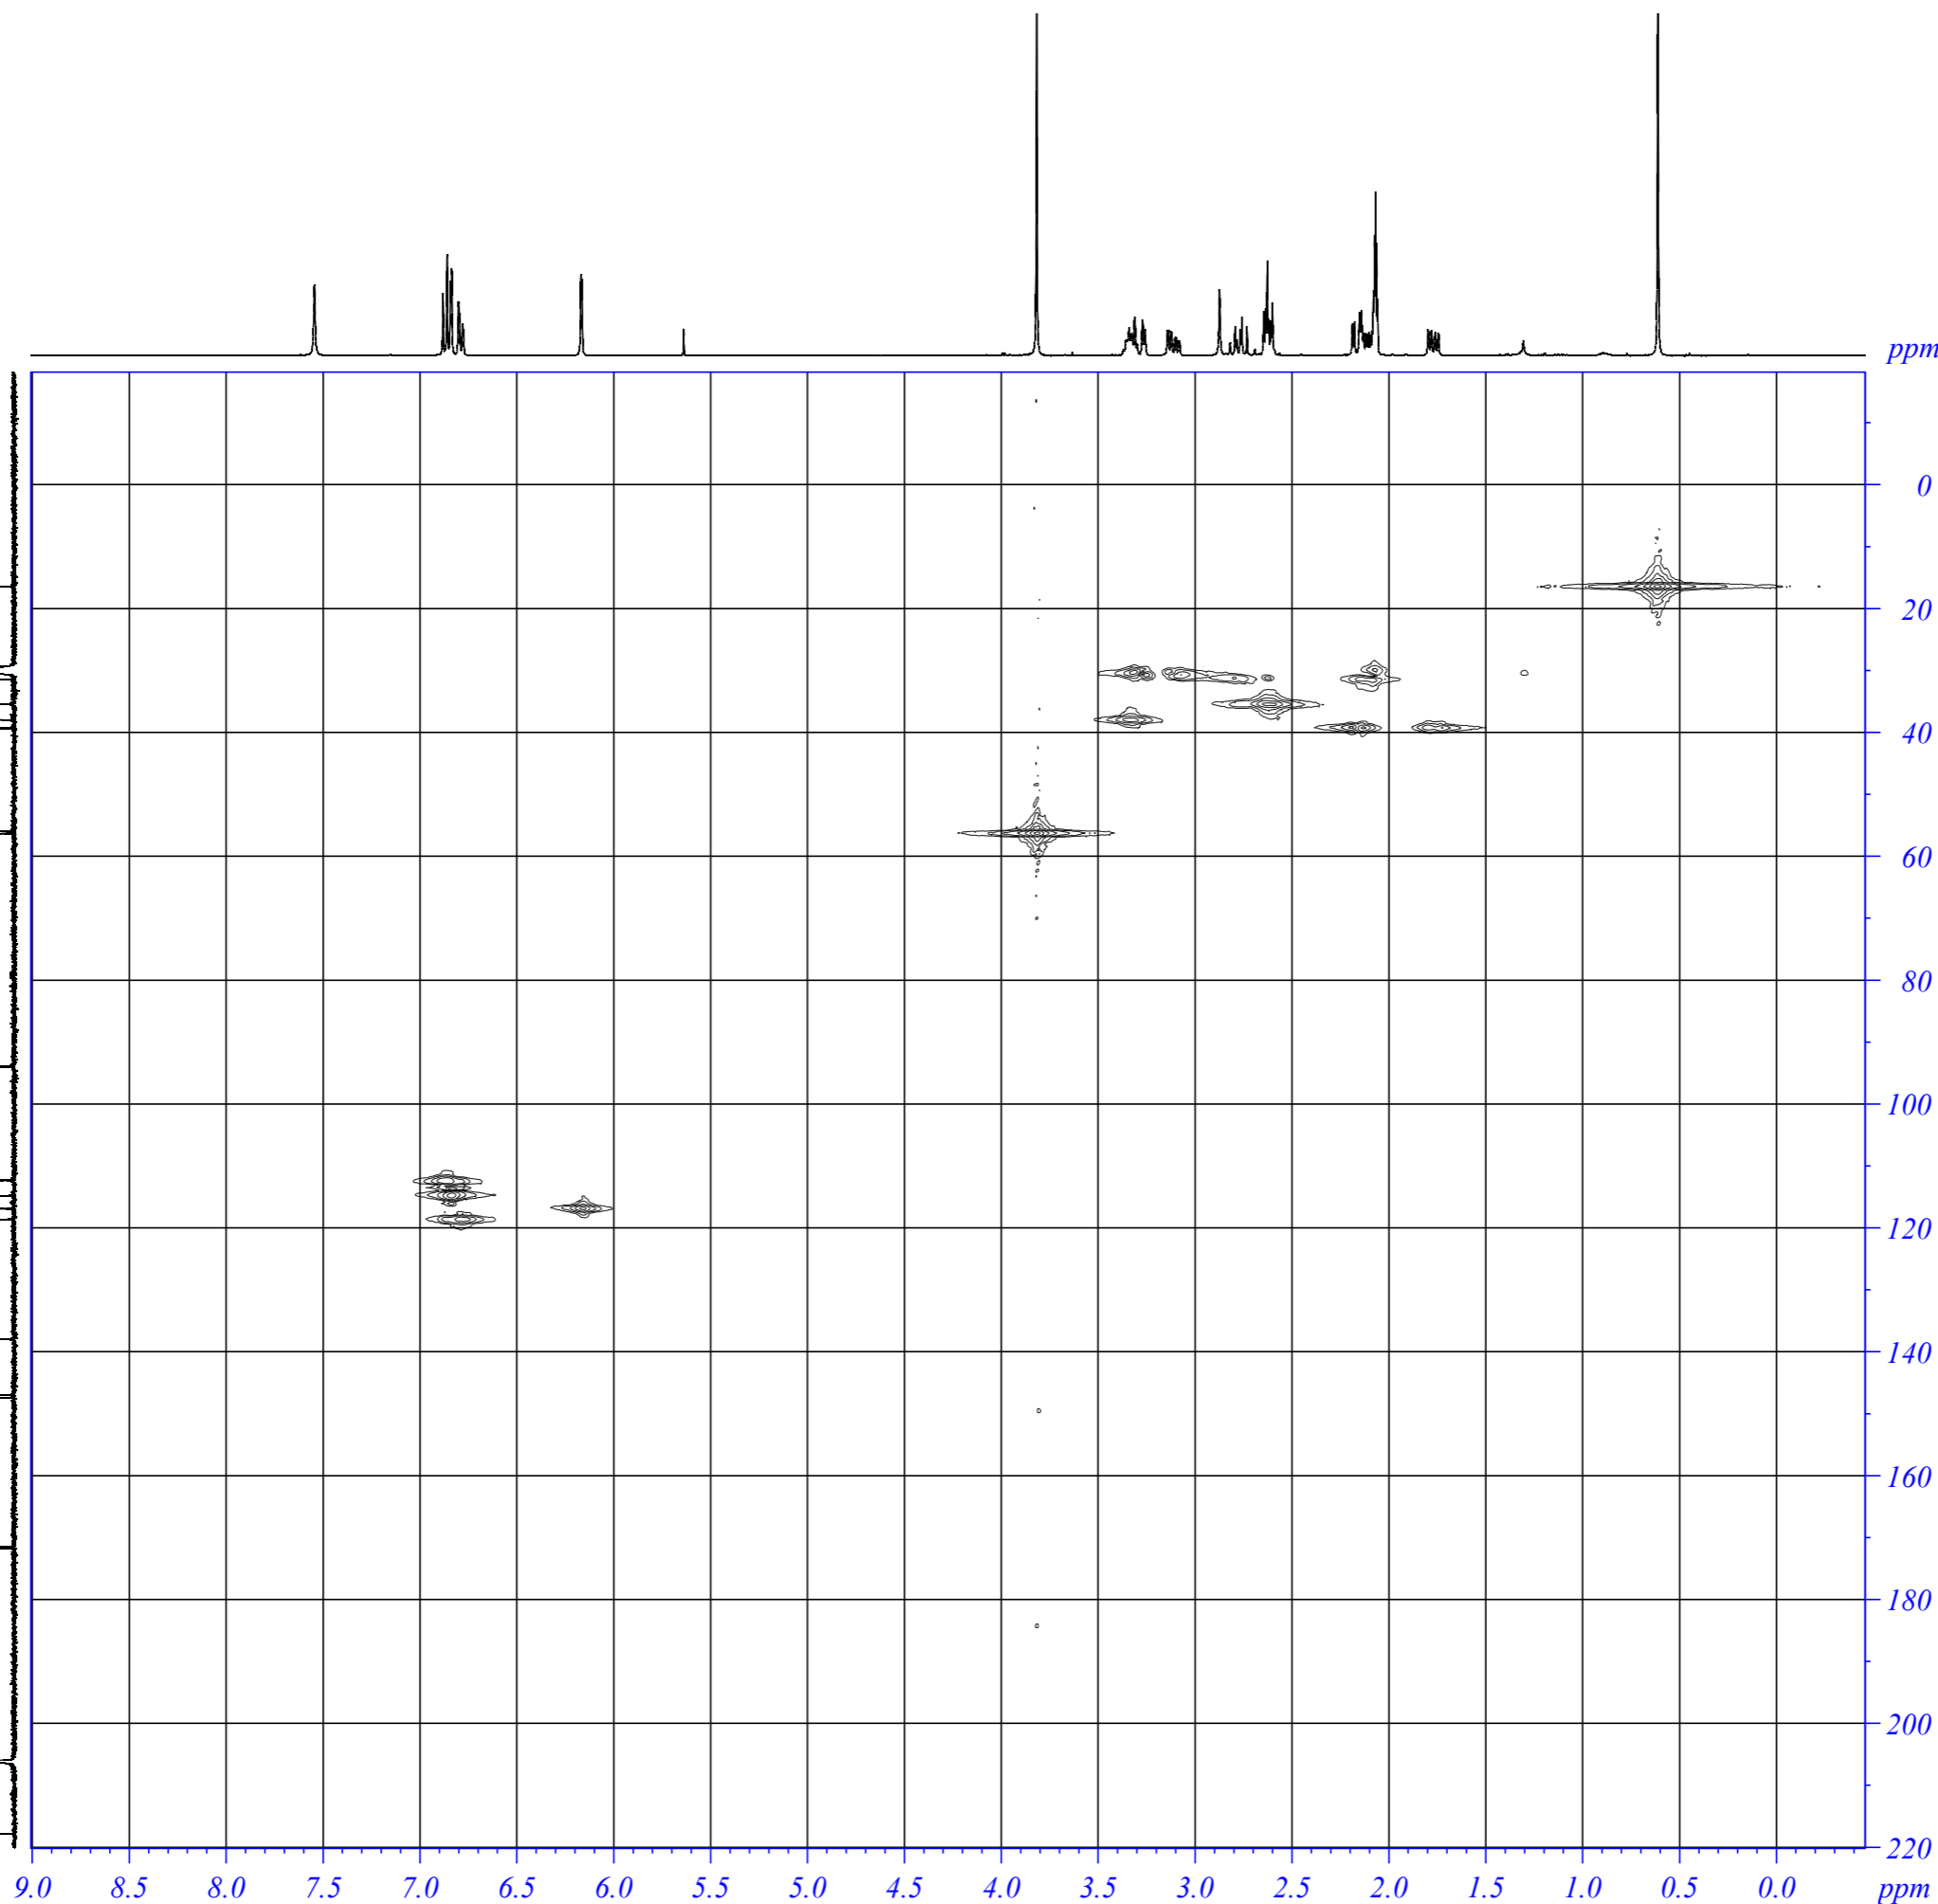

Current Data Parameters  
NAME kawaiB400-2  
EXPNO 25  
PROCNO 1

F2 - Acquisition Parameters  
Date\_ 20210305  
Time 1.40 h  
INSTRUM spect  
PROBHD 5 mm QNP 1H/13  
PULPROG hmqcgpqf  
TD 2048  
SOLVENT Acetone  
NS 32  
DS 16  
SWH 3787.879 Hz  
FIDRES 3.699100 Hz  
AQ 0.2703360 sec  
RG 26008  
DW 132.000 usec  
DE 6.50 usec  
TE 296.6 K  
CNST2 145.0000000  
d0 0.00000300 sec  
D1 1.50000000 sec  
d2 0.00344828 sec  
d12 0.00002000 sec  
d13 0.00000400 sec  
D16 0.00010000 sec  
DELTA1 0.00232428 sec  
in0 0 sec  
SFO1 400.1317102 MHz  
NUC1 1H  
P1 15.00 usec  
p2 30.00 usec  
SFO2 100.6228298 MHz  
NUC2 13C  
CPDPRG[2] garp  
P3 10.00 usec  
PCPD2 70.00 usec  
GPNAM[1] SINE.100  
GPZ1 50.00 %  
GPNAM[2] SINE.100  
GPZ2 30.00 %  
GPNAM[3] SINE.100  
GPZ3 40.10 %  
P16 1000.00 usec

F1 - Acquisition parameters  
TD 256  
SFO1 100.6228 MHz  
FIDRES 187.350113 Hz  
SW 238.324 ppm  
FnMODE QF

F2 - Processing parameters  
SI 1024  
SF 400.1300000 MHz  
WDW QSINE  
SSB 2  
LB 0 Hz  
GB 0  
PC 1.40

F1 - Processing parameters  
SI 1024  
MC2 QF  
SF 100.6126690 MHz  
WDW QSINE  
SSB 2  
LB 0 Hz  
GB 0

S21

Current Data Parameters  
NAME kawaiB400  
EXPNO 376  
PROCNO 1

F2 - Acquisition Parameters  
Date\_ 20210114  
Time\_ 9.10  
INSTRUM spect  
PROBHD 5 mm QNP 1H/13  
PULPROG noesyph  
TD 2048  
SOLVENT Acetone  
NS 24  
DS 2  
SWH 3324.468 Hz  
FIDRES 1.623275 Hz  
AQ 0.3080192 sec  
RG 456.1  
DW 150.400 usec  
DE 6.50 usec  
TE 292.2 K  
D0 0.00013130 sec  
D1 2.00000000 sec  
D8 0.60000002 sec  
IN0 0.00030080 sec

==== CHANNEL f1 =====  
NUC1 1H  
P1 15.00 usec  
PL1 10.30 dB  
SFO1 400.1317028 MHz

F1 - Acquisition parameters  
TD 128  
SFO1 400.1317 MHz  
FIDRES 51.944813 Hz  
SW 8.308 ppm  
FnMODE States-TPPI

F2 - Processing parameters  
SI 1024  
SF 400.1300070 MHz  
WDW QSINE  
SSB 2  
LB 0 Hz  
GB 0  
PC 1.00

F1 - Processing parameters  
SI 1024  
MC2 States-TPPI  
SF 400.1300109 MHz  
WDW QSINE  
SSB 2  
LB 0 Hz  
GB 0

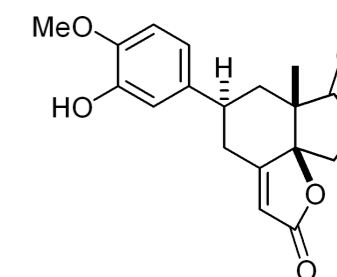

9

NOESY (acetone-d<sub>6</sub>)

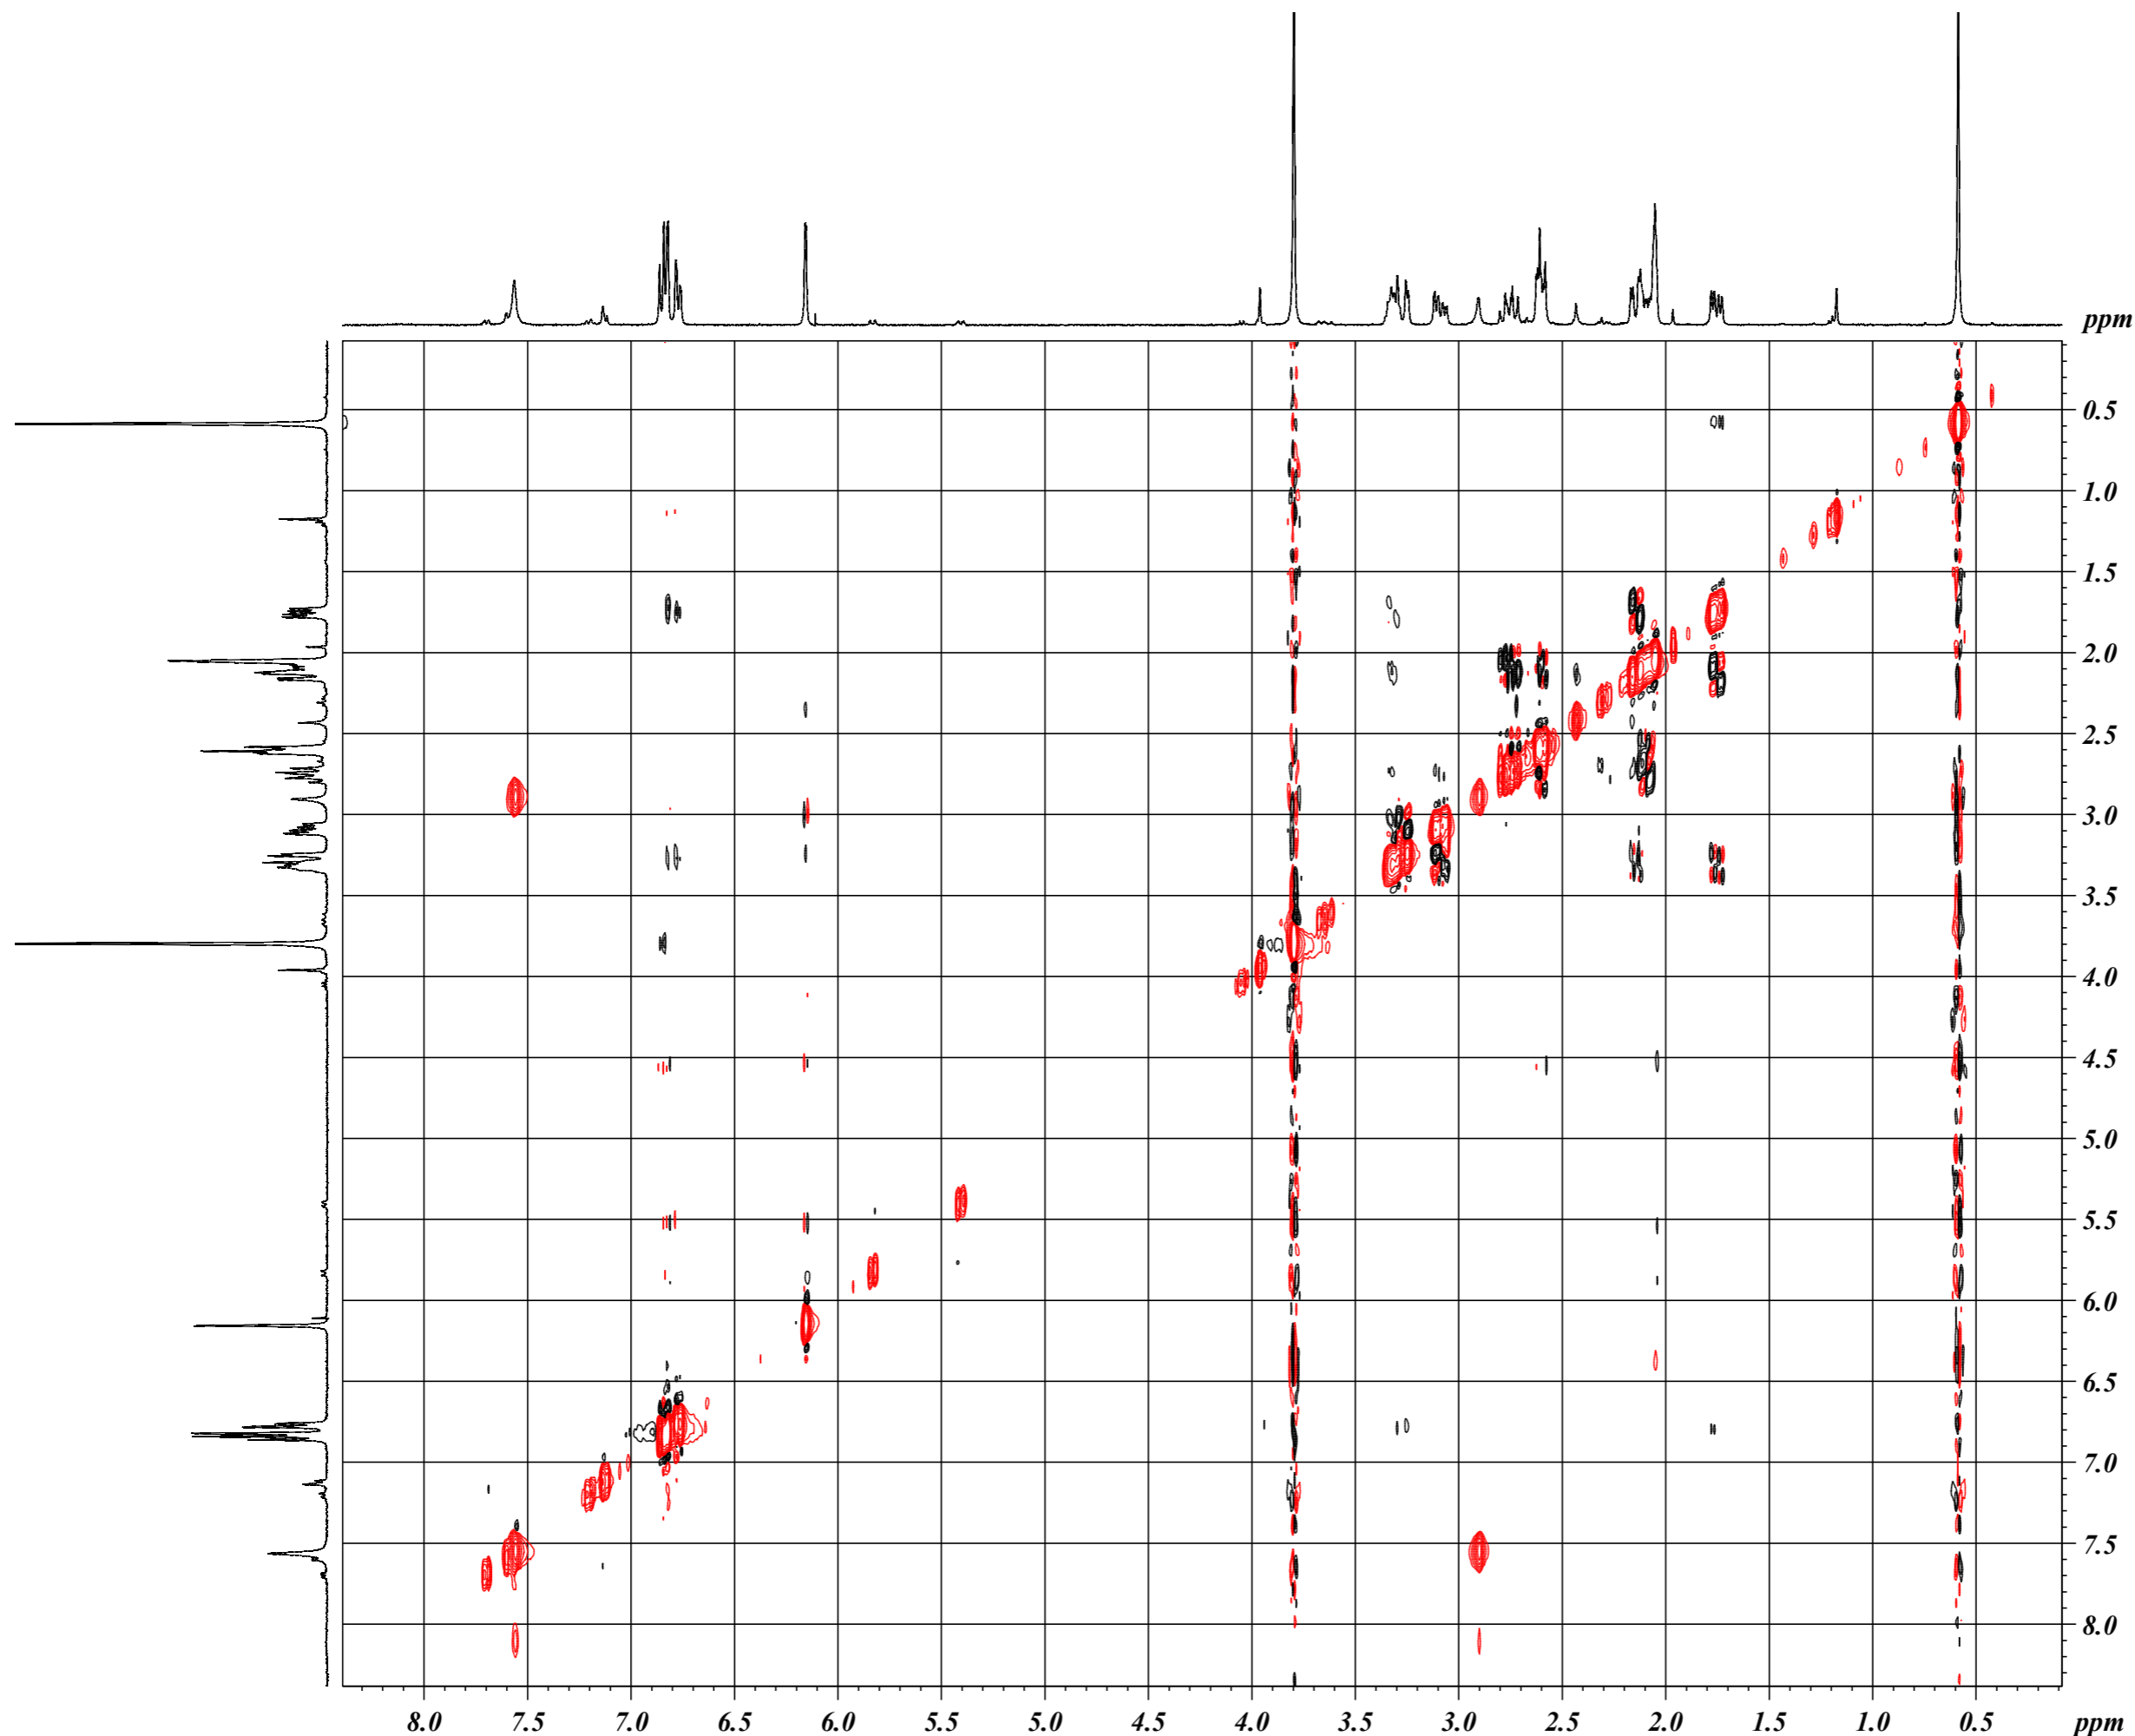

S22

Current Data Parameters  
 NAME kawaiB400  
 EXPNO 288  
 PROCNO 1

F2 - Acquisition Parameters  
 Date\_ 20201029  
 Time\_ 13.21  
 INSTRUM spect  
 PROBHD 5 mm QNP 1H/13  
 PULPROG zg30  
 TD 65536  
 SOLVENT CDCl3  
 NS 16  
 DS 2  
 SWH 8278.146 Hz  
 FIDRES 0.126314 Hz  
 AQ 3.9583745 sec  
 RG 161.3  
 DW 60.400 usec  
 DE 6.50 usec  
 TE 296.2 K  
 D1 1.0000000 sec  
 TD0 1

==== CHANNEL f1 =====  
 NUC1 1H  
 P1 15.00 usec  
 PL1 10.30 dB  
 SFO1 400.1324710 MHz

F2 - Processing parameters  
 SI 32768  
 SF 400.130092 MHz  
 WDW EM  
 SSB 0  
 LB 0.30 Hz  
 GB 0  
 PC 1.00

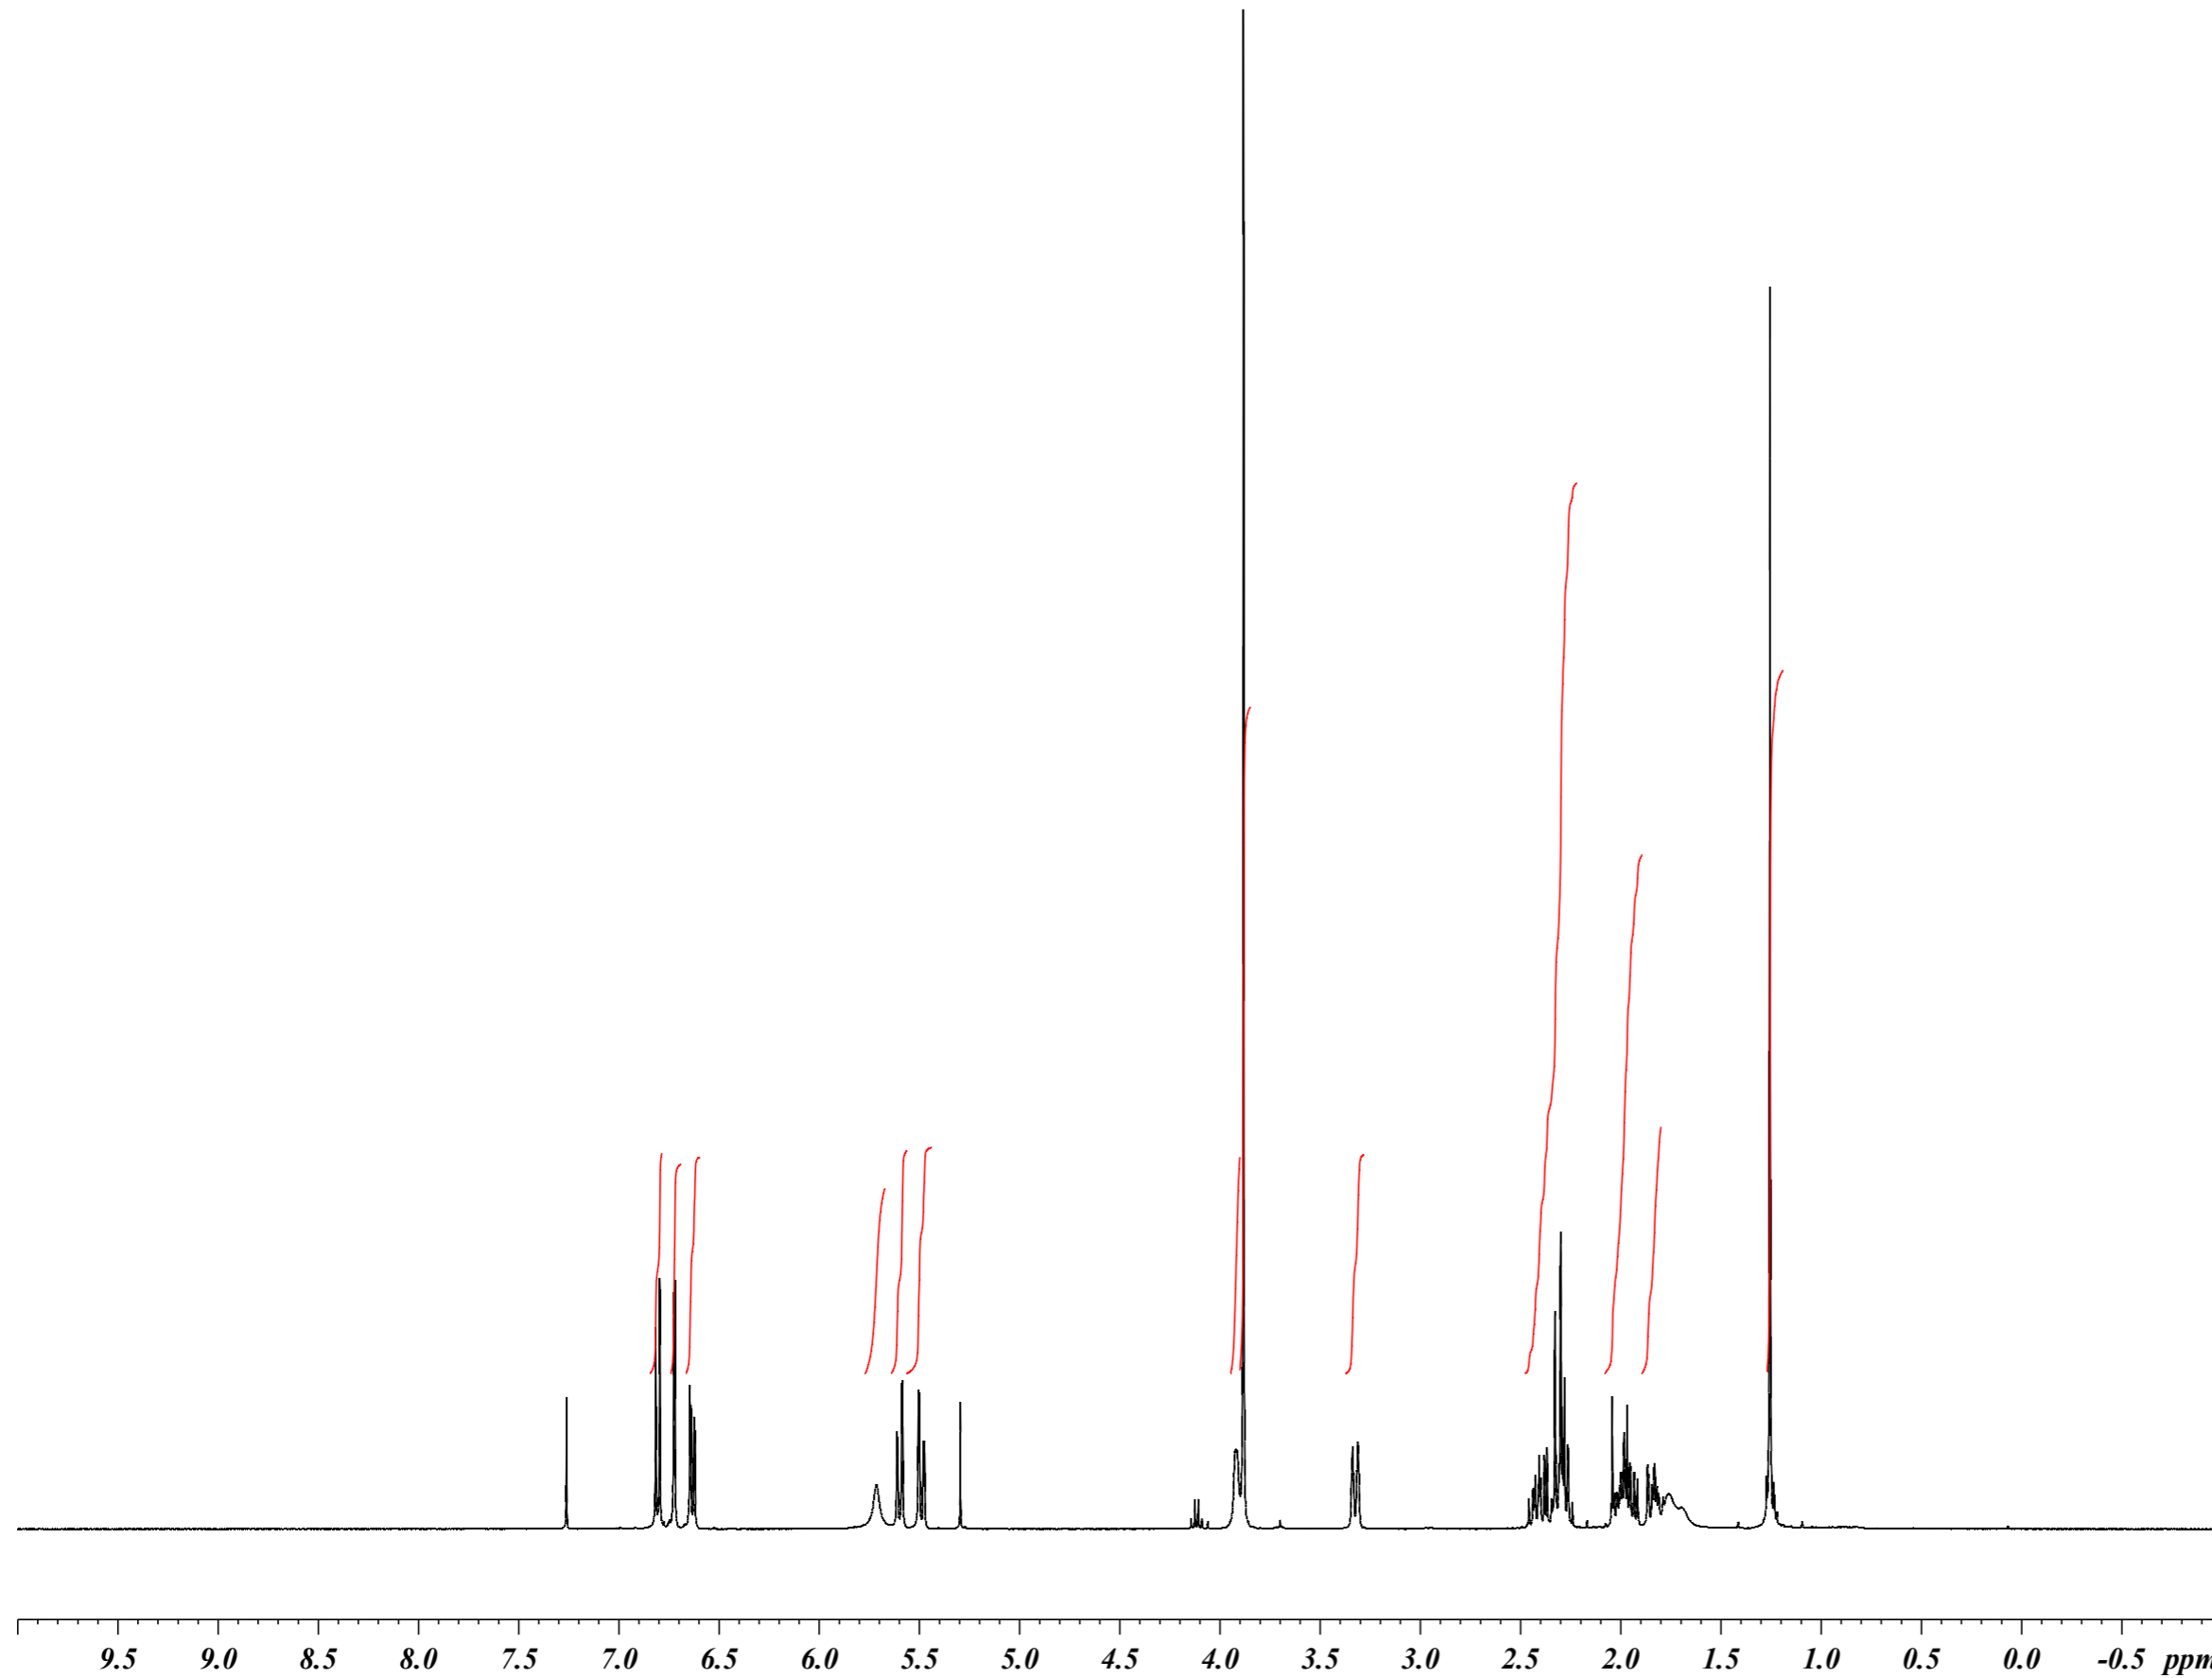

Integration values (from left to right):  
 1.004, 0.954, 0.986, 0.843, 1.016, 1.031, 0.985, 3.041, 1.000, 4.062, 2.366, 1.126, 3.207

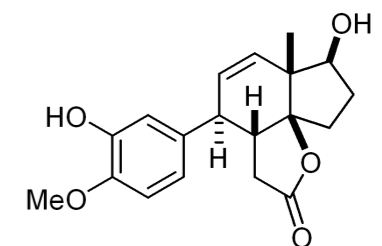

10

<sup>1</sup>H NMR (400 MHz, CDCl<sub>3</sub>)

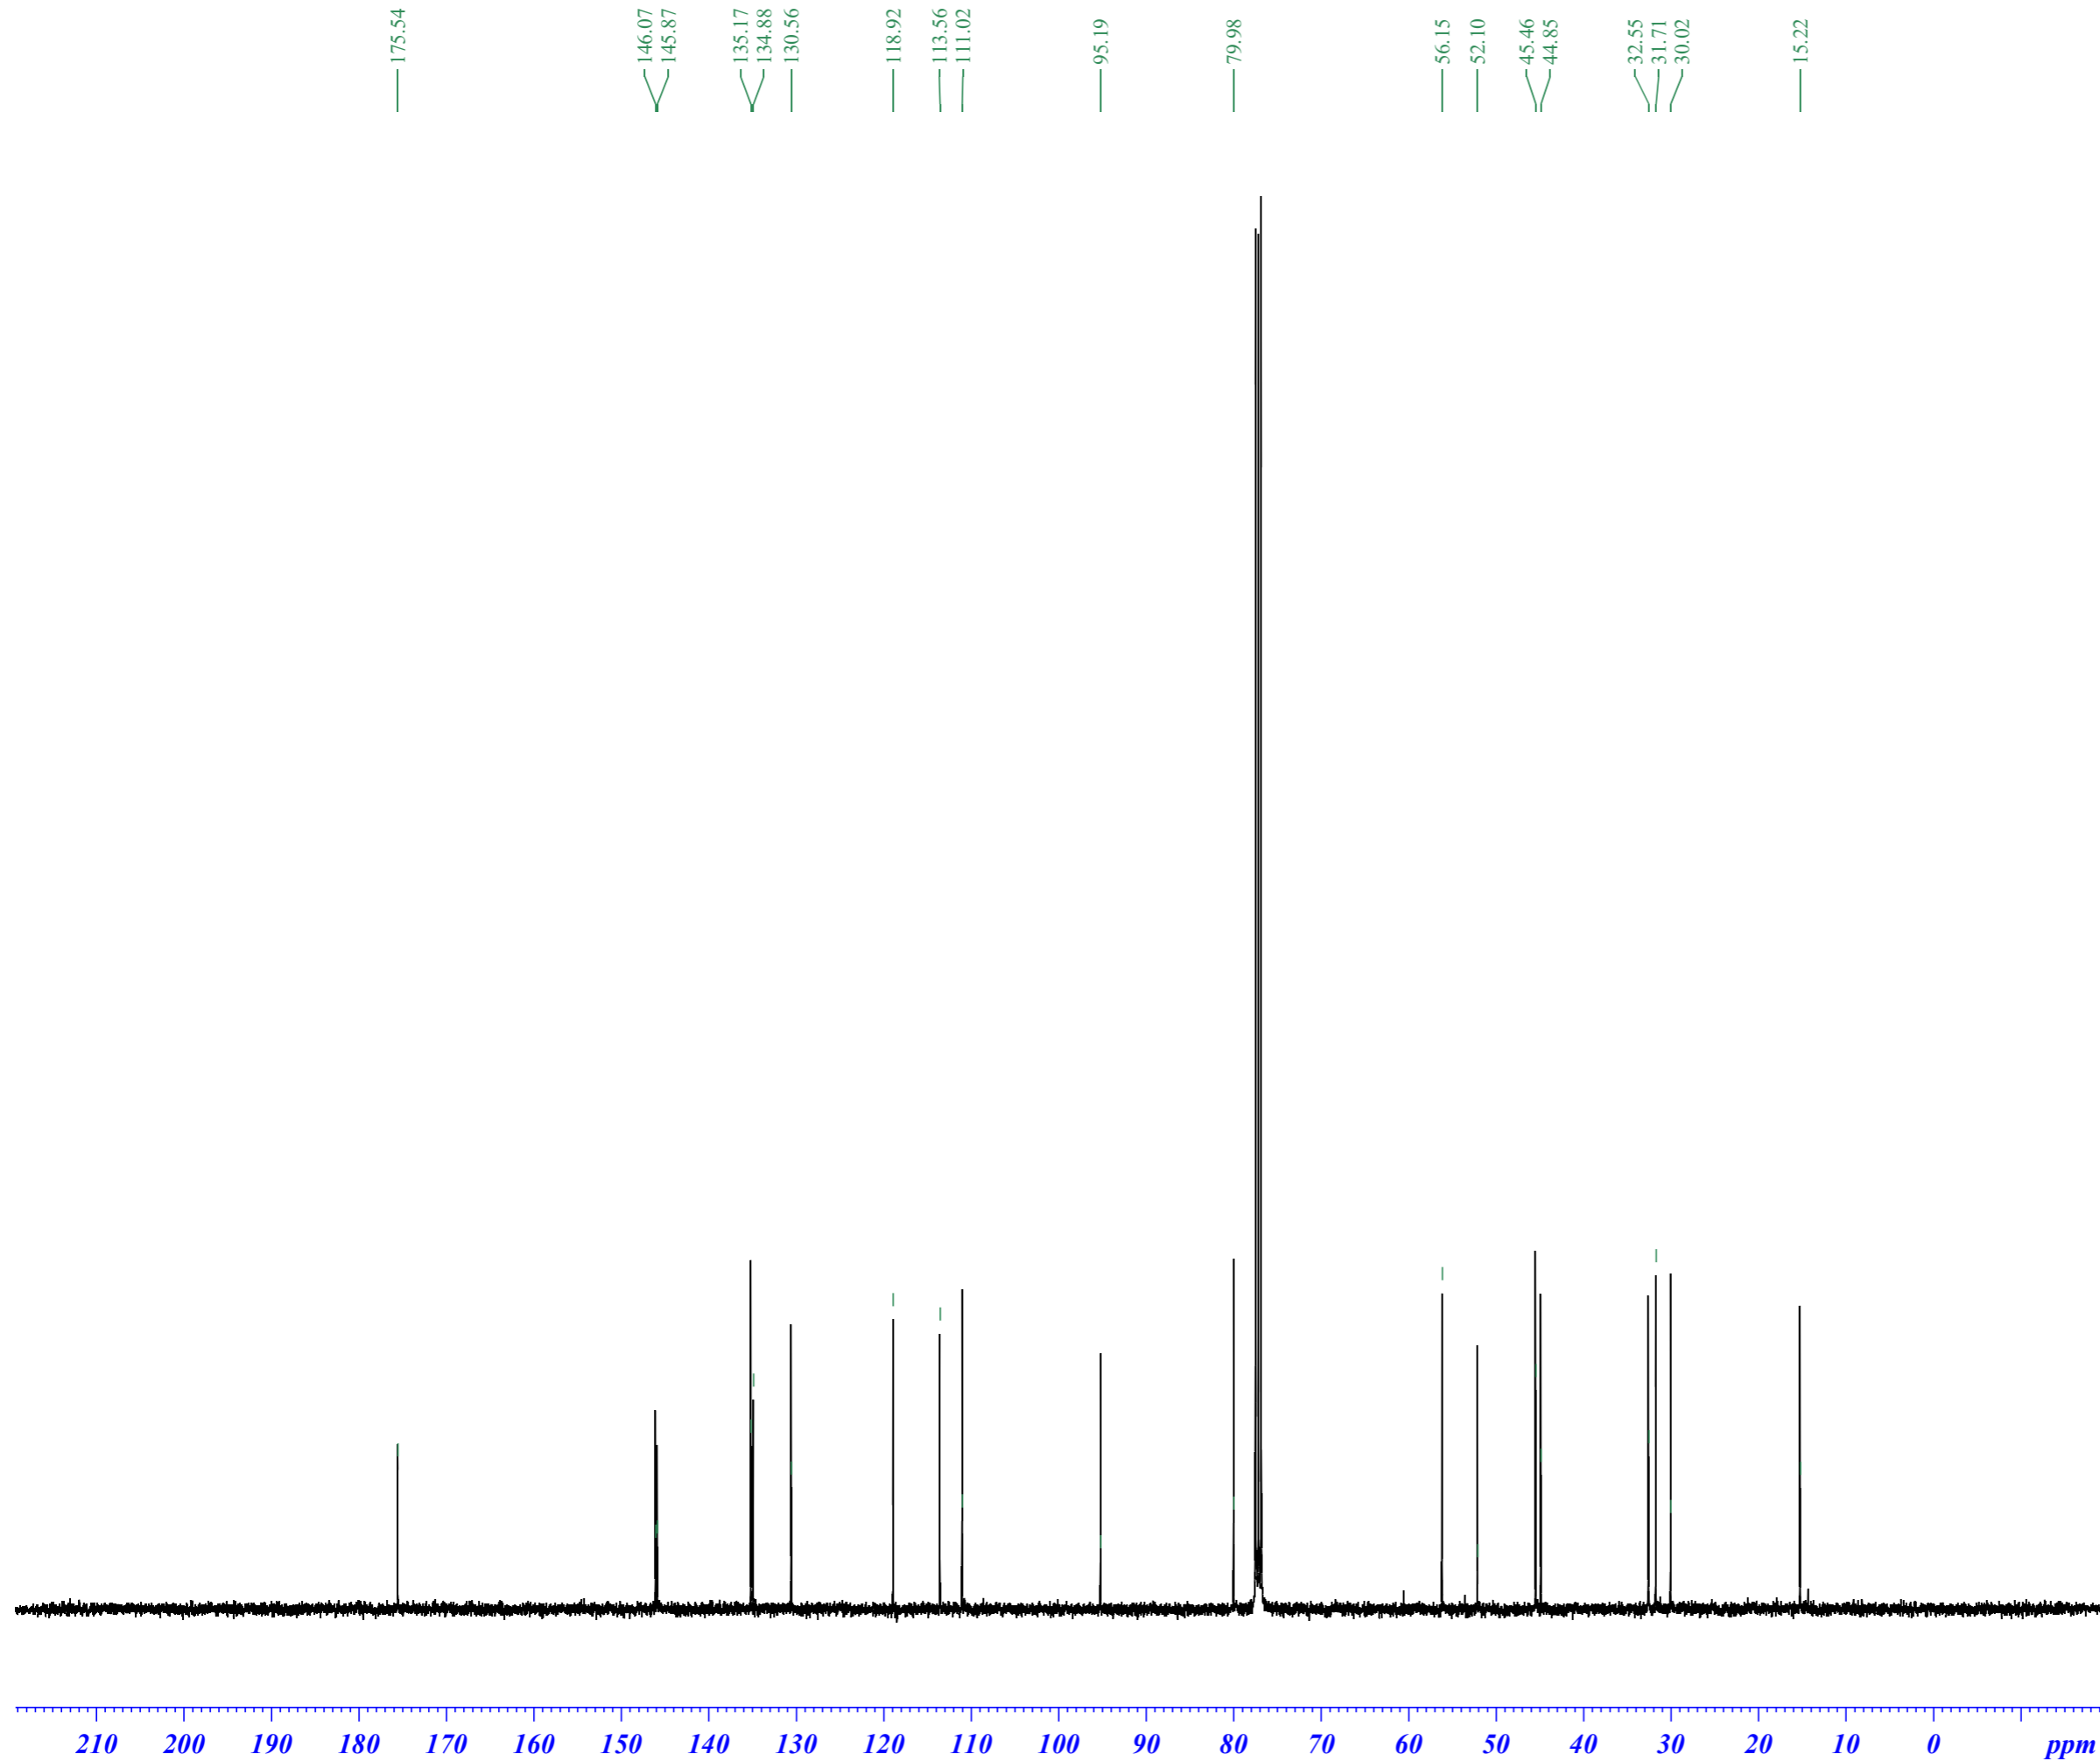

Current Data Parameters  
 NAME kawaiB400  
 EXPNO 289  
 PROCNO 1

F2 - Acquisition Parameters  
 Date\_ 20201029  
 Time 14.20  
 INSTRUM spect  
 PROBHD 5 mm QNP 1H/13  
 PULPROG zgpg30  
 TD 65536  
 SOLVENT CDCl3  
 NS 1000  
 DS 4  
 SWH 23980.814 Hz  
 FIDRES 0.365918 Hz  
 AQ 1.3664256 sec  
 RG 2580.3  
 DW 20.850 usec  
 DE 6.50 usec  
 TE 297.2 K  
 D1 2.00000000 sec  
 D11 0.03000000 sec  
 TD0 1

==== CHANNEL f1 =====  
 NUC1 13C  
 P1 12.00 usec  
 PL1 7.50 dB  
 SFO1 100.6228298 MHz

==== CHANNEL f2 =====  
 CPDPRG[2] waltz16  
 NUC2 1H  
 PCPD2 80.00 usec  
 PL2 10.30 dB  
 PL12 25.00 dB  
 PL13 25.00 dB  
 SFO2 400.1316005 MHz

F2 - Processing parameters  
 SI 32768  
 SF 100.6127584 MHz  
 WDW EM  
 SSB 0  
 LB 1.00 Hz  
 GB 0  
 PC 1.40

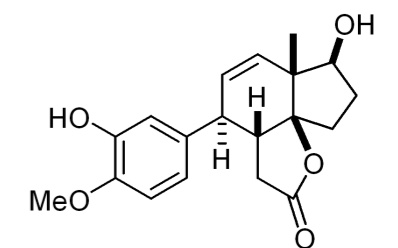

10

<sup>13</sup>C NMR (100 MHz, CDCl<sub>3</sub>)



Current Data Parameters  
NAME kawaiB400  
EXPNO 352  
PROCNO 1

F2 - Acquisition Parameters  
Date\_ 20210106  
Time 12.20  
INSTRUM spect  
PROBHD 5 mm QNP 1H/13  
PULPROG noesyph  
TD 2048  
SOLVENT CDC13  
NS 24  
DS 2  
SWH 3188.775 Hz  
FIDRES 1.557019 Hz  
AQ 0.3211264 sec  
RG 812.7  
DW 156.800 usec  
DE 6.50 usec  
TE 294.2 K  
D0 0.00013770 sec  
D1 2.00000000 sec  
D8 0.60000002 sec  
IN0 0.00031360 sec

==== CHANNEL f1 =====  
NUC1 1H  
P1 15.00 usec  
PL1 10.30 dB  
SFO1 400.1317065 MHz

F1 - Acquisition parameters  
TD 128  
SFO1 400.1317 MHz  
FIDRES 49.824306 Hz  
SW 7.969 ppm  
FnMODE States-TPPI

F2 - Processing parameters  
SI 1024  
SF 400.1300097 MHz  
WDW QSINE  
SSB 2  
LB 0 Hz  
GB 0  
PC 1.00

F1 - Processing parameters  
SI 1024  
MC2 States-TPPI  
SF 400.1300071 MHz  
WDW QSINE  
SSB 2  
LB 0 Hz  
GB 0

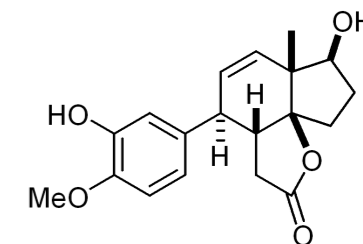

**10**  
NOESY (CDCl<sub>3</sub>)

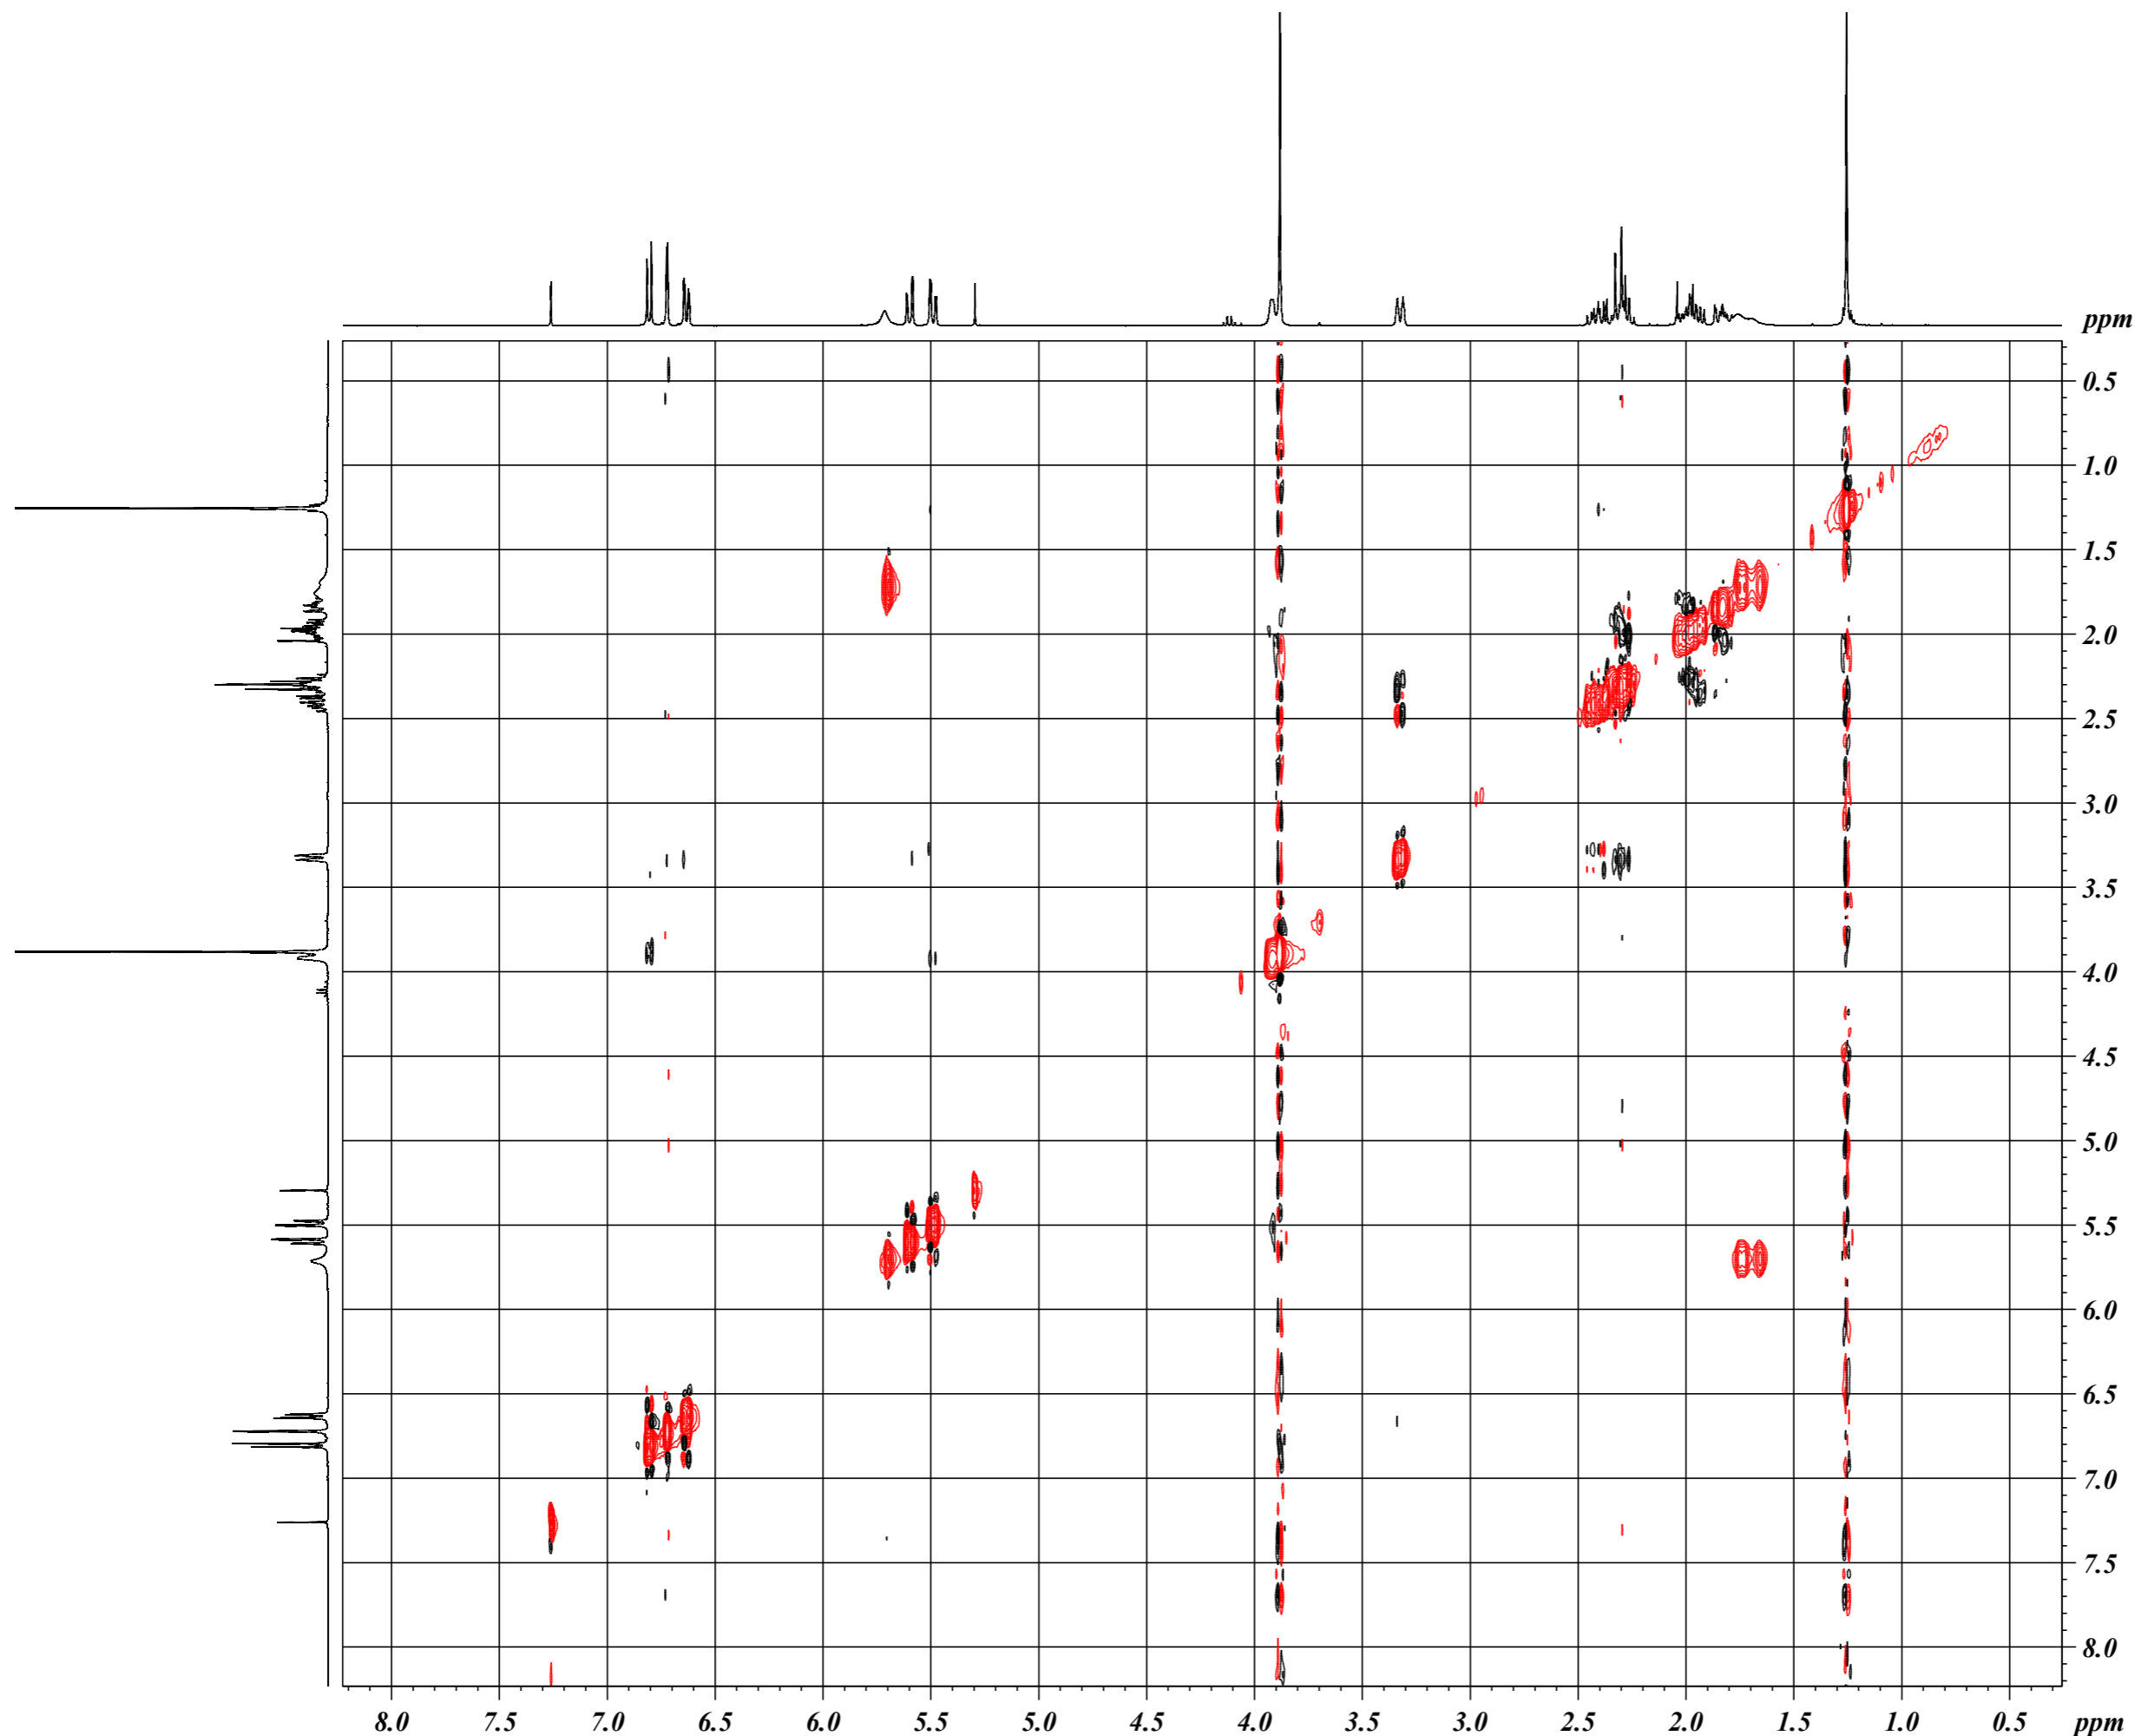

Current Data Parameters  
 NAME kawaiB400  
 EXPNO 255  
 PROCNO 1

F2 - Acquisition Parameters  
 Date\_ 20200825  
 Time\_ 15.21  
 INSTRUM spect  
 PROBHD 5 mm QNP 1H/13  
 PULPROG zg30  
 TD 65536  
 SOLVENT CDCl3  
 NS 8  
 DS 2  
 SWH 8278.146 Hz  
 FIDRES 0.126314 Hz  
 AQ 3.9583745 sec  
 RG 35.9  
 DW 60.400 usec  
 DE 6.50 usec  
 TE 297.2 K  
 D1 1.0000000 sec  
 TD0 1

==== CHANNEL f1 =====  
 NUC1 1H  
 P1 15.00 usec  
 PL1 10.30 dB  
 SFO1 400.1324710 MHz

F2 - Processing parameters  
 SI 32768  
 SF 400.130095 MHz  
 WDW EM  
 SSB 0  
 LB 0.30 Hz  
 GB 0  
 PC 1.00

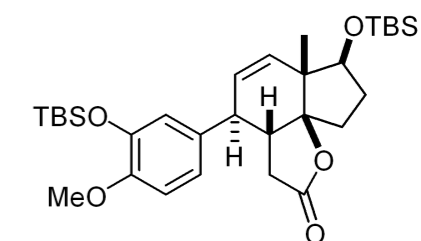

11

<sup>1</sup>H NMR (400 MHz, CDCl<sub>3</sub>)

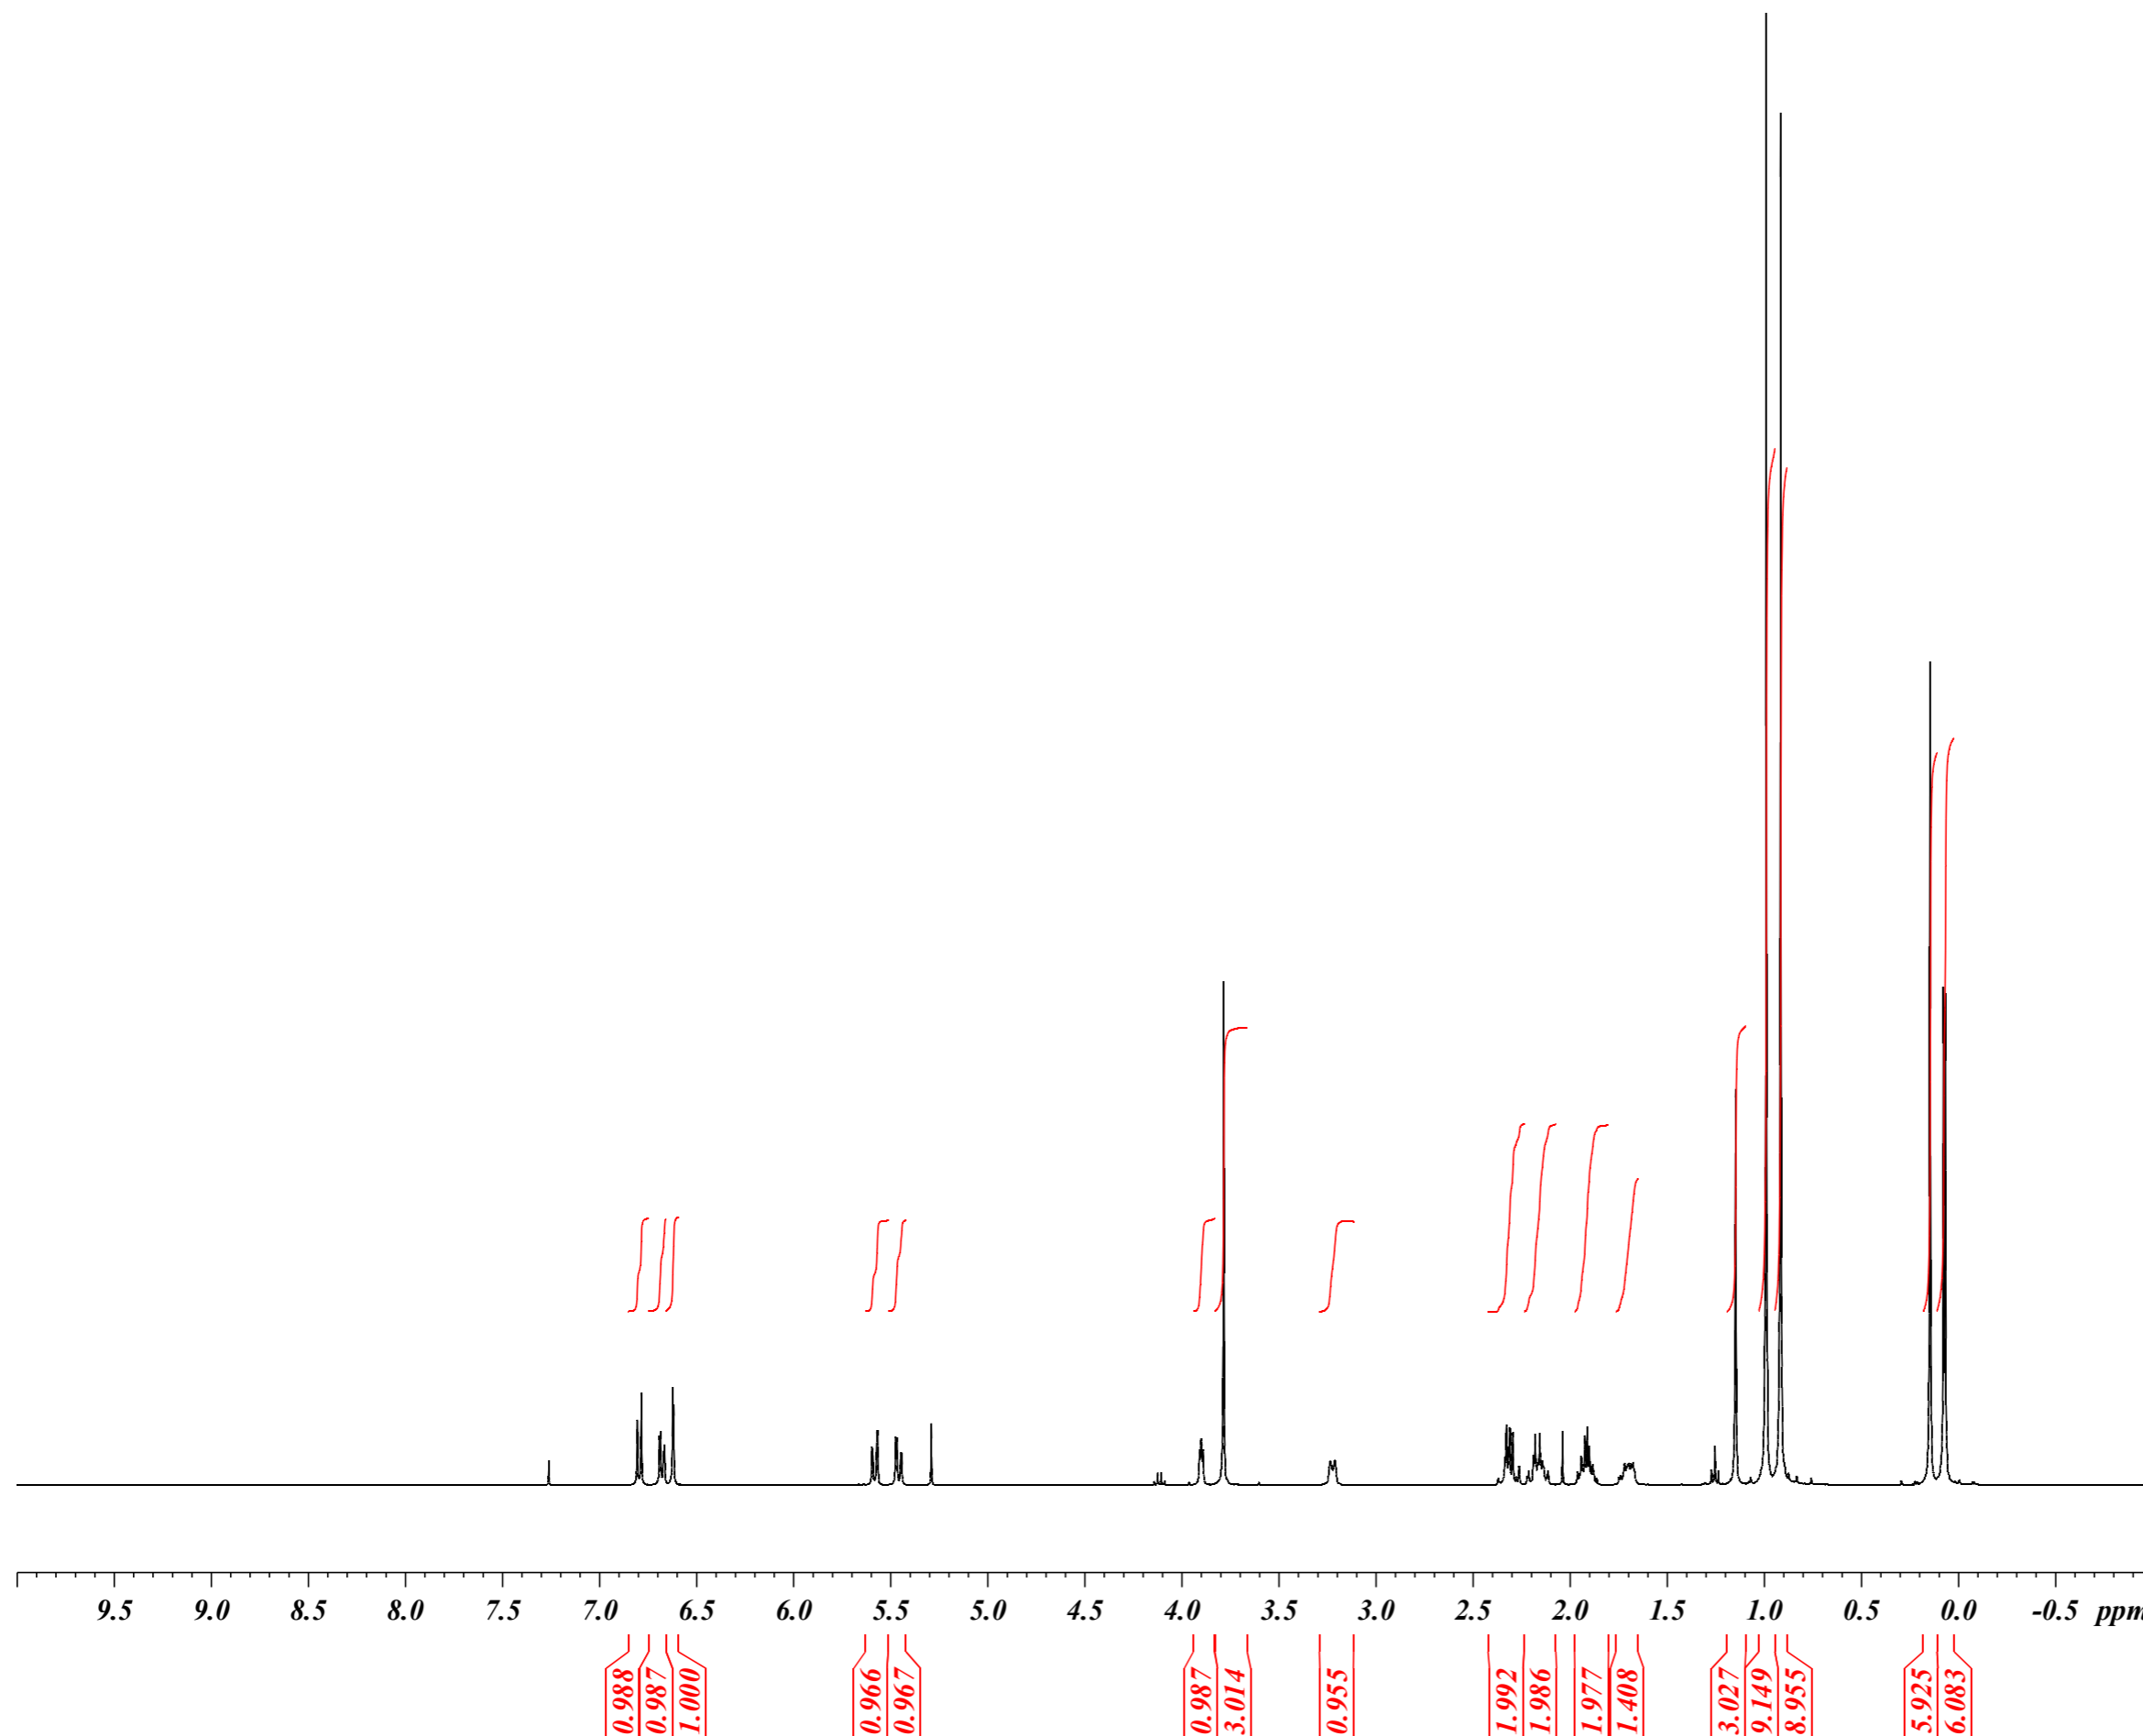

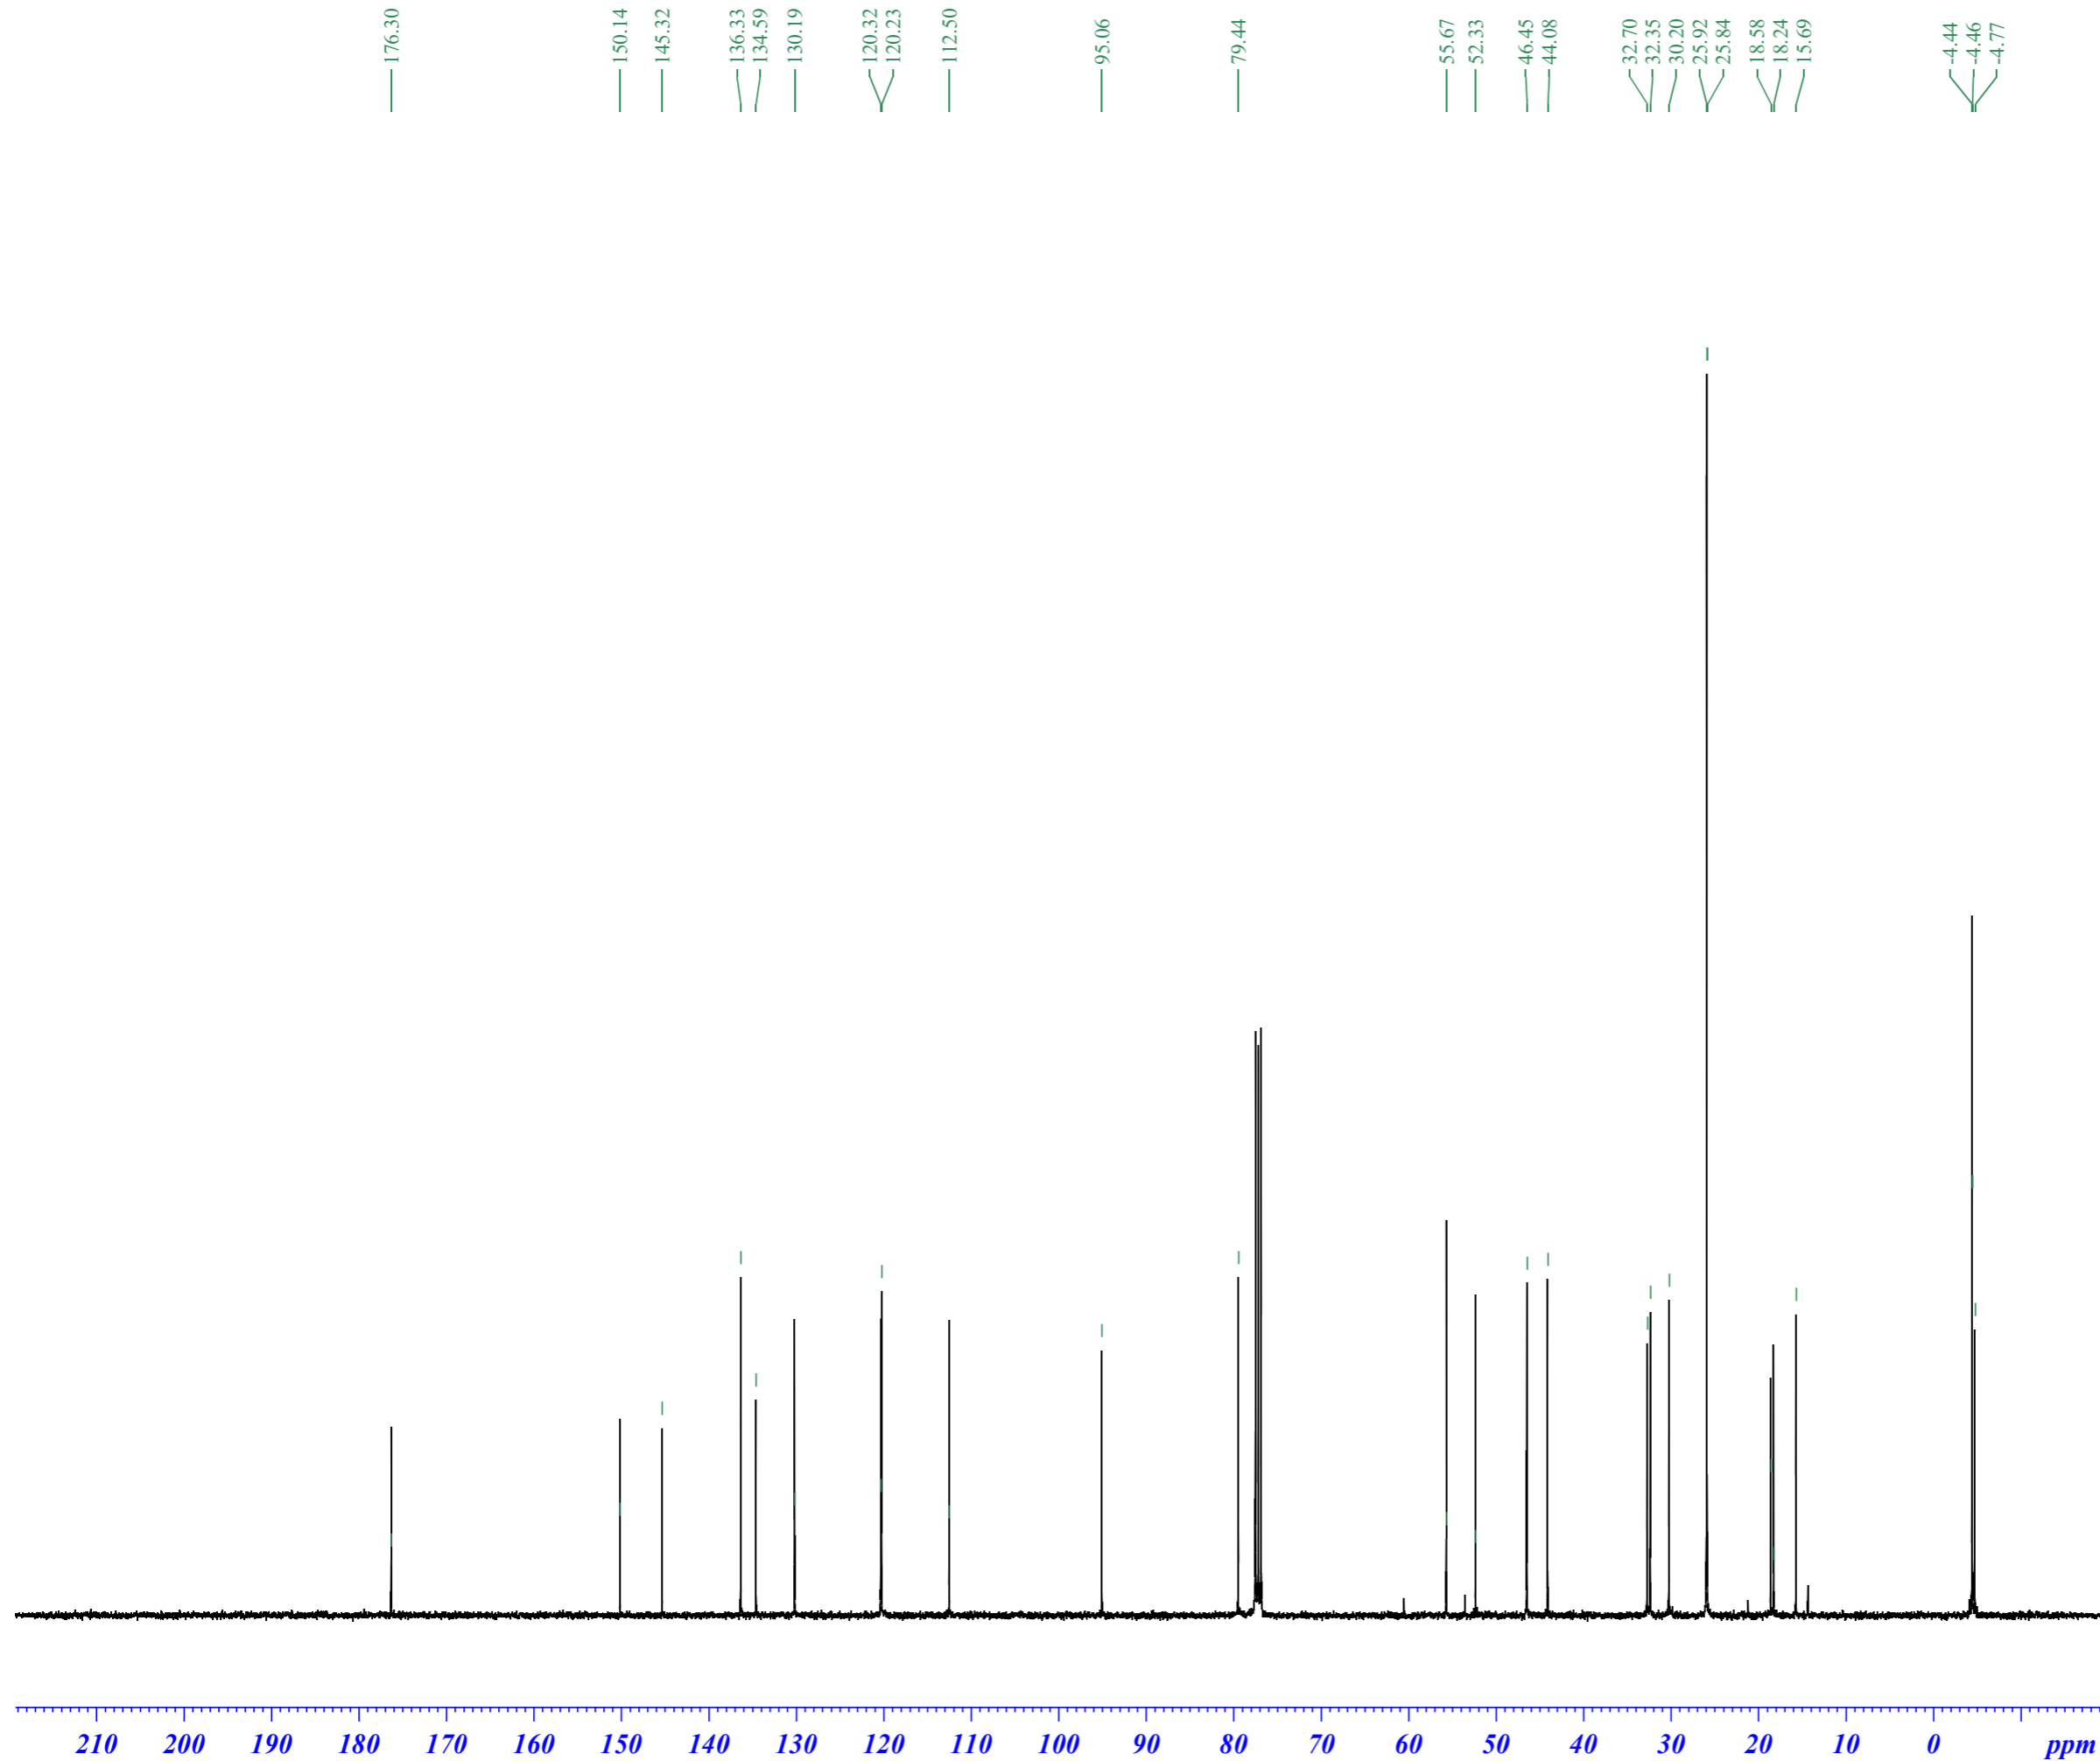

Current Data Parameters  
 NAME kawaiB400  
 EXPNO 256  
 PROCNO 1

F2 - Acquisition Parameters  
 Date\_ 20200825  
 Time\_ 16.20  
 INSTRUM spect  
 PROBHD 5 mm QNP 1H/13  
 PULPROG zgpg30  
 TD 65536  
 SOLVENT CDCl3  
 NS 1000  
 DS 4  
 SWH 23980.814 Hz  
 FIDRES 0.365918 Hz  
 AQ 1.3664256 sec  
 RG 2048  
 DW 20.850 usec  
 DE 6.50 usec  
 TE 298.2 K  
 D1 2.00000000 sec  
 D11 0.03000000 sec  
 TD0 1

==== CHANNEL f1 =====  
 NUC1 13C  
 P1 12.00 usec  
 PL1 7.50 dB  
 SFO1 100.6228298 MHz

==== CHANNEL f2 =====  
 CPDPRG[2] waltz16  
 NUC2 1H  
 PCPD2 80.00 usec  
 PL2 10.30 dB  
 PL12 25.00 dB  
 PL13 25.00 dB  
 SFO2 400.1316005 MHz

F2 - Processing parameters  
 SI 32768  
 SF 100.6127578 MHz  
 WDW EM  
 SSB 0  
 LB 1.00 Hz  
 GB 0  
 PC 1.40

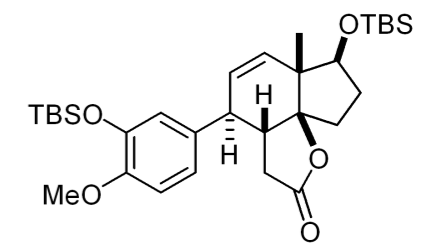

11

<sup>13</sup>C NMR (100 MHz, CDCl<sub>3</sub>)

Current Data Parameters  
 NAME kawaiB400  
 EXPNO 373  
 PROCNO 1

F2 - Acquisition Parameters  
 Date\_ 20210113  
 Time\_ 13.05  
 INSTRUM spect  
 PROBHD 5 mm QNP 1H/13  
 PULPROG zg30  
 TD 65536  
 SOLVENT CDCl3  
 NS 8  
 DS 2  
 SWH 8278.146 Hz  
 FIDRES 0.126314 Hz  
 AQ 3.9583745 sec  
 RG 1625.5  
 DW 60.400 usec  
 DE 6.50 usec  
 TE 293.2 K  
 D1 1.0000000 sec  
 TD0 1

==== CHANNEL f1 =====  
 NUC1 1H  
 P1 15.00 usec  
 PL1 10.30 dB  
 SFO1 400.1324710 MHz

F2 - Processing parameters  
 SI 32768  
 SF 400.130095 MHz  
 WDW EM  
 SSB 0  
 LB 0.30 Hz  
 GB 0  
 PC 1.00

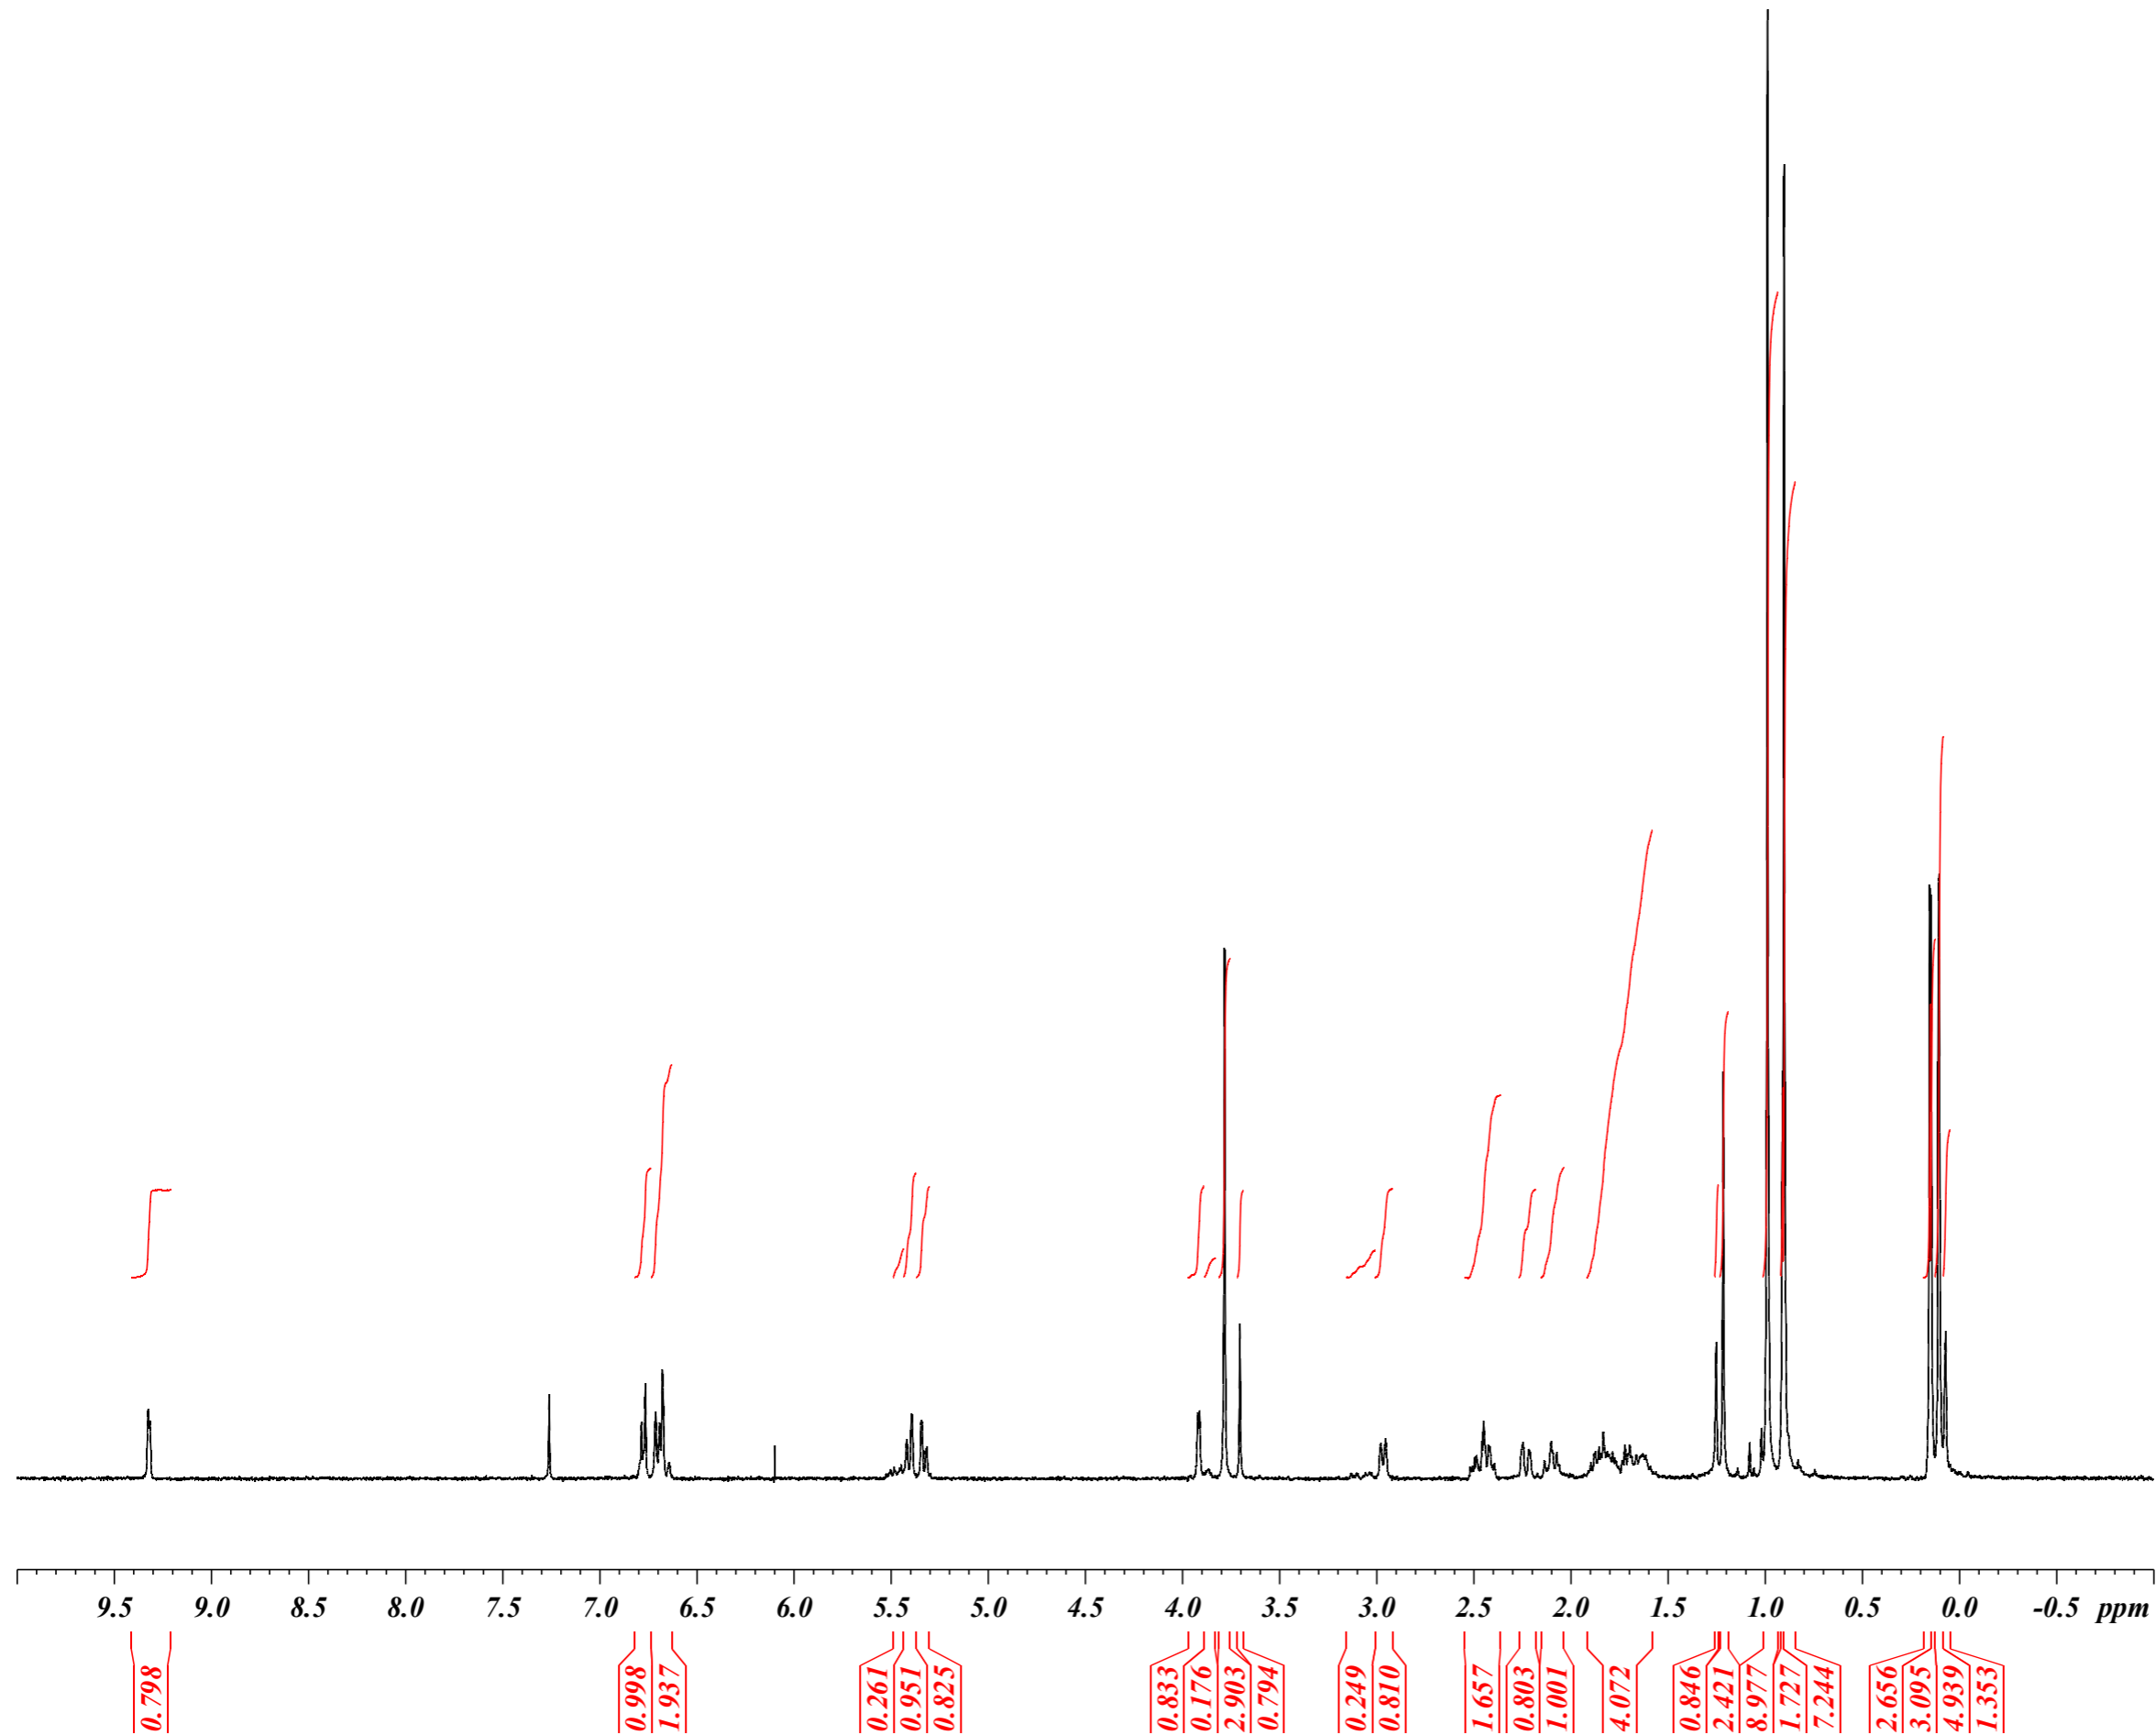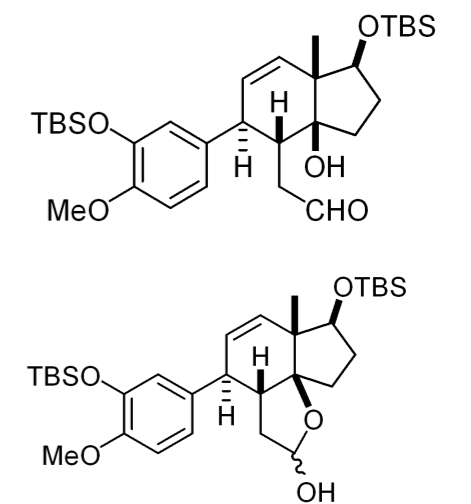

5 and 12

<sup>1</sup>H NMR (400 MHz, CDCl<sub>3</sub>)

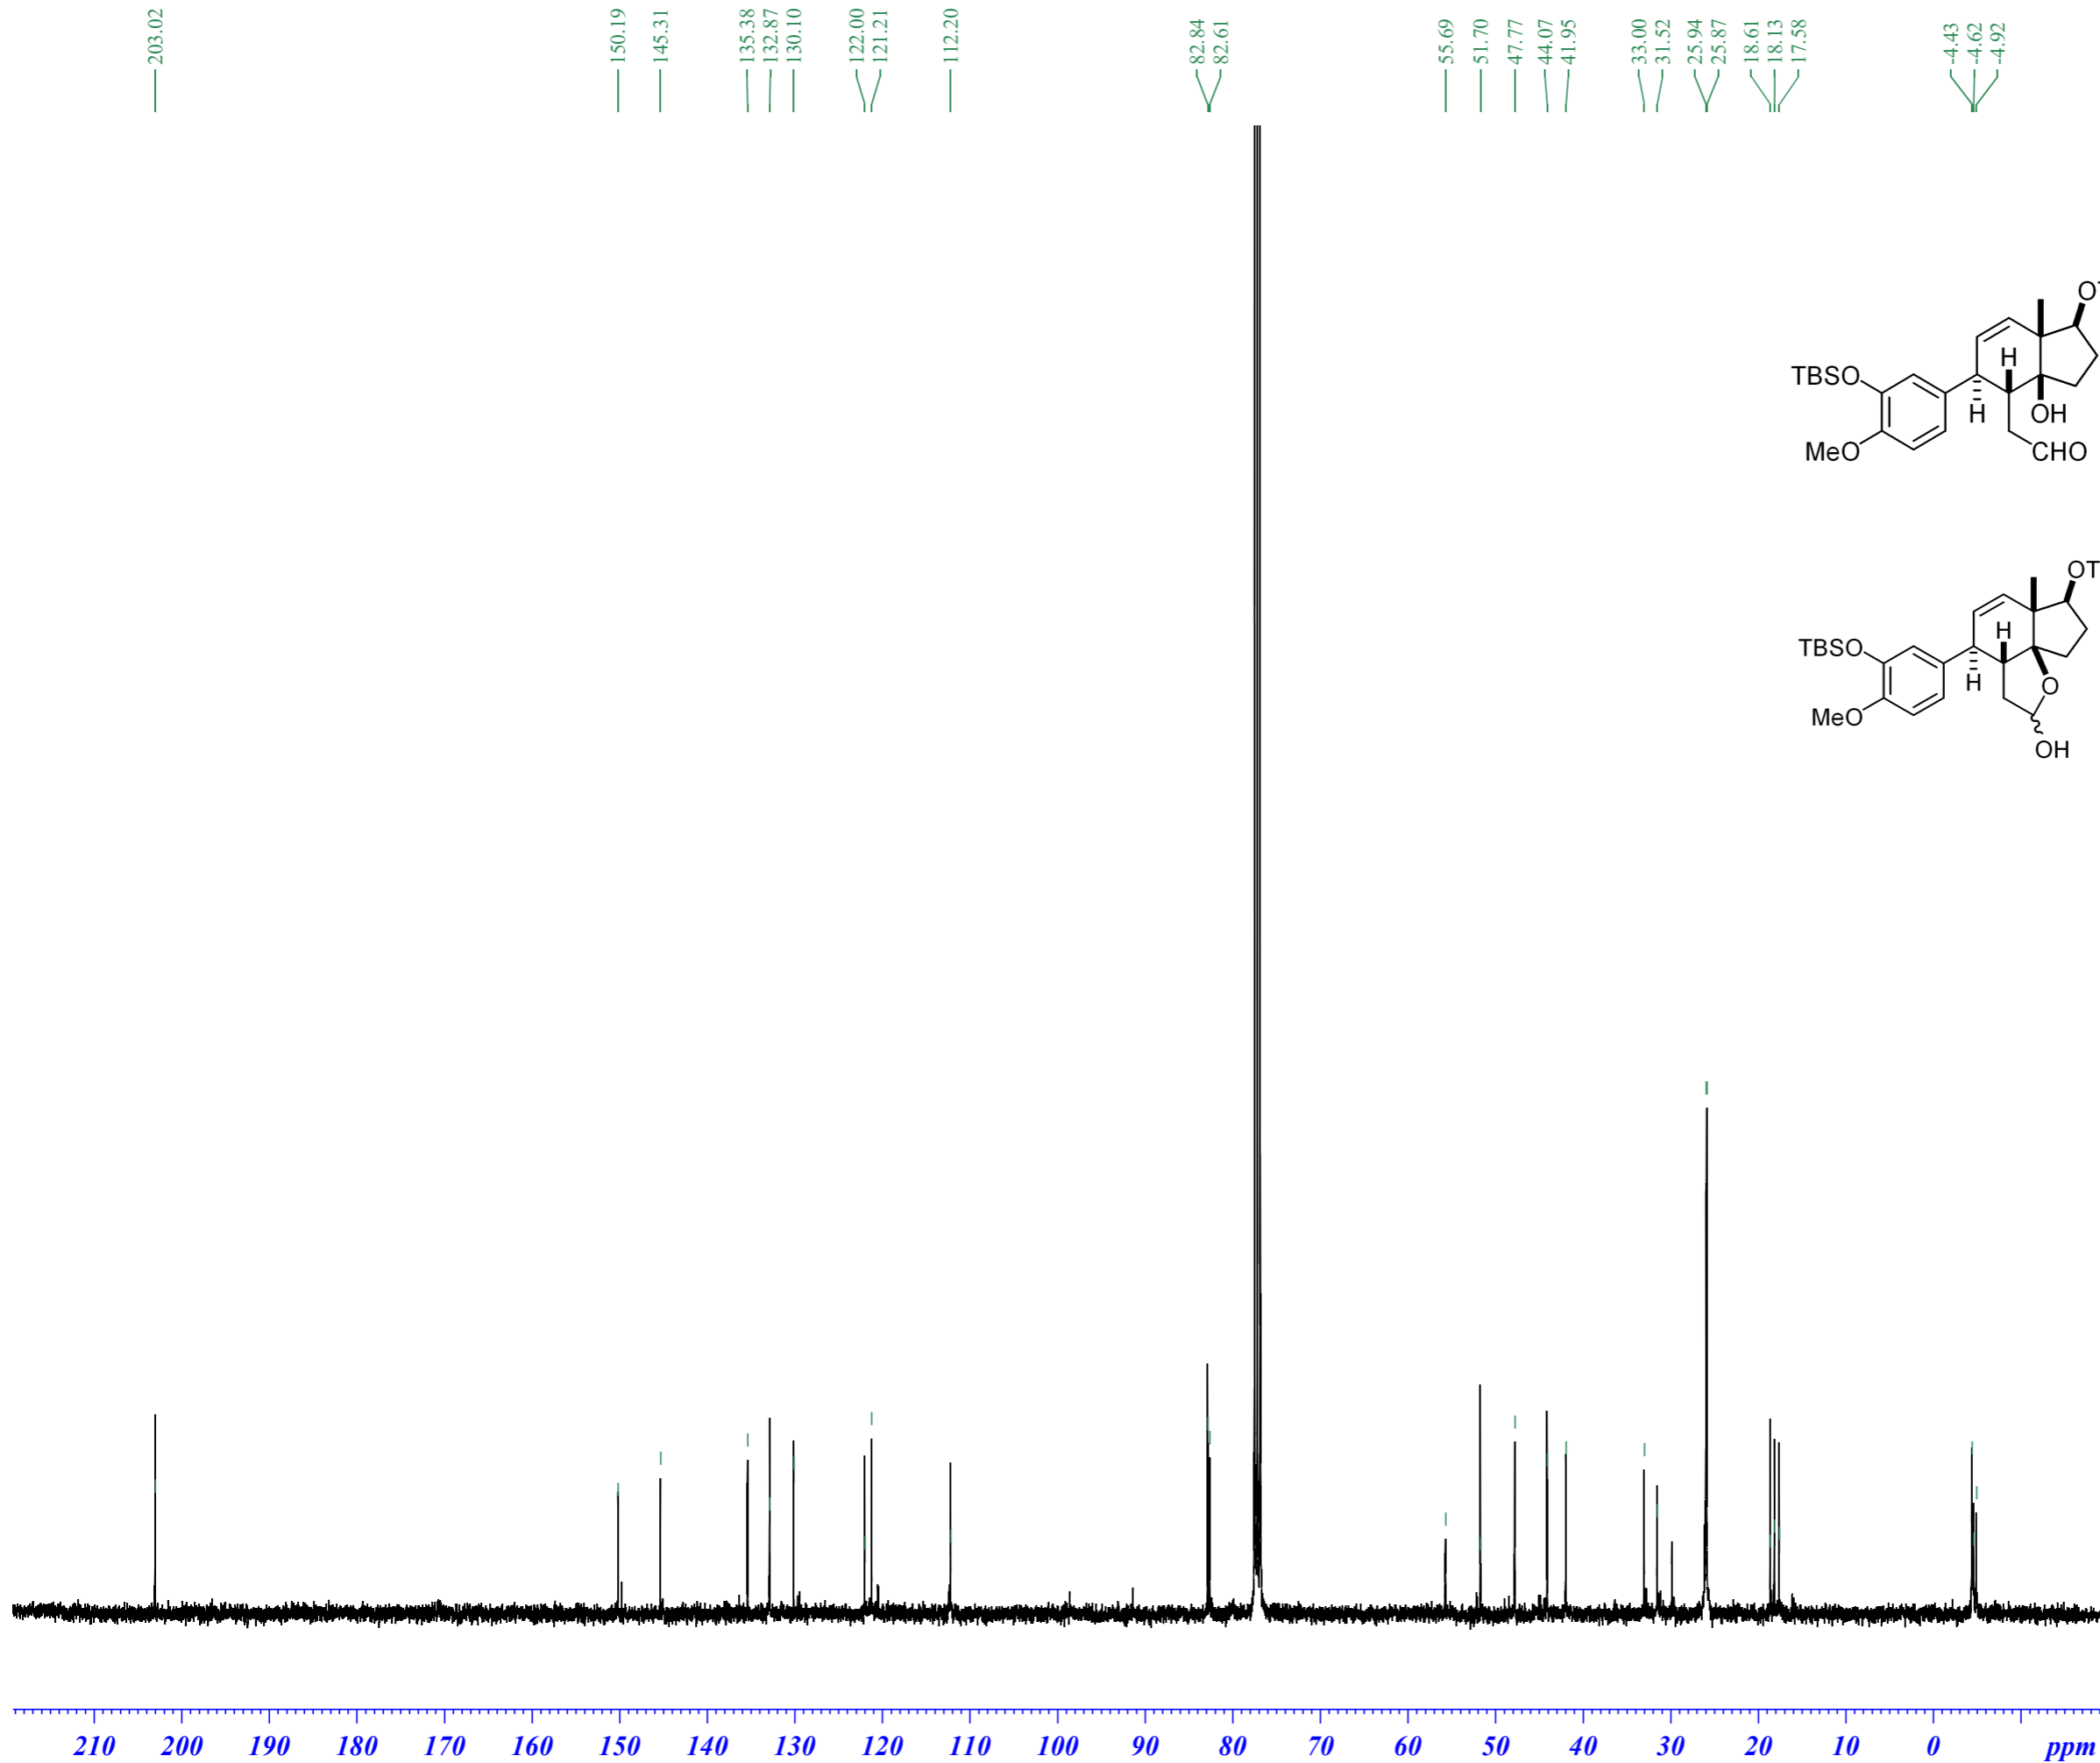

Current Data Parameters  
 NAME kawaiB400  
 EXPNO 374  
 PROCNO 1

F2 - Acquisition Parameters  
 Date\_ 20210113  
 Time\_ 14.53  
 INSTRUM spect  
 PROBHD 5 mm QNP 1H/13  
 PULPROG zgpg30  
 TD 65536  
 SOLVENT CDCl3  
 NS 2400  
 DS 4  
 SWH 23980.814 Hz  
 FIDRES 0.365918 Hz  
 AQ 1.3664256 sec  
 RG 5792.6  
 DW 20.850 usec  
 DE 6.50 usec  
 TE 294.2 K  
 D1 1.20000005 sec  
 D11 0.03000000 sec  
 TD0 1

==== CHANNEL f1 =====  
 NUC1 13C  
 P1 12.00 usec  
 PL1 7.50 dB  
 SFO1 100.6228298 MHz

==== CHANNEL f2 =====  
 CPDPRG[2] waltz16  
 NUC2 1H  
 PCPD2 90.00 usec  
 PL2 10.30 dB  
 PL12 20.00 dB  
 PL13 20.00 dB  
 SFO2 400.1316005 MHz

F2 - Processing parameters  
 SI 32768  
 SF 100.6127563 MHz  
 WDW EM  
 SSB 0  
 LB 1.00 Hz  
 GB 0  
 PC 1.40

5 and 12

<sup>13</sup>C NMR (100 MHz, CDCl<sub>3</sub>)

Current Data Parameters  
NAME kawaiB400  
EXPNO 388  
PROCNO 1

F2 - Acquisition Parameters  
Date\_ 20210121  
Time\_ 10.11 h  
INSTRUM spect  
PROBHD 5 mm QNP 1H/13  
PULPROG zg30  
TD 65536  
SOLVENT MeOD  
NS 128  
DS 2  
SWH 8278.146 Hz  
FIDRES 0.252629 Hz  
AQ 3.9583745 sec  
RG 645.1  
DW 60.400 usec  
DE 6.50 usec  
TE 294.4 K  
D1 1.0000000 sec  
TD0 1  
SFO1 400.1324710 MHz  
NUC1 1H  
P1 15.00 usec

F2 - Processing parameters  
SI 32768  
SF 400.1300075 MHz  
WDW EM  
SSB 0  
LB 0.30 Hz  
GB 0  
PC 1.00

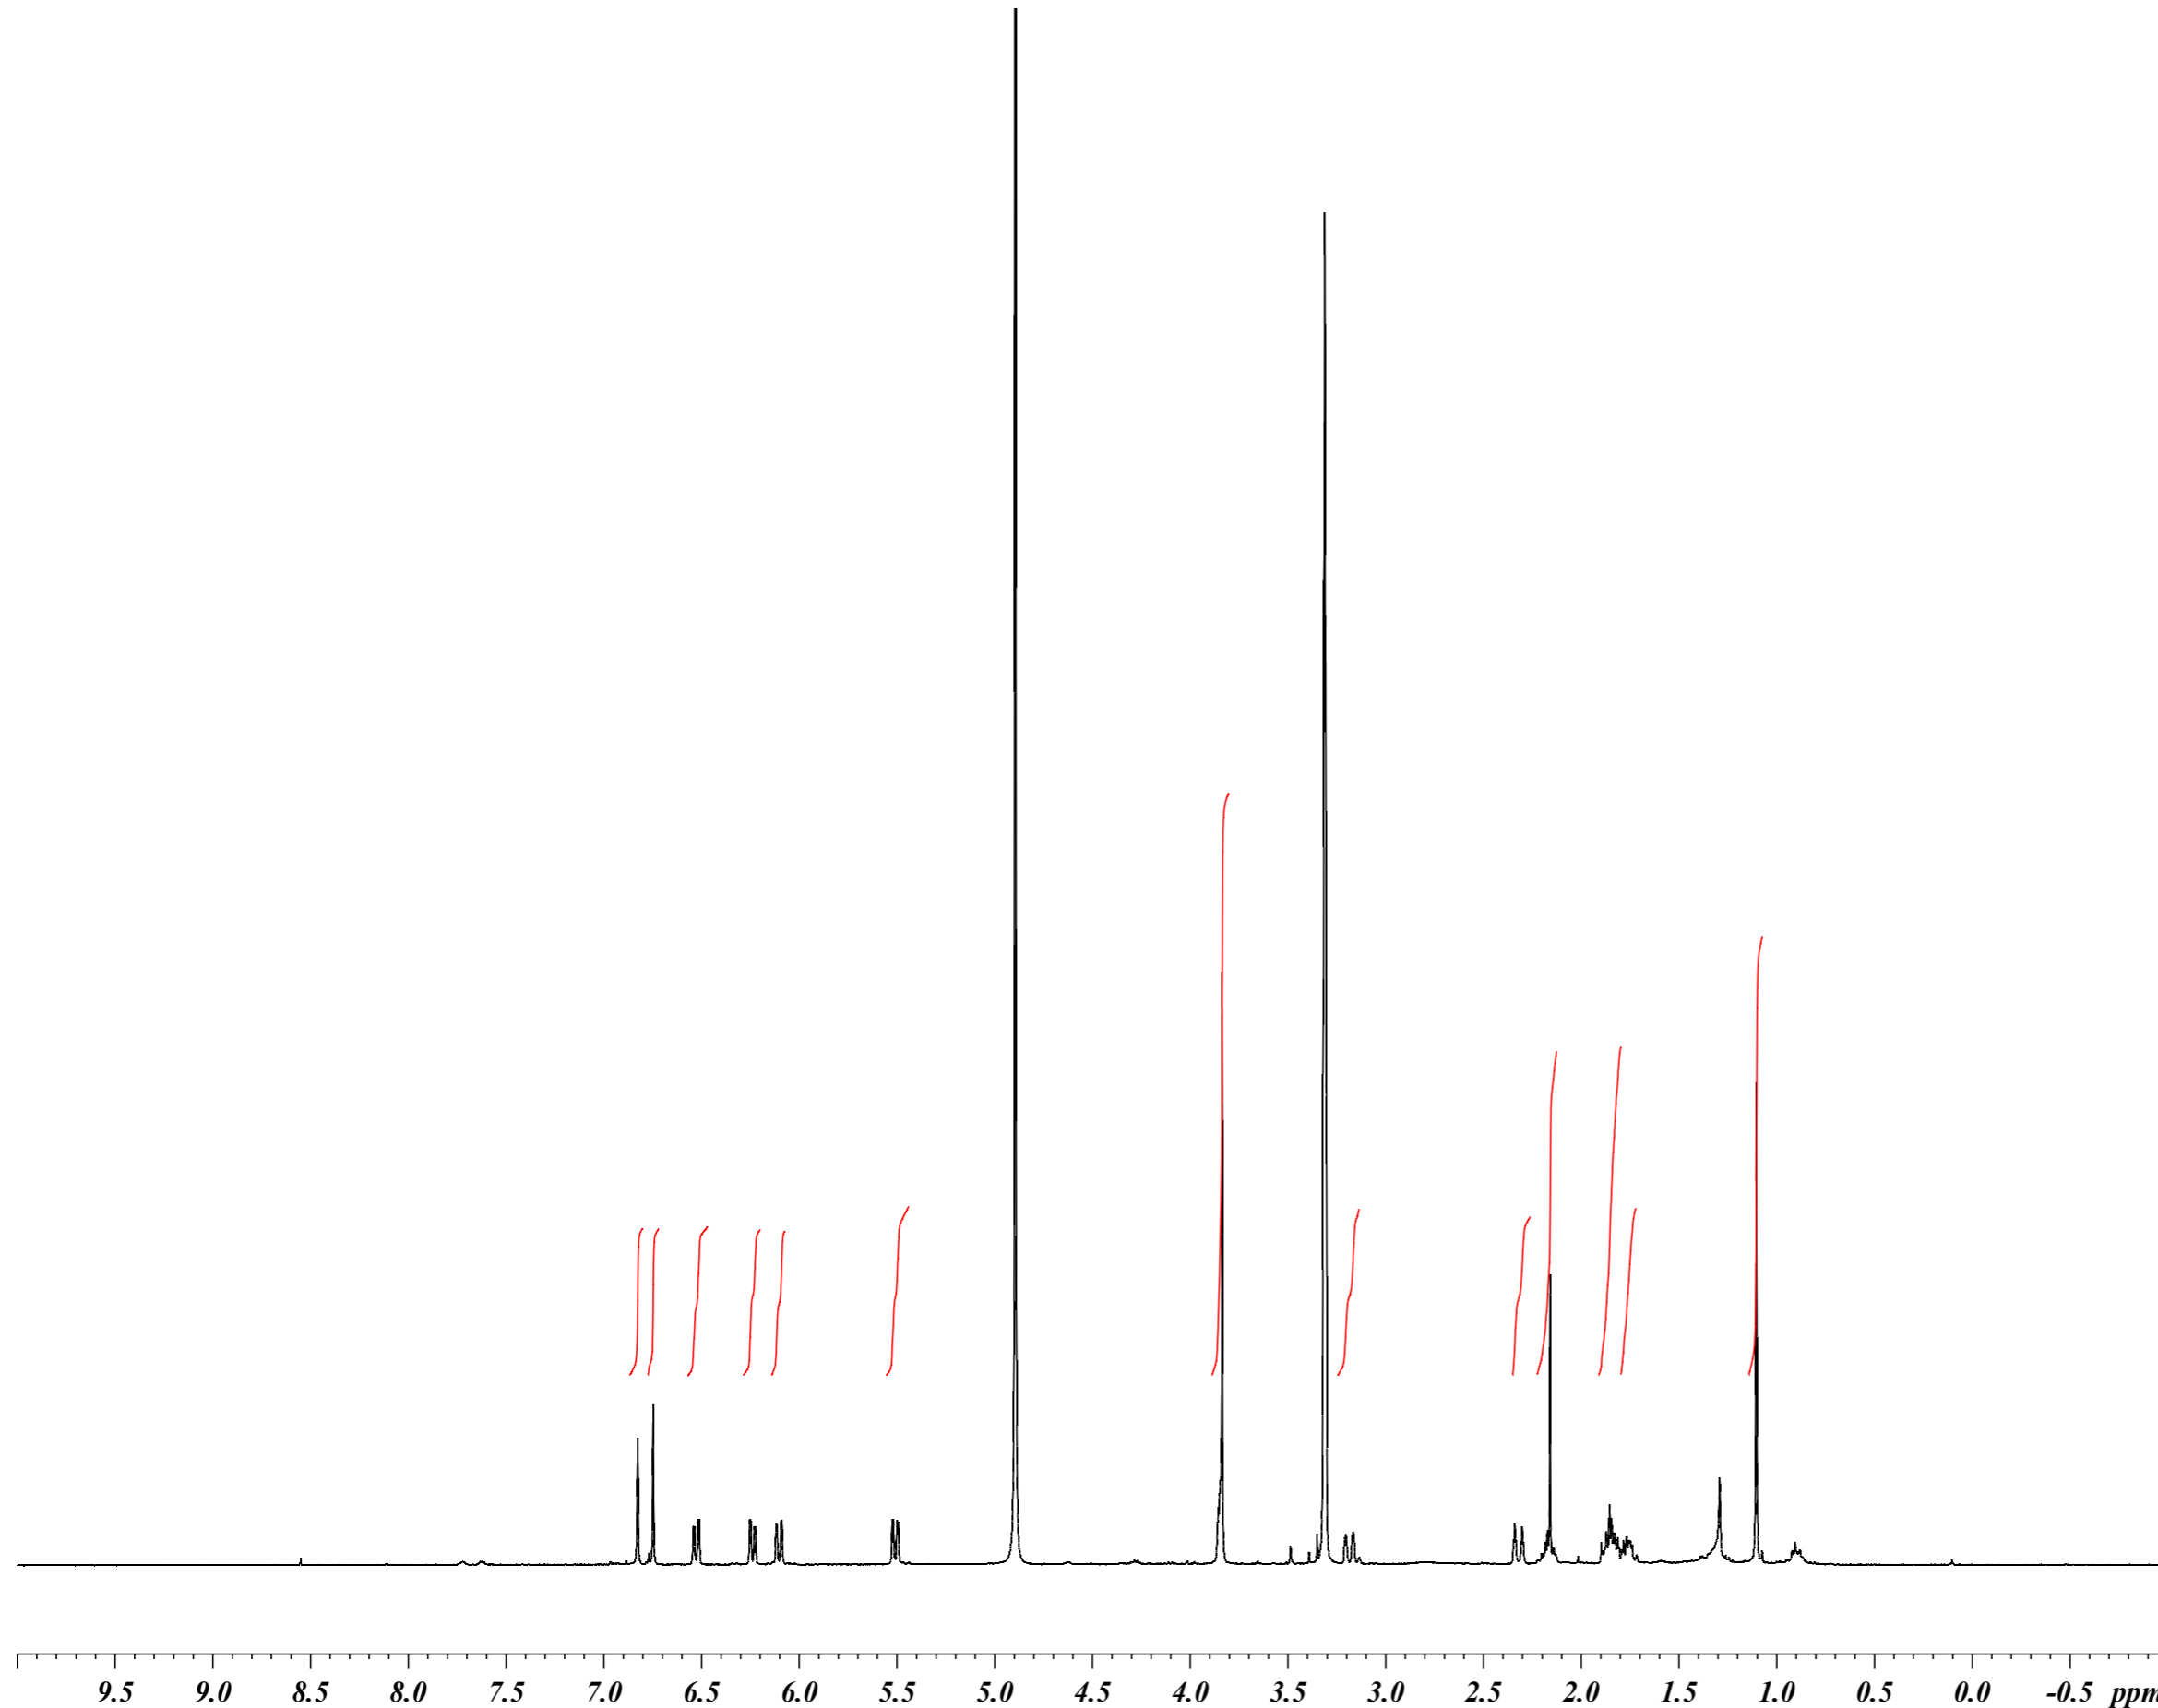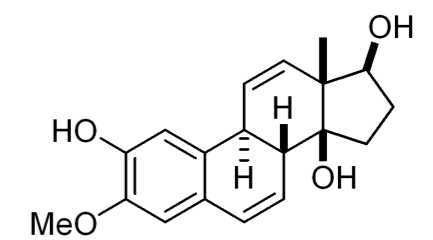

6

<sup>1</sup>H NMR (400 MHz, CD<sub>3</sub>OD)

[2088]

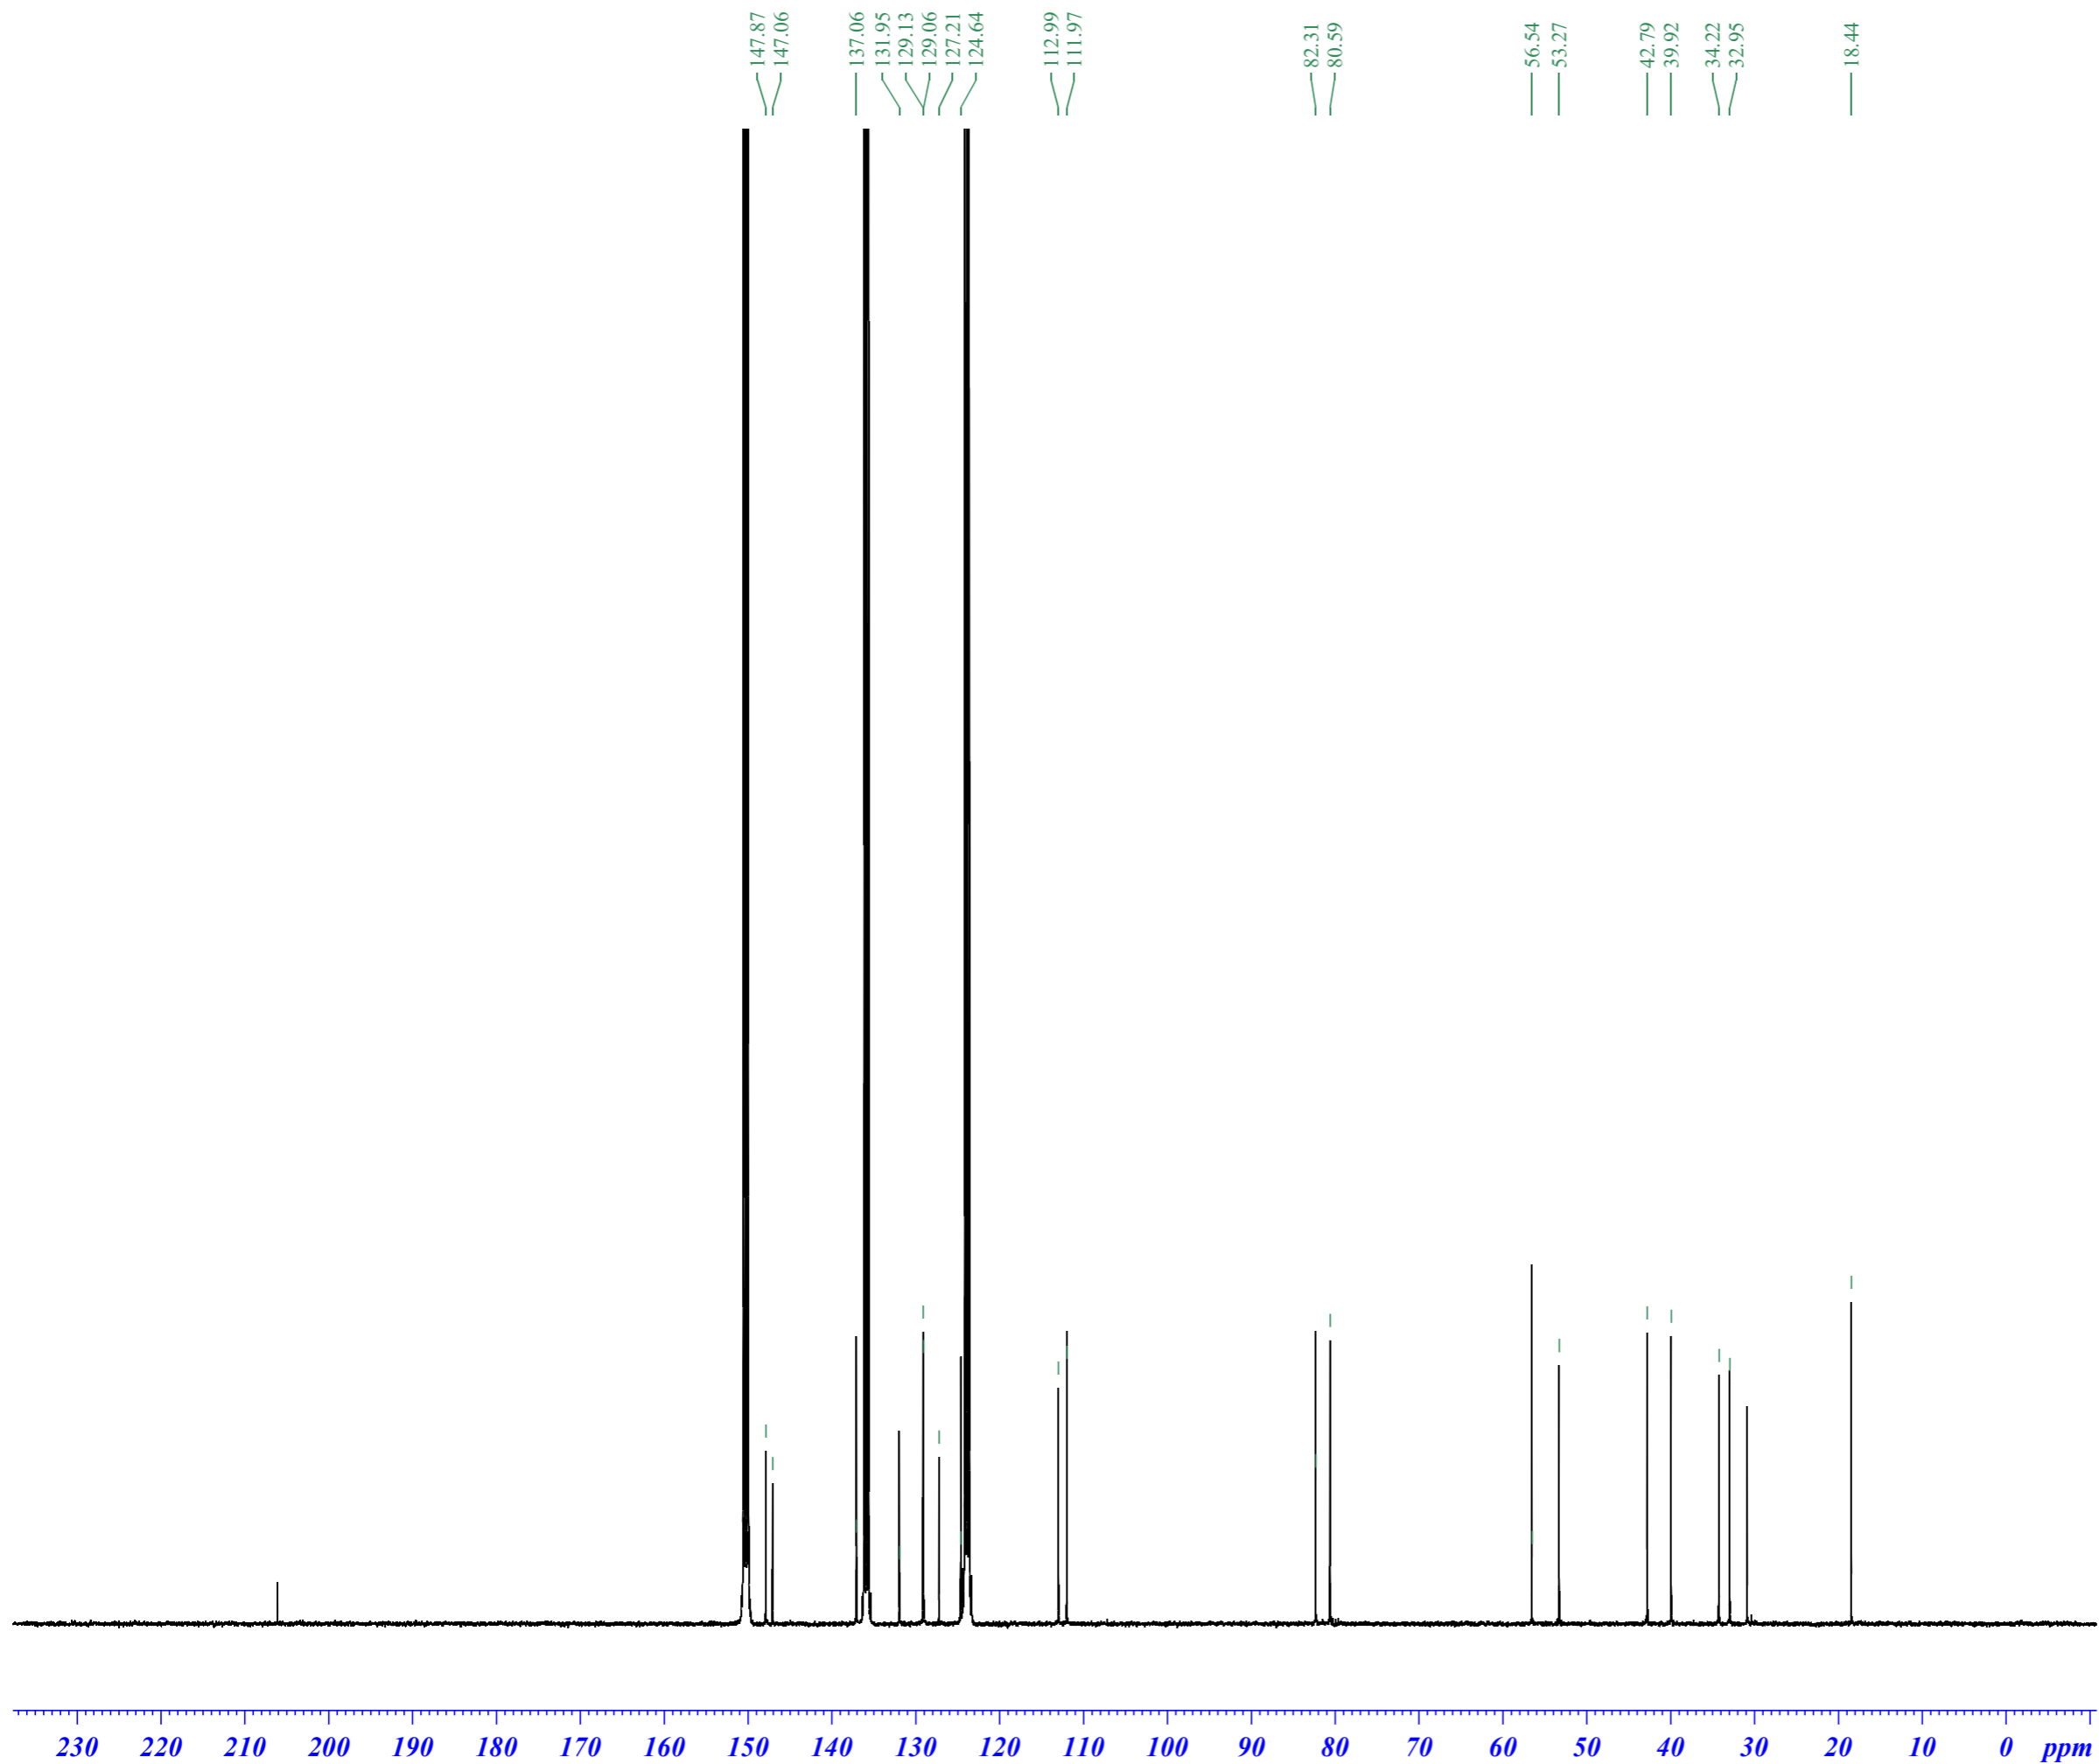

Current Data Parameters  
NAME kawai 400AN  
EXPNO 12  
PROCNO 1

F2 - Acquisition Parameters  
Date\_ 20210312  
Time 8.15 h  
INSTRUM Avance  
PROBHD Z163739\_0304 (  
PULPROG zgpg30  
TD 65536  
SOLVENT Pyr  
NS 14000  
DS 2  
SWH 25000.000 Hz  
FIDRES 0.762939 Hz  
AQ 1.3107200 sec  
RG 101  
DW 20.000 usec  
DE 8.64 usec  
TE 300.0 K  
D1 1.50000000 sec  
D11 0.03000000 sec  
TD0 1  
SFO1 100.6241209 MHz  
NUC1 13C  
P0 2.67 usec  
P1 8.00 usec  
PLW1 92.79299927 W  
SFO2 400.1326008 MHz  
NUC2 1H  
CPDPRG[2] waltz16  
PCPD2 90.00 usec  
PLW2 22.60000038 W  
PLW12 0.17857000 W  
PLW13 0.08981800 W

F2 - Processing parameters  
SI 65536  
SF 100.6127078 MHz  
WDW EM  
SSB 0  
LB 1.00 Hz  
GB 0  
PC 1.40

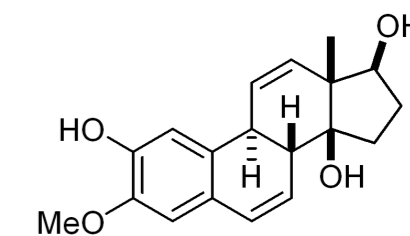

6

<sup>13</sup>C NMR (100 MHz, pyridine-d<sub>5</sub>)

**Current Data Parameters**  
 NAME kawaiA400  
 EXPNO 175  
 PROCNO 1

**F2 - Acquisition Parameters**  
 Date\_ 20201123  
 Time\_ 14.48 h  
 INSTRUM spect  
 PROBHD 5 mm QNP 1H/13  
 PULPROG zg30  
 TD 65536  
 SOLVENT CDCl3  
 NS 8  
 DS 2  
 SWH 4901.961 Hz  
 FIDRES 0.149596 Hz  
 AQ 6.6846719 sec  
 RG 812.7  
 DW 102.000 usec  
 DE 6.50 usec  
 TE 297.4 K  
 D1 1.0000000 sec  
 TD0 1  
 SFO1 400.1321477 MHz  
 NUC1 1H  
 P1 15.00 usec

**F2 - Processing parameters**  
 SI 32768  
 SF 400.1300094 MHz  
 WDW EM  
 SSB 0  
 LB 0.30 Hz  
 GB 0  
 PC 1.00

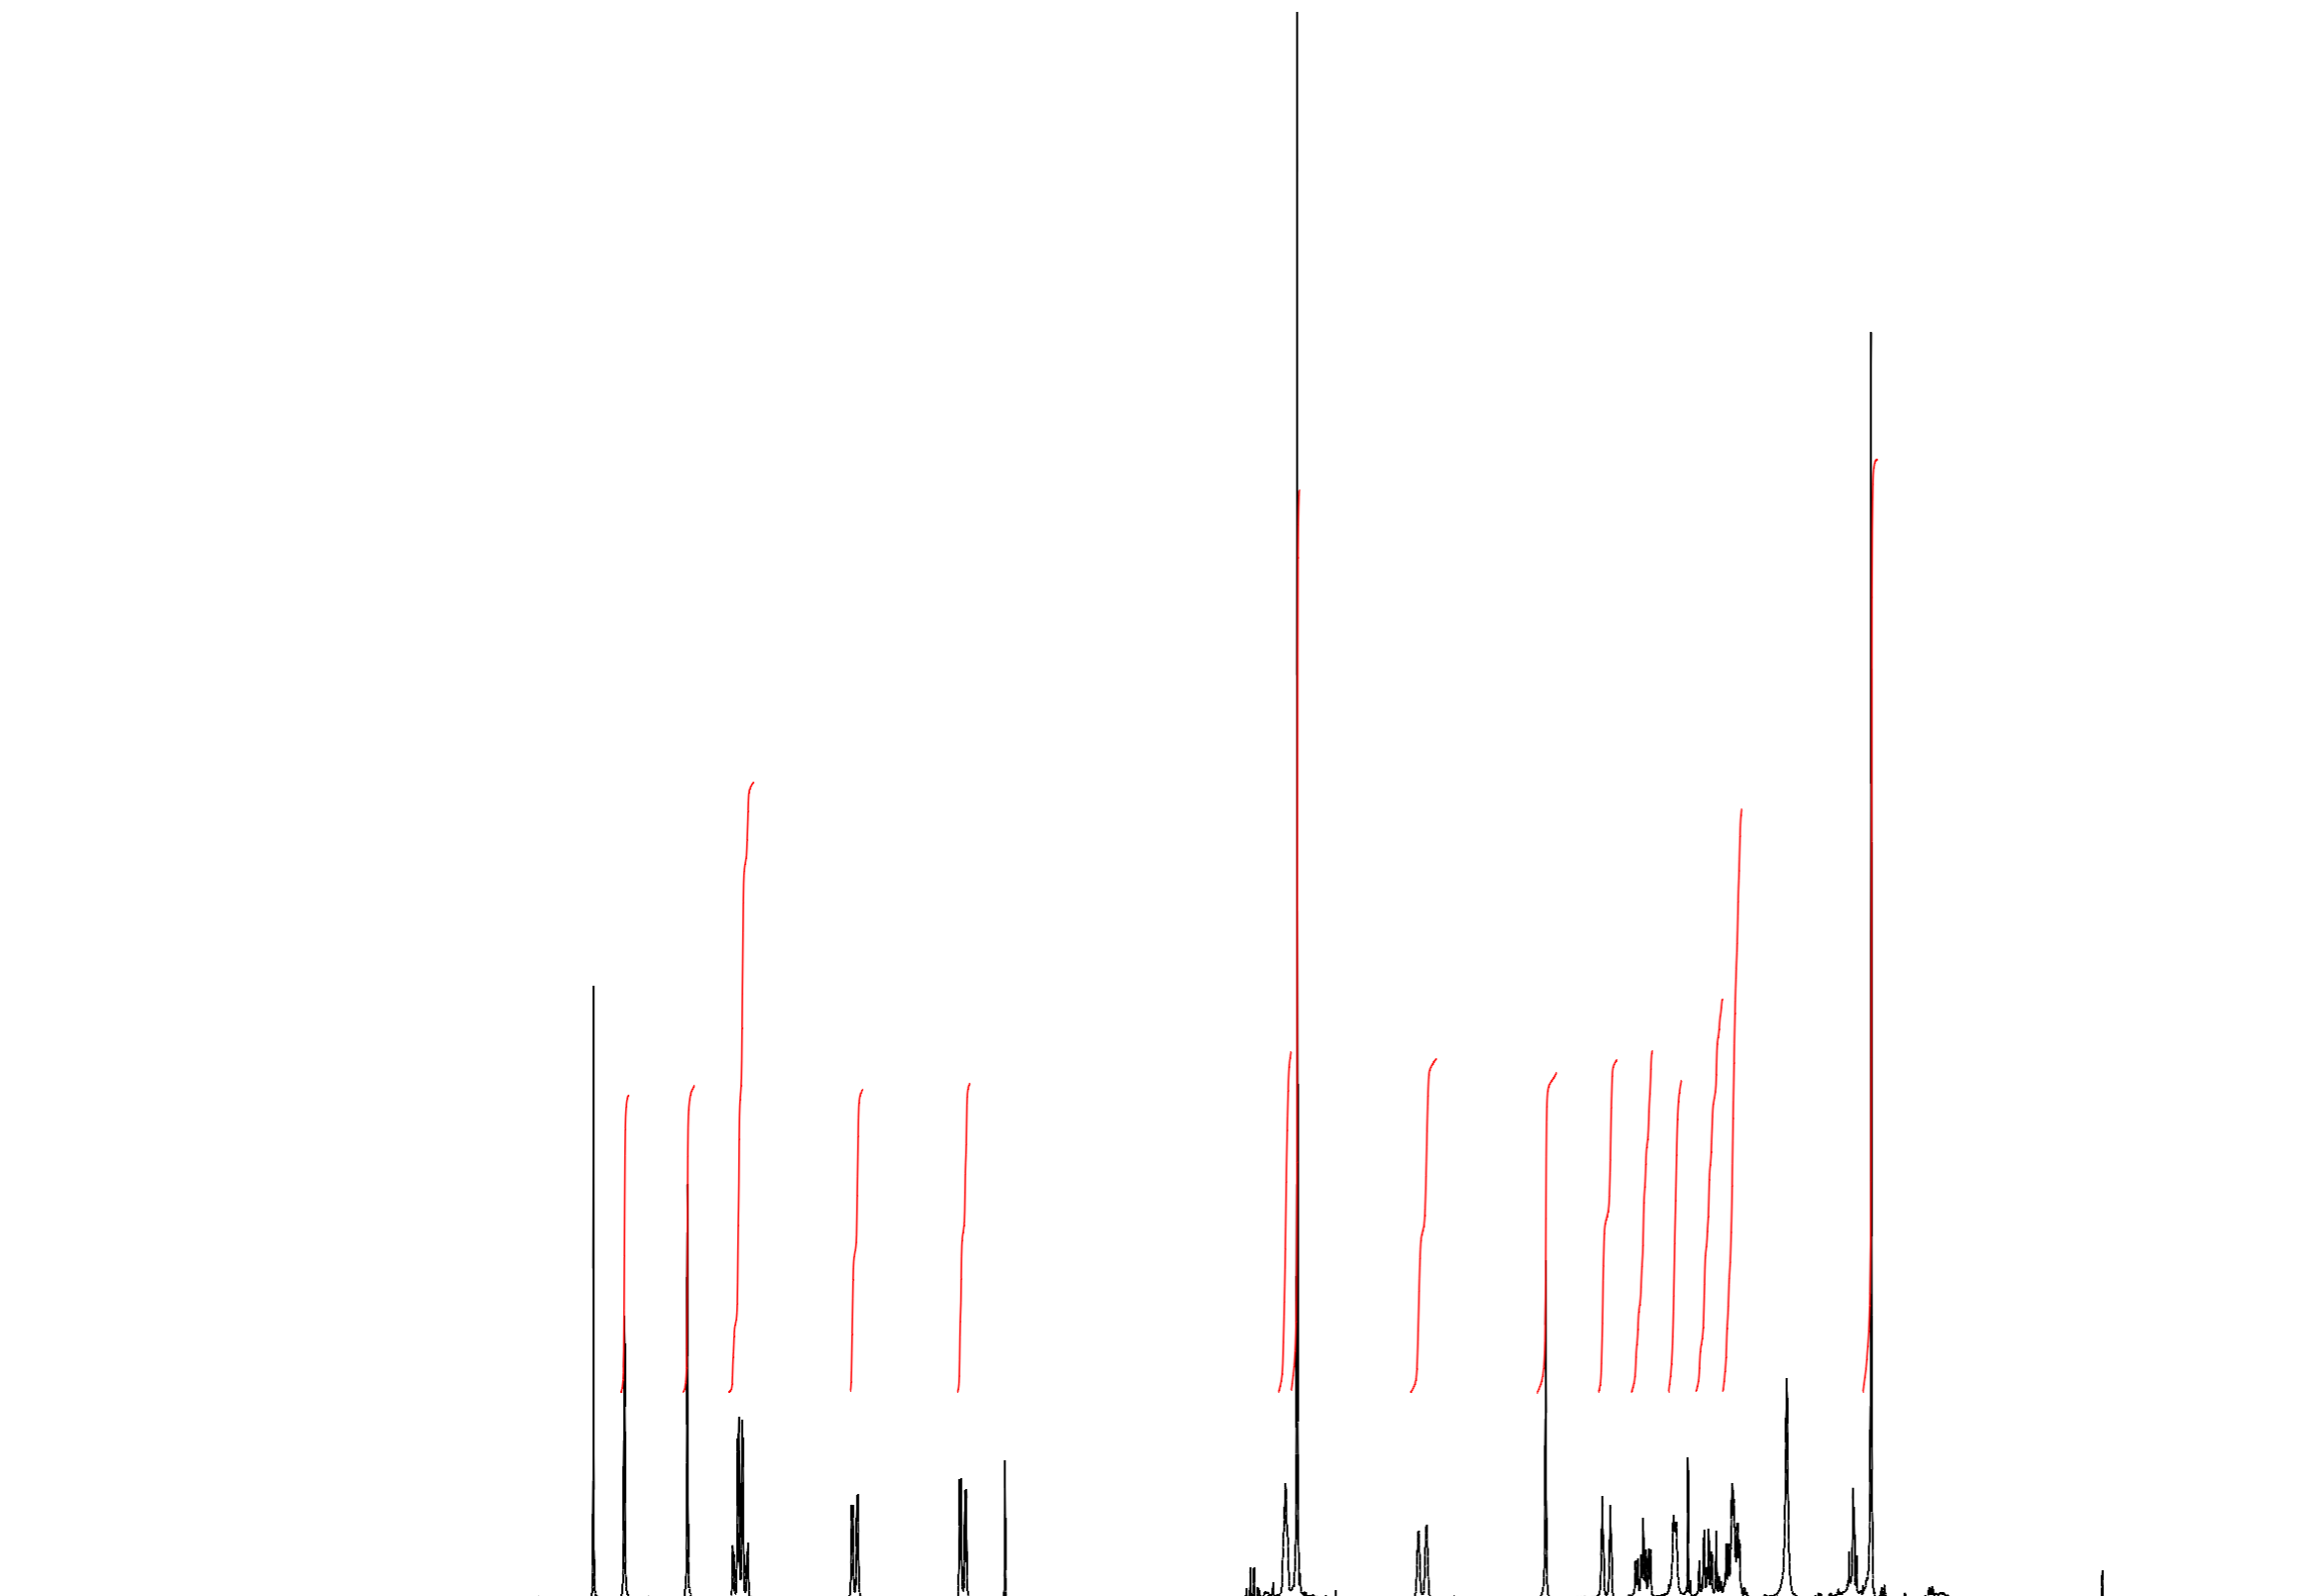

9.5 9.0 8.5 8.0 7.5 7.0 6.5 6.0 5.5 5.0 4.5 4.0 3.5 3.0 2.5 2.0 1.5 1.0 0.5 0.0 -0.5 ppm

0.971 1.000 1.989 0.985 1.008 1.107 2.941 1.088 1.041 1.083 1.112 1.015 1.283 1.903 3.040

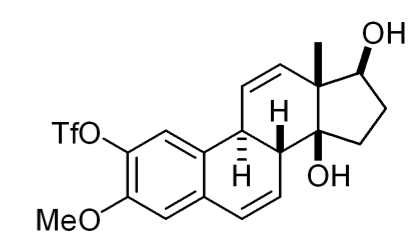

13

<sup>1</sup>H NMR (400 MHz, CDCl<sub>3</sub>)



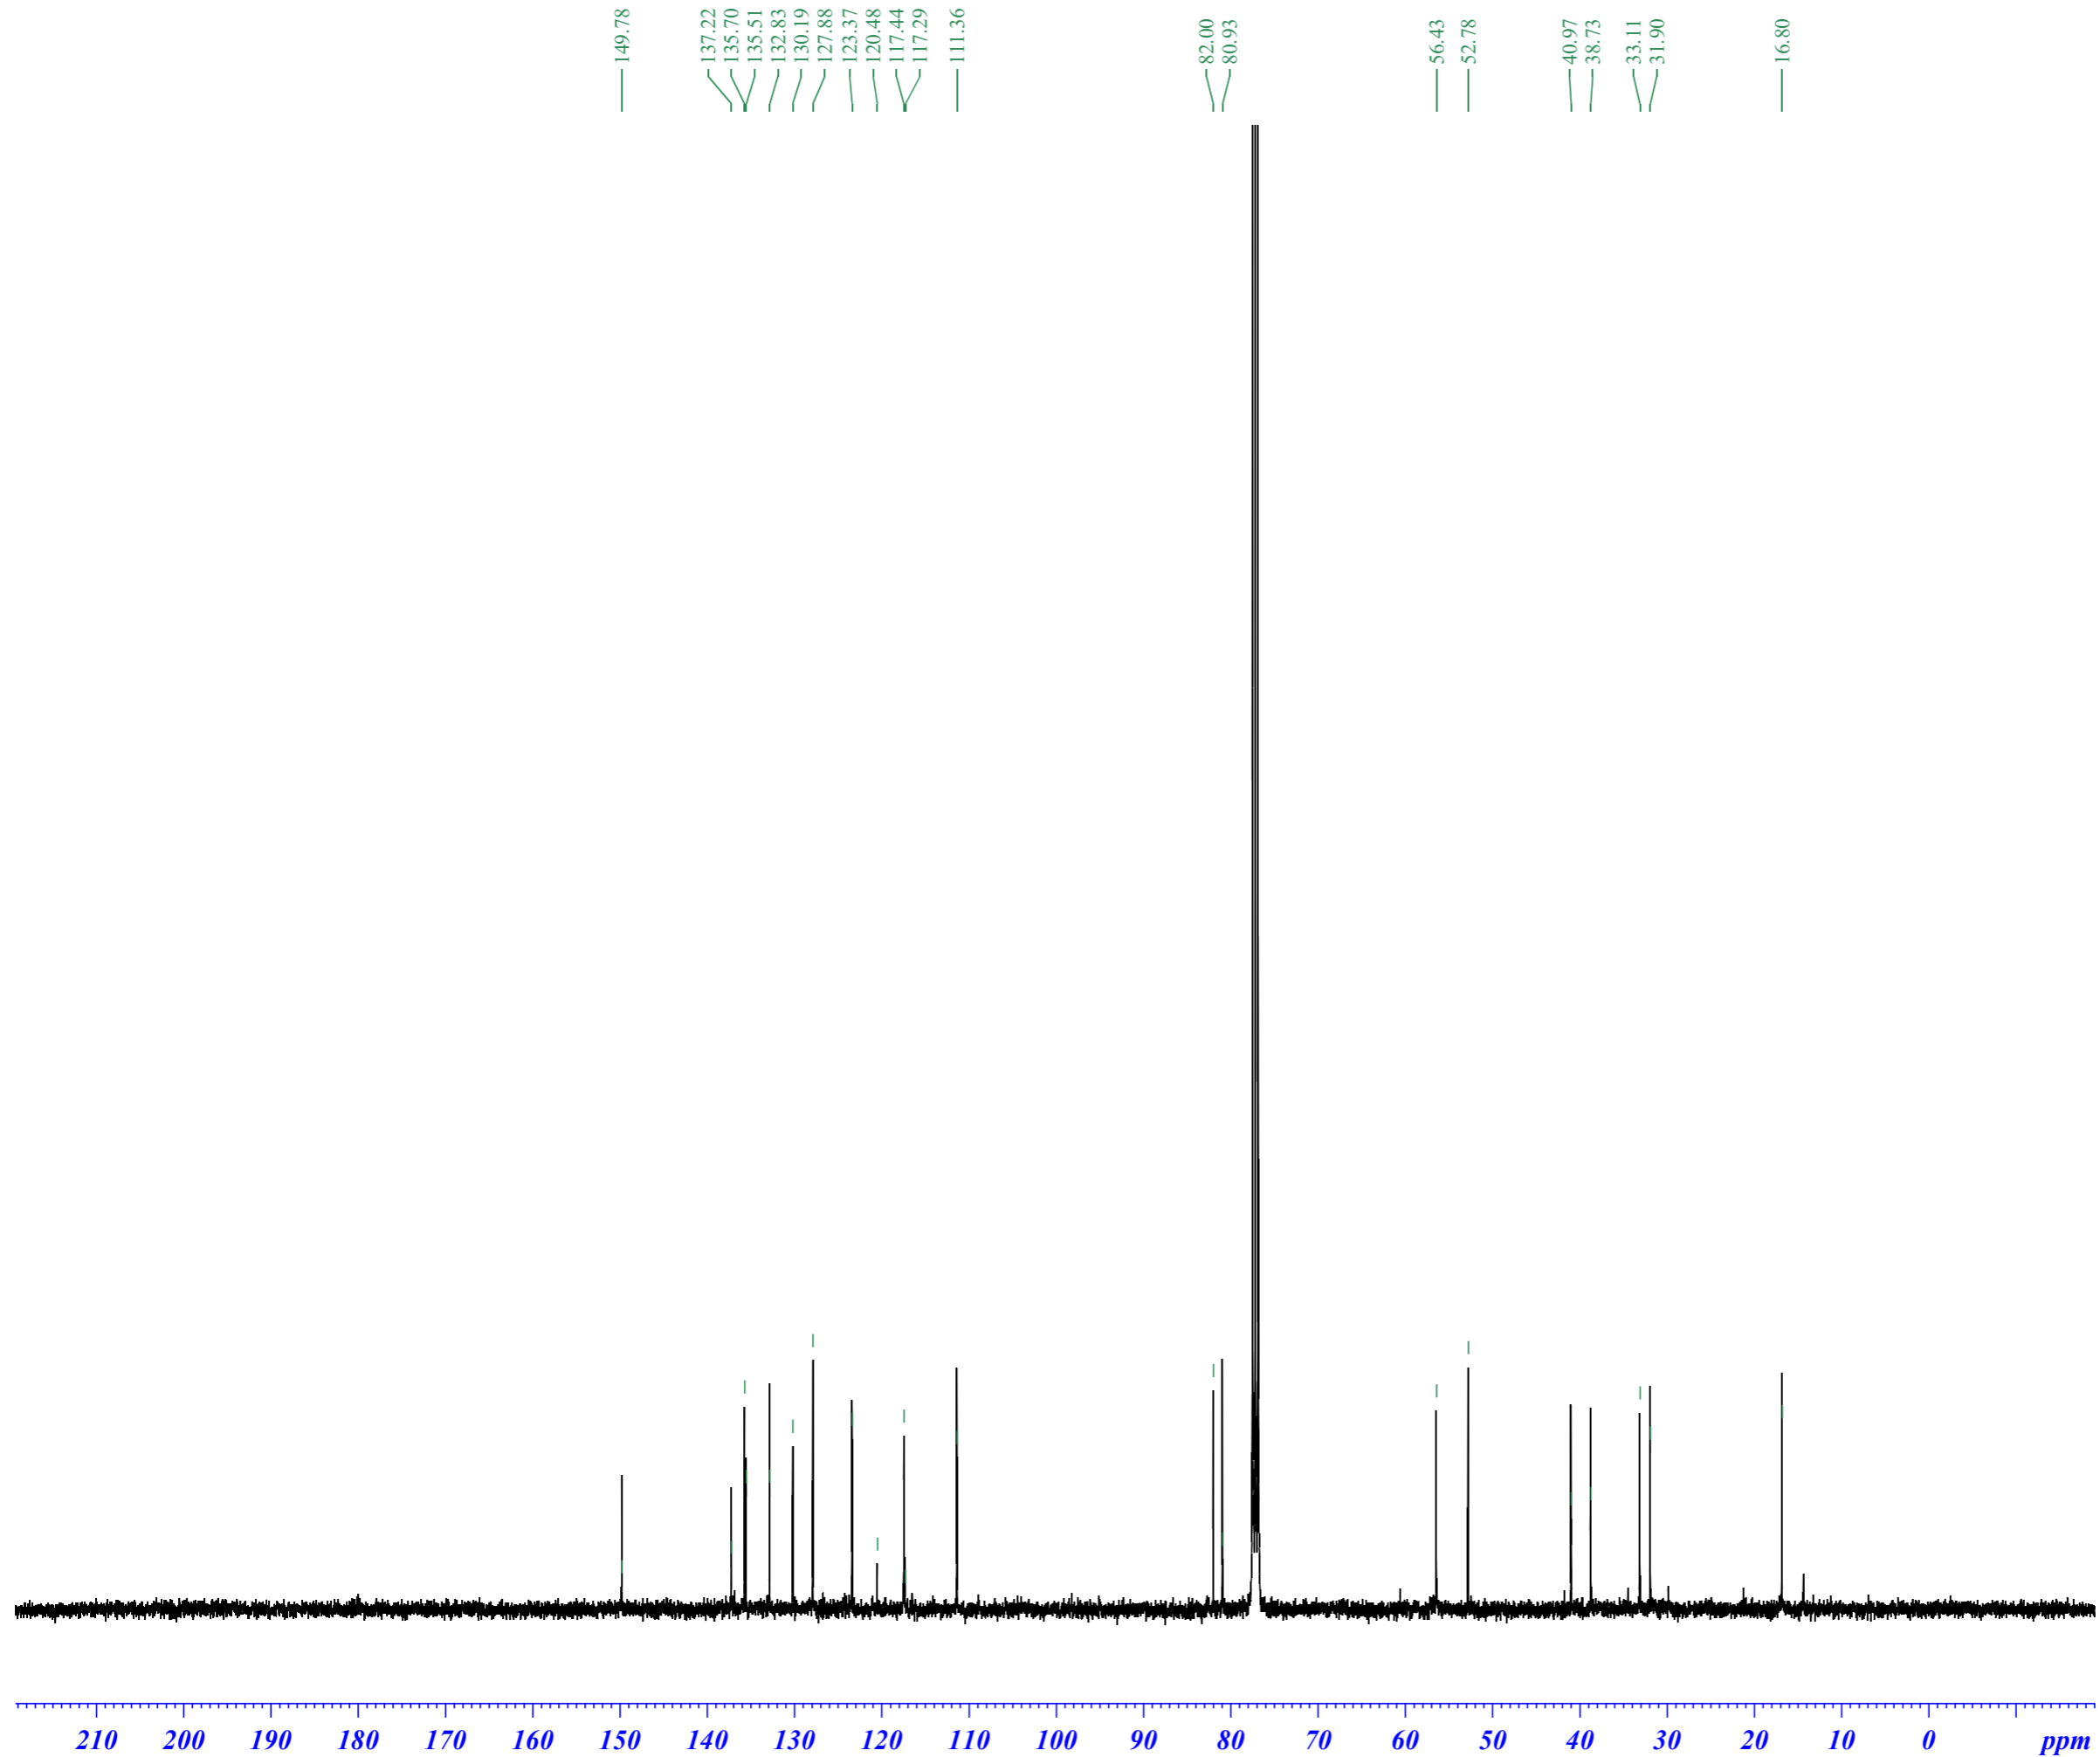

Current Data Parameters  
 NAME kawaiB400  
 EXPNO 341  
 PROCNO 1

F2 - Acquisition Parameters  
 Date\_ 20201227  
 Time 12.16  
 INSTRUM spect  
 PROBHD 5 mm QNP 1H/13  
 PULPROG zgpg30  
 TD 65536  
 SOLVENT CDCl3  
 NS 3600  
 DS 4  
 SWH 23980.814 Hz  
 FIDRES 0.365918 Hz  
 AQ 1.3664256 sec  
 RG 5792.6  
 DW 20.850 usec  
 DE 6.50 usec  
 TE 296.2 K  
 D1 1.20000005 sec  
 D11 0.03000000 sec  
 TD0 1

===== CHANNEL f1 =====  
 NUC1 13C  
 P1 12.00 usec  
 PL1 7.50 dB  
 SFO1 100.6228298 MHz

===== CHANNEL f2 =====  
 CPDPRG[2] waltz16  
 NUC2 1H  
 PCPD2 90.00 usec  
 PL2 10.30 dB  
 PL12 20.00 dB  
 PL13 20.00 dB  
 SFO2 400.1316005 MHz

F2 - Processing parameters  
 SI 32768  
 SF 100.6127561 MHz  
 WDW EM  
 SSB 0  
 LB 1.00 Hz  
 GB 0  
 PC 1.40

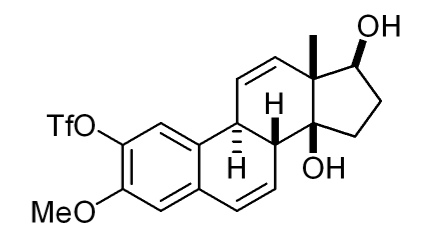

13

<sup>13</sup>C NMR (100 MHz, CDCl<sub>3</sub>)

Current Data Parameters  
 NAME kawaiB400  
 EXPNO 309  
 PROCNO 1

F2 - Acquisition Parameters  
 Date\_ 20201202  
 Time\_ 15.47  
 INSTRUM spect  
 PROBHD 5 mm QNP 1H/13  
 PULPROG zg30  
 TD 65536  
 SOLVENT CDCl3  
 NS 8  
 DS 2  
 SWH 8278.146 Hz  
 FIDRES 0.126314 Hz  
 AQ 3.9583745 sec  
 RG 1625.5  
 DW 60.400 usec  
 DE 6.50 usec  
 TE 296.2 K  
 D1 1.0000000 sec  
 TD0 1

==== CHANNEL f1 =====  
 NUC1 1H  
 P1 15.00 usec  
 PL1 10.30 dB  
 SFO1 400.1324710 MHz

F2 - Processing parameters  
 SI 32768  
 SF 400.1300094 MHz  
 WDW EM  
 SSB 0  
 LB 0.30 Hz  
 GB 0  
 PC 1.00

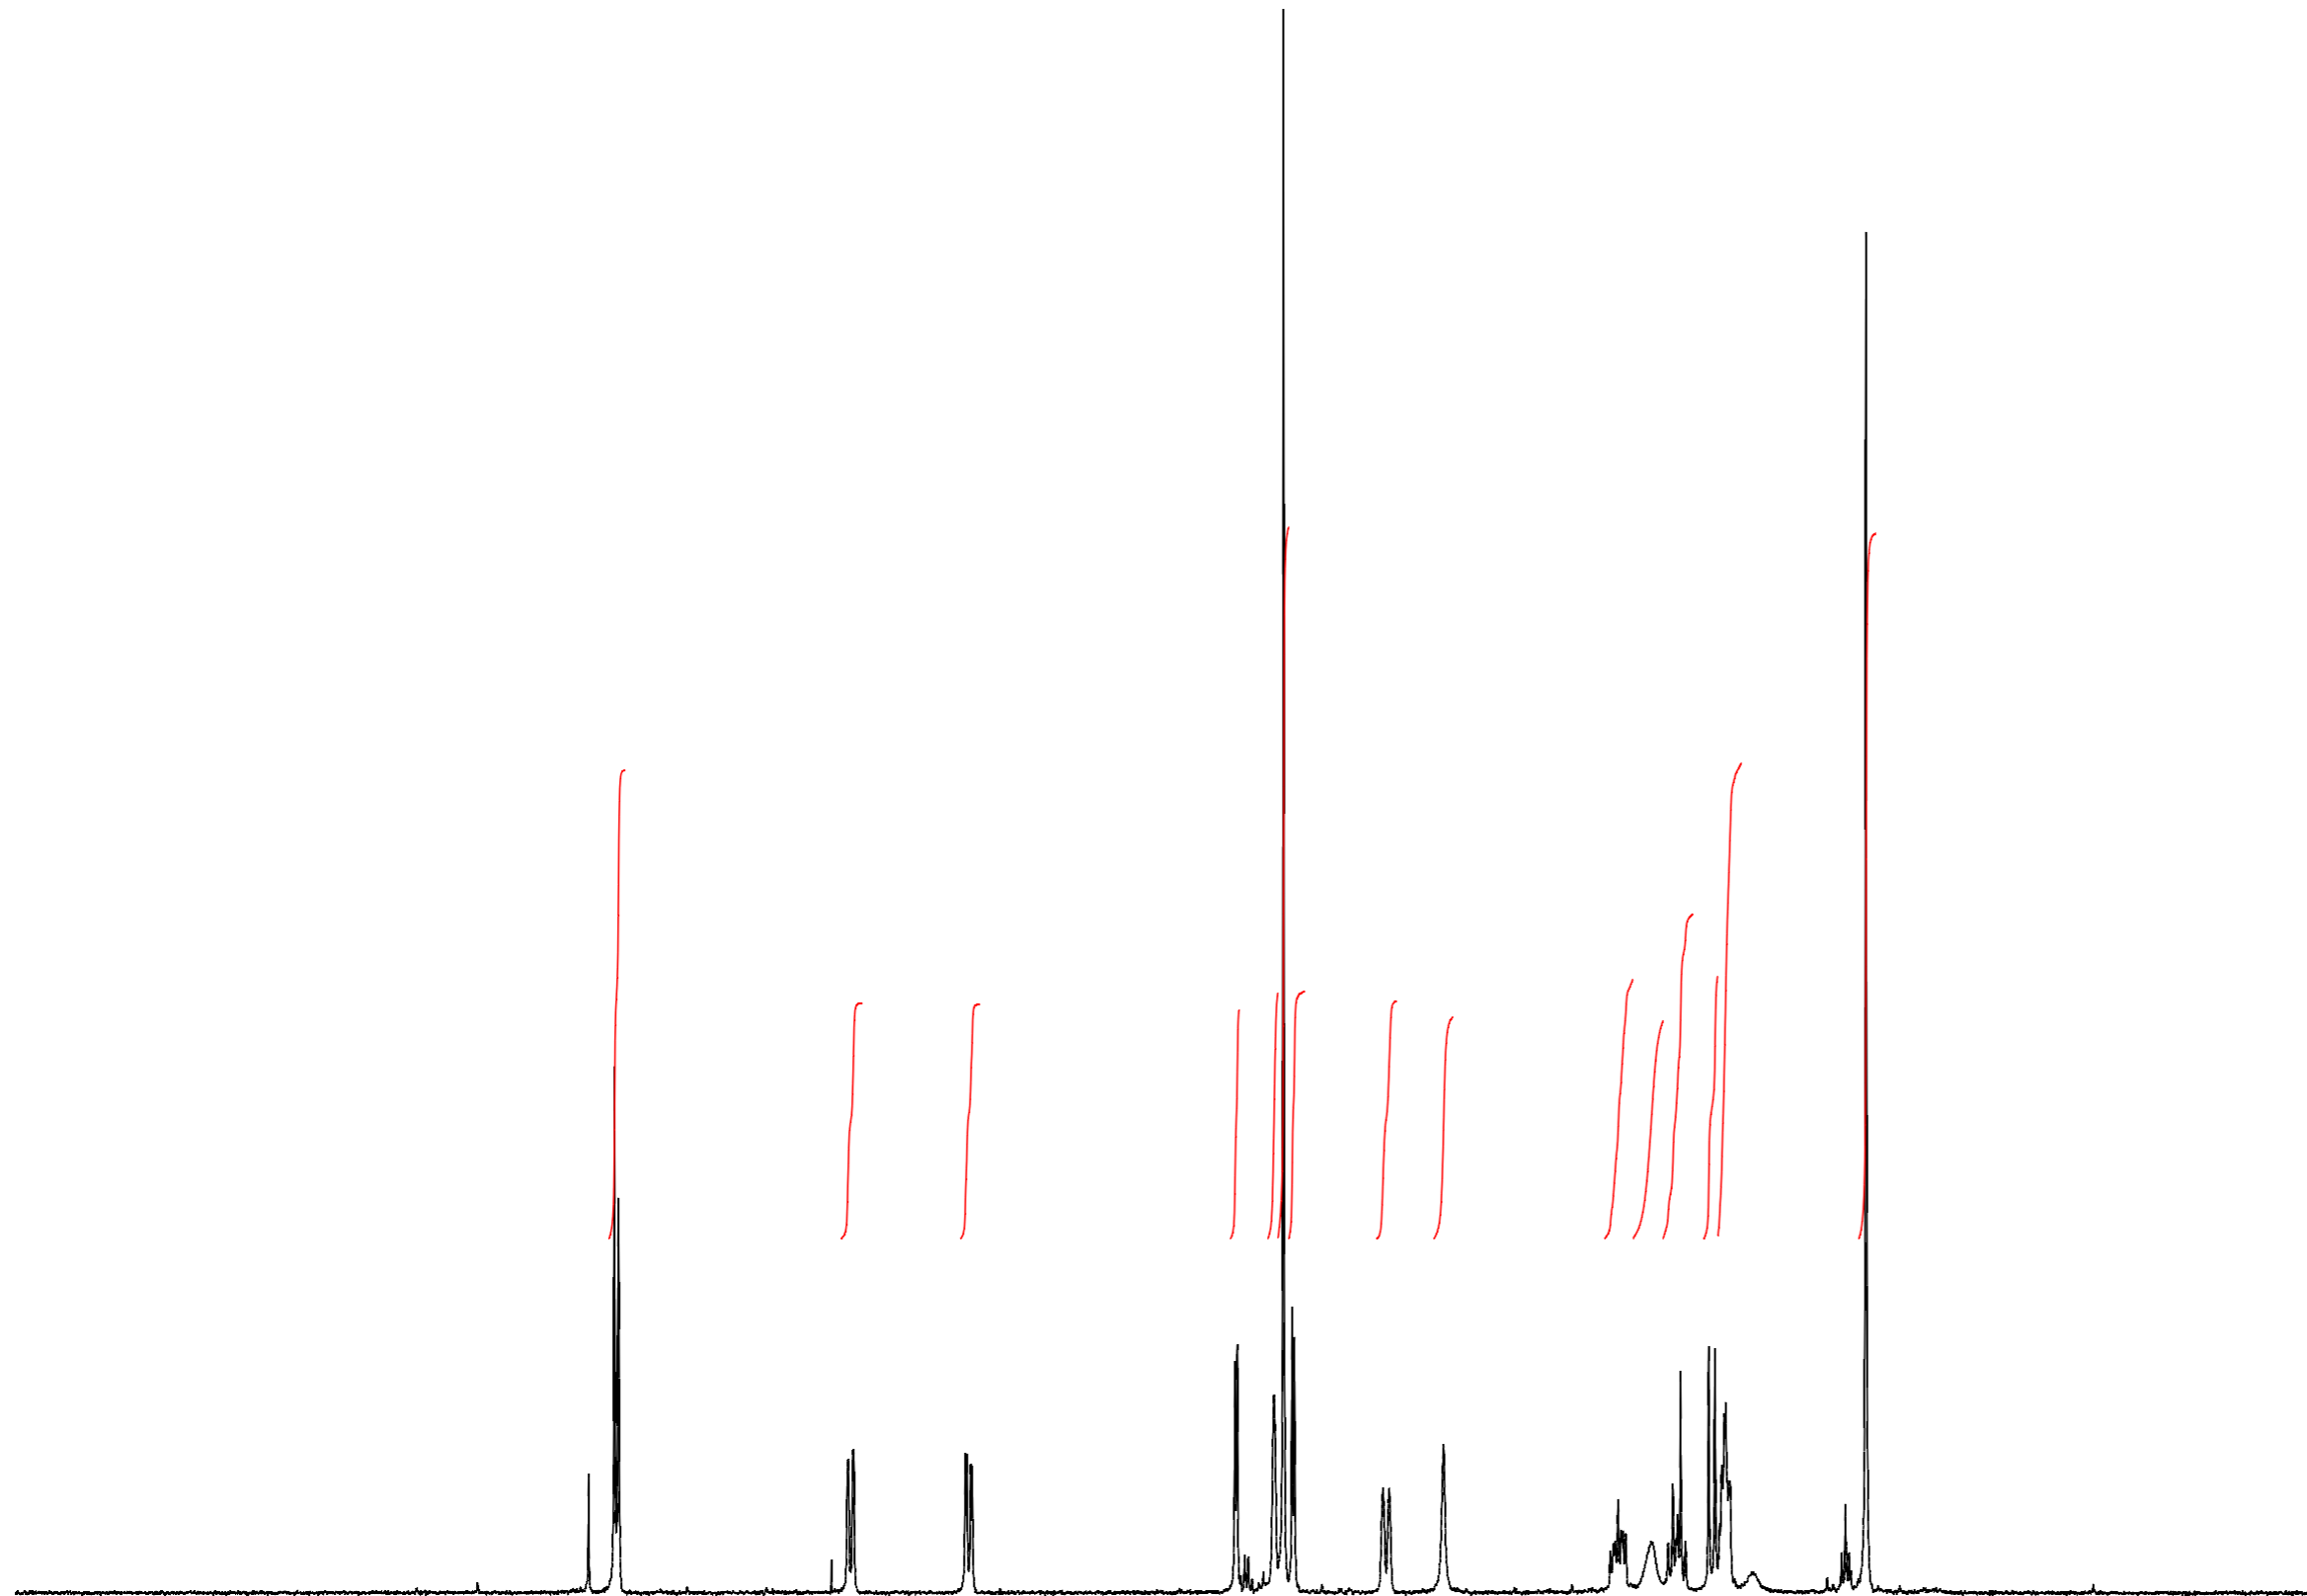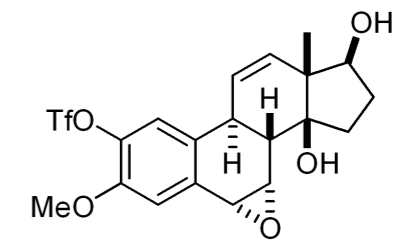

14a

<sup>1</sup>H NMR (400 MHz, CDCl<sub>3</sub>)

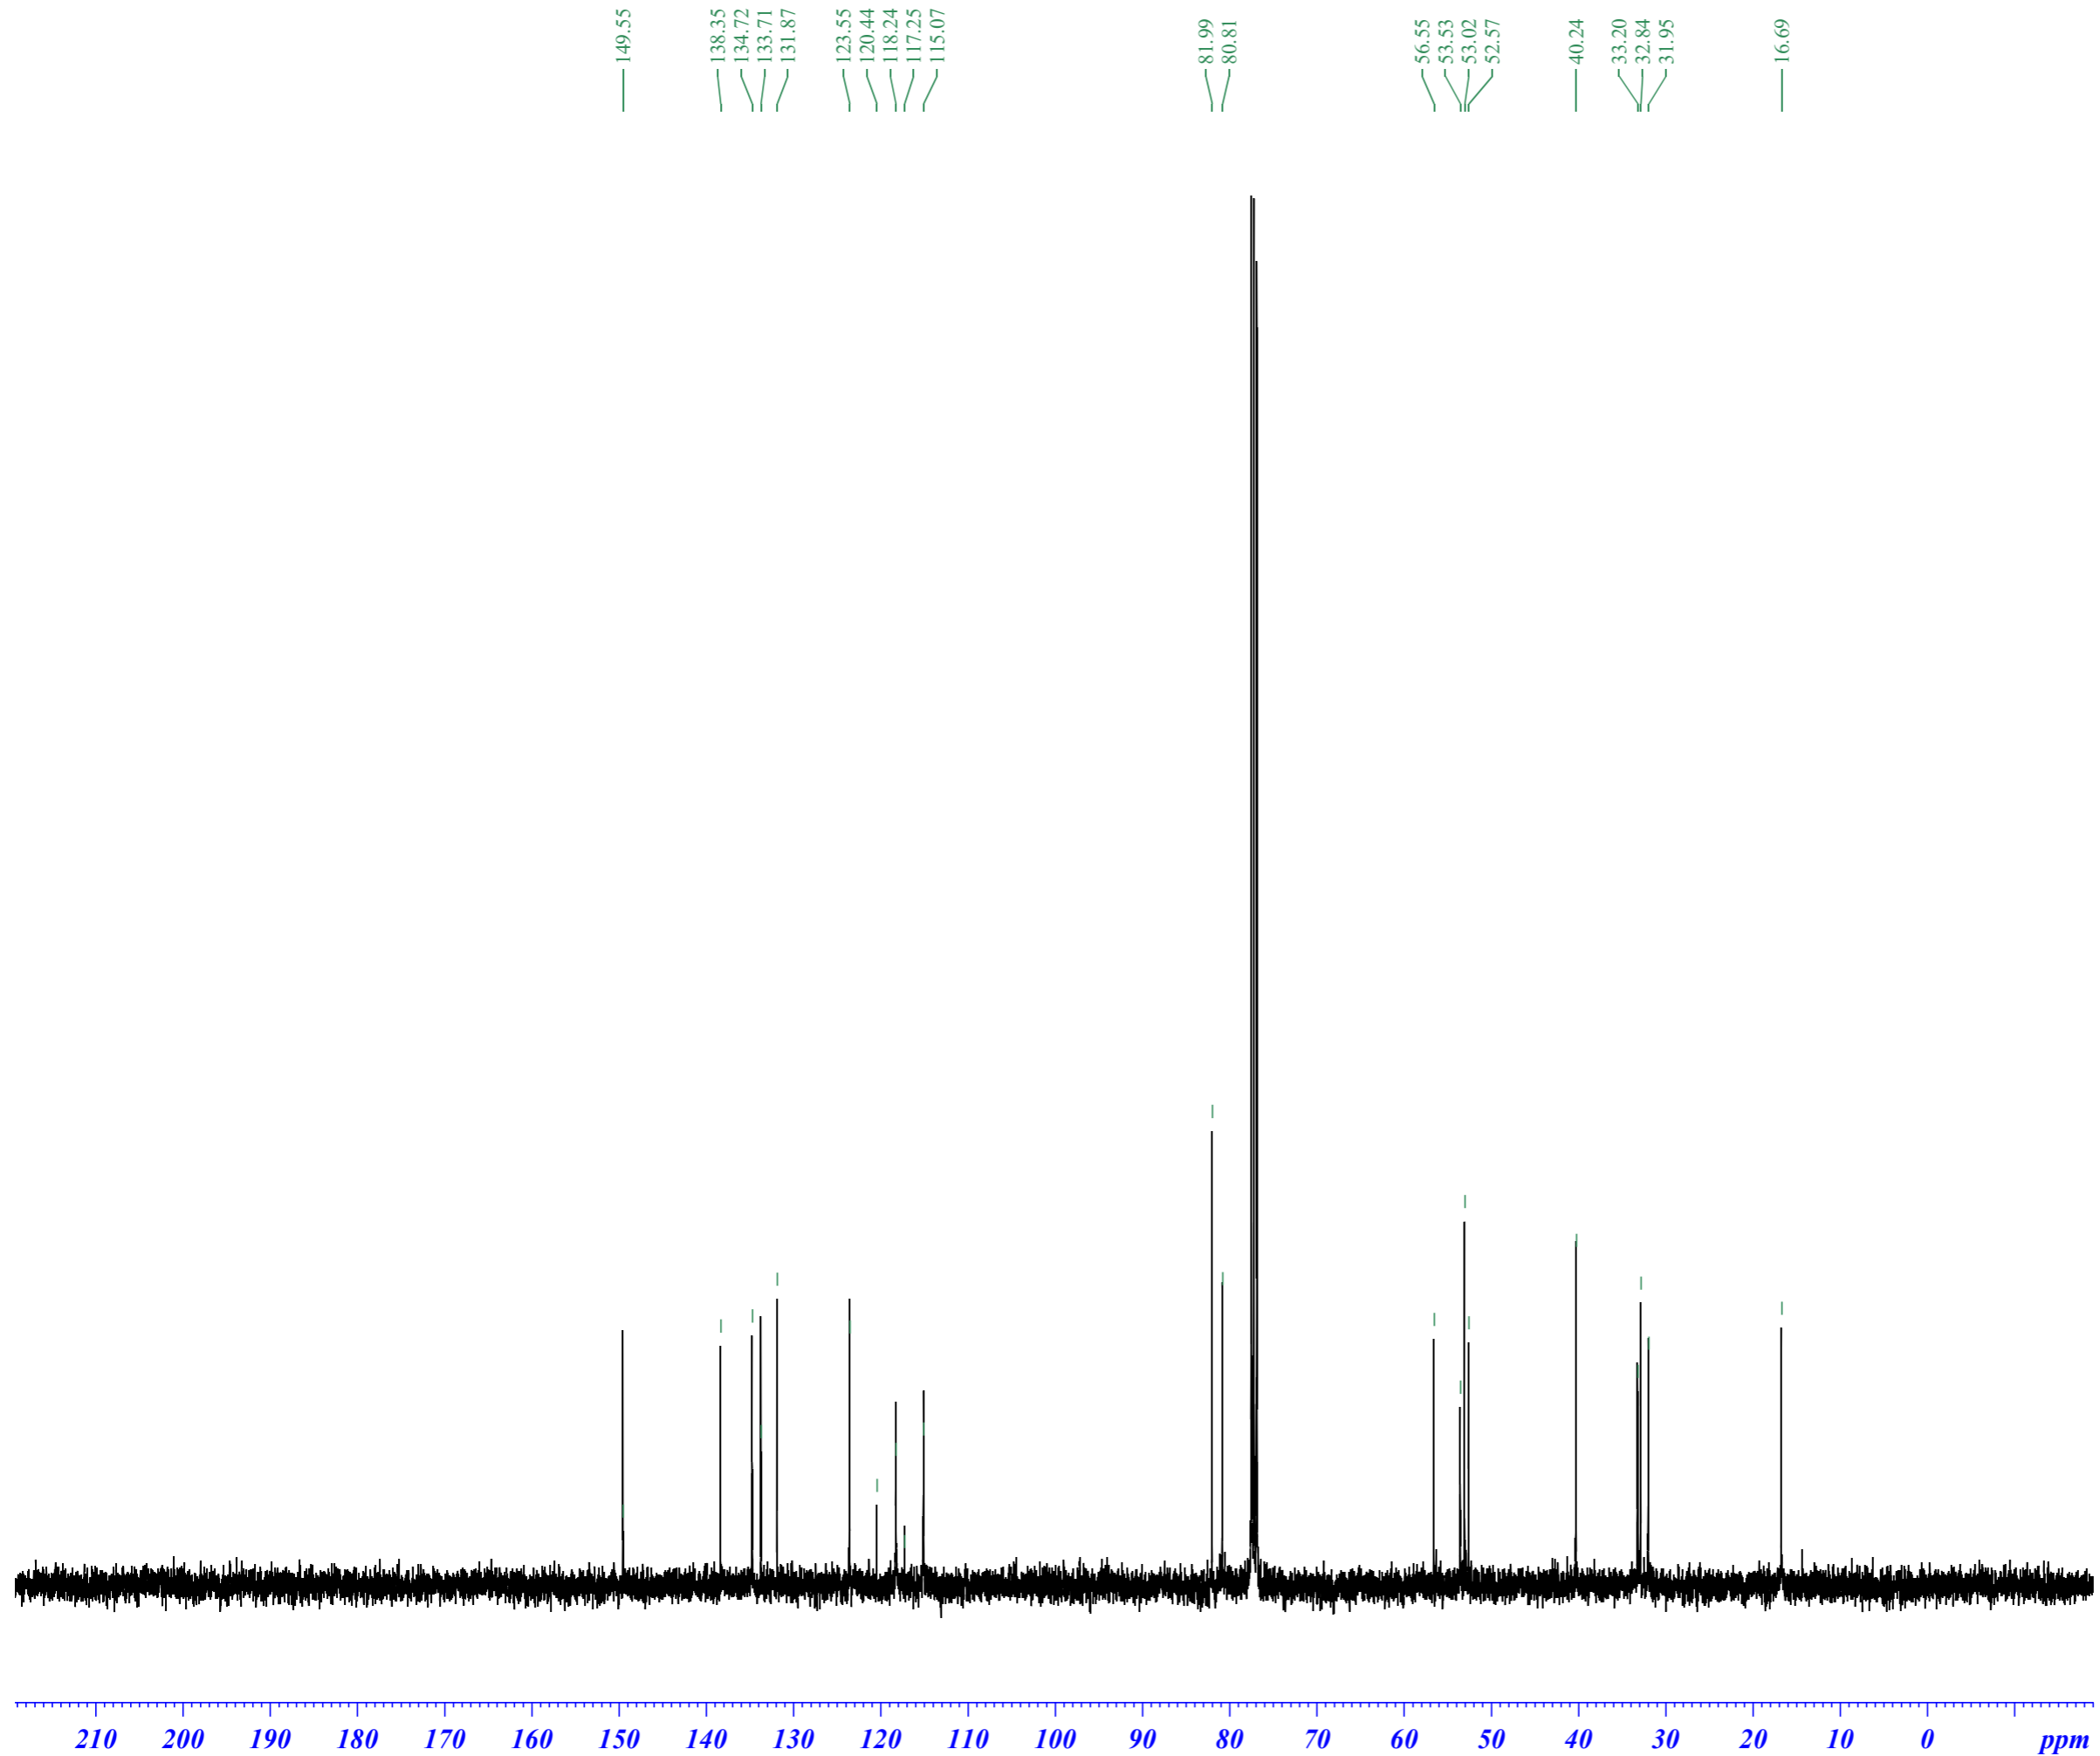

Current Data Parameters  
 NAME kawaiB400  
 EXPNO 310  
 PROCNO 1

F2 - Acquisition Parameters  
 Date\_ 20201202  
 Time\_ 16.00  
 INSTRUM spect  
 PROBHD 5 mm QNP 1H/13  
 PULPROG zgpg30  
 TD 65536  
 SOLVENT CDCl3  
 NS 250  
 DS 4  
 SWH 23980.814 Hz  
 FIDRES 0.365918 Hz  
 AQ 1.3664256 sec  
 RG 5792.6  
 DW 20.850 usec  
 DE 6.50 usec  
 TE 296.2 K  
 D1 1.20000005 sec  
 D11 0.03000000 sec  
 TD0 1

==== CHANNEL f1 =====  
 NUC1 13C  
 P1 12.00 usec  
 PL1 7.50 dB  
 SFO1 100.6228298 MHz

==== CHANNEL f2 =====  
 CPDPRG[2] waltz16  
 NUC2 1H  
 PCPD2 90.00 usec  
 PL2 10.30 dB  
 PL12 20.00 dB  
 PL13 20.00 dB  
 SFO2 400.1316005 MHz

F2 - Processing parameters  
 SI 32768  
 SF 100.6127572 MHz  
 WDW EM  
 SSB 0  
 LB 1.00 Hz  
 GB 0  
 PC 1.40

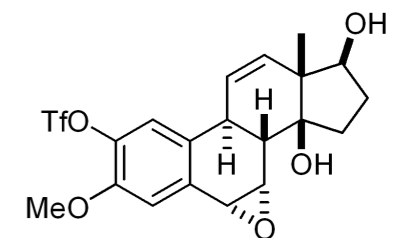

14a

<sup>13</sup>C NMR (100 MHz, CDCl<sub>3</sub>)

Current Data Parameters  
 NAME kawaiB400-2  
 EXPNO 20  
 PROCNO 1

F2 - Acquisition Parameters  
 Date\_ 20210304  
 Time\_ 13.03 h  
 INSTRUM spect  
 PROBHD 5 mm QNP 1H/13  
 PULPROG zg30  
 TD 65536  
 SOLVENT CDCl3  
 NS 16  
 DS 2  
 SWH 8278.146 Hz  
 FIDRES 0.252629 Hz  
 AQ 3.9583745 sec  
 RG 1024  
 DW 60.400 usec  
 DE 6.50 usec  
 TE 296.5 K  
 D1 1.0000000 sec  
 TD0 1  
 SFO1 400.1324710 MHz  
 NUC1 1H  
 P1 15.00 usec

F2 - Processing parameters  
 SI 32768  
 SF 400.1300096 MHz  
 WDW EM  
 SSB 0  
 LB 0.30 Hz  
 GB 0  
 PC 1.00

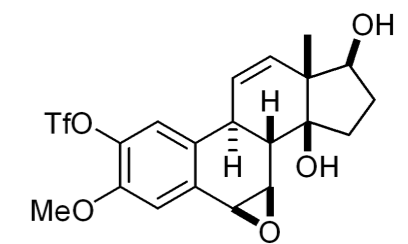

14b

<sup>1</sup>H NMR (400 MHz, CDCl<sub>3</sub>)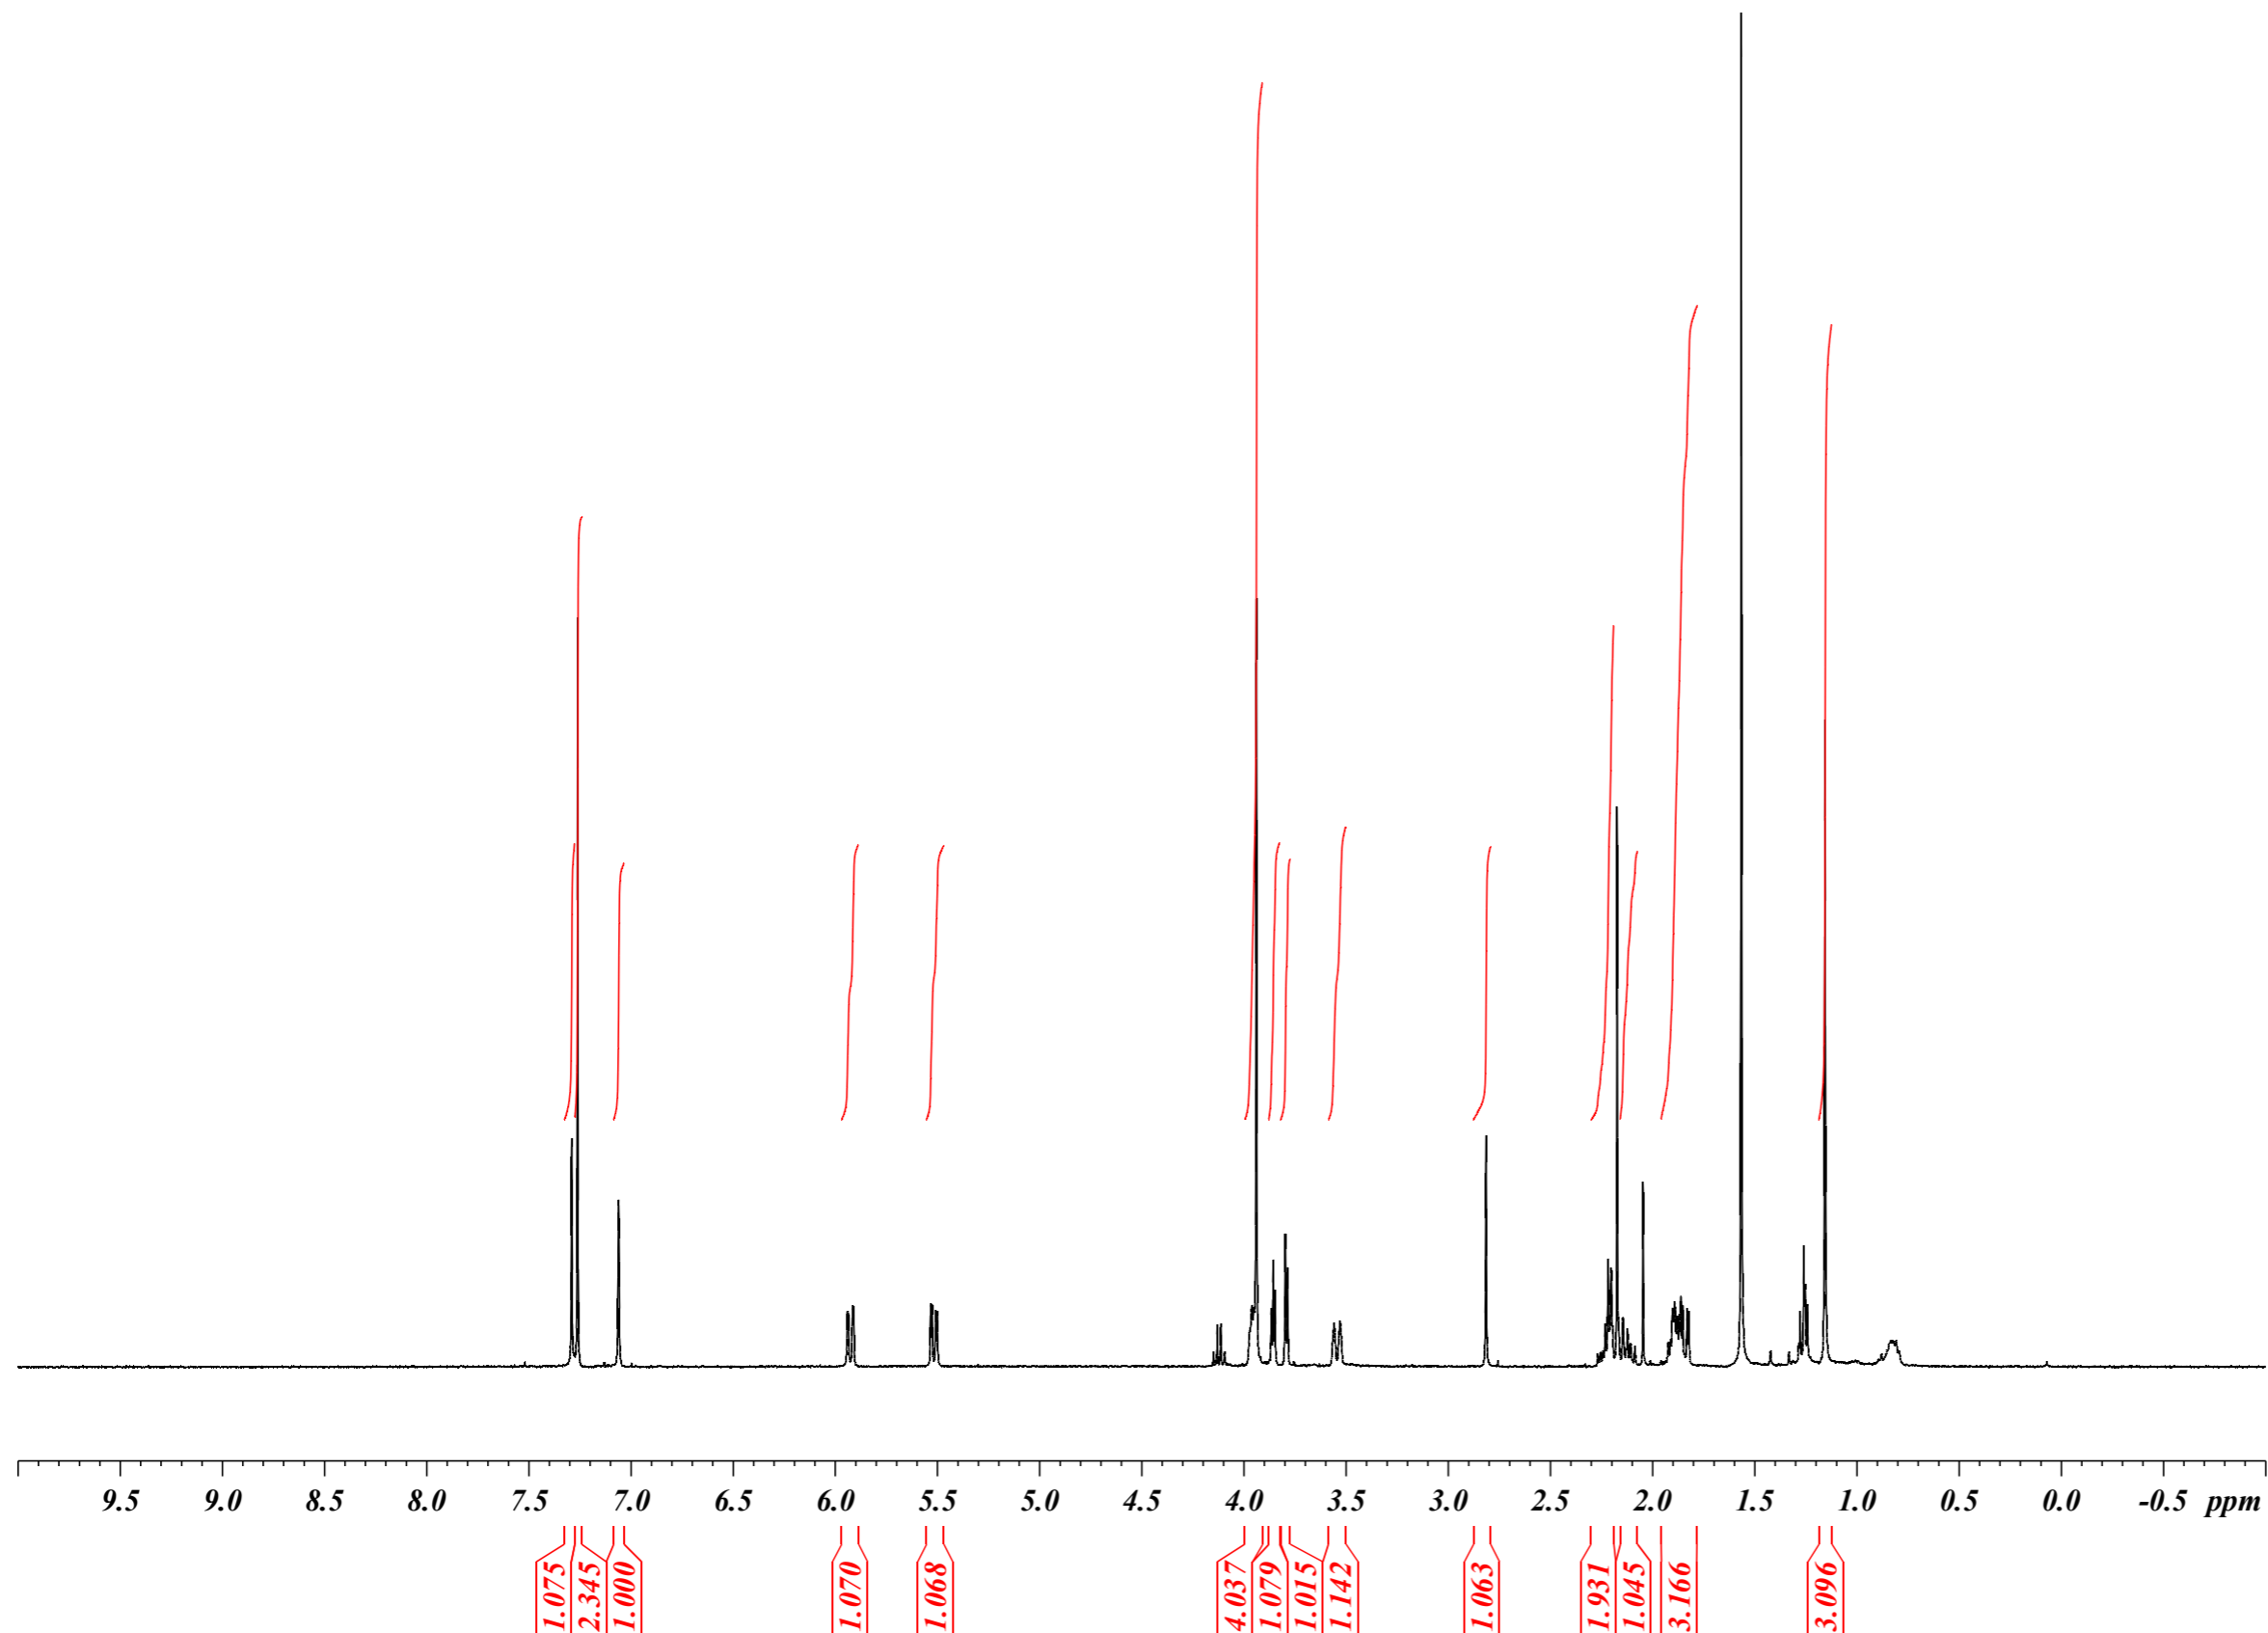

[2144] bp

150.09  
138.73  
136.35  
134.03  
133.72  
123.00  
118.55  
116.38  
81.96  
80.83  
56.54  
54.96  
52.76  
48.76  
46.50  
37.74  
32.81  
31.87  
16.48

Current Data Parameters  
NAME kawai 400 AN  
EXPNO 8  
PROCNO 1

F2 - Acquisition Parameters  
Date\_ 20210311  
Time 14.45 h  
INSTRUM Avance  
PROBHD Z163739\_0304 (  
PULPROG zgpg30  
TD 65536  
SOLVENT CDCl3  
NS 3200  
DS 2  
SWH 25000.000 Hz  
FIDRES 0.762939 Hz  
AQ 1.3107200 sec  
RG 101  
DW 20.000 usec  
DE 8.64 usec  
TE 300.0 K  
D1 1.50000000 sec  
D11 0.03000000 sec  
TD0 1  
SFO1 100.6241209 MHz  
NUC1 13C  
P0 2.67 usec  
P1 8.00 usec  
PLW1 92.79299927 W  
SFO2 400.1326008 MHz  
NUC2 1H  
CPDPRG[2] waltz16  
PCPD2 90.00 usec  
PLW2 22.60000038 W  
PLW12 0.17857000 W  
PLW13 0.08981800 W

F2 - Processing parameters  
SI 65536  
SF 100.6127537 MHz  
WDW EM  
SSB 0  
LB 1.00 Hz  
GB 0  
PC 1.40

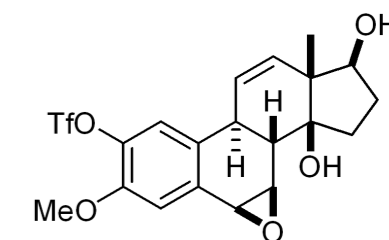

14b

<sup>13</sup>C NMR (100 MHz, CDCl<sub>3</sub>)

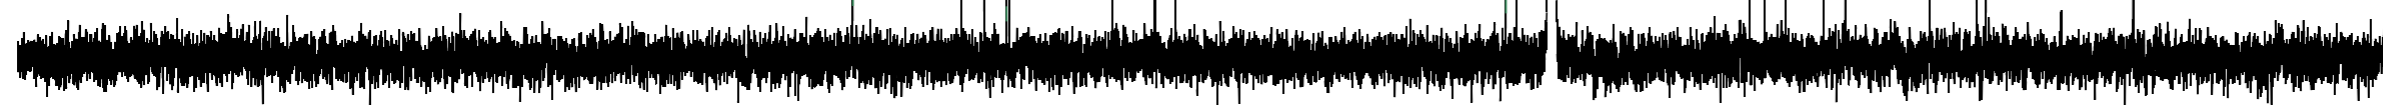

230 220 210 200 190 180 170 160 150 140 130 120 110 100 90 80 70 60 50 40 30 20 10 0 ppm

Current Data Parameters  
 NAME kawaiB400-2  
 EXPNO 18  
 PROCNO 1

F2 - Acquisition Parameters  
 Date\_ 20210303  
 Time\_ 15.45 h  
 INSTRUM spect  
 PROBHD 5 mm QNP 1H/13  
 PULPROG zg30  
 TD 65536  
 SOLVENT CDCl3  
 NS 16  
 DS 2  
 SWH 8278.146 Hz  
 FIDRES 0.252629 Hz  
 AQ 3.9583745 sec  
 RG 456.1  
 DW 60.400 usec  
 DE 6.50 usec  
 TE 296.3 K  
 D1 1.0000000 sec  
 TD0 1  
 SFO1 400.1324710 MHz  
 NUC1 1H  
 P1 15.00 usec

F2 - Processing parameters  
 SI 32768  
 SF 400.1300095 MHz  
 WDW EM  
 SSB 0  
 LB 0.30 Hz  
 GB 0  
 PC 1.00

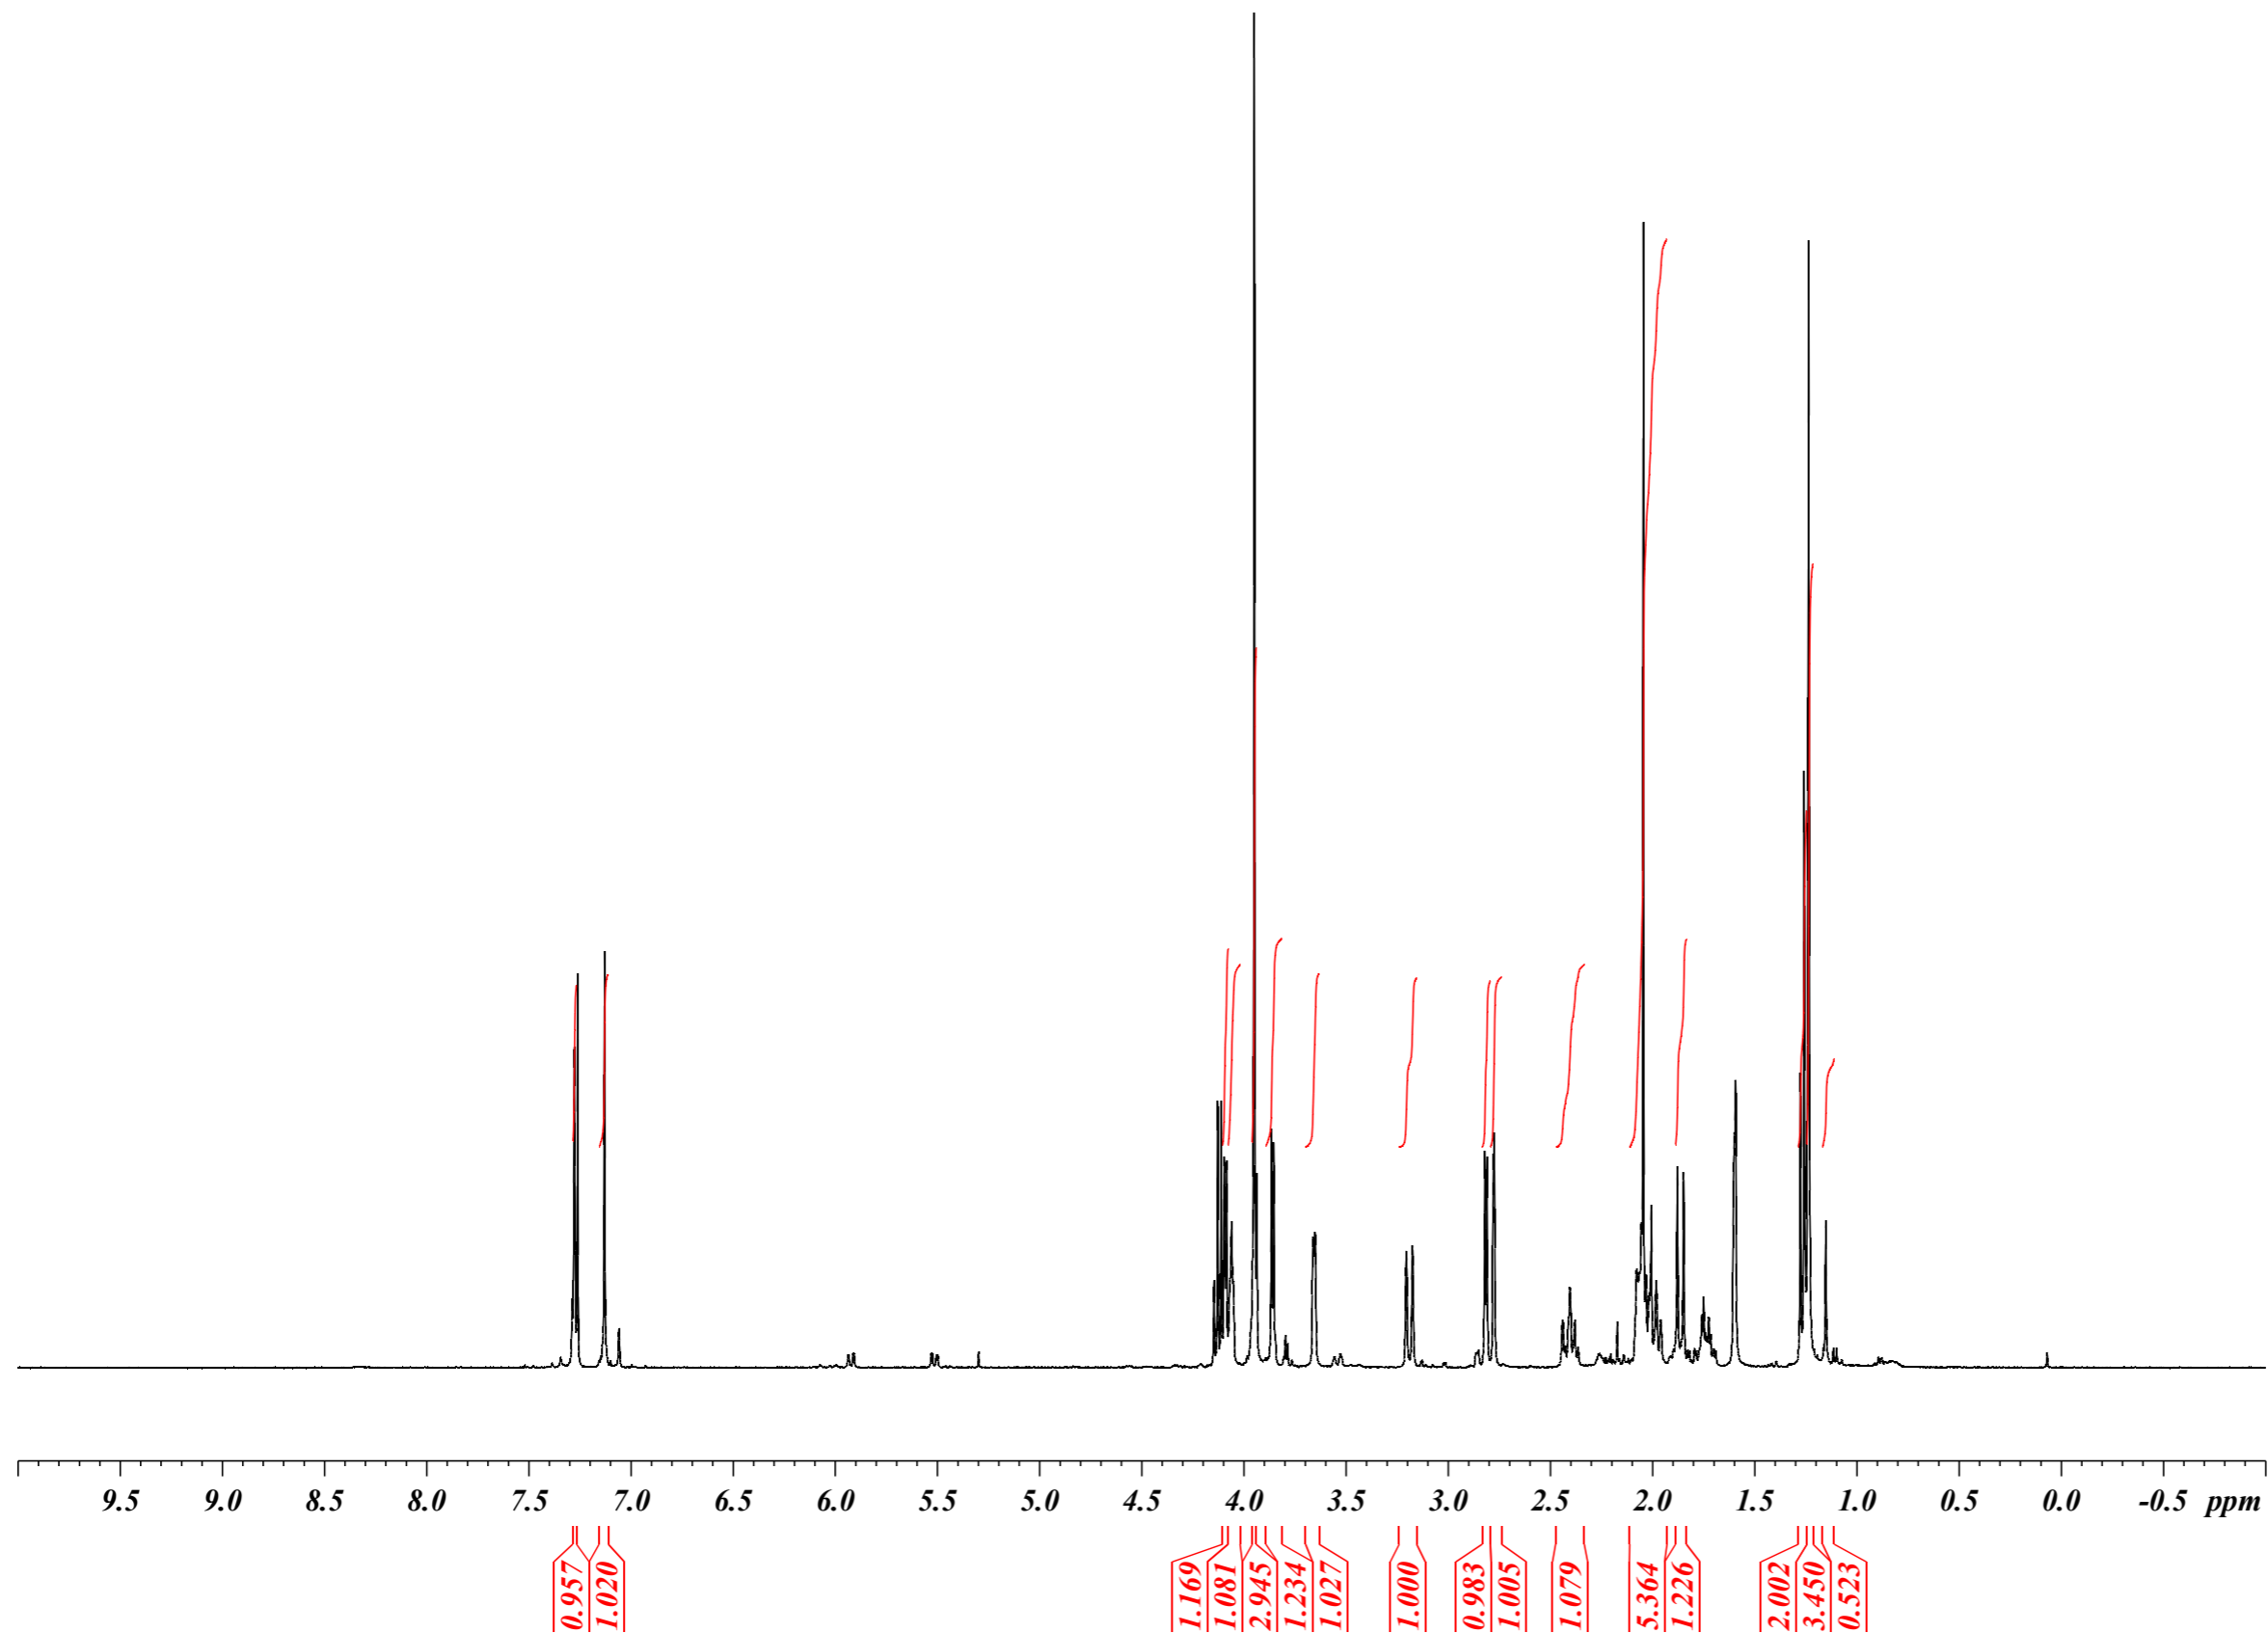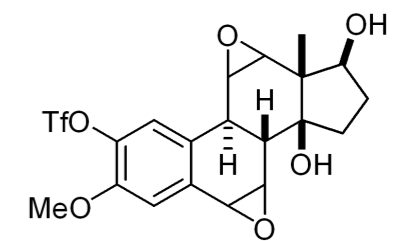

15

<sup>1</sup>H NMR (400 MHz, CDCl<sub>3</sub>)

150.06  
138.54  
134.10  
130.26  
118.97  
114.84  
81.16  
80.88  
58.44  
56.61  
53.91  
53.45  
52.05  
49.24  
36.61  
33.69  
33.16  
31.97  
12.22

Current Data Parameters  
NAME kawai 400AN  
EXPNO 3  
PROCNO 1

F2 - Acquisition Parameters  
Date\_ 20210309  
Time\_ 11.42 h  
INSTRUM Avance  
PROBHD Z163739\_0304 (  
PULPROG zgpg30  
TD 65536  
SOLVENT CDCl3  
NS 3000  
DS 2  
SWH 25000.000 Hz  
FIDRES 0.762939 Hz  
AQ 1.3107200 sec  
RG 101  
DW 20.000 usec  
DE 8.64 usec  
TE 300.0 K  
D1 1.50000000 sec  
D11 0.03000000 sec  
TD0 1  
SFO1 100.6241209 MHz  
NUC1 13C  
P0 2.67 usec  
P1 8.00 usec  
PLW1 92.79299927 W  
SFO2 400.1326008 MHz  
NUC2 1H  
CPDPRG[2] waltz16  
PCPD2 90.00 usec  
PLW2 22.60000038 W  
PLW12 0.17857000 W  
PLW13 0.08981800 W

F2 - Processing parameters  
SI 65536  
SF 100.6127543 MHz  
WDW EM  
SSB 0  
LB 1.00 Hz  
GB 0  
PC 1.40

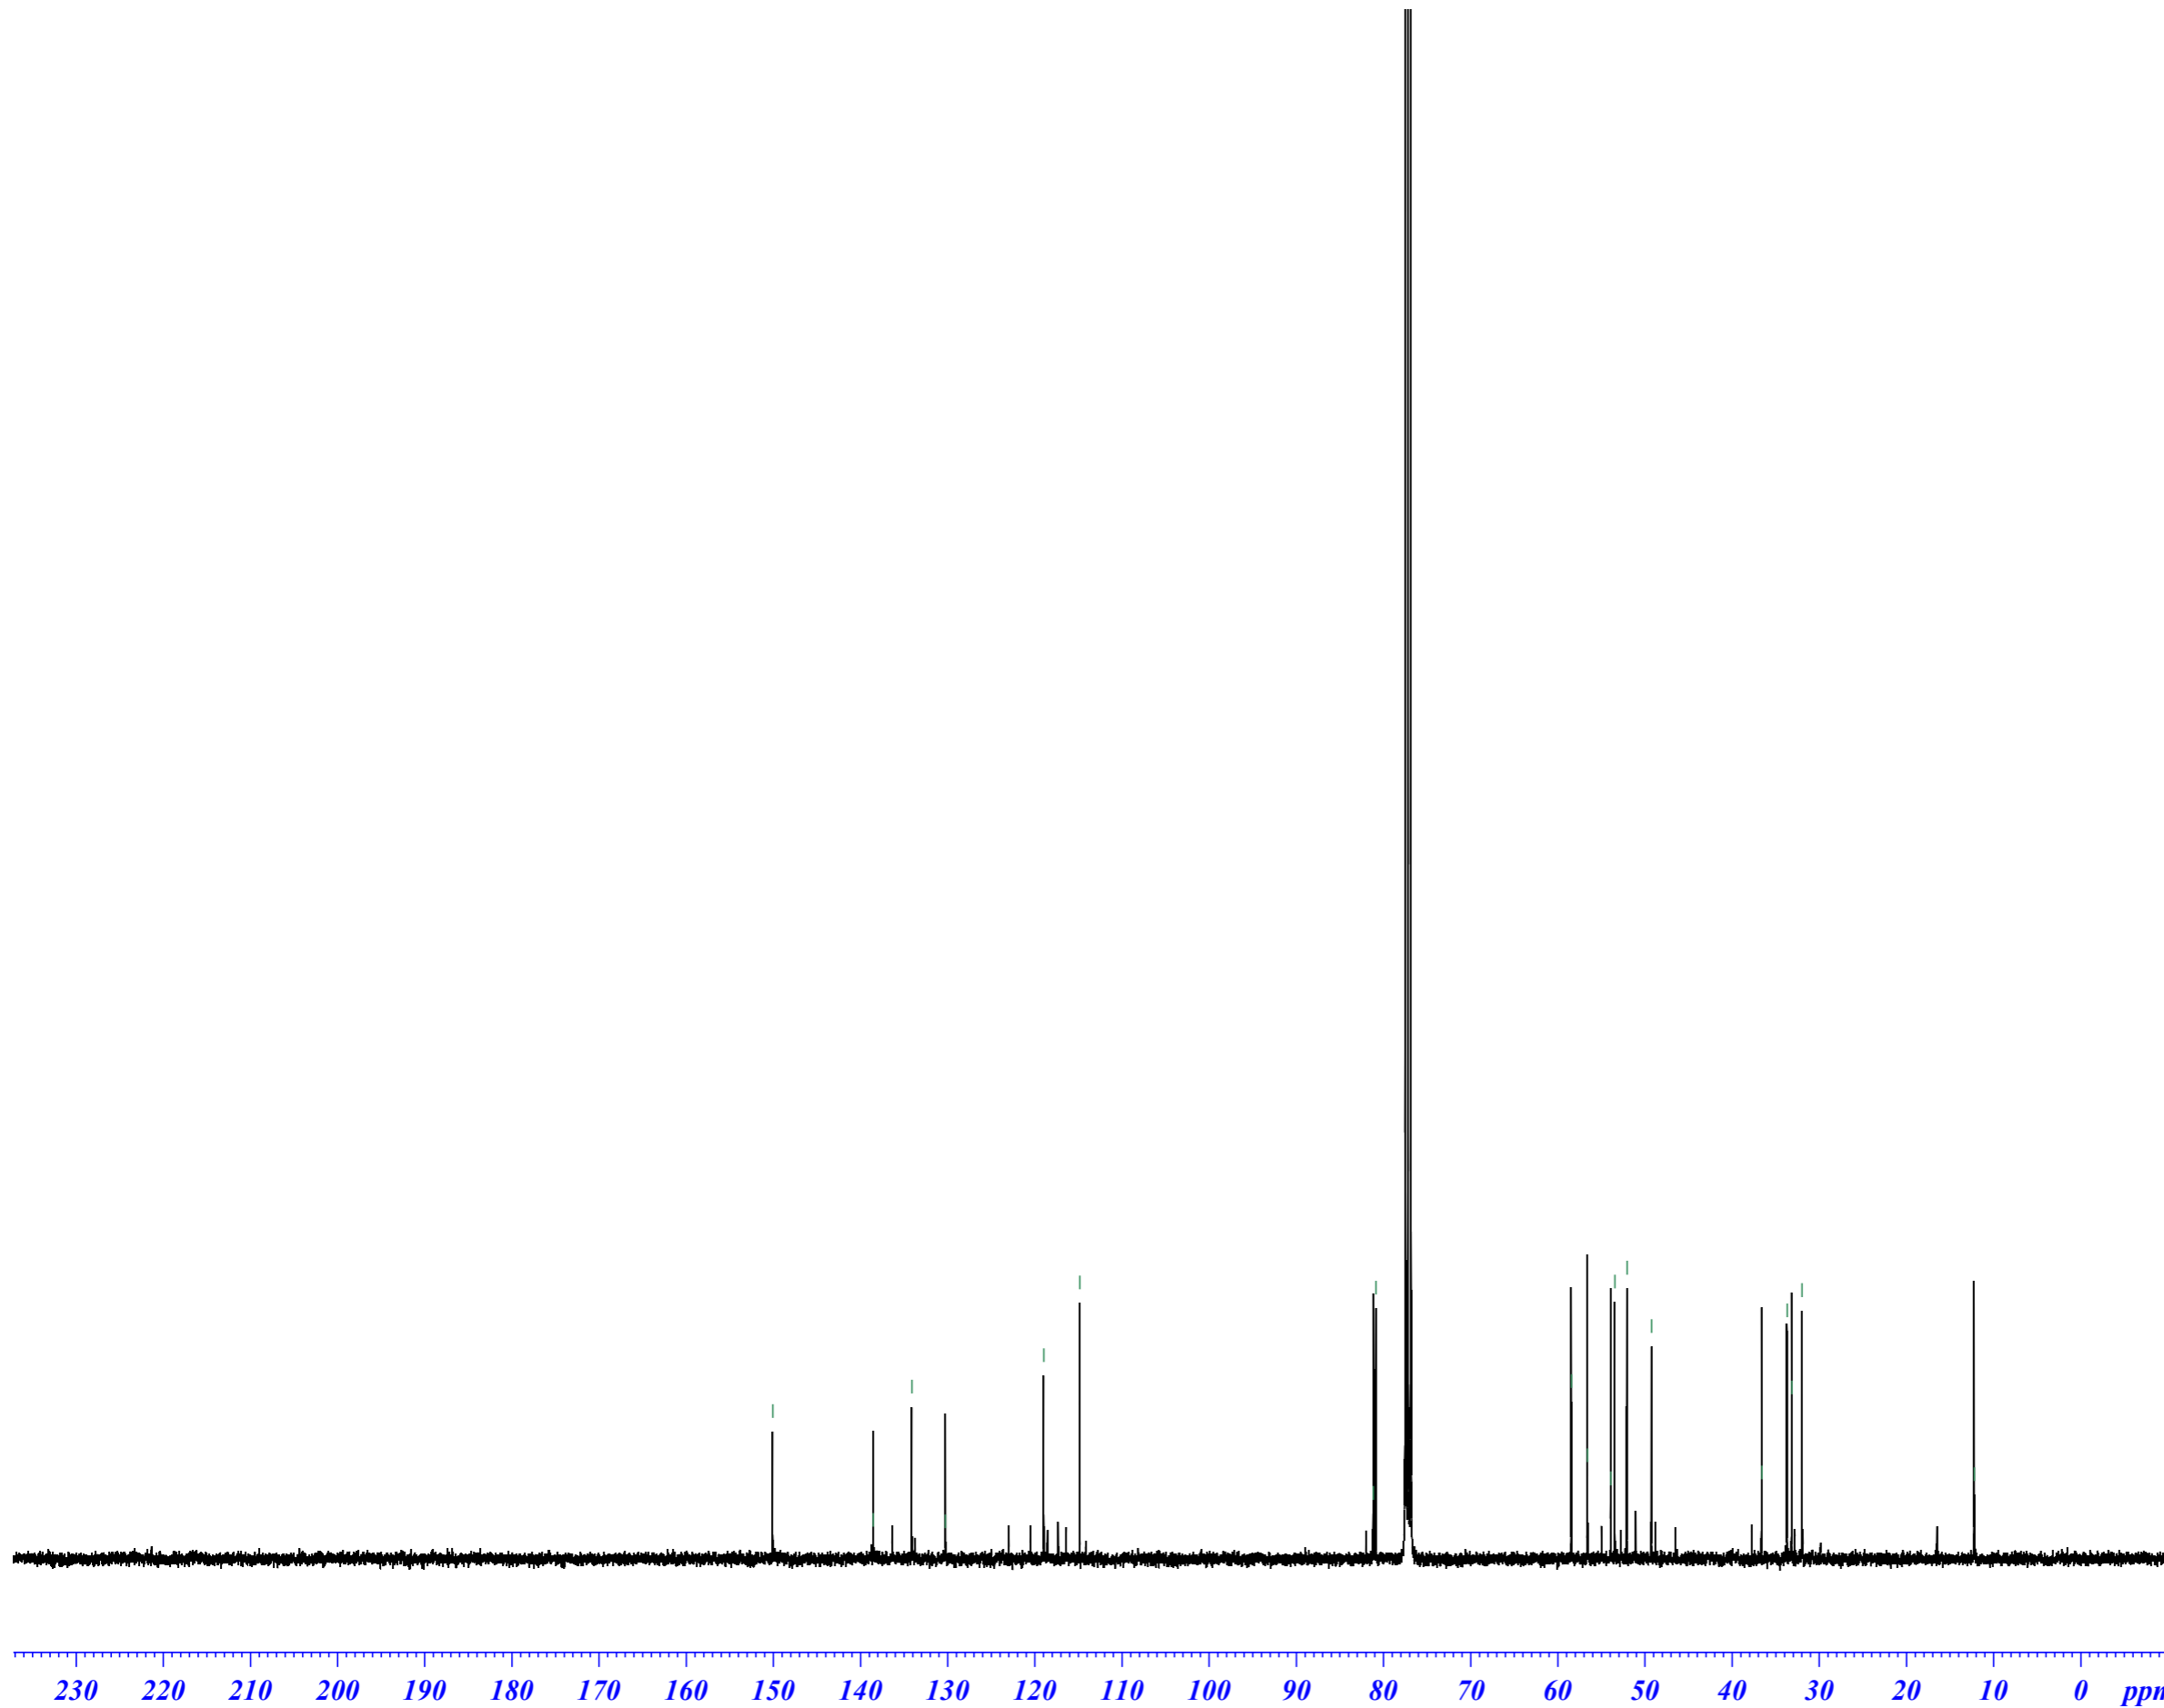

S39

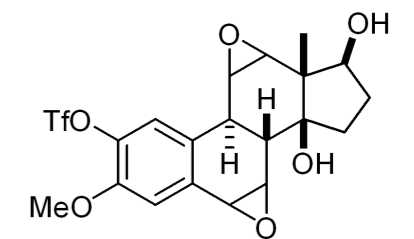

15

<sup>13</sup>C NMR (100 MHz, CDCl<sub>3</sub>)

Current Data Parameters  
 NAME kawaiB400  
 EXPNO 338  
 PROCNO 1

F2 - Acquisition Parameters  
 Date\_ 20201224  
 Time\_ 14.08  
 INSTRUM spect  
 PROBHD 5 mm QNP 1H/13  
 PULPROG zg30  
 TD 65536  
 SOLVENT MeOD  
 NS 16  
 DS 2  
 SWH 8278.146 Hz  
 FIDRES 0.126314 Hz  
 AQ 3.9583745 sec  
 RG 1024  
 DW 60.400 usec  
 DE 6.50 usec  
 TE 296.2 K  
 D1 1.0000000 sec  
 TD0 1

==== CHANNEL f1 =====

NUC1 1H  
 P1 15.00 usec  
 PL1 10.30 dB  
 SFO1 400.1324710 MHz

F2 - Processing parameters  
 SI 32768  
 SF 400.1300075 MHz  
 WDW EM  
 SSB 0  
 LB 0.30 Hz  
 GB 0  
 PC 1.00

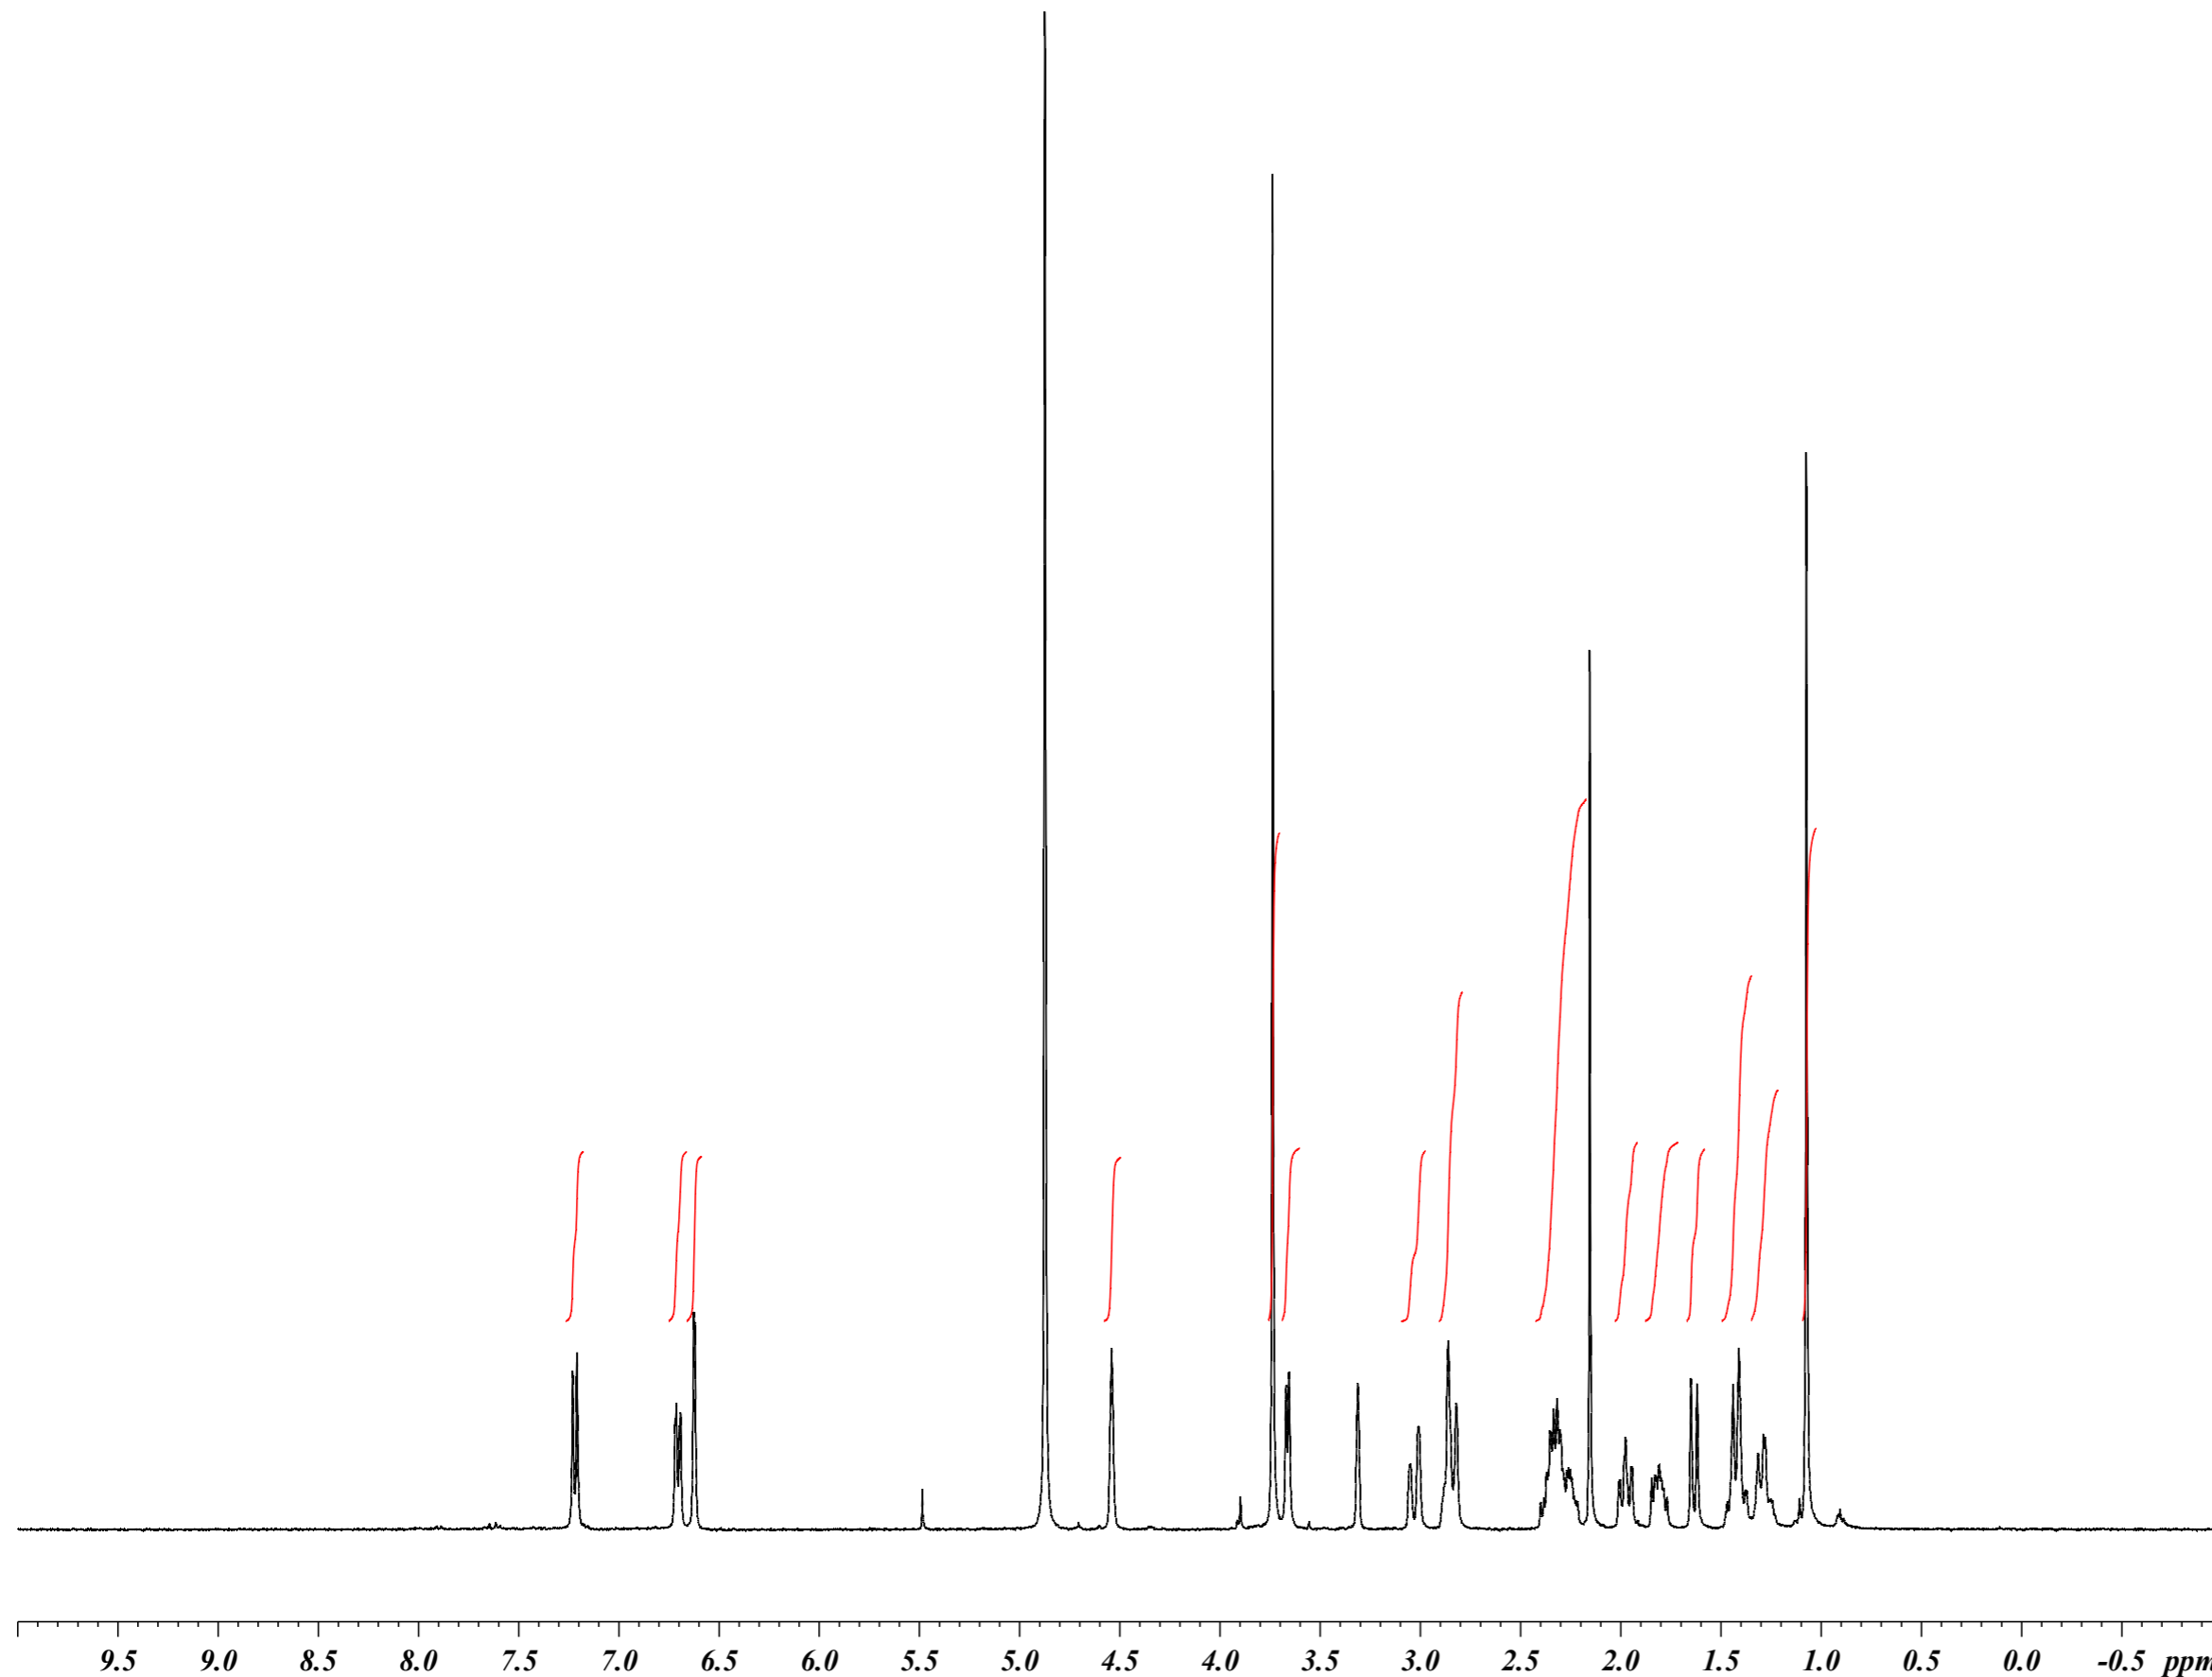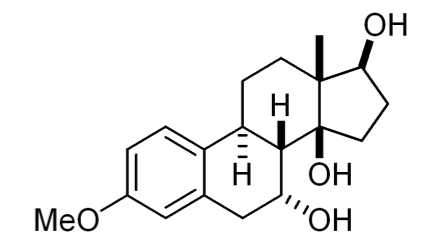

**2b**

<sup>1</sup>H NMR (400 MHz, CD<sub>3</sub>OD)



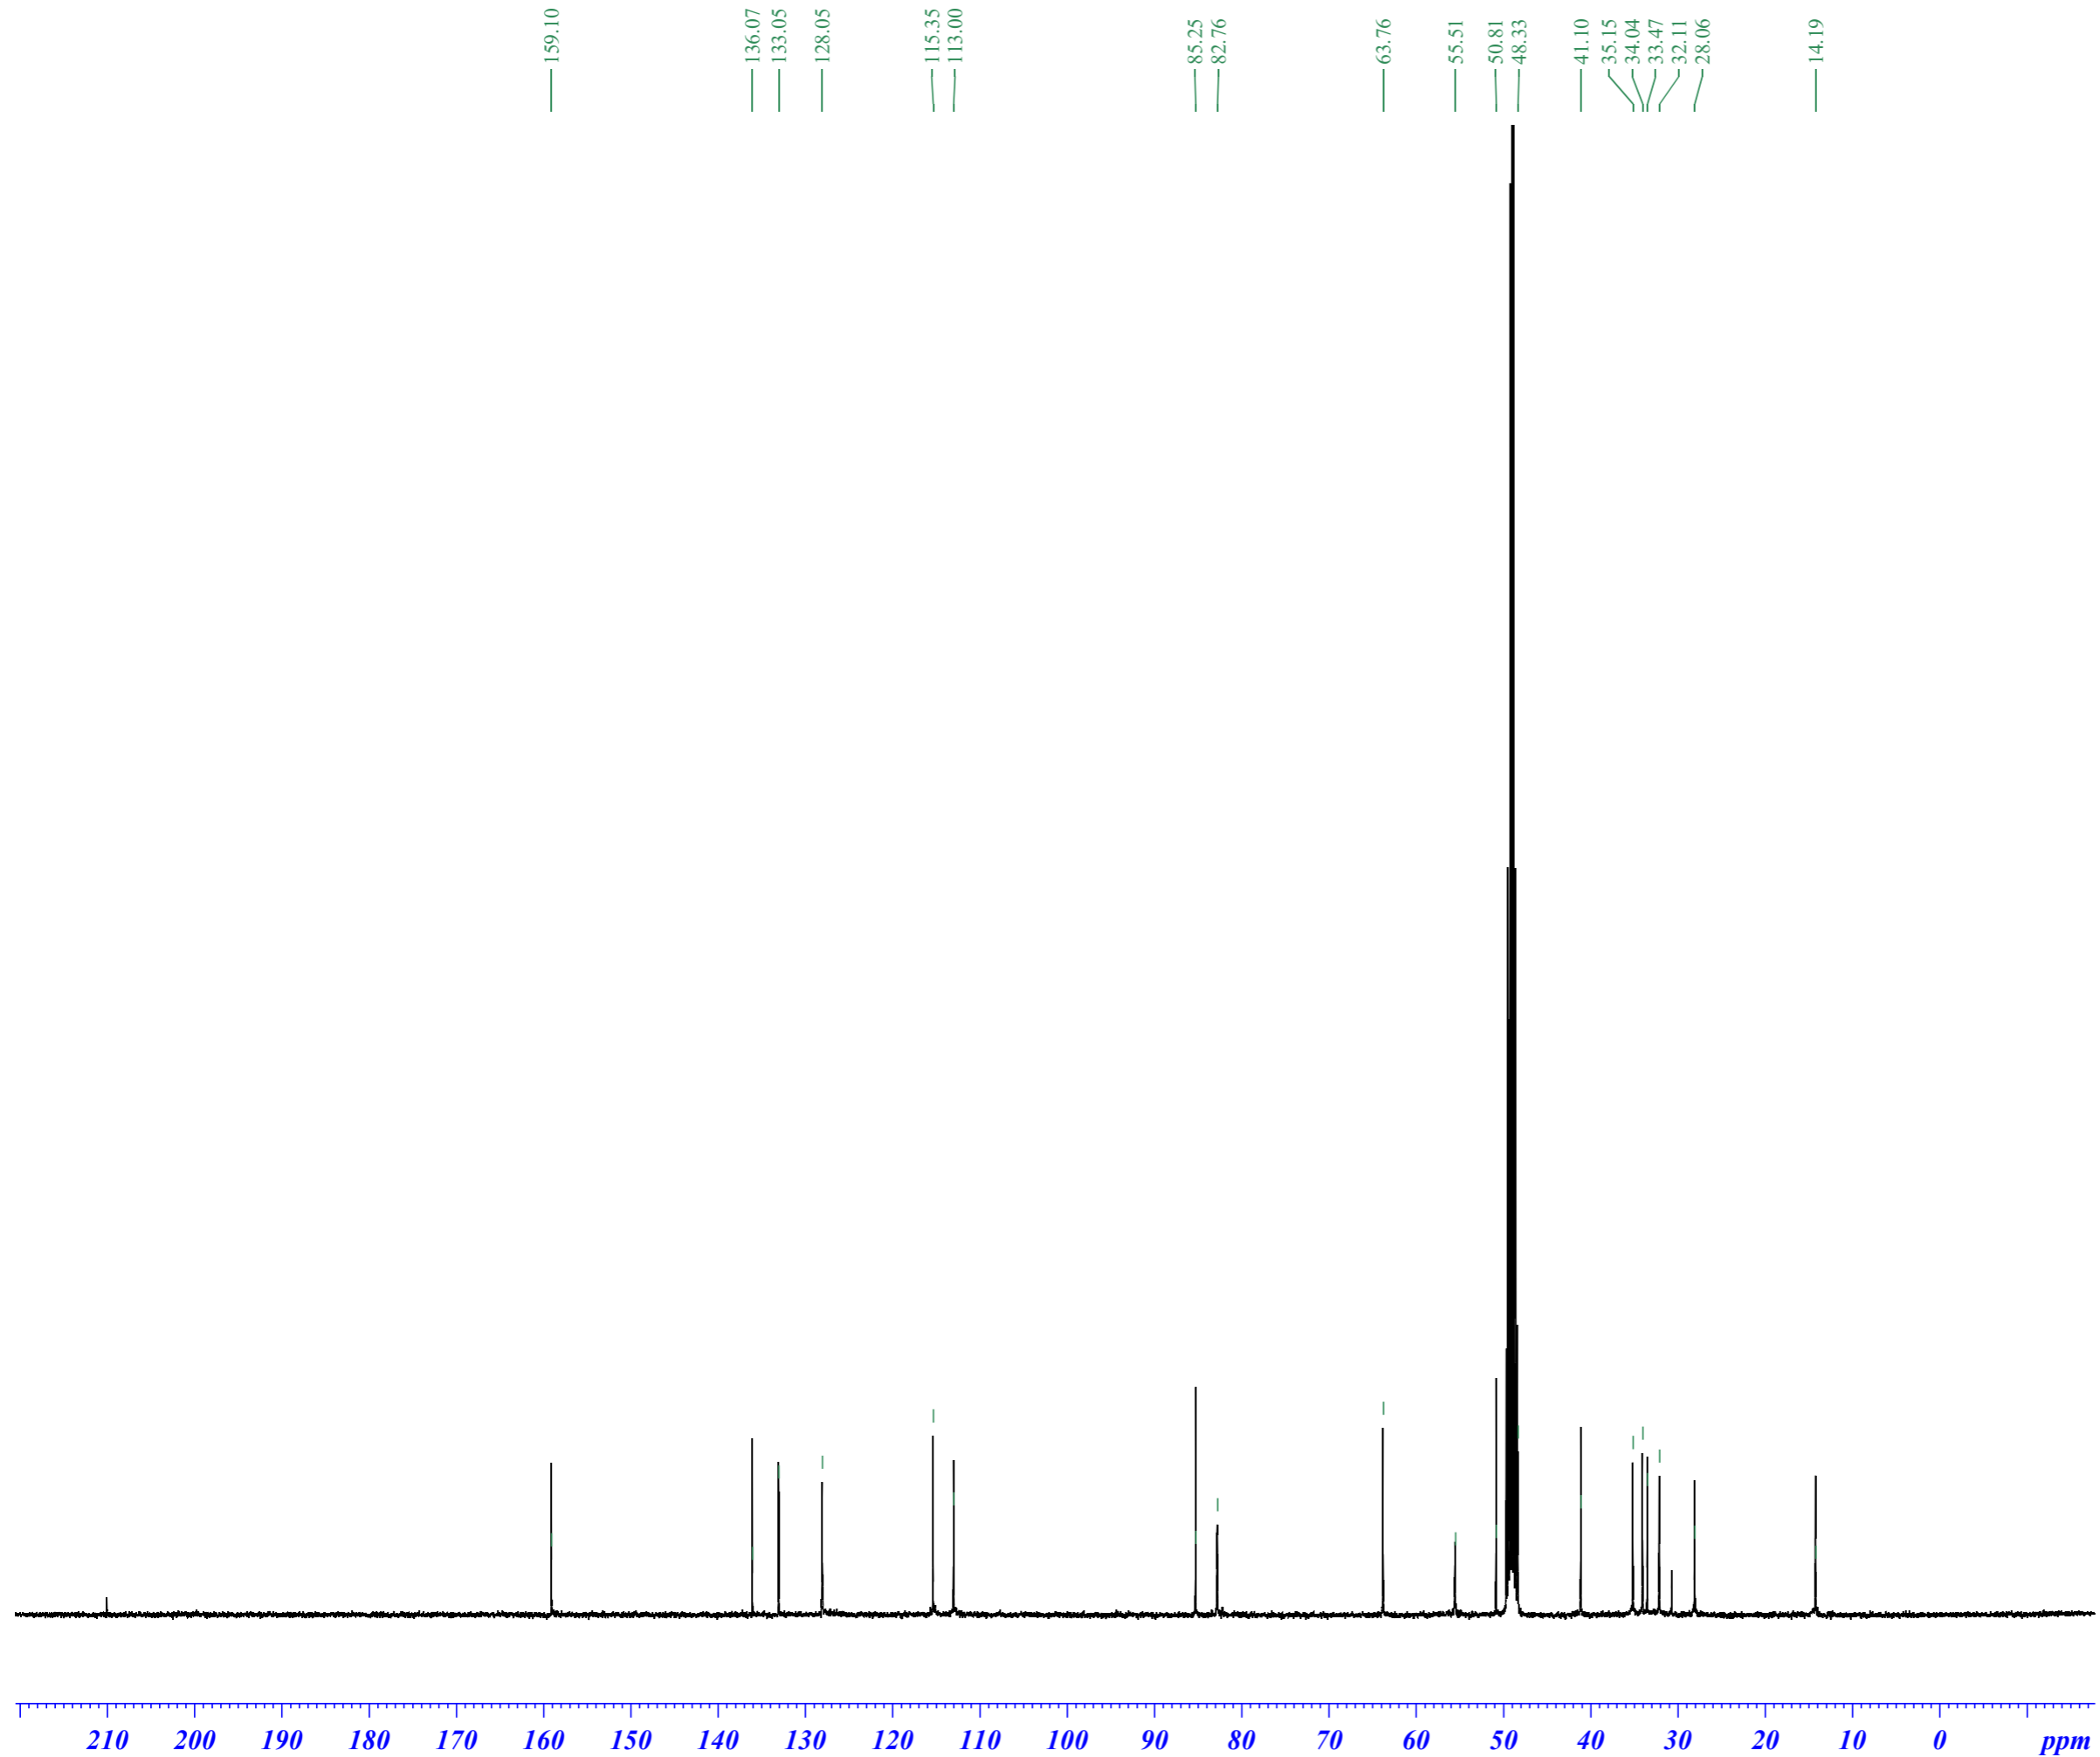

Current Data Parameters  
 NAME kawaiB400  
 EXPNO 339  
 PROCNO 1

F2 - Acquisition Parameters  
 Date\_ 20201224  
 Time\_ 15.38  
 INSTRUM spect  
 PROBHD 5 mm QNP 1H/13  
 PULPROG zgpg30  
 TD 65536  
 SOLVENT MeOD  
 NS 2000  
 DS 4  
 SWH 23980.814 Hz  
 FIDRES 0.365918 Hz  
 AQ 1.3664256 sec  
 RG 1625.5  
 DW 20.850 usec  
 DE 6.50 usec  
 TE 296.2 K  
 D1 1.20000005 sec  
 D11 0.03000000 sec  
 TD0 1

===== CHANNEL f1 =====  
 NUC1 13C  
 P1 12.00 usec  
 PL1 7.50 dB  
 SFO1 100.6228298 MHz

===== CHANNEL f2 =====  
 CPDPRG[2] waltz16  
 NUC2 1H  
 PCPD2 90.00 usec  
 PL2 10.30 dB  
 PL12 20.00 dB  
 PL13 20.00 dB  
 SFO2 400.1316005 MHz

F2 - Processing parameters  
 SI 32768  
 SF 100.6126301 MHz  
 WDW EM  
 SSB 0  
 LB 1.00 Hz  
 GB 0  
 PC 1.40

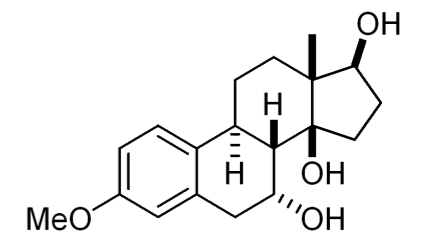**2b**<sup>13</sup>C NMR (100 MHz, CD<sub>3</sub>OD)

Current Data Parameters  
NAME kawaiB400  
EXPNO 155  
PROCNO 1

F2 - Acquisition Parameters  
Date\_ 20190830  
Time\_ 2.19  
INSTRUM spect  
PROBHD 5 mm QNP 1H/13  
PULPROG noesyph  
TD 2048  
SOLVENT MeOD  
NS 48  
DS 2  
SWH 3453.039 Hz  
FIDRES 1.686054 Hz  
AQ 0.2965504 sec  
RG 256  
DW 144.800 usec  
DE 6.50 usec  
TE 297.2 K  
D0 0.00012570 sec  
D1 2.00000000 sec  
D8 0.60000002 sec  
IN0 0.00028960 sec

==== CHANNEL f1 =====  
NUC1 1H  
P1 15.00 usec  
PL1 10.30 dB  
SFO1 400.1315425 MHz

F1 - Acquisition parameters  
TD 128  
SFO1 400.1315 MHz  
FIDRES 53.953728 Hz  
SW 8.630 ppm  
FnMODE States-TPPI

F2 - Processing parameters  
SI 1024  
SF 400.130068 MHz  
WDW QSINE  
SSB 2  
LB 0 Hz  
GB 0  
PC 1.00

F1 - Processing parameters  
SI 1024  
MC2 States-TPPI  
SF 400.130092 MHz  
WDW QSINE  
SSB 2  
LB 0 Hz  
GB 0

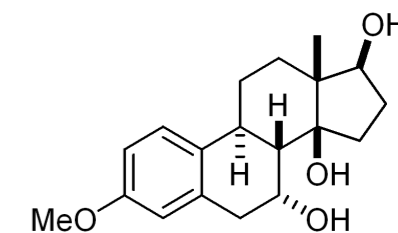

**2b**

NOESY (CD<sub>3</sub>OD)

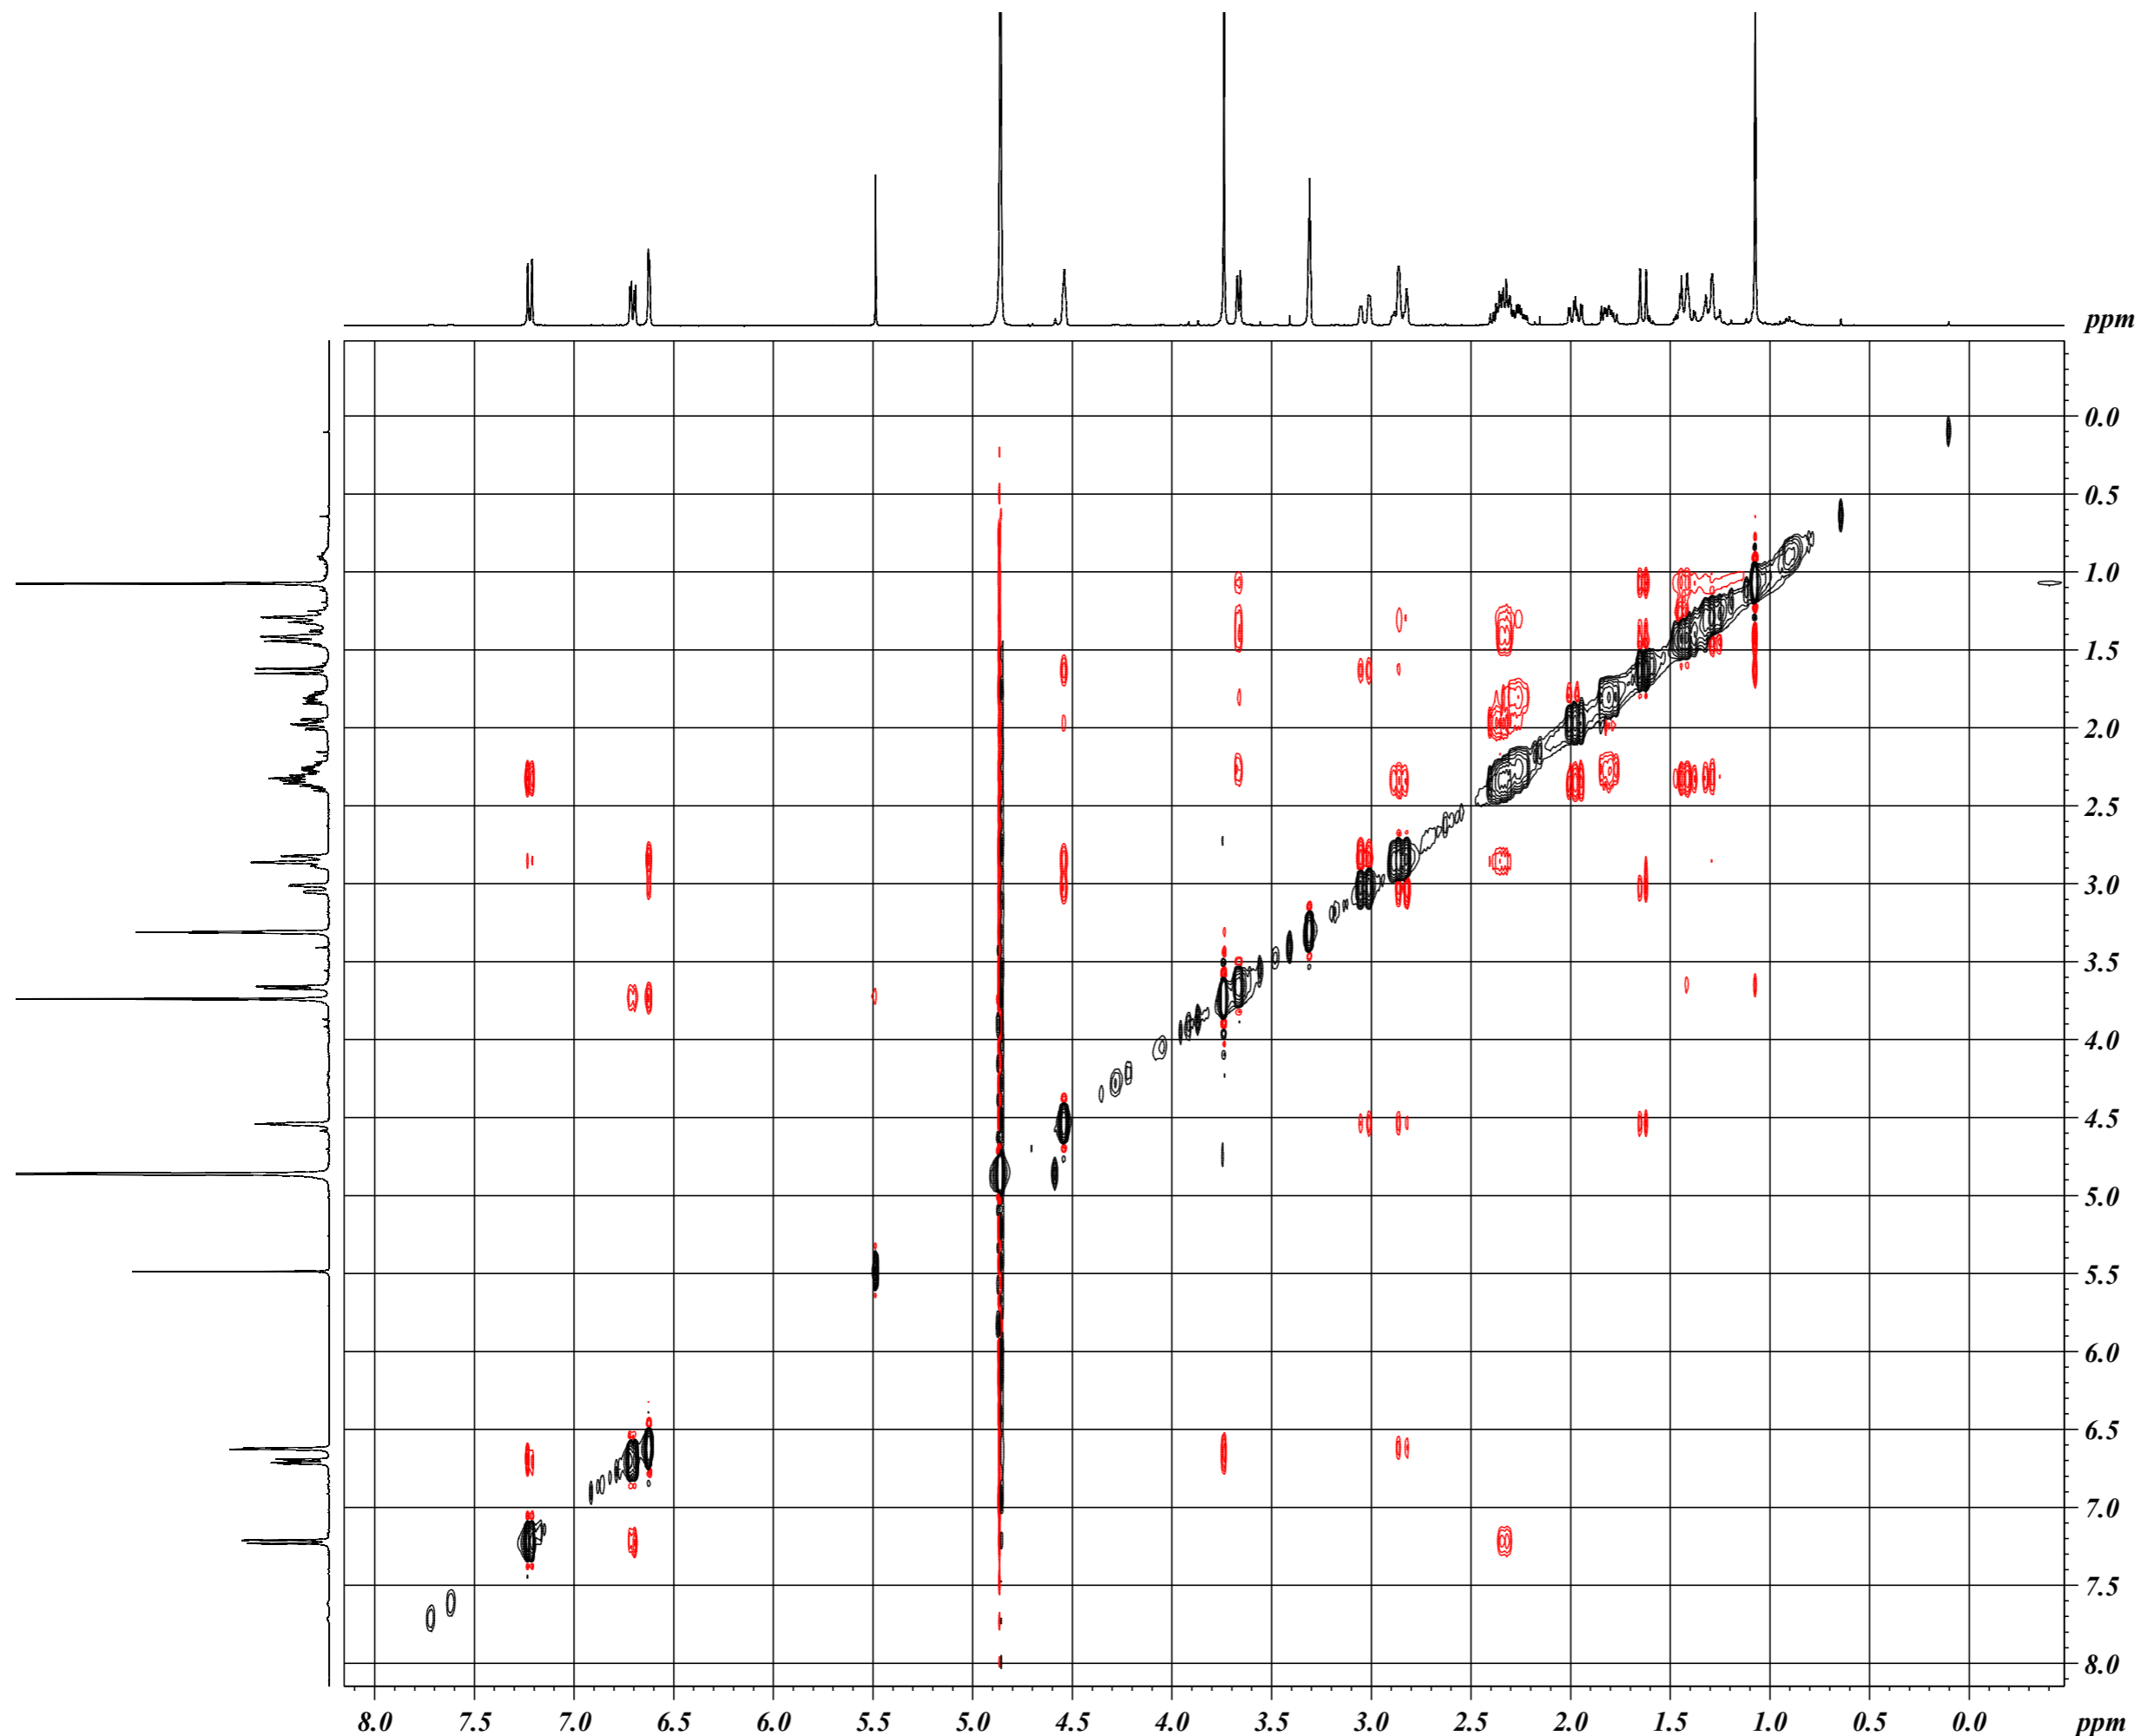

**Current Data Parameters**  
 NAME kawaiB400-2  
 EXPNO 16  
 PROCNO 1

**F2 - Acquisition Parameters**  
 Date\_ 20210303  
 Time\_ 12.55 h  
 INSTRUM spect  
 PROBHD 5 mm QNP 1H/13  
 PULPROG zg30  
 TD 65536  
 SOLVENT CDCl3  
 NS 16  
 DS 2  
 SWH 8278.146 Hz  
 FIDRES 0.252629 Hz  
 AQ 3.9583745 sec  
 RG 512  
 DW 60.400 usec  
 DE 6.50 usec  
 TE 295.5 K  
 D1 1.0000000 sec  
 TD0 1  
 SFO1 400.1324710 MHz  
 NUC1 1H  
 P1 15.00 usec

**F2 - Processing parameters**  
 SI 32768  
 SF 400.1300095 MHz  
 WDW EM  
 SSB 0  
 LB 0.30 Hz  
 GB 0  
 PC 1.00

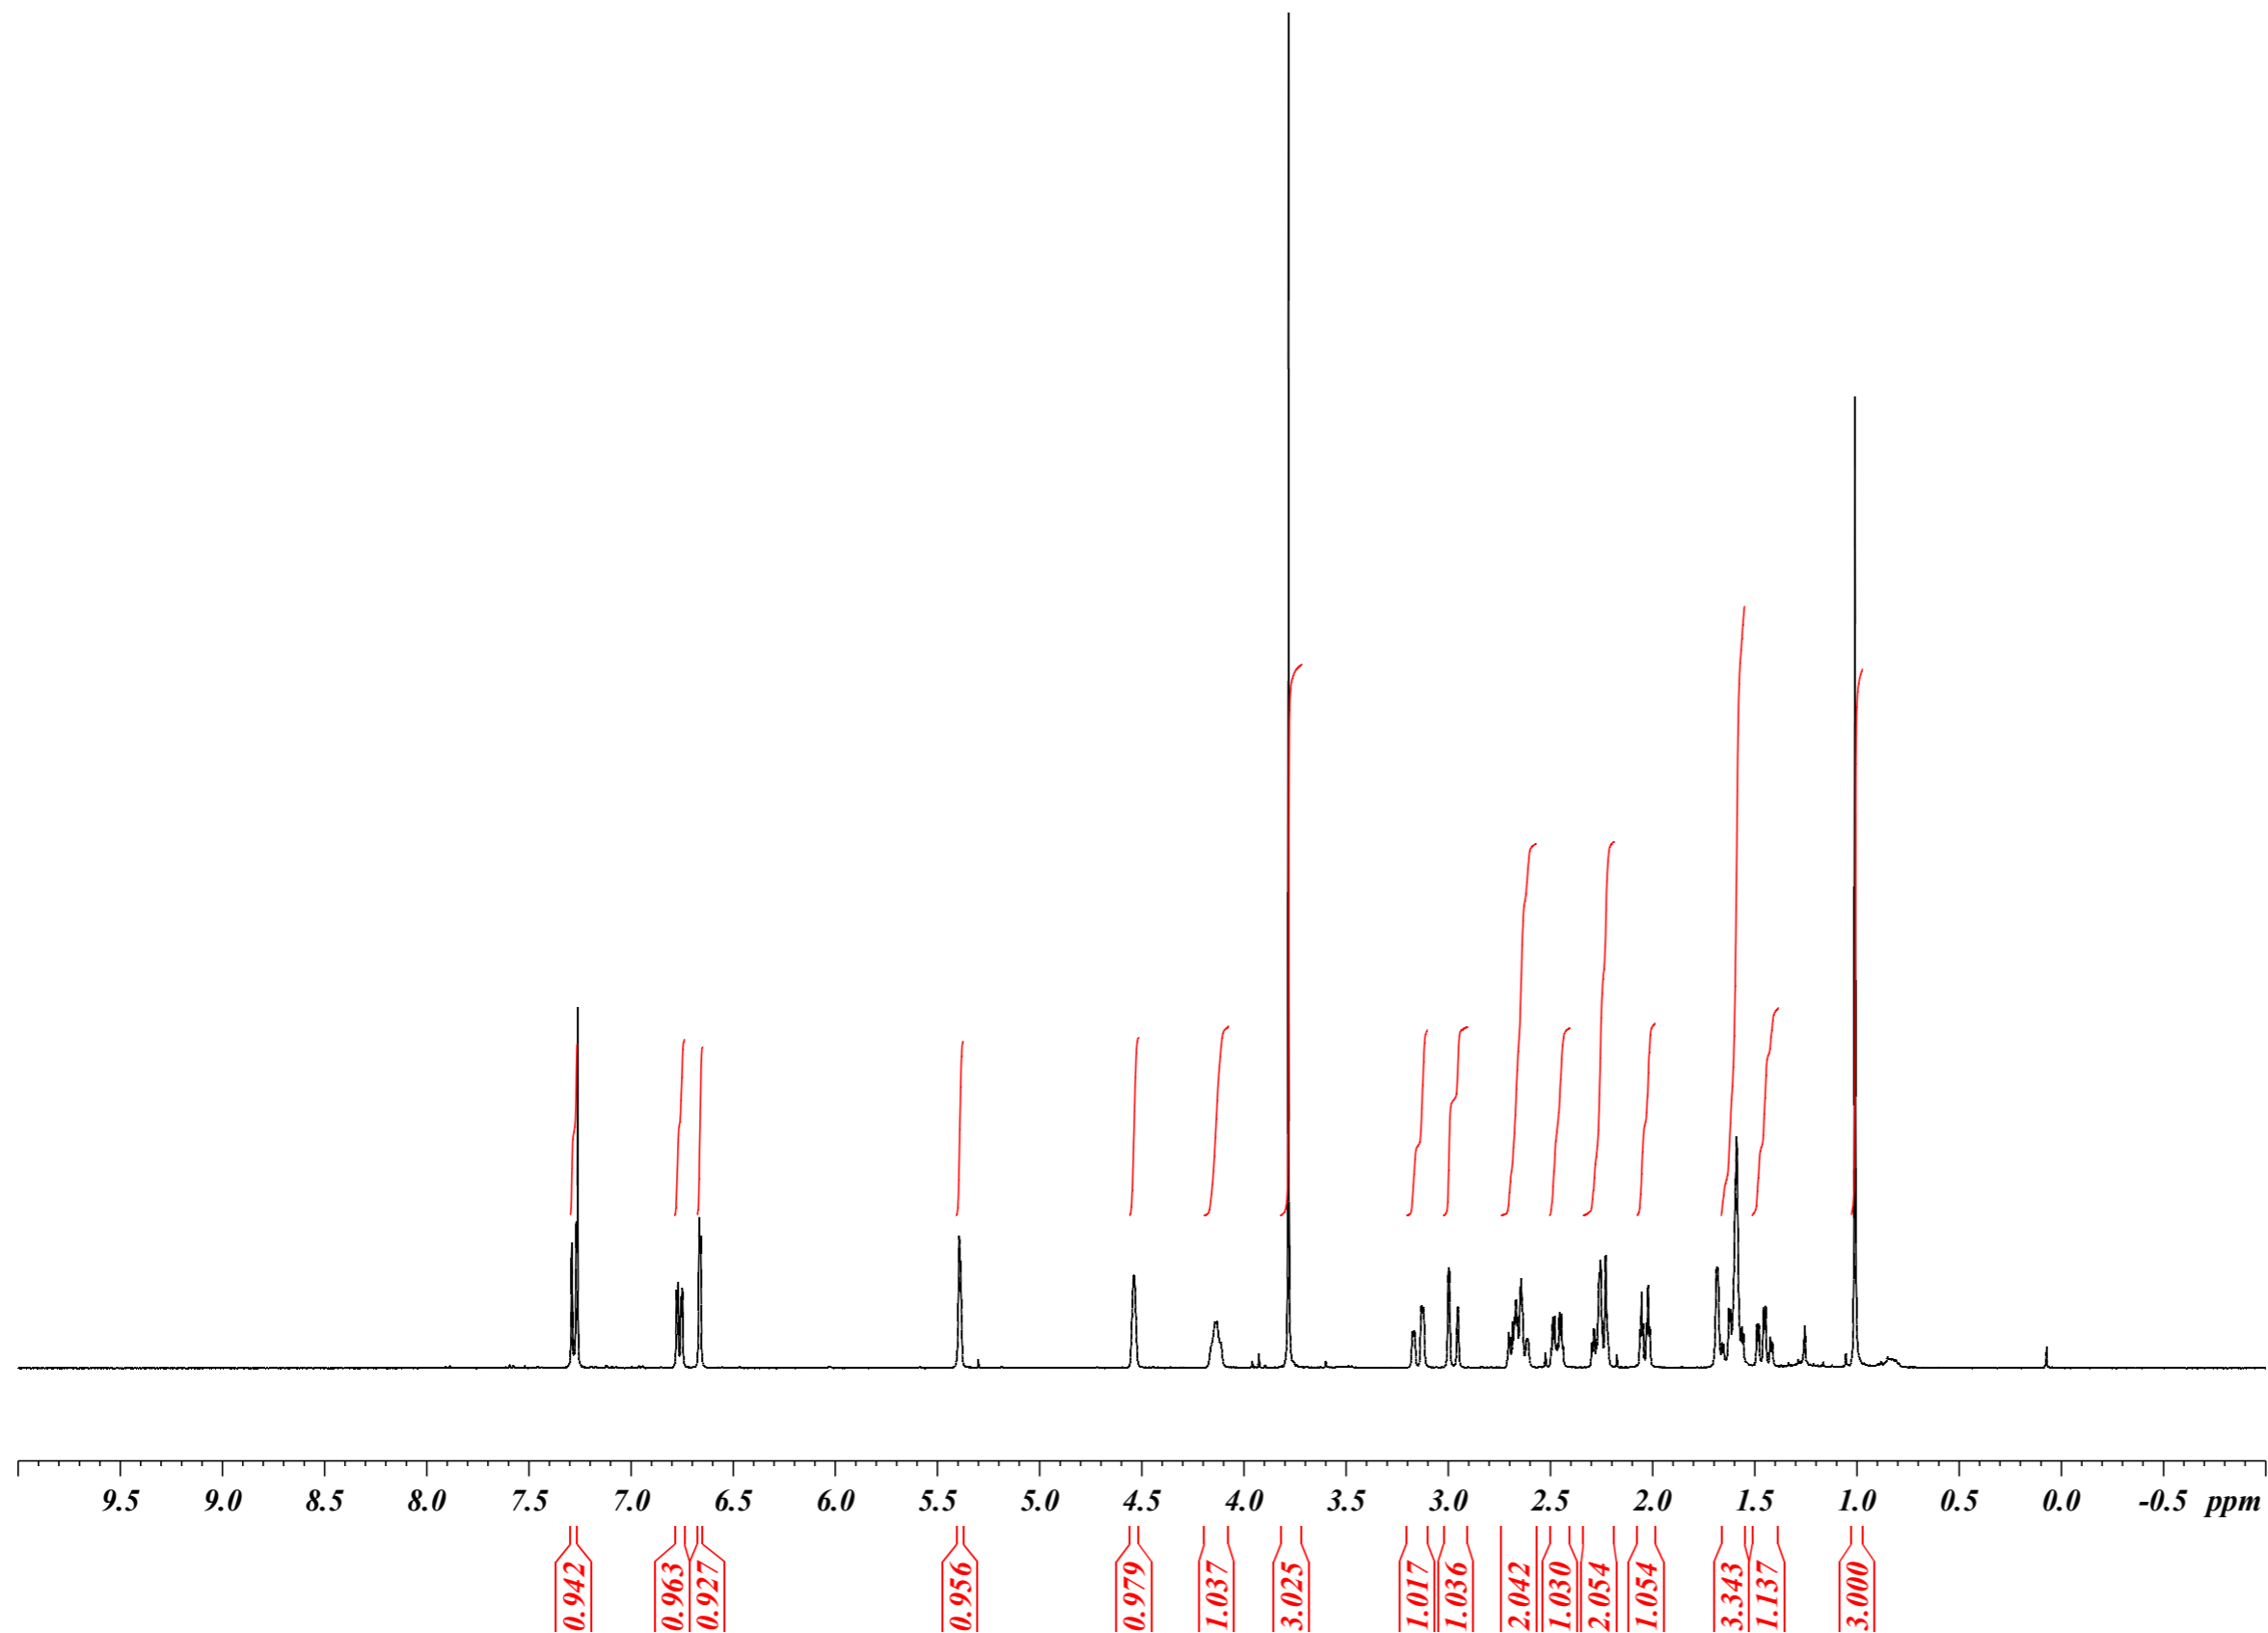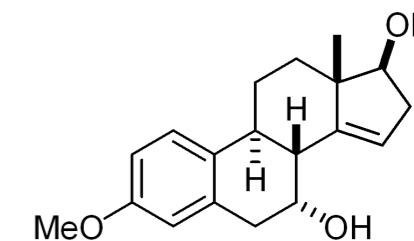

16

<sup>1</sup>H NMR (400 MHz, CDCl<sub>3</sub>)

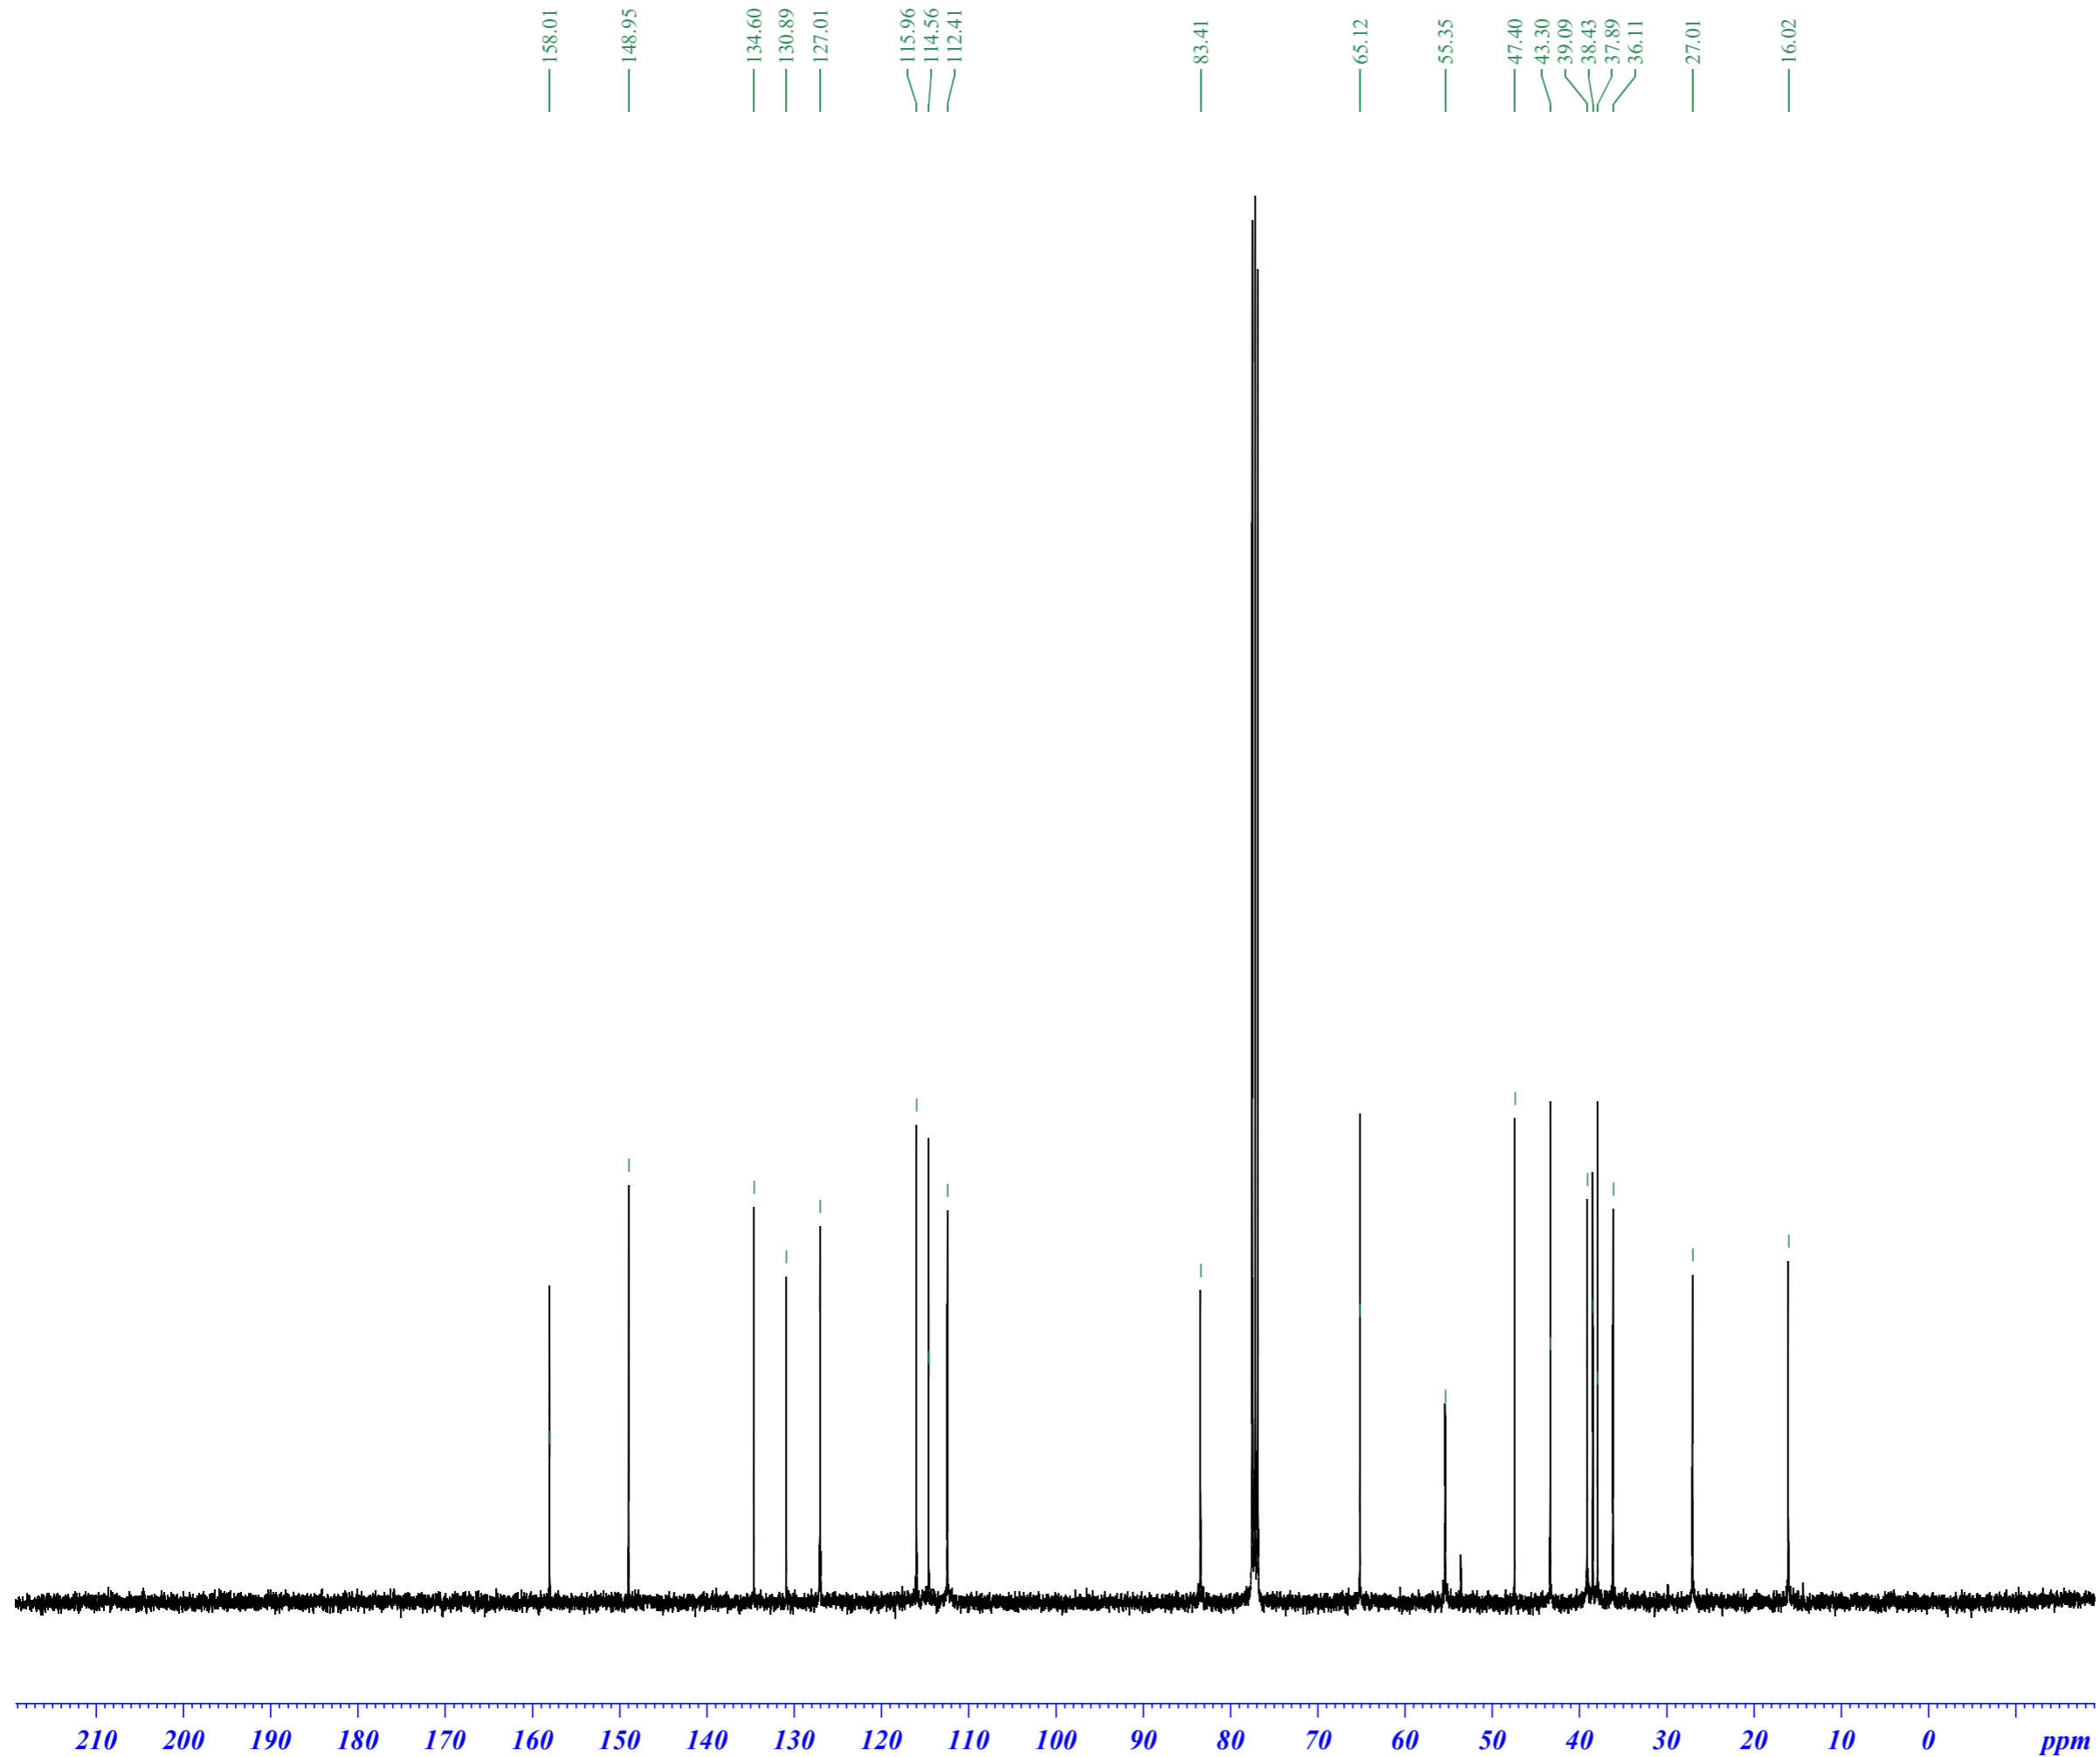

Current Data Parameters  
 NAME kawaiB400  
 EXPNO 350  
 PROCNO 1

F2 - Acquisition Parameters  
 Date\_ 20201228  
 Time\_ 14.36  
 INSTRUM spect  
 PROBHD 5 mm QNP 1H/13  
 PULPROG zgpg30  
 TD 65536  
 SOLVENT CDCl3  
 NS 1200  
 DS 4  
 SWH 23980.814 Hz  
 FIDRES 0.365918 Hz  
 AQ 1.3664256 sec  
 RG 645.1  
 DW 20.850 usec  
 DE 6.50 usec  
 TE 296.2 K  
 D1 1.20000005 sec  
 D11 0.03000000 sec  
 TD0 1

==== CHANNEL f1 =====  
 NUC1 13C  
 P1 12.00 usec  
 PL1 7.50 dB  
 SFO1 100.6228298 MHz

==== CHANNEL f2 =====  
 CPDPRG[2] waltz16  
 NUC2 1H  
 PCPD2 90.00 usec  
 PL2 10.30 dB  
 PL12 20.00 dB  
 PL13 20.00 dB  
 SFO2 400.1316005 MHz

F2 - Processing parameters  
 SI 32768  
 SF 100.6127598 MHz  
 WDW EM  
 SSB 0  
 LB 1.00 Hz  
 GB 0  
 PC 1.40

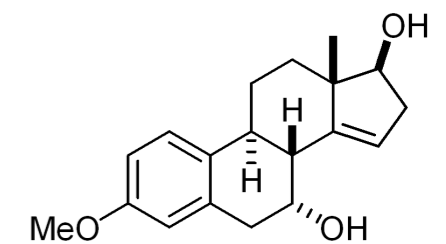

**16**  
<sup>13</sup>C NMR (100 MHz, CDCl<sub>3</sub>)

2148 20 12 28

Current Data Parameters  
NAME kawaiB400  
EXPNO 349  
PROCNO 1

F2 - Acquisition Parameters  
Date\_ 20201228  
Time 13.26  
INSTRUM spect  
PROBHD 5 mm QNP 1H/13  
PULPROG cosygpgf  
TD 2048  
SOLVENT CDCl3  
NS 2  
DS 16  
SWH 3633.721 Hz  
FIDRES 1.774278 Hz  
AQ 0.2818048 sec  
RG 7298.2  
DW 137.600 usec  
DE 6.50 usec  
TE 296.2 K  
D0 0.0000300 sec  
D1 1.48689198 sec  
D13 0.0000400 sec  
D16 0.00020000 sec  
IN0 0.00027520 sec

==== CHANNEL f1 =====  
NUC1 1H  
P0 15.00 usec  
P1 15.00 usec  
PL1 10.30 dB  
SFO1 400.1317249 MHz

==== GRADIENT CHANNEL =====  
GPNAM[1] SINE.100  
GPZ1 10.00 %  
P16 1000.00 usec

F1 - Acquisition parameters  
TD 256  
SFO1 400.1317 MHz  
FIDRES 28.388441 Hz  
SW 9.081 ppm  
FnMODE QF

F2 - Processing parameters  
SI 1024  
SF 400.1300112 MHz  
WDW SINE  
SSB 0  
LB 0 Hz  
GB 0  
PC 1.40

F1 - Processing parameters  
SI 1024  
MC2 QF  
SF 400.1300109 MHz  
WDW SINE  
SSB 0  
LB 0 Hz  
GB 0

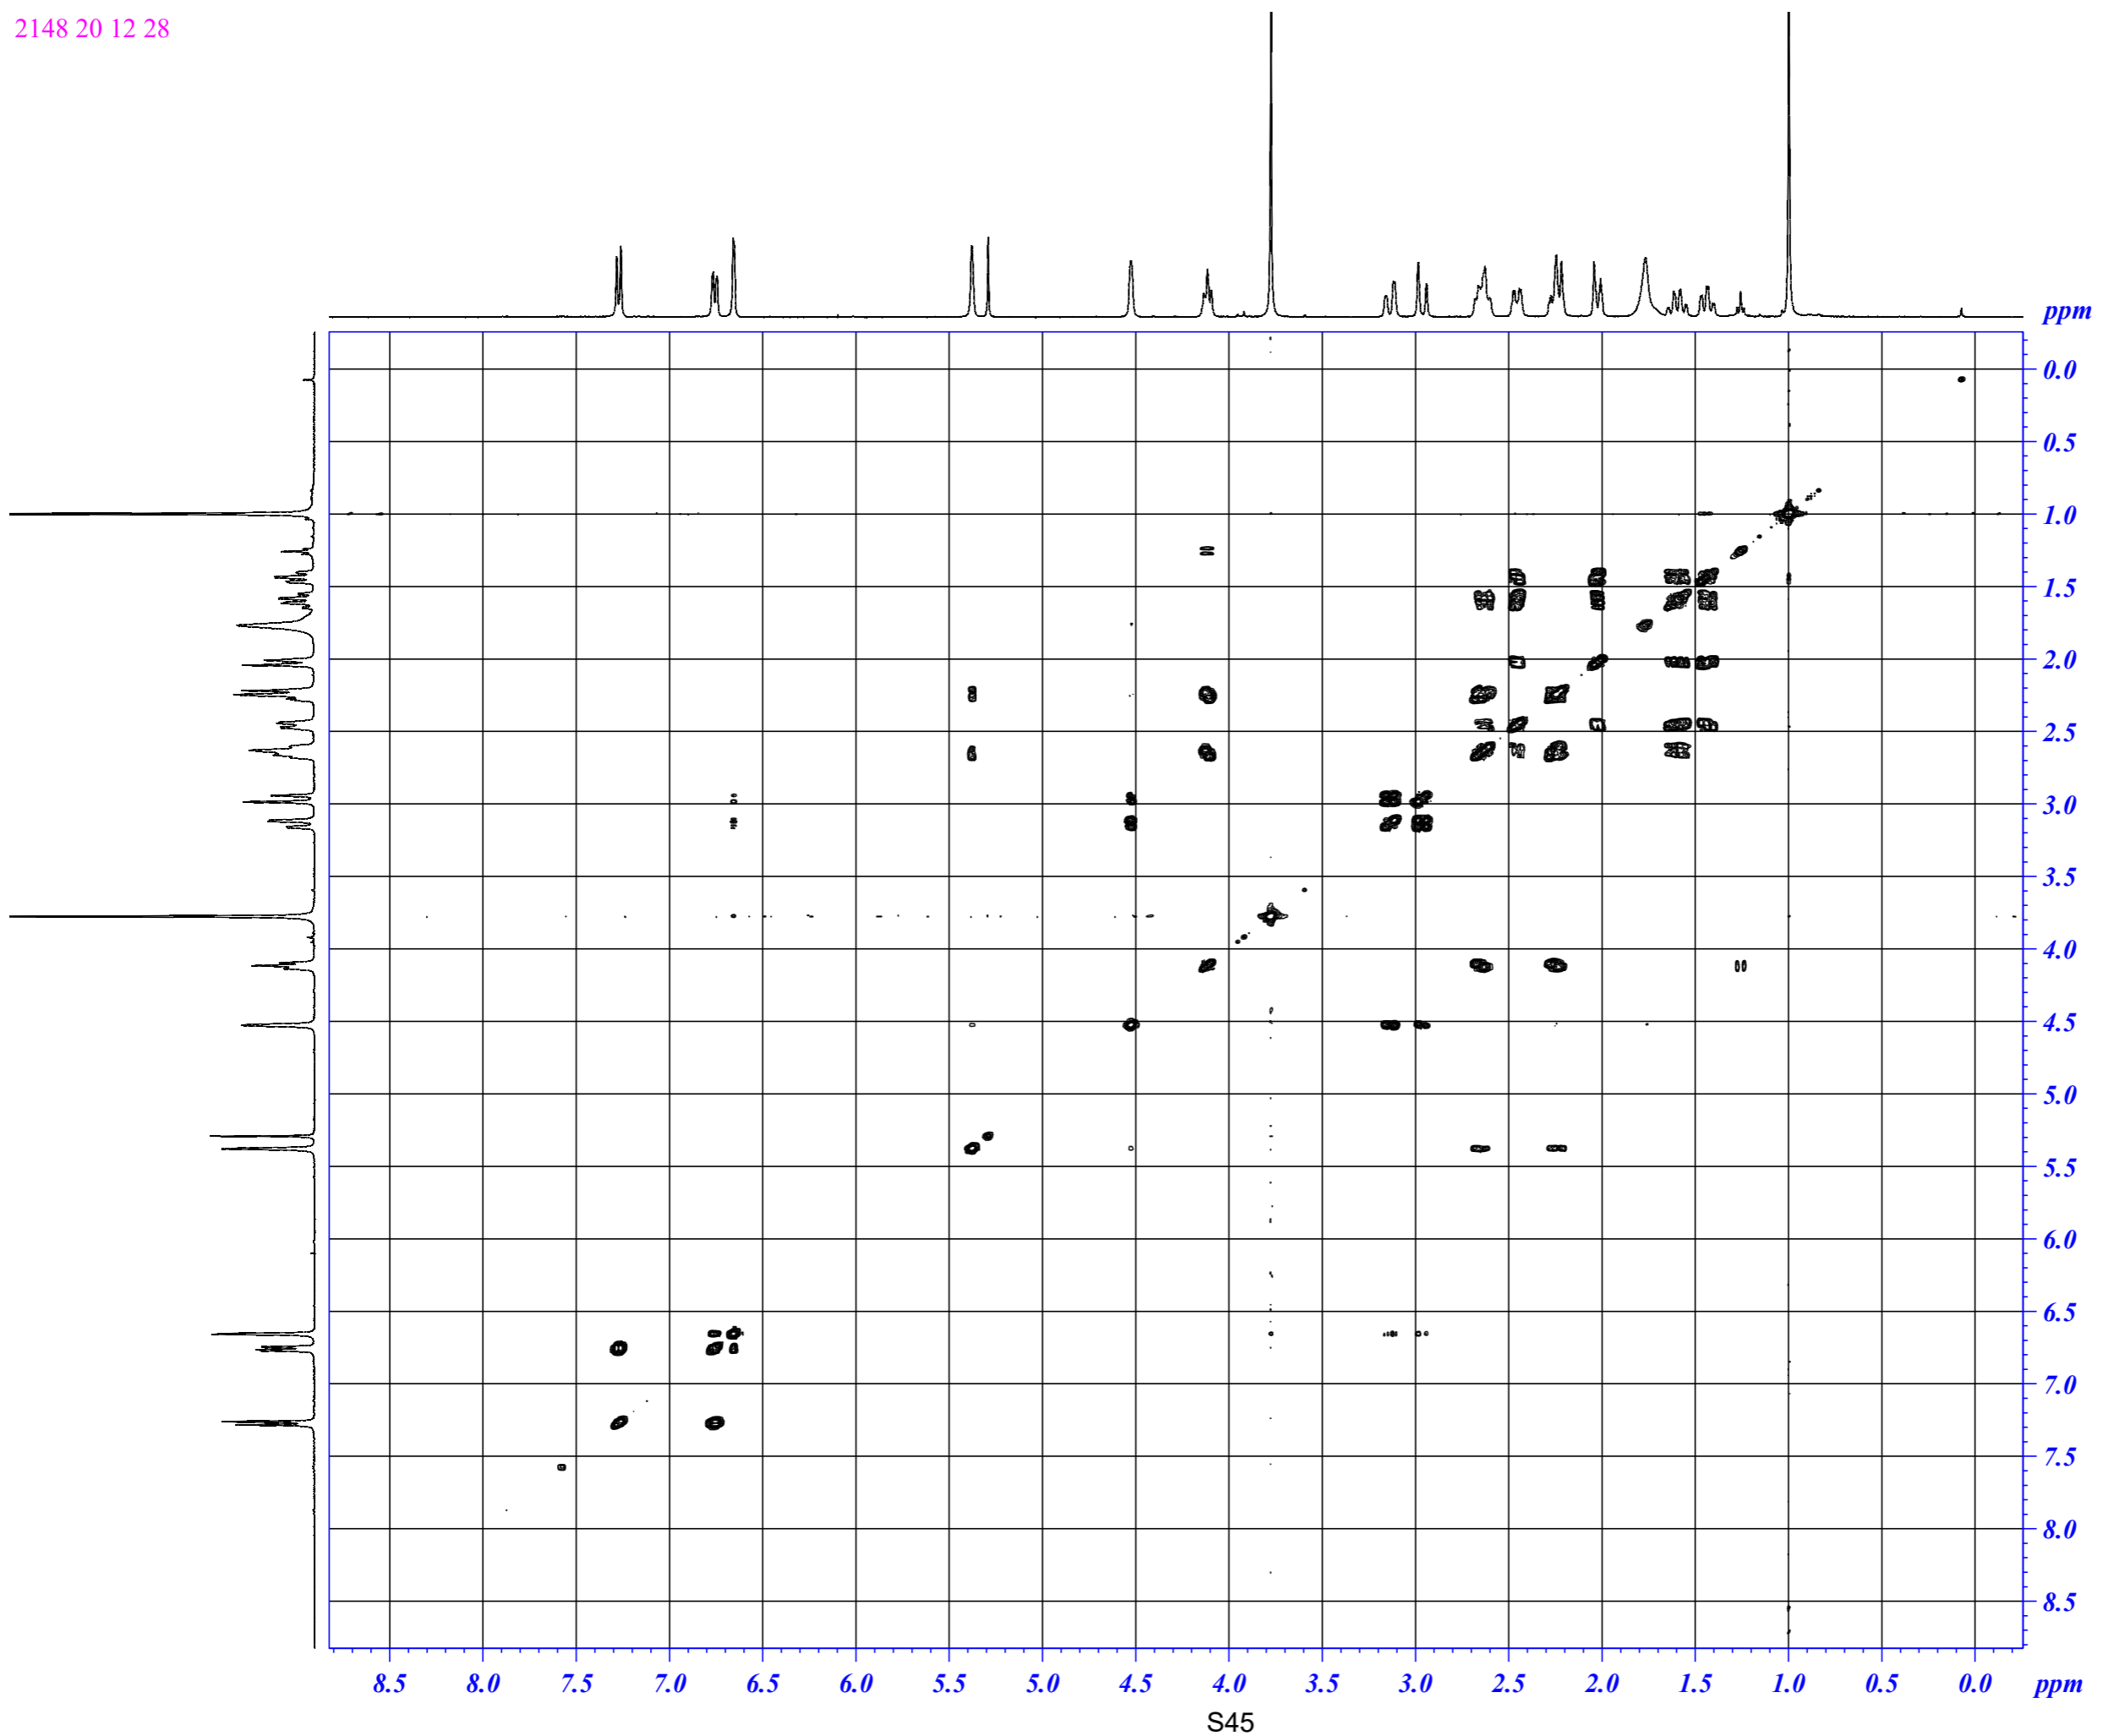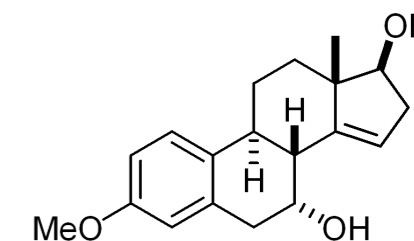

16

COSY (CDCl<sub>3</sub>)

**Current Data Parameters**  
 NAME kawaiB400  
 EXPNO 382  
 PROCNO 1

**F2 - Acquisition Parameters**  
 Date\_ 20210119  
 Time\_ 14.54 h  
 INSTRUM spect  
 PROBHD 5 mm QNP 1H/13  
 PULPROG zg30  
 TD 65536  
 SOLVENT CDCl3  
 NS 16  
 DS 2  
 SWH 8278.146 Hz  
 FIDRES 0.252629 Hz  
 AQ 3.9583745 sec  
 RG 181  
 DW 60.400 usec  
 DE 6.50 usec  
 TE 295.6 K  
 D1 1.0000000 sec  
 TD0 1  
 SFO1 400.1324710 MHz  
 NUC1 1H  
 P1 15.00 usec

**F2 - Processing parameters**  
 SI 32768  
 SF 400.1300094 MHz  
 WDW EM  
 SSB 0  
 LB 0.30 Hz  
 GB 0  
 PC 1.00

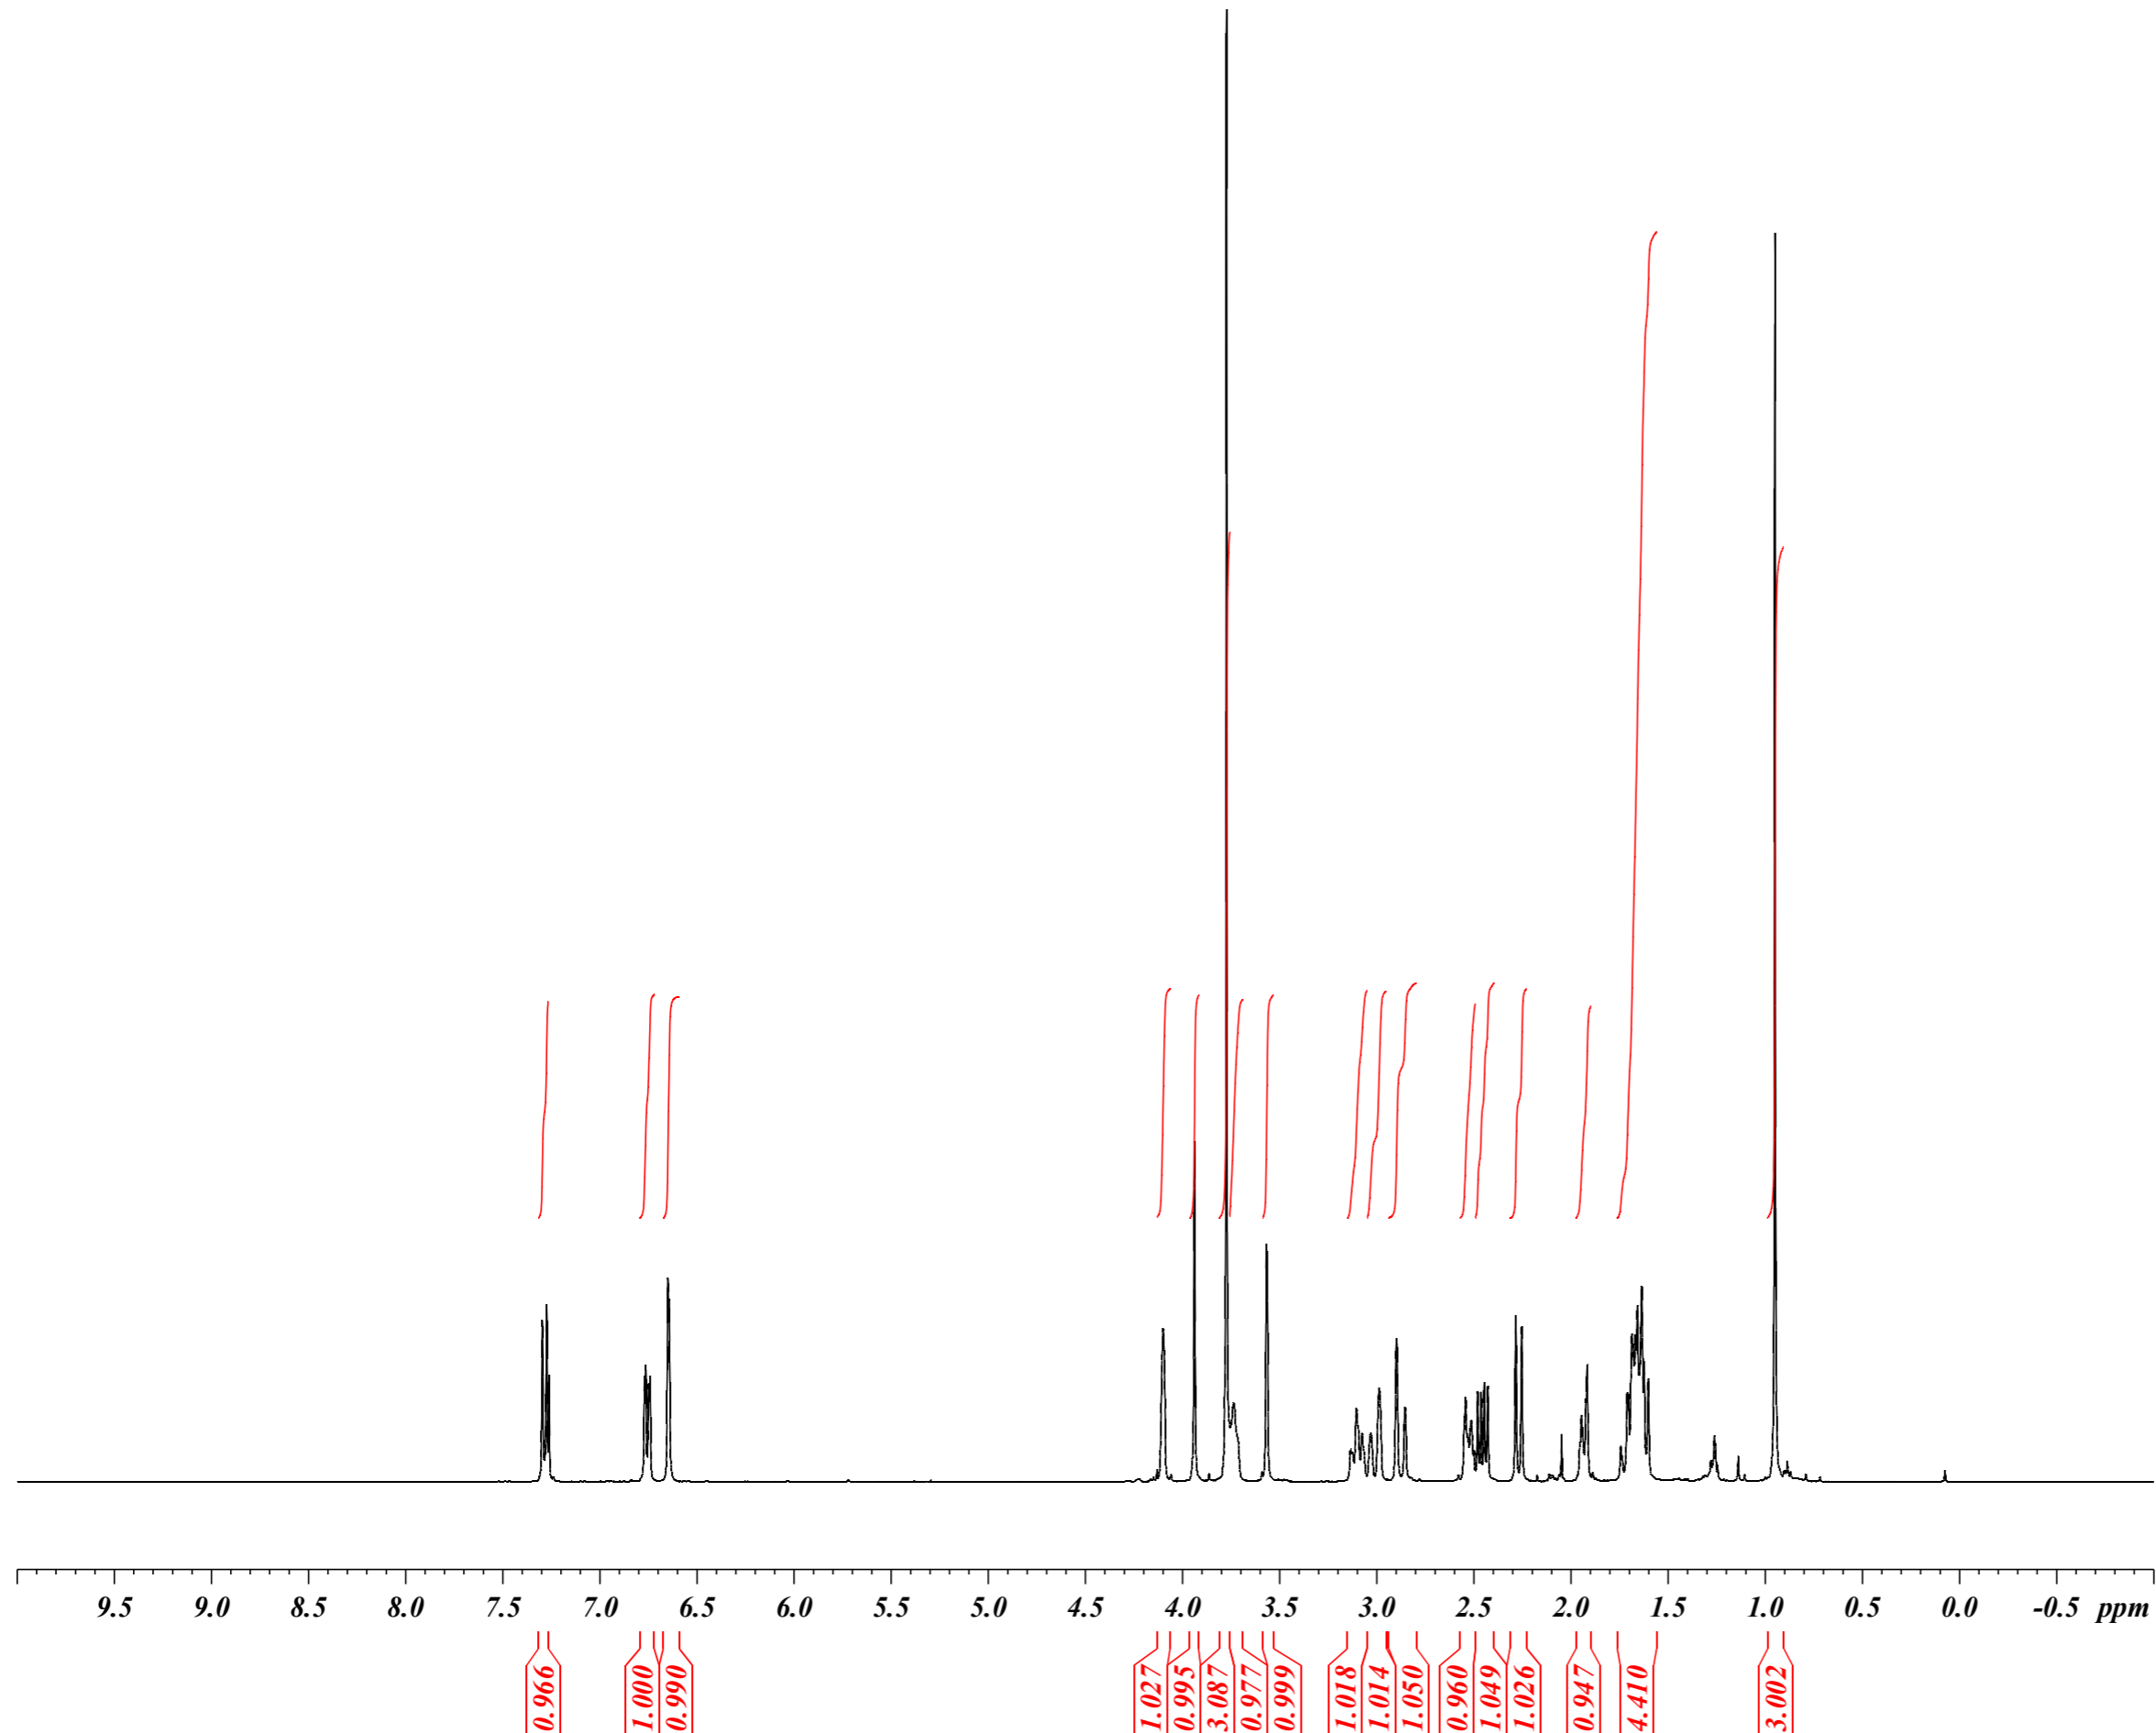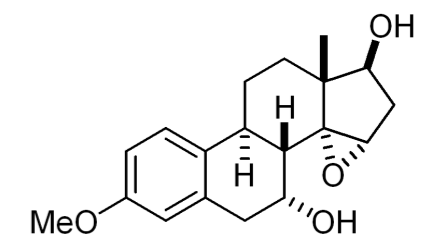

17a

<sup>1</sup>H NMR (400 MHz, CDCl<sub>3</sub>)

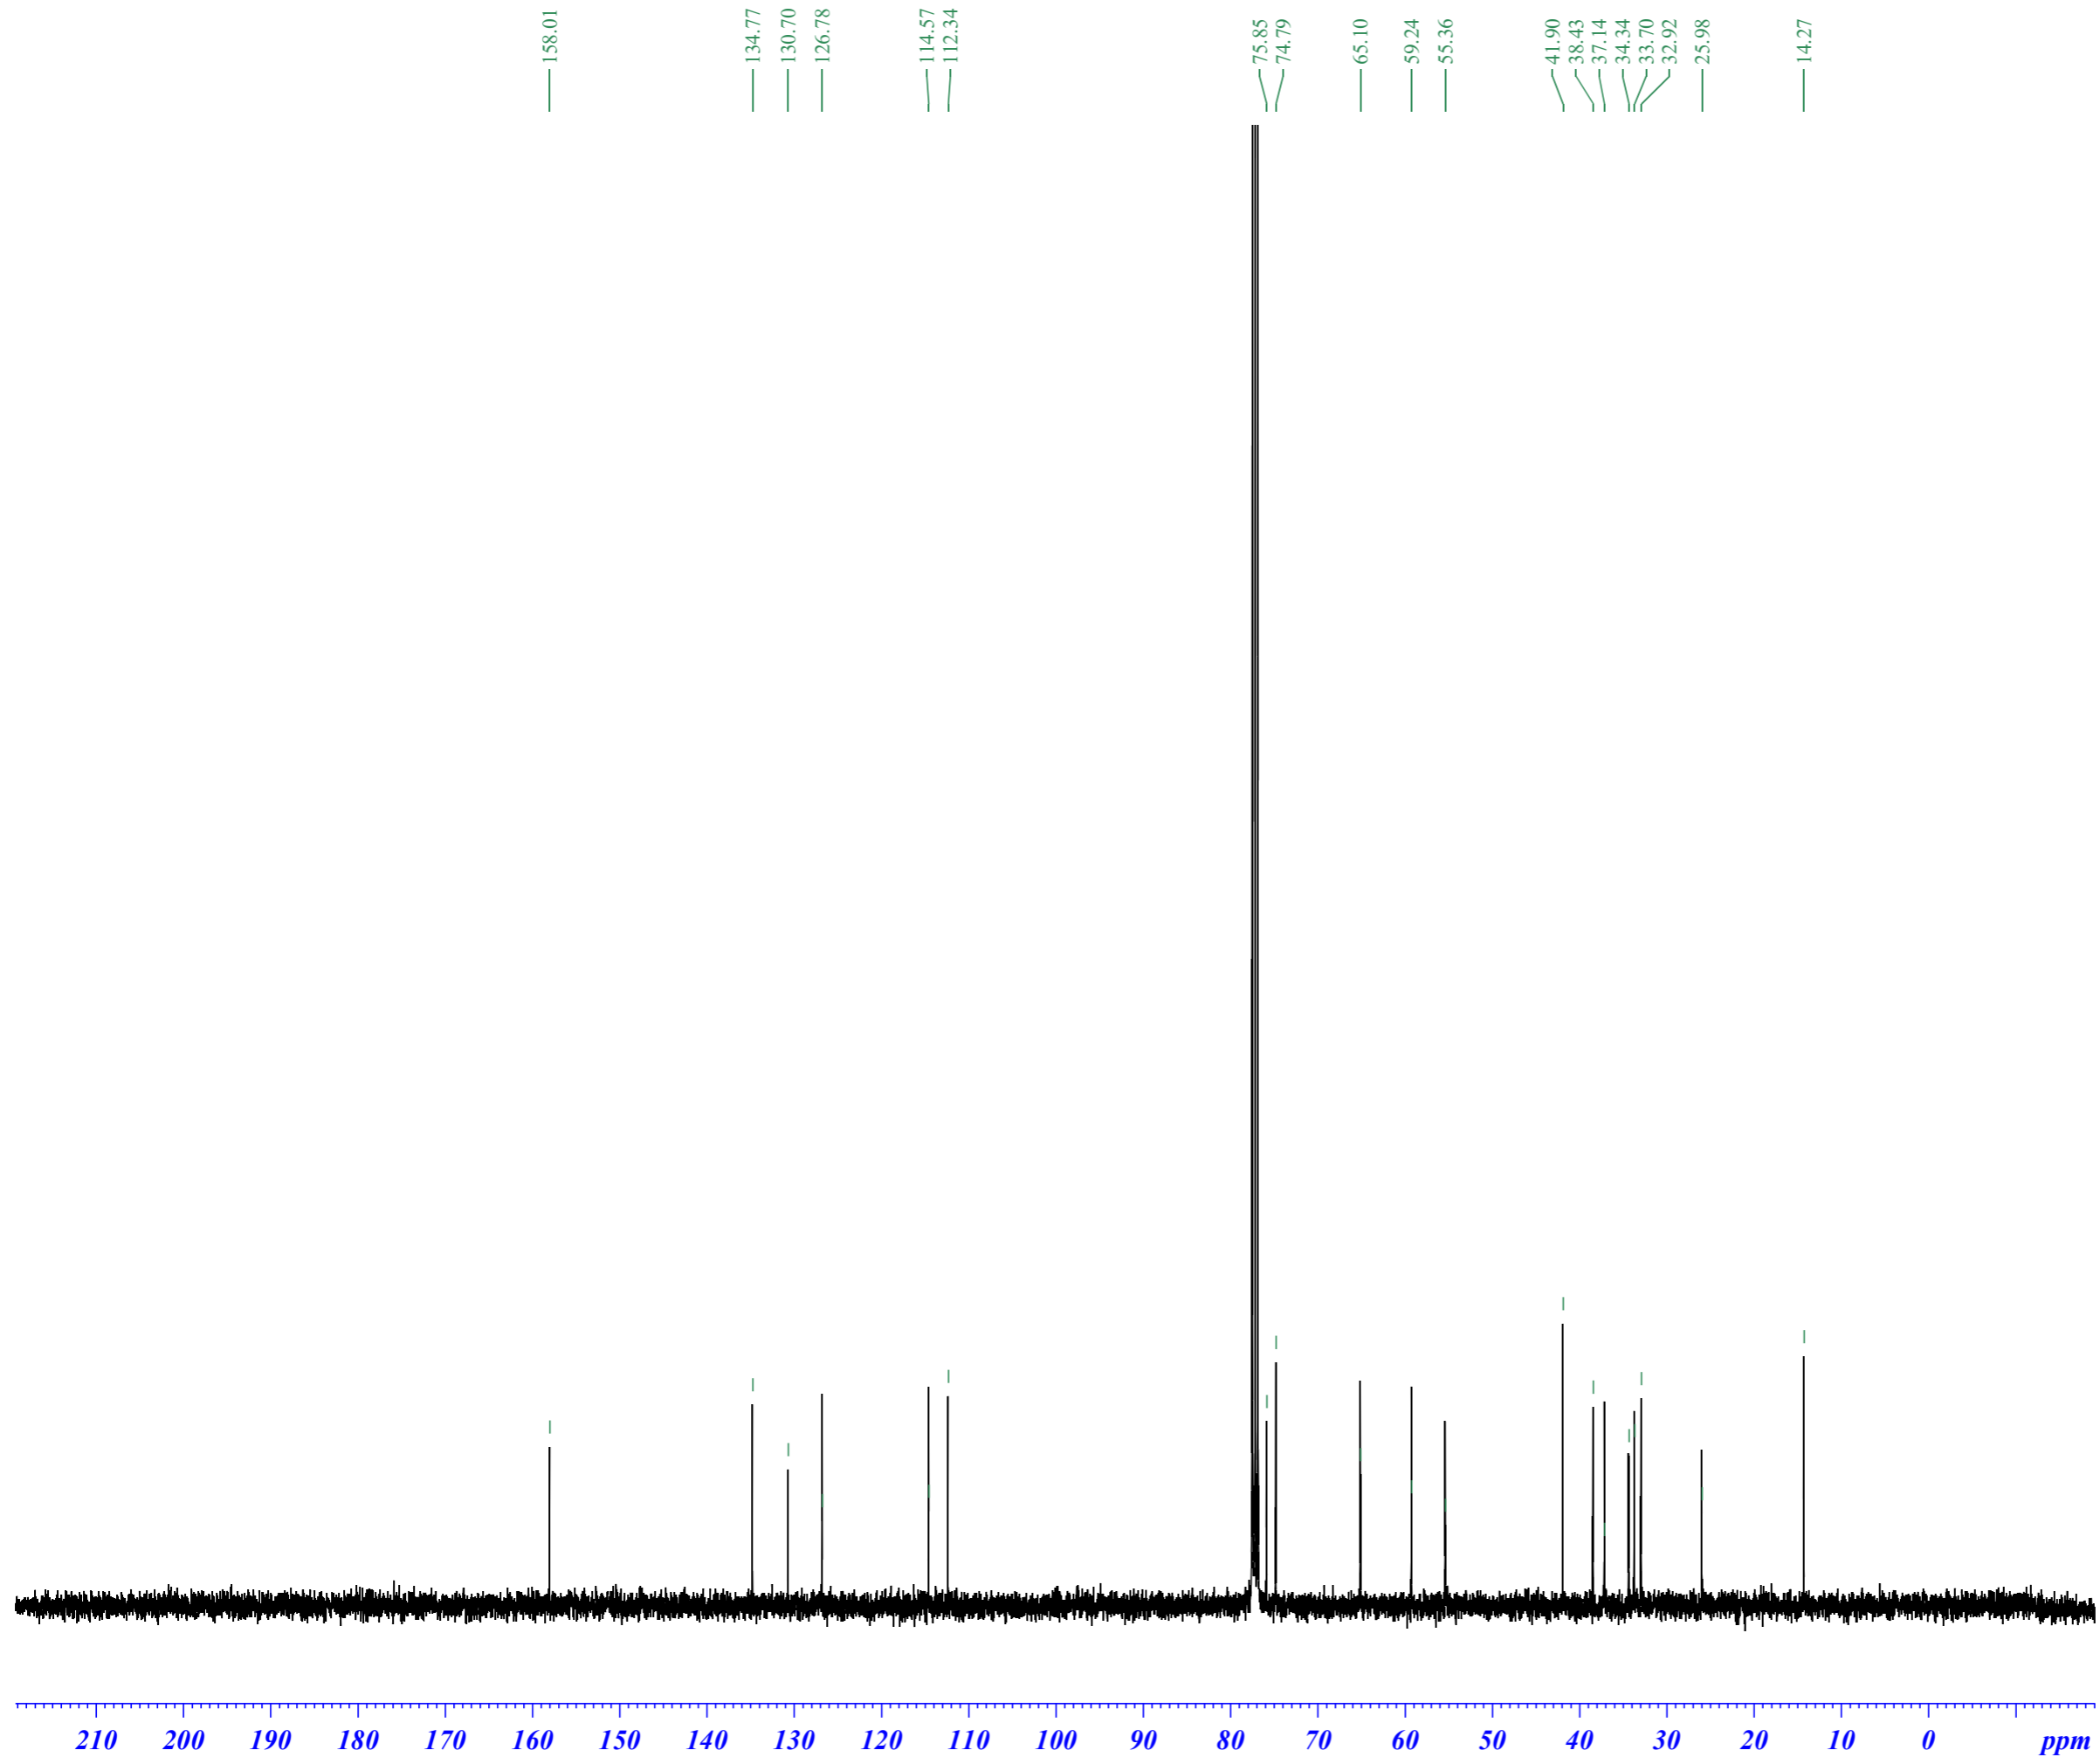

Current Data Parameters  
 NAME kawaiB400  
 EXPNO 384  
 PROCNO 1

F2 - Acquisition Parameters  
 Date\_ 20210119  
 Time\_ 16.05 h  
 INSTRUM spect  
 PROBHD 5 mm QNP 1H/13  
 PULPROG zgpg30  
 TD 65536  
 SOLVENT CDCl3  
 NS 1200  
 DS 4  
 SWH 23980.814 Hz  
 FIDRES 0.731836 Hz  
 AQ 1.3664256 sec  
 RG 1149.4  
 DW 20.850 usec  
 DE 6.50 usec  
 TE 296.1 K  
 D1 1.20000005 sec  
 d11 0.03000000 sec  
 DELTA 1.10000002 sec  
 TD0 1  
 SFO1 100.6228298 MHz  
 NUC1 13C  
 P1 12.00 usec  
 SFO2 400.1316005 MHz  
 NUC2 1H  
 CPDPRG[2] waltz16  
 PCPD2 90.00 usec

F2 - Processing parameters  
 SI 32768  
 SF 100.6127587 MHz  
 WDW EM  
 SSB 0  
 LB 1.00 Hz  
 GB 0  
 PC 1.40

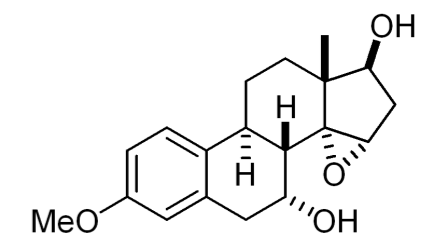

17a

<sup>13</sup>C NMR (100 MHz, CDCl<sub>3</sub>)

2150 21 01 19 TM

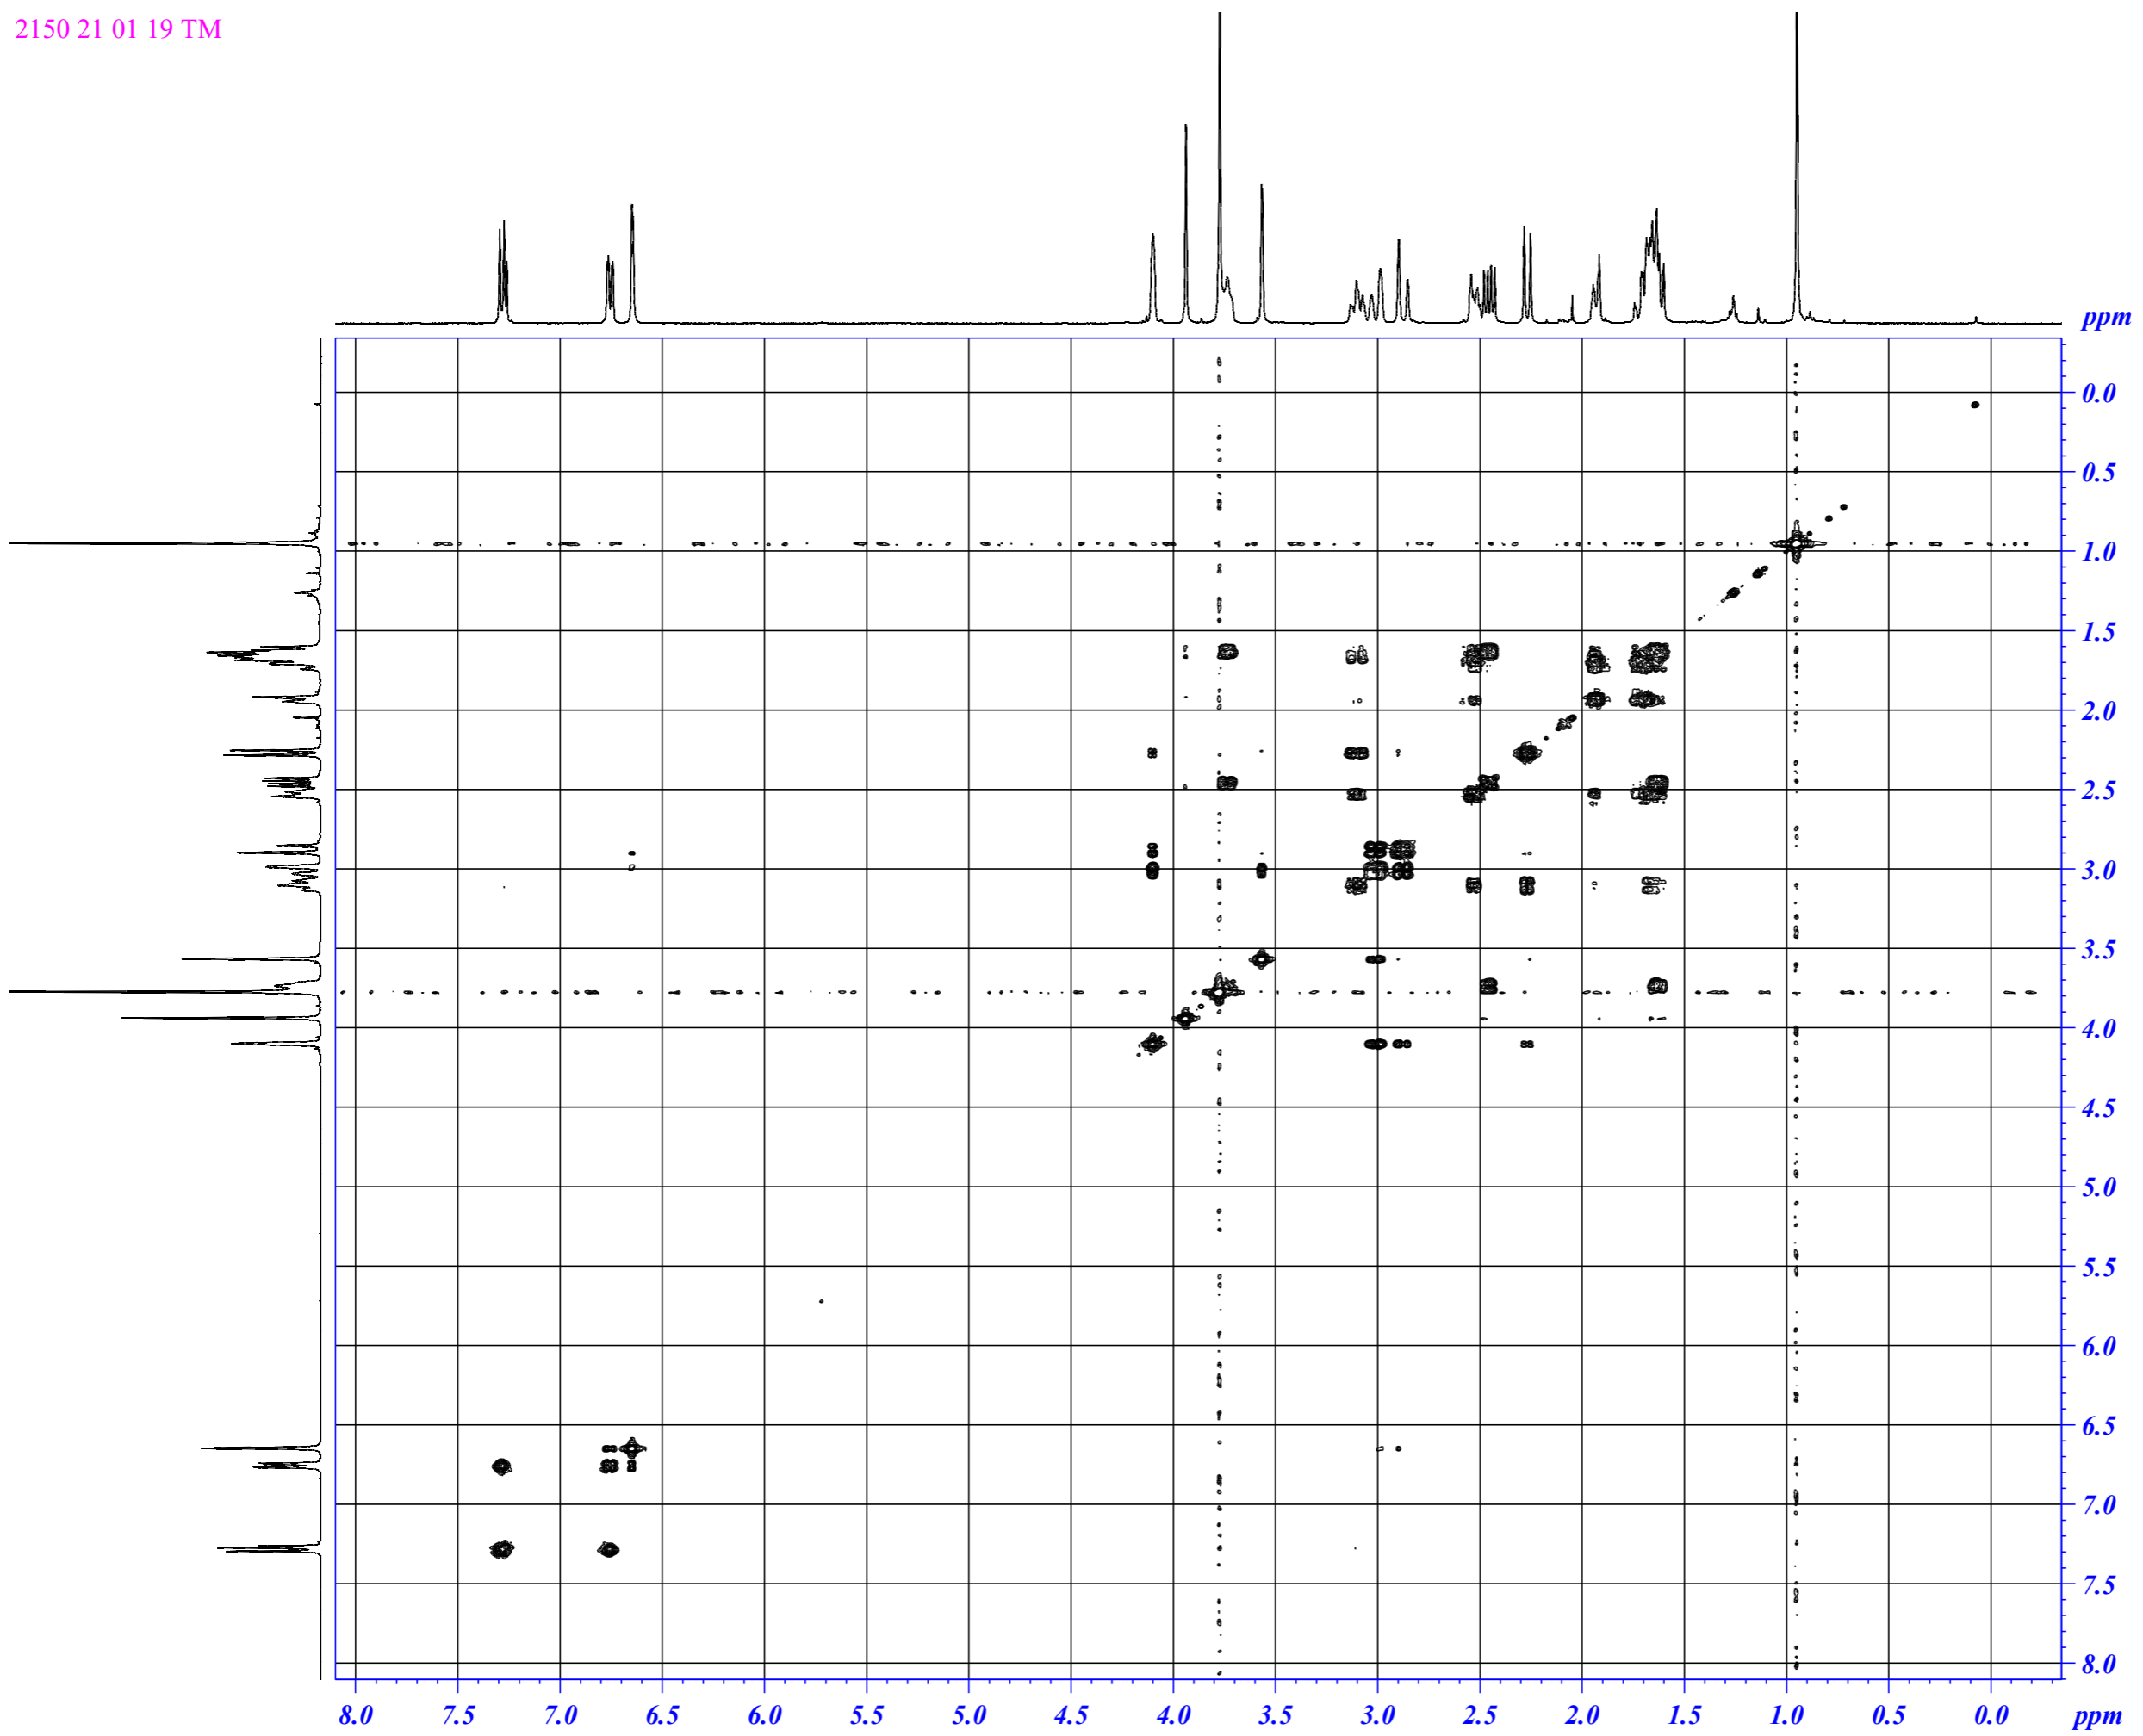

**Current Data Parameters**  
NAME kawaiB400  
EXPNO 383  
PROCNO 1

**F2 - Acquisition Parameters**  
Date\_ 20210119  
Time 14.56 h  
INSTRUM spect  
PROBHD 5 mm QNP 1H/13  
PULPROG cosygpgf  
TD 2048  
SOLVENT CDCl3  
NS 2  
DS 2  
SWH 3378.378 Hz  
FIDRES 3.299198 Hz  
AQ 0.3031040 sec  
RG 181  
DW 148.000 usec  
DE 6.50 usec  
TE 295.6 K  
d0 0.00000300 sec  
d1 1.48689198 sec  
d13 0.0000400 sec  
d16 0.00010000 sec  
in0 0 sec  
SFO1 400.1315591 MHz  
NUC1 1H  
P0 15.00 usec  
P1 15.00 usec  
GPNAM[1] SINE\_100  
GPZ1 10.00 %  
P16 1000.00 usec

**F1 - Acquisition parameters**  
TD 256  
SFO1 400.1316 MHz  
FIDRES 26.393564 Hz  
SW 8.443 ppm  
FnMODE QF

**F2 - Processing parameters**  
SI 1024  
SF 400.1300080 MHz  
WDW SINE  
SSB 0  
LB 0 Hz  
GB 0  
PC 1.40

**F1 - Processing parameters**  
SI 1024  
MC2 QF  
SF 400.1300066 MHz  
WDW SINE  
SSB 0  
LB 0 Hz  
GB 0

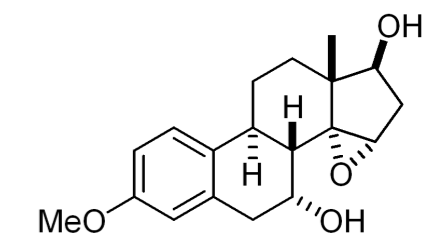

**17a**  
COSY (CDCl<sub>3</sub>)



**Current Data Parameters**  
NAME kawaiB400-2  
EXPNO 21  
PROCNO 1

**F2 - Acquisition Parameters**  
Date\_ 20210304  
Time\_ 13.12 h  
INSTRUM spect  
PROBHD 5 mm QNP 1H/13  
PULPROG zg30  
TD 65536  
SOLVENT CDCl3  
NS 16  
DS 2  
SWH 8278.146 Hz  
FIDRES 0.252629 Hz  
AQ 3.9583745 sec  
RG 812.7  
DW 60.400 usec  
DE 6.50 usec  
TE 296.5 K  
D1 1.0000000 sec  
TD0 1  
SFO1 400.1324710 MHz  
NUC1 1H  
P1 15.00 usec

**F2 - Processing parameters**  
SI 32768  
SF 400.1300096 MHz  
WDW EM  
SSB 0  
LB 0.30 Hz  
GB 0  
PC 1.00

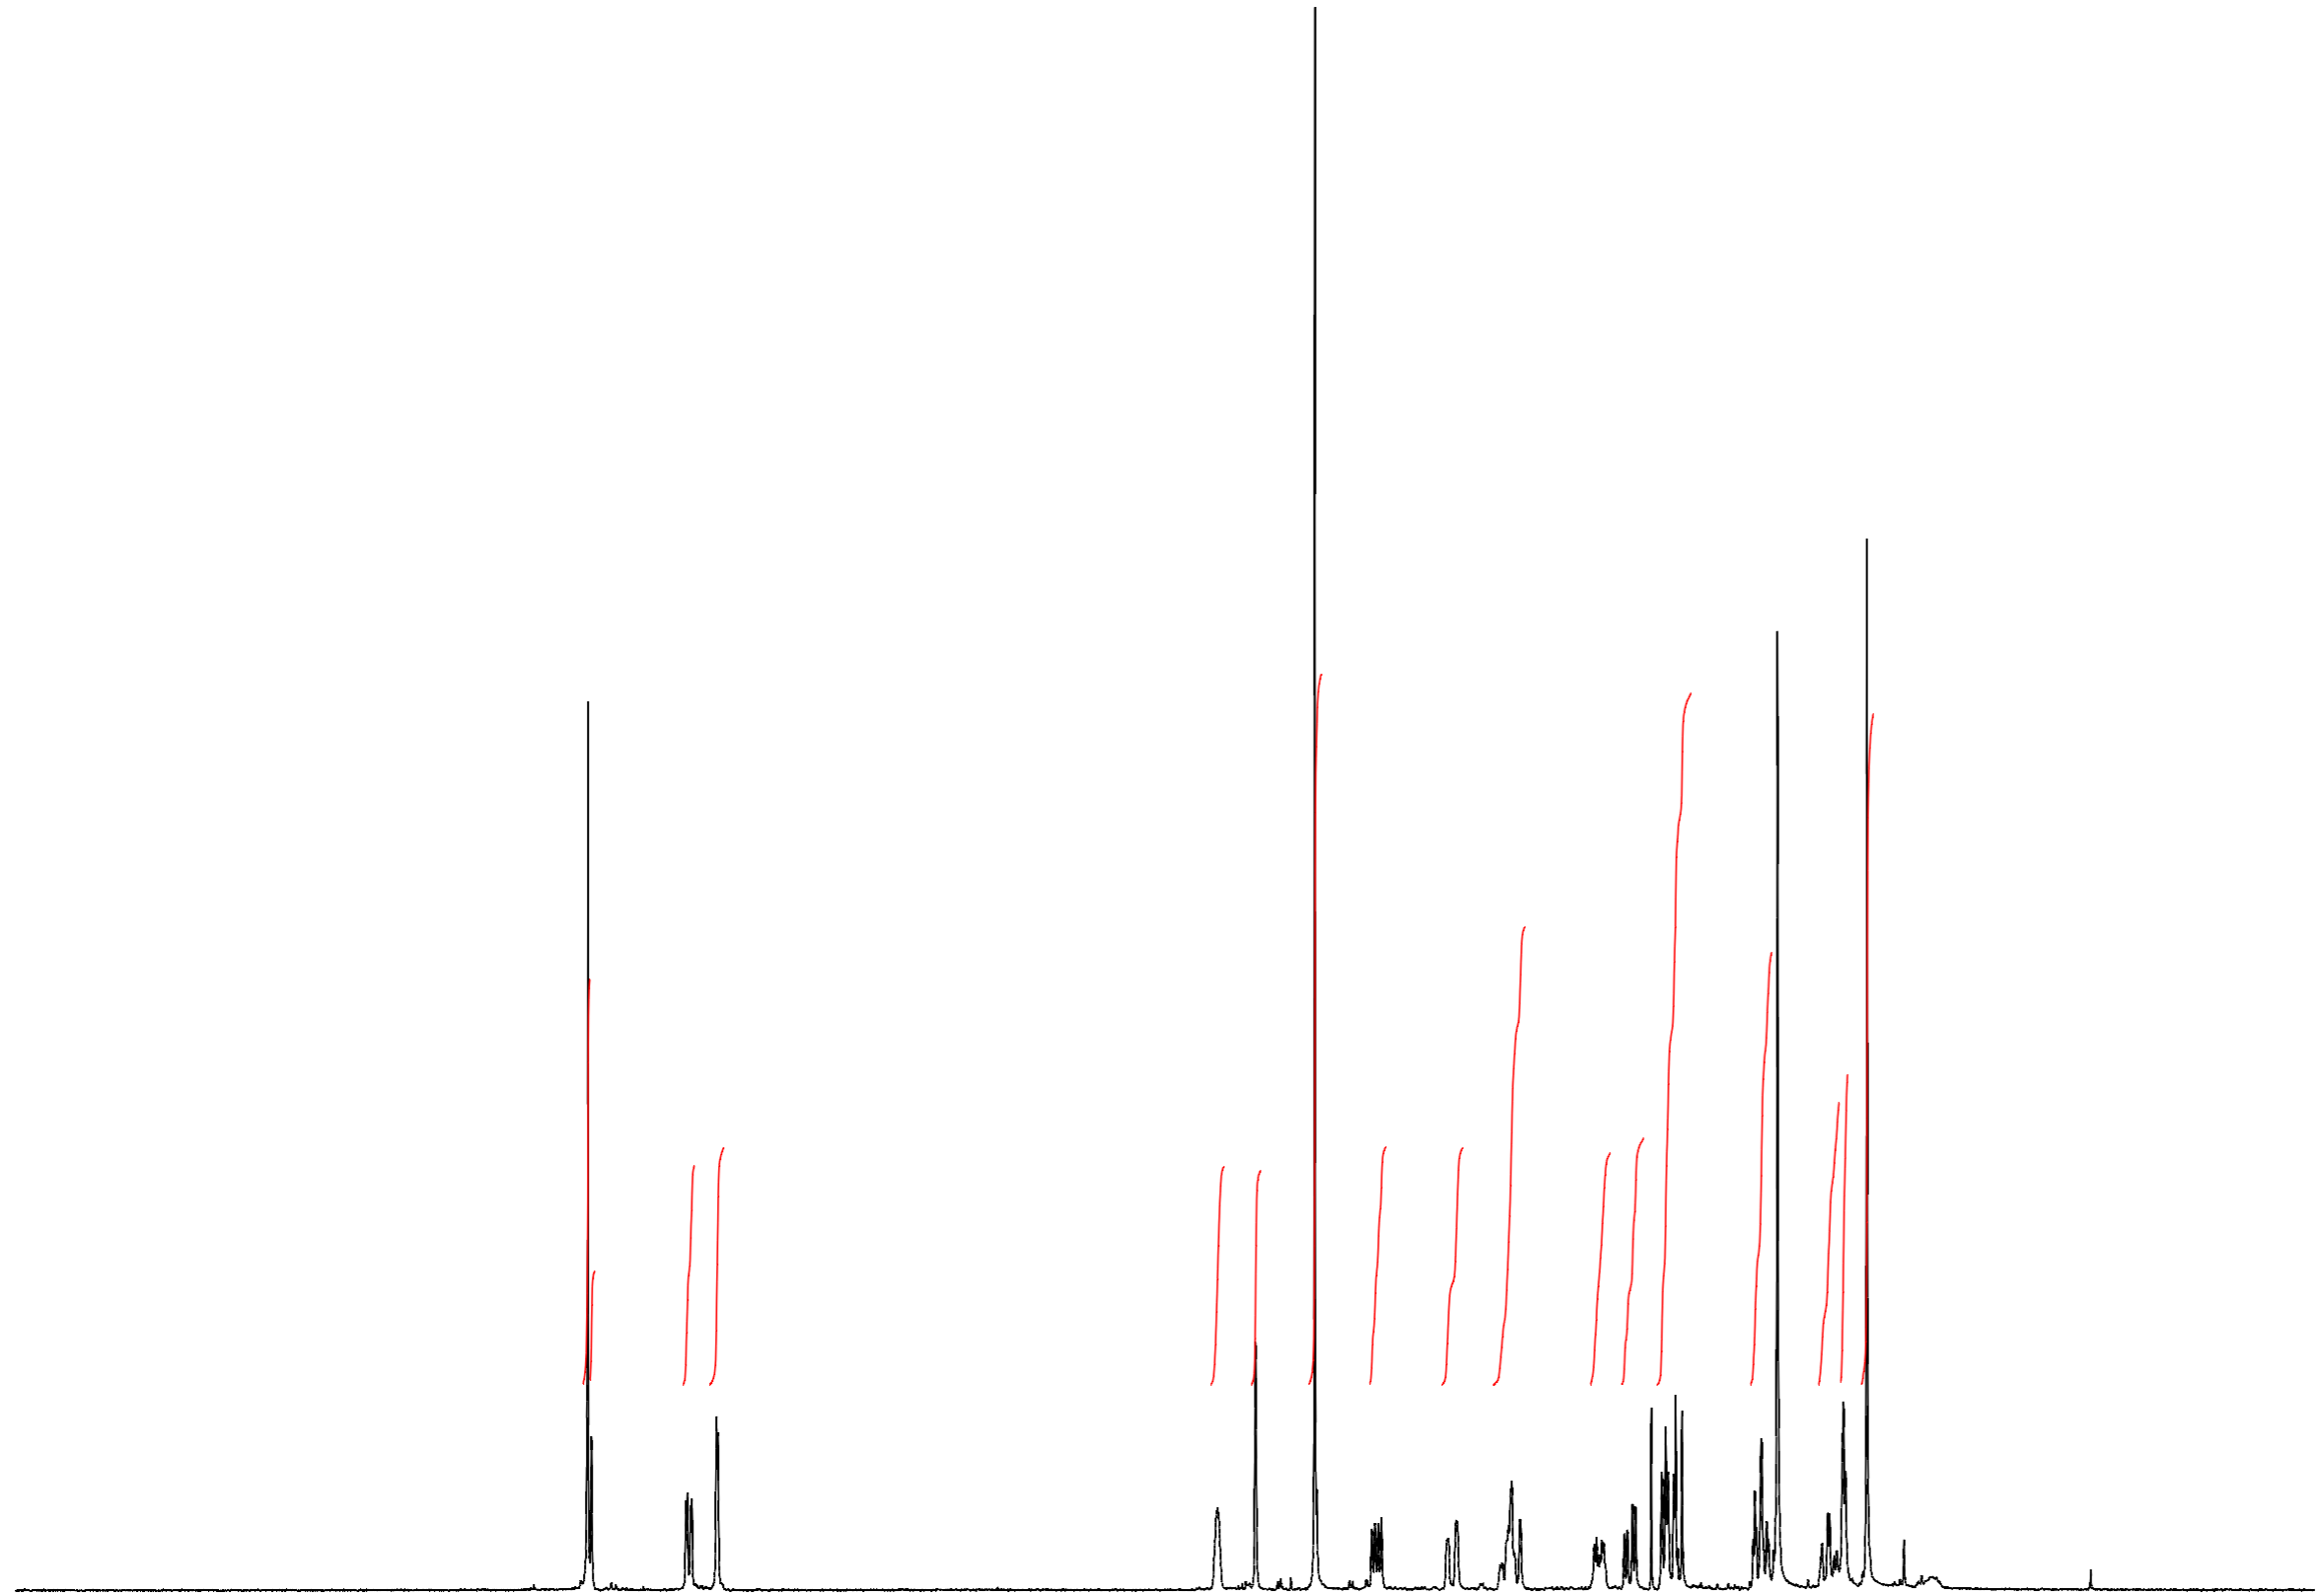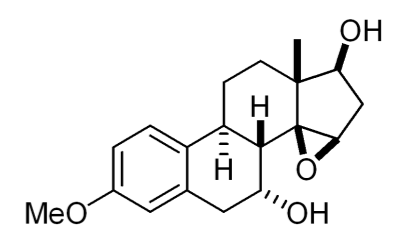

**17b**  
<sup>1</sup>H NMR (400 MHz, CDCl<sub>3</sub>)

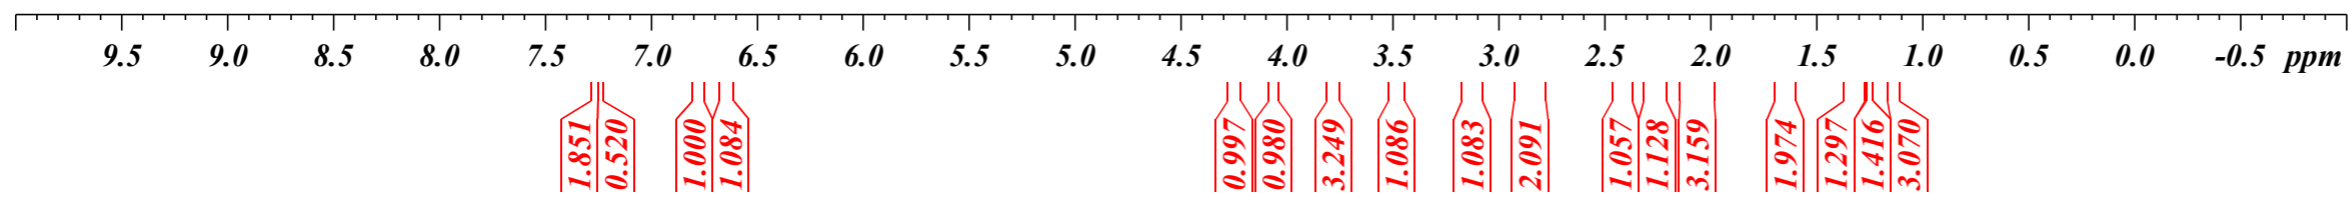

[2150] bp

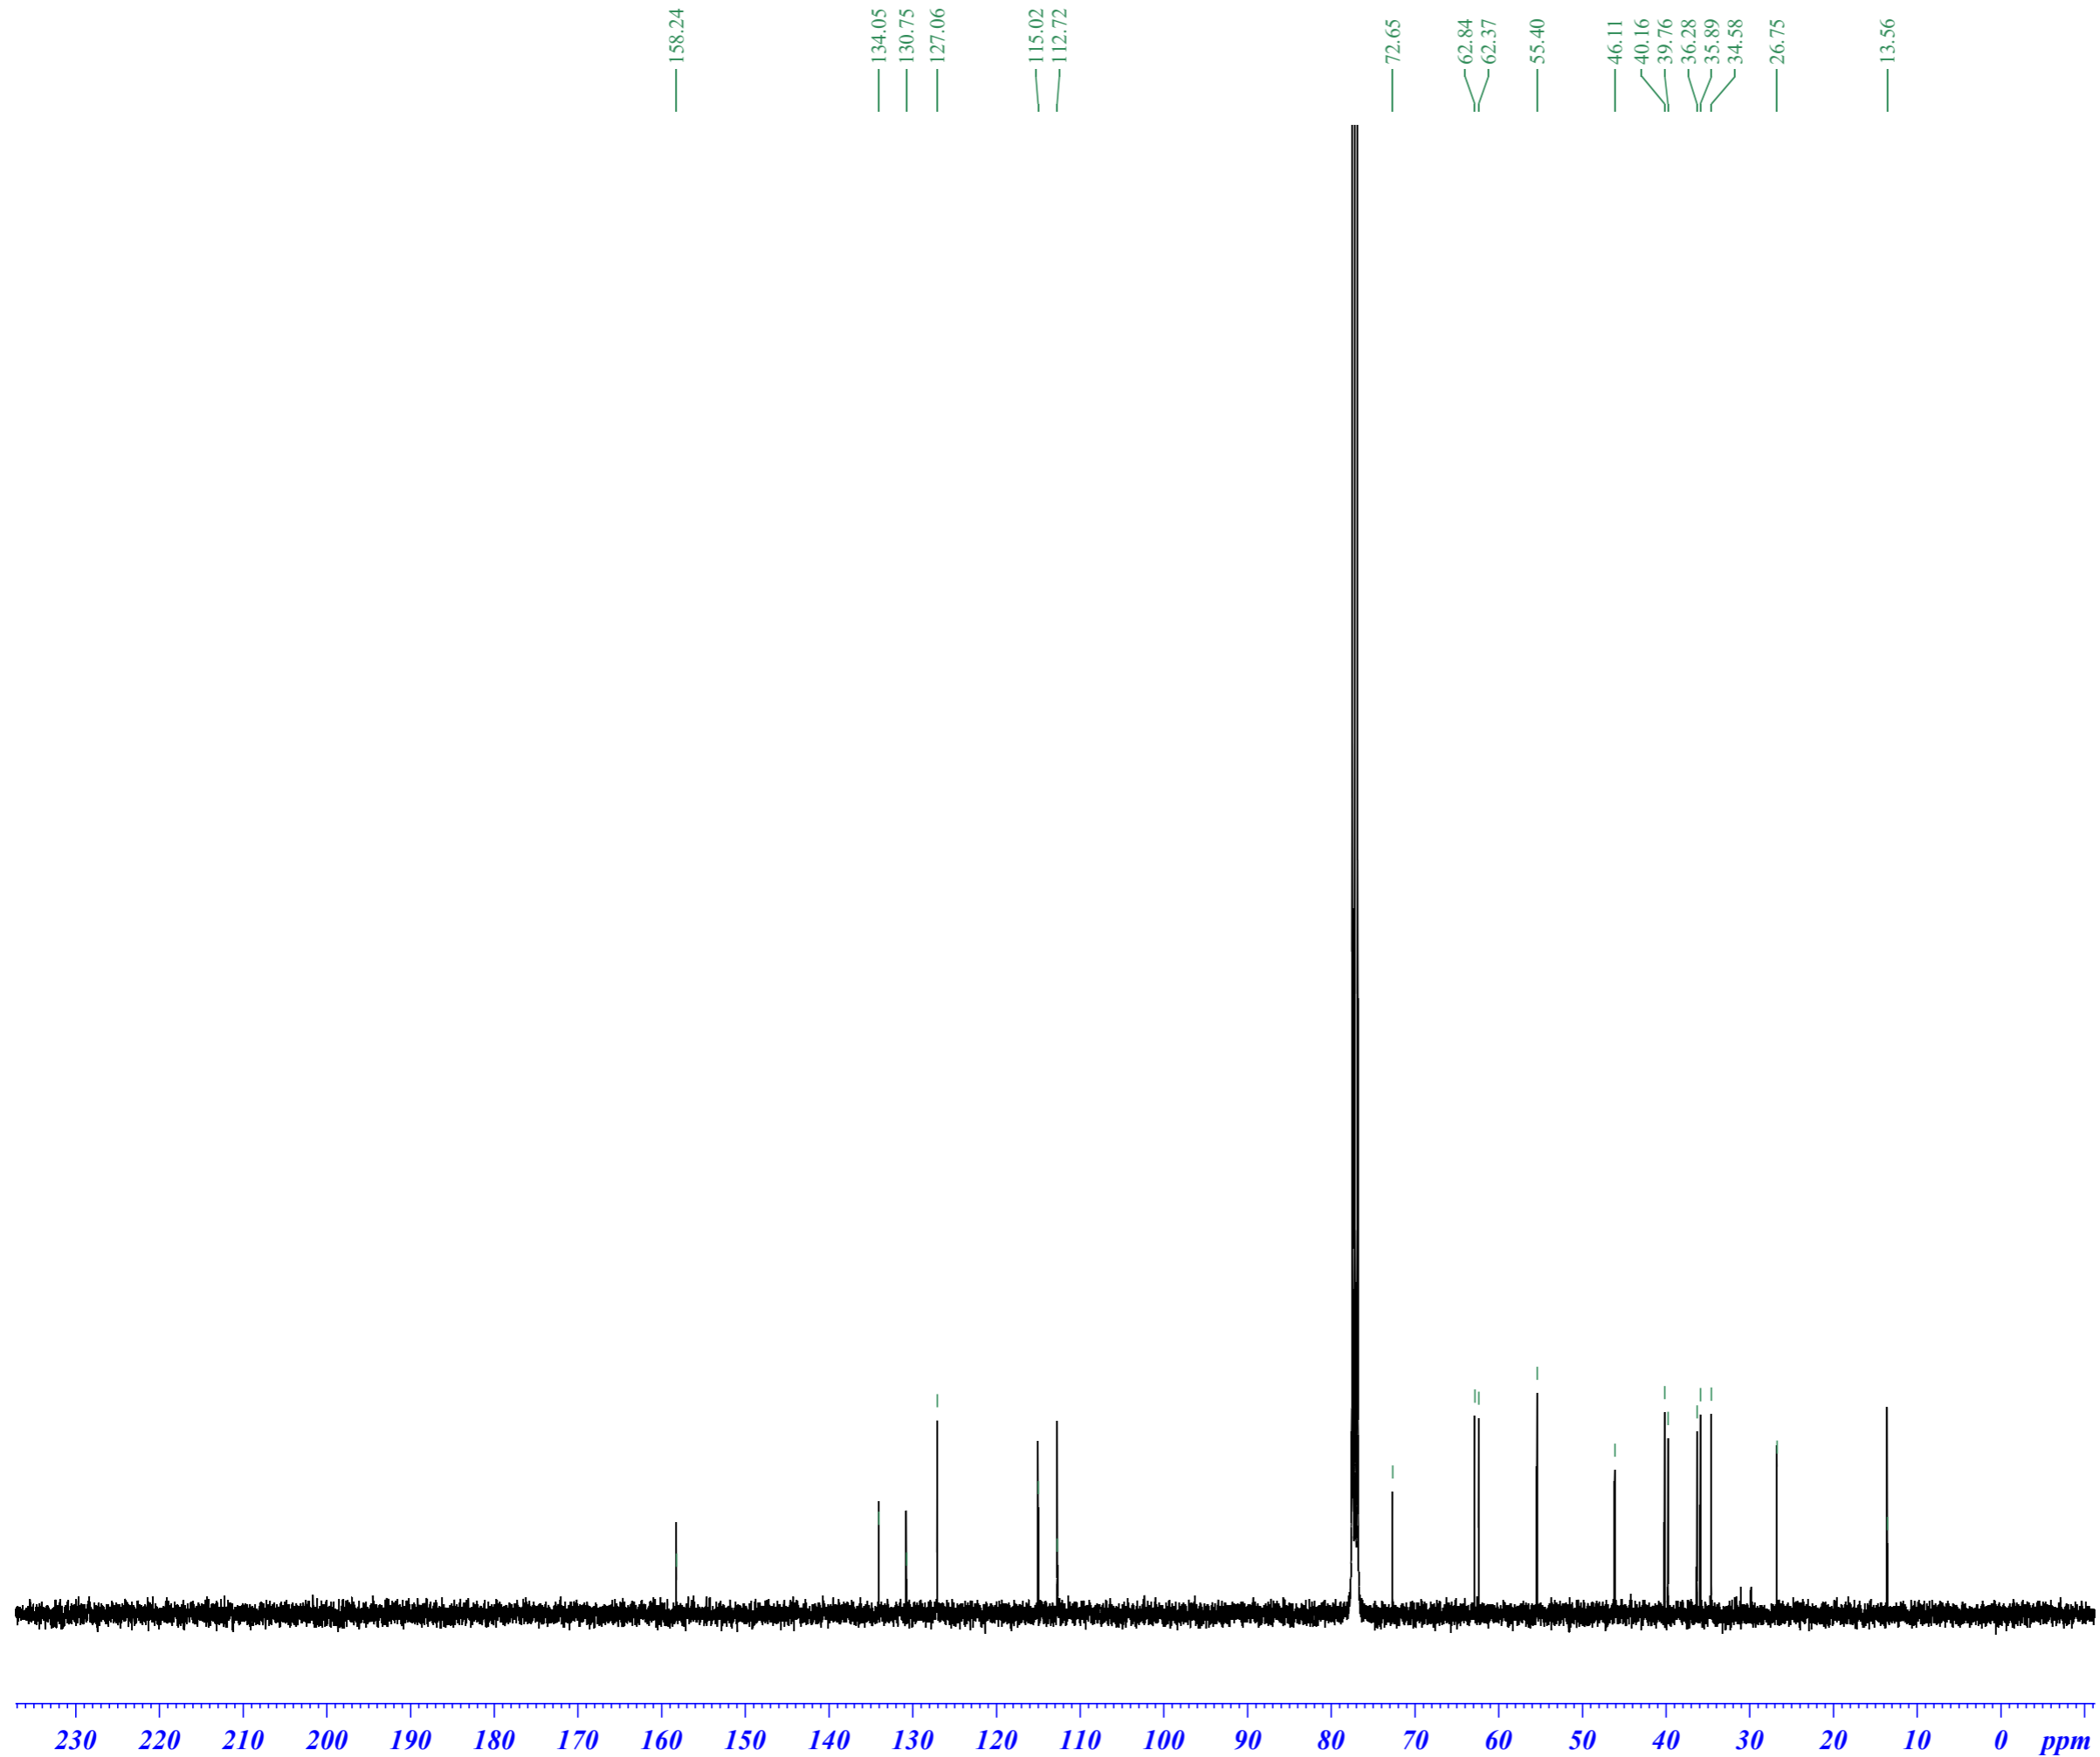

Current Data Parameters  
NAME kawai 400AN  
EXPNO 15  
PROCNO 1

F2 - Acquisition Parameters  
Date\_ 20210312  
Time\_ 17.13 h  
INSTRUM Avance  
PROBHD Z163739\_0304 (  
PULPROG zgpg30  
TD 65536  
SOLVENT CDCl3  
NS 3200  
DS 2  
SWH 25000.000 Hz  
FIDRES 0.762939 Hz  
AQ 1.3107200 sec  
RG 101  
DW 20.000 usec  
DE 8.64 usec  
TE 300.0 K  
D1 1.50000000 sec  
D11 0.03000000 sec  
TD0 1  
SFO1 100.6241209 MHz  
NUC1 13C  
P0 2.67 usec  
P1 8.00 usec  
PLW1 92.79299927 W  
SFO2 400.1326008 MHz  
NUC2 1H  
CPDPRG[2] waltz16  
PCPD2 90.00 usec  
PLW2 22.60000038 W  
PLW12 0.17857000 W  
PLW13 0.08981800 W

F2 - Processing parameters  
SI 65536  
SF 100.6127540 MHz  
WDW EM  
SSB 0  
LB 1.00 Hz  
GB 0  
PC 1.40

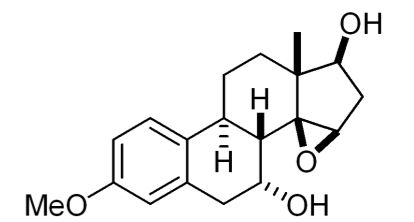

17b

<sup>13</sup>C NMR (100 MHz, CDCl<sub>3</sub>)

**Current Data Parameters**  
 NAME kawaiB400  
 EXPNO 346  
 PROCNO 1

**F2 - Acquisition Parameters**  
 Date\_ 20201228  
 Time\_ 12.18  
 INSTRUM spect  
 PROBHD 5 mm QNP 1H/13  
 PULPROG zg30  
 TD 65536  
 SOLVENT MeOD  
 NS 24  
 DS 2  
 SWH 8278.146 Hz  
 FIDRES 0.126314 Hz  
 AQ 3.9583745 sec  
 RG 2048  
 DW 60.400 usec  
 DE 6.50 usec  
 TE 295.2 K  
 D1 1.0000000 sec  
 TD0 1

=====**CHANNEL f1**=====

NUC1 1H  
 P1 15.00 usec  
 PL1 10.30 dB  
 SFO1 400.1324710 MHz

**F2 - Processing parameters**  
 SI 32768  
 SF 400.1300074 MHz  
 WDW EM  
 SSB 0  
 LB 0.30 Hz  
 GB 0  
 PC 1.00

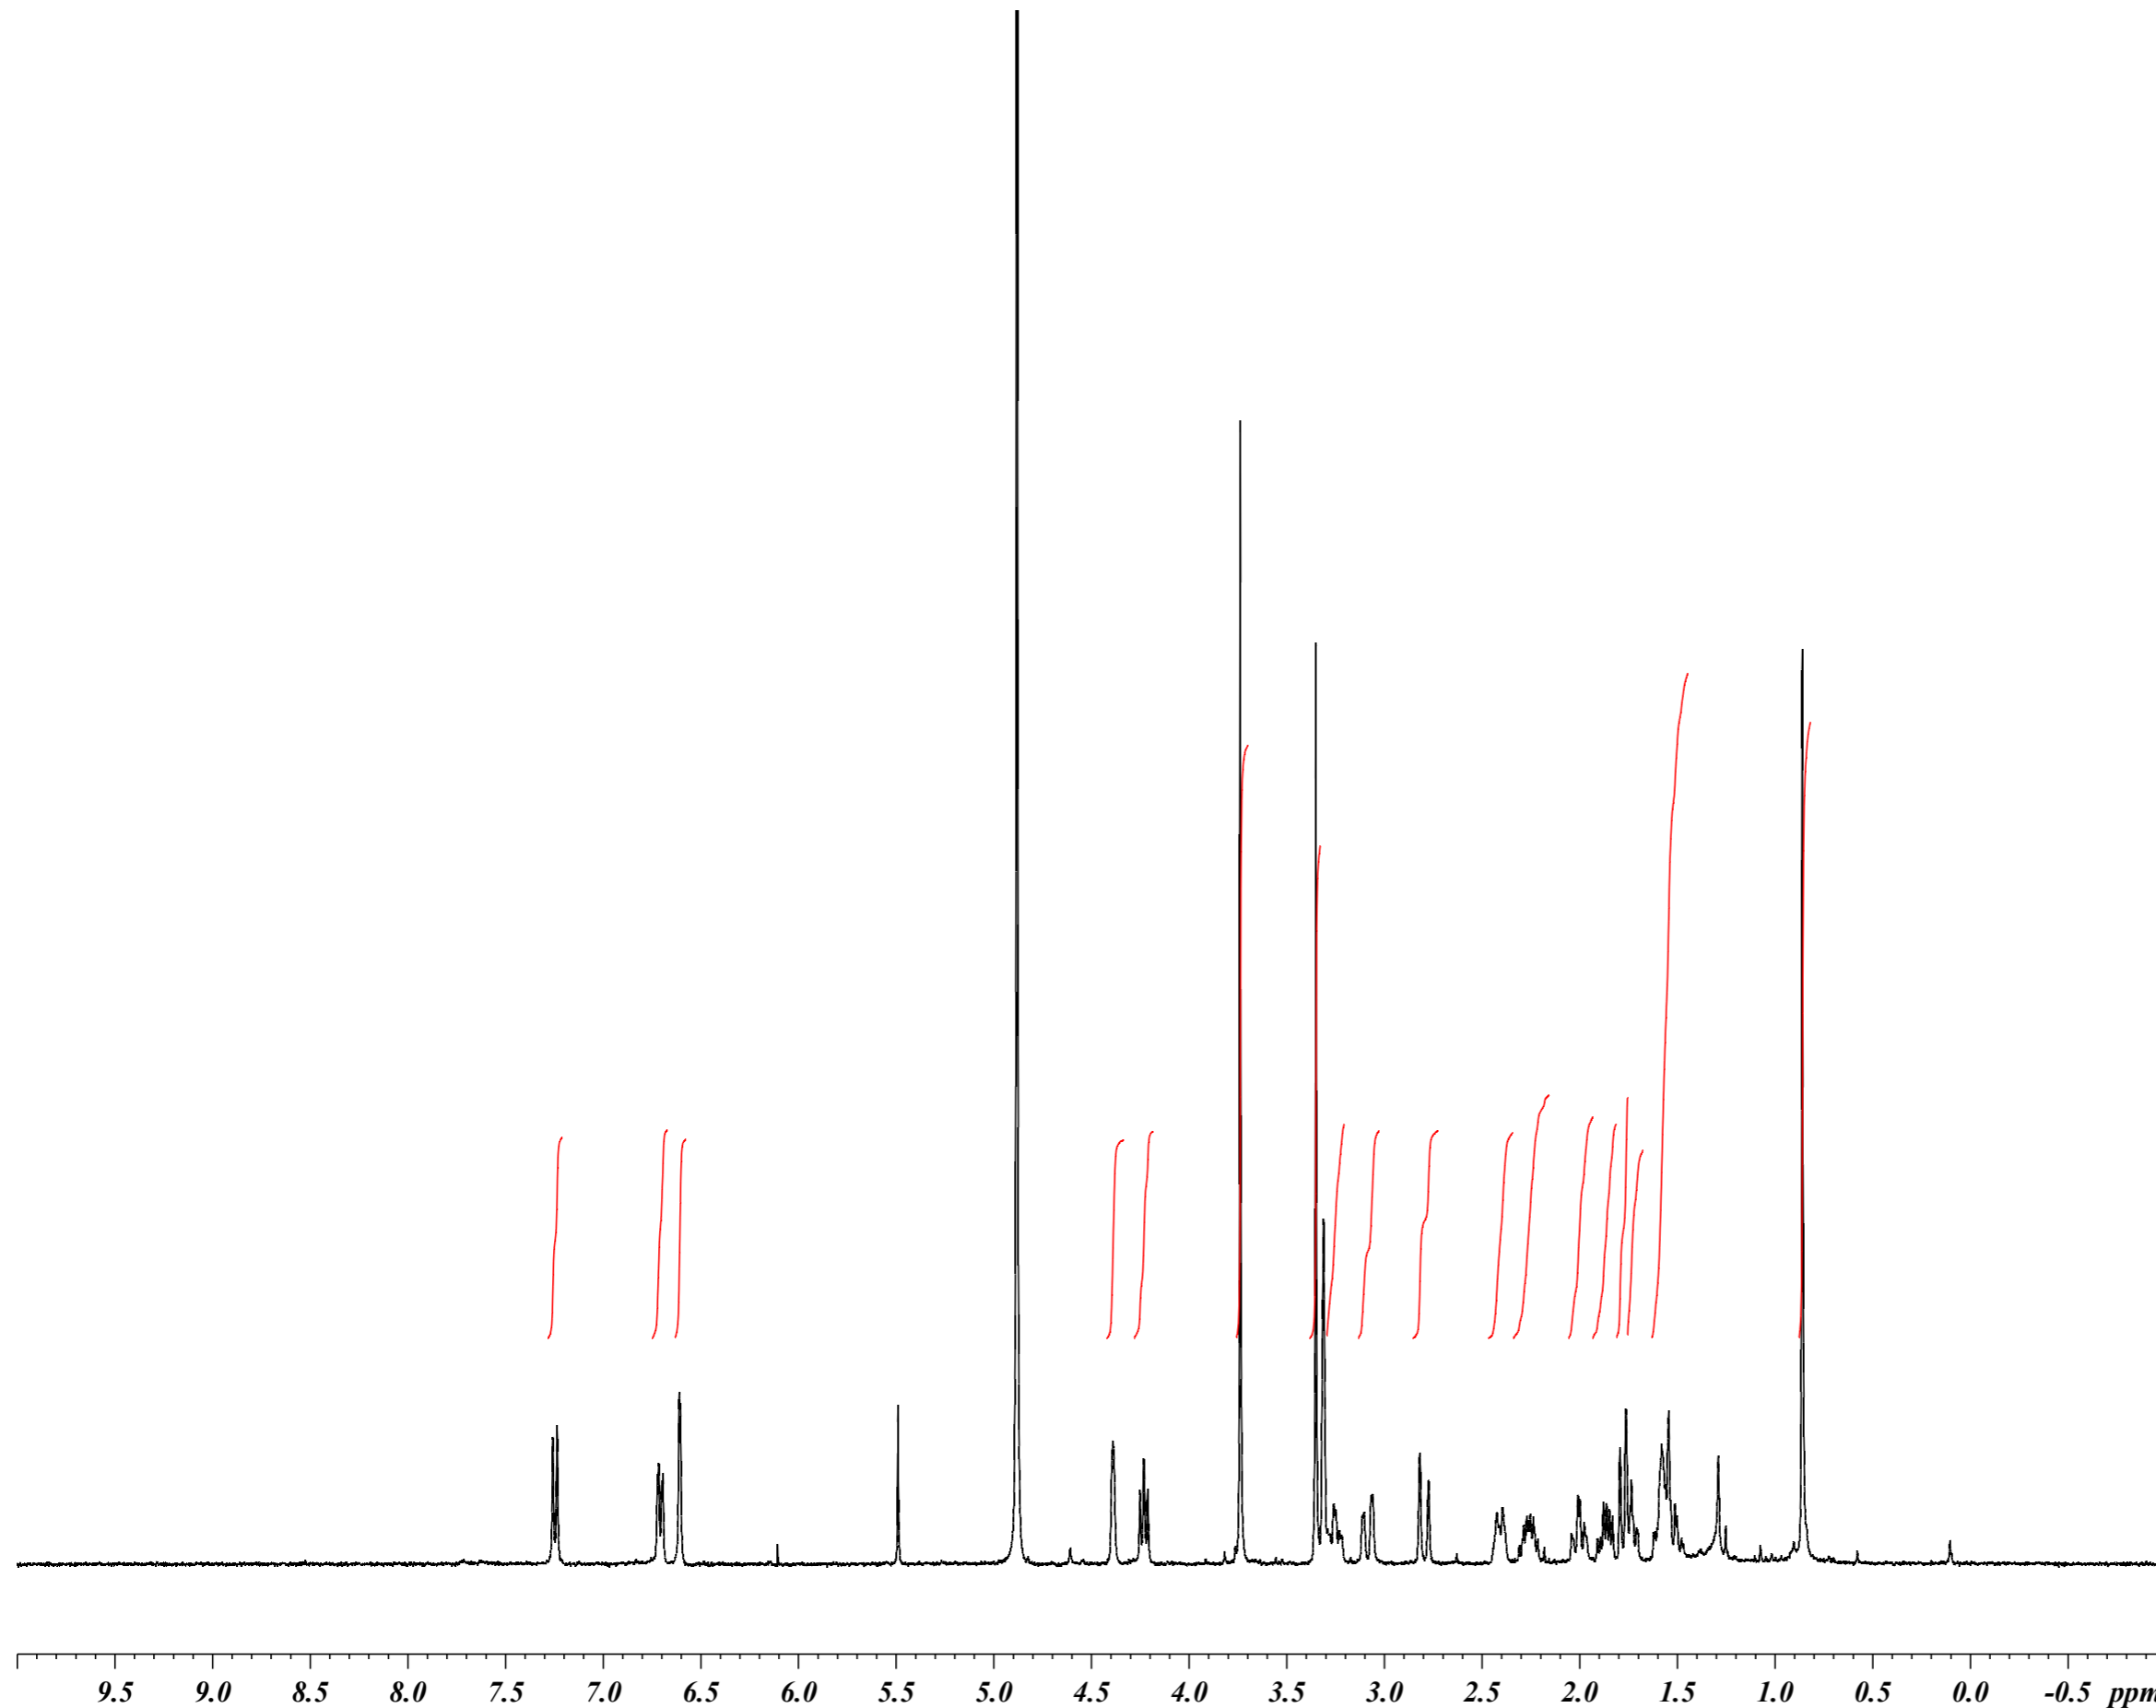

1.000  
 1.037  
 0.988  
 0.984  
 1.030  
 2.950  
 2.449  
 1.064  
 1.033  
 1.032  
 1.023  
 1.210  
 1.102  
 1.067  
 1.216  
 0.936  
 3.308  
 3.065

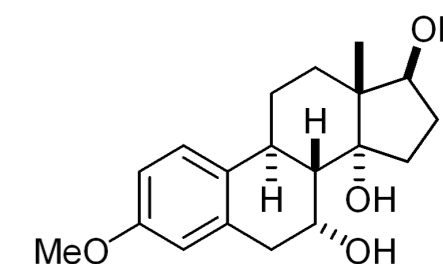

**1b**

<sup>1</sup>H NMR (400 MHz, CD<sub>3</sub>OD)

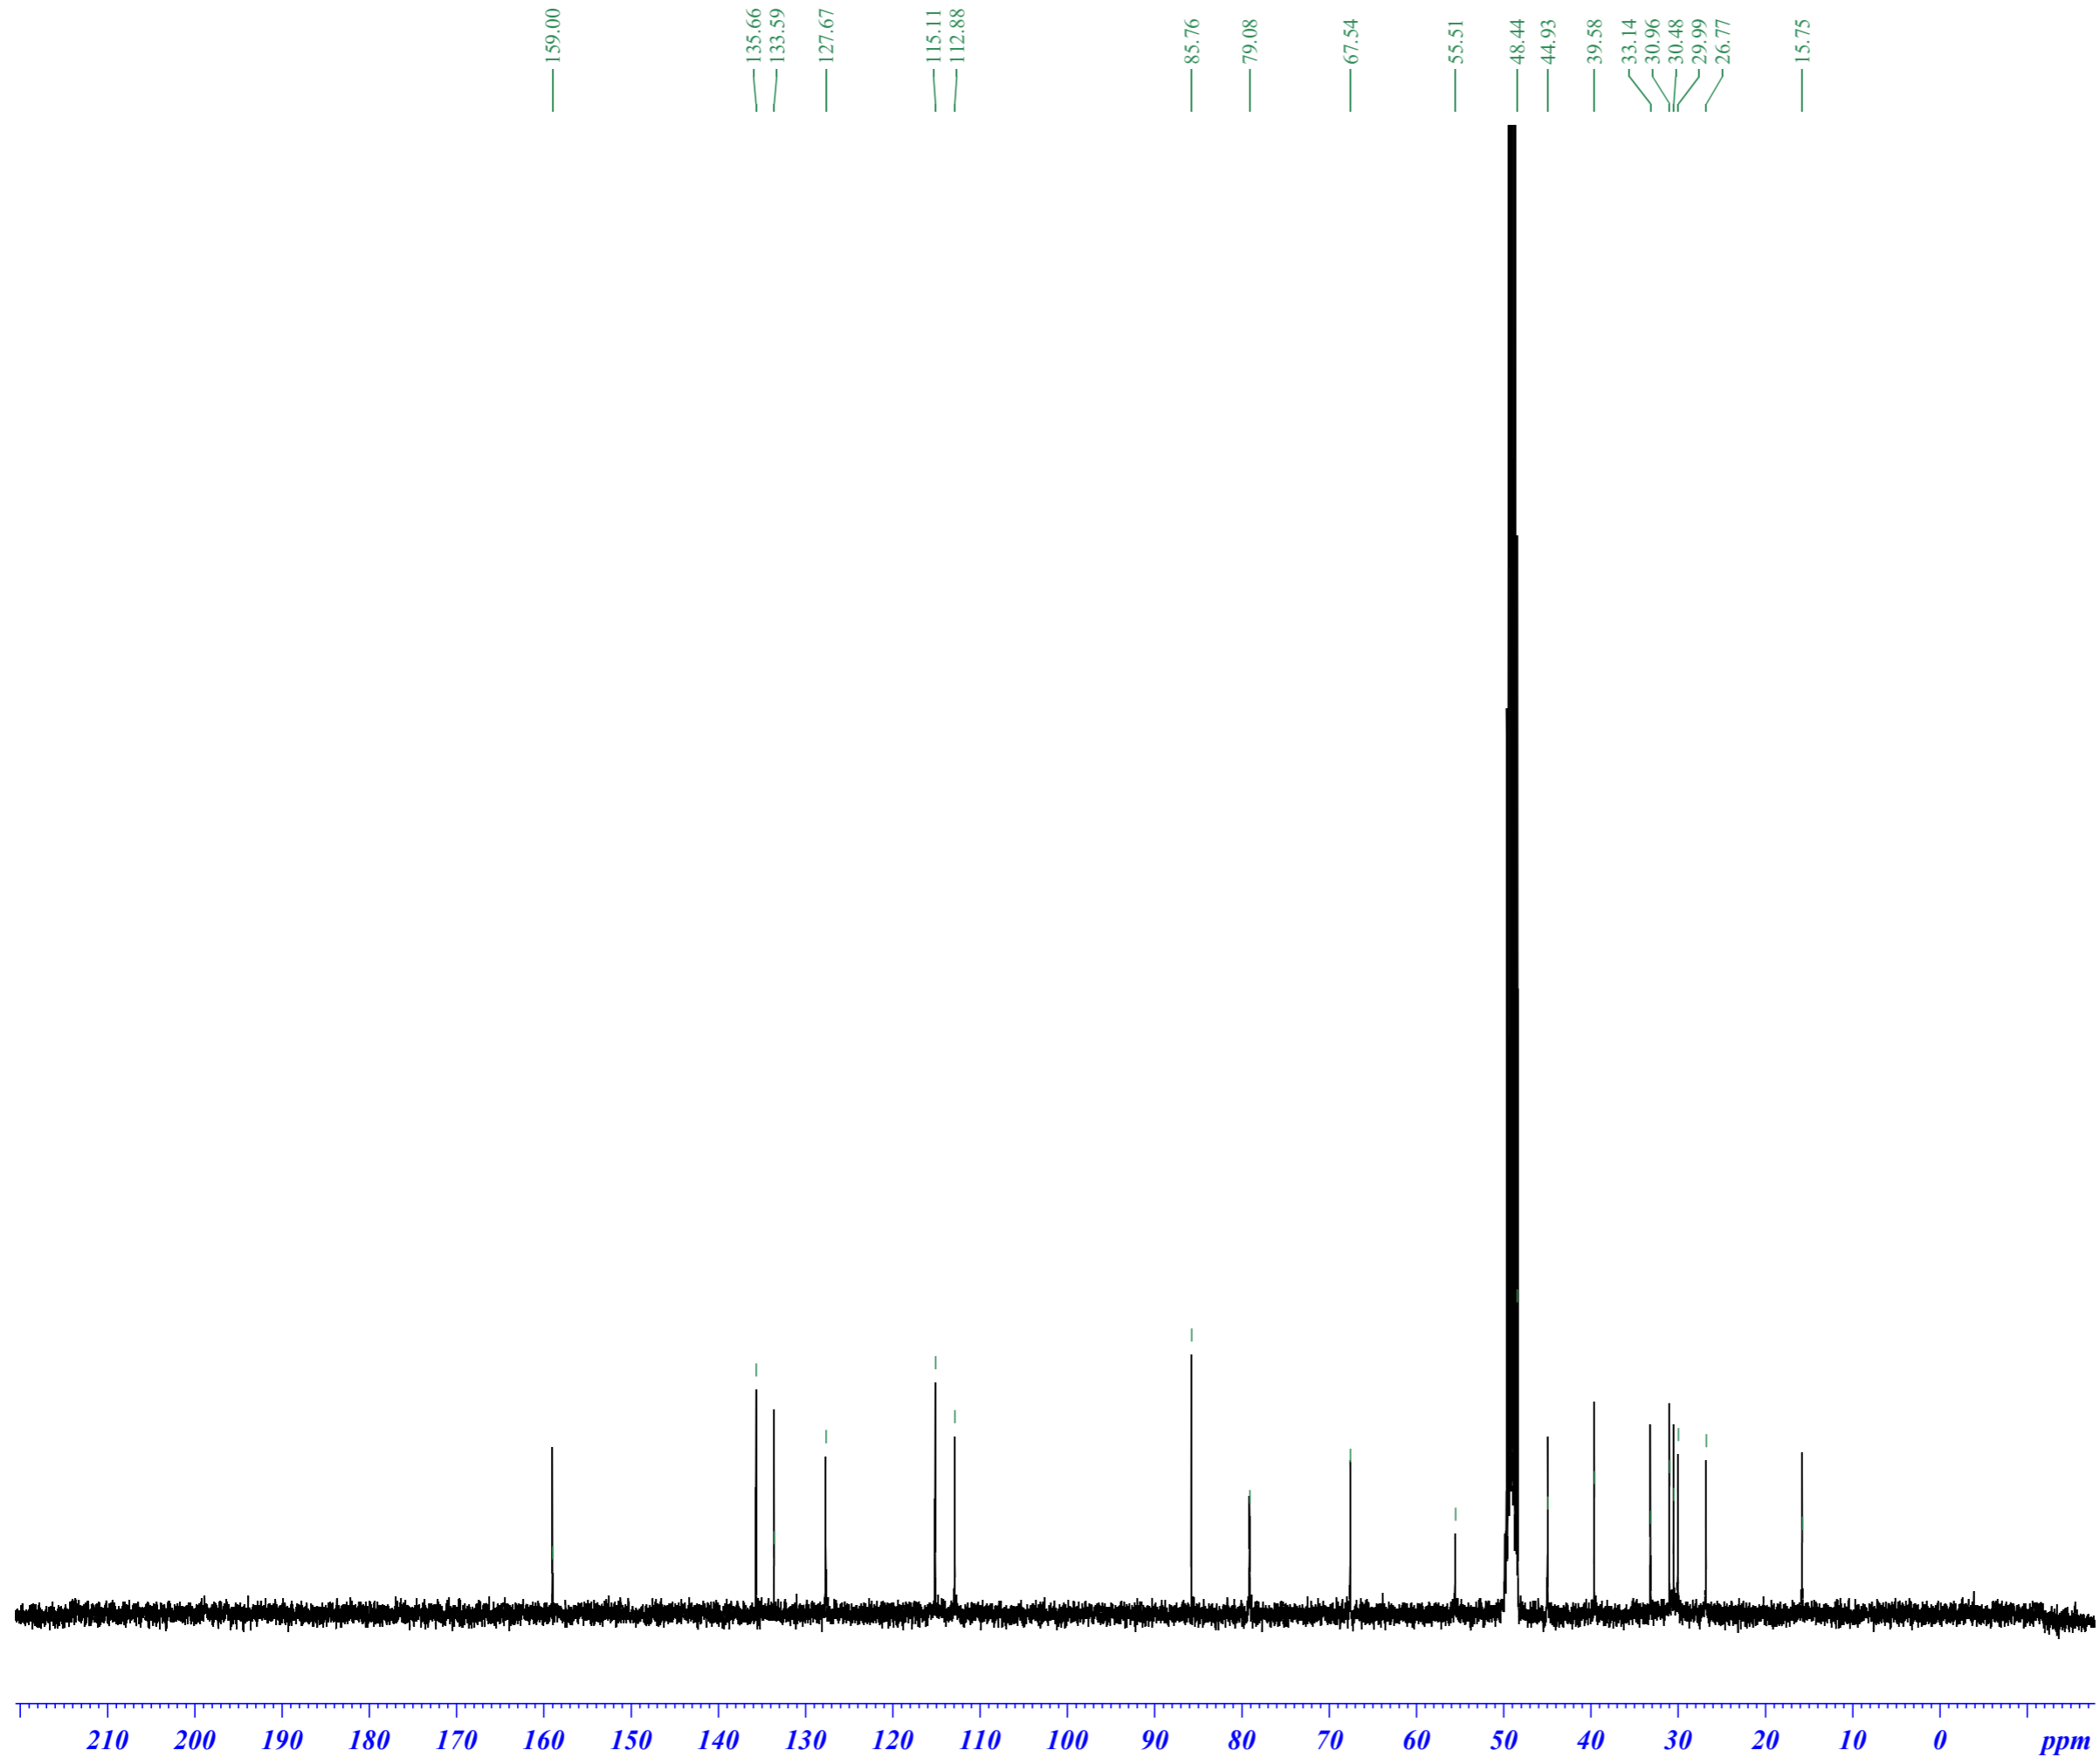

Current Data Parameters  
 NAME kawaiB400  
 EXPNO 347  
 PROCNO 1

F2 - Acquisition Parameters  
 Date\_ 20201228  
 Time 13.15  
 INSTRUM spect  
 PROBHD 5 mm QNP 1H/13  
 PULPROG zgpg30  
 TD 65536  
 SOLVENT MeOD  
 NS 1200  
 DS 4  
 SWH 23980.814 Hz  
 FIDRES 0.365918 Hz  
 AQ 1.3664256 sec  
 RG 1625.5  
 DW 20.850 usec  
 DE 6.50 usec  
 TE 296.2 K  
 D1 1.20000005 sec  
 D11 0.03000000 sec  
 TD0 1

==== CHANNEL f1 =====  
 NUC1 13C  
 P1 12.00 usec  
 PL1 7.50 dB  
 SFO1 100.6228298 MHz

==== CHANNEL f2 =====  
 CPDPRG[2] waltz16  
 NUC2 1H  
 PCPD2 90.00 usec  
 PL2 10.30 dB  
 PL12 20.00 dB  
 PL13 20.00 dB  
 SFO2 400.1316005 MHz

F2 - Processing parameters  
 SI 32768  
 SF 100.6126284 MHz  
 WDW EM  
 SSB 0  
 LB 1.00 Hz  
 GB 0  
 PC 1.40

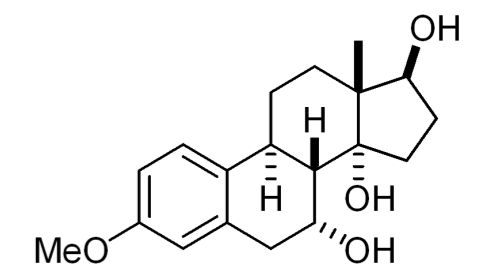

1b

<sup>13</sup>C NMR (100 MHz, CD<sub>3</sub>OD)

2121 21 01 08

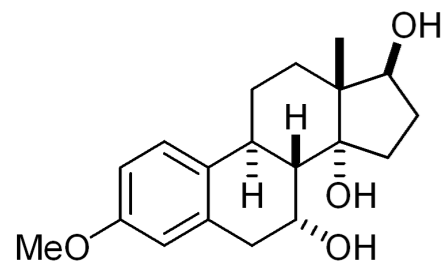

1b

COSY (CD<sub>3</sub>OD)

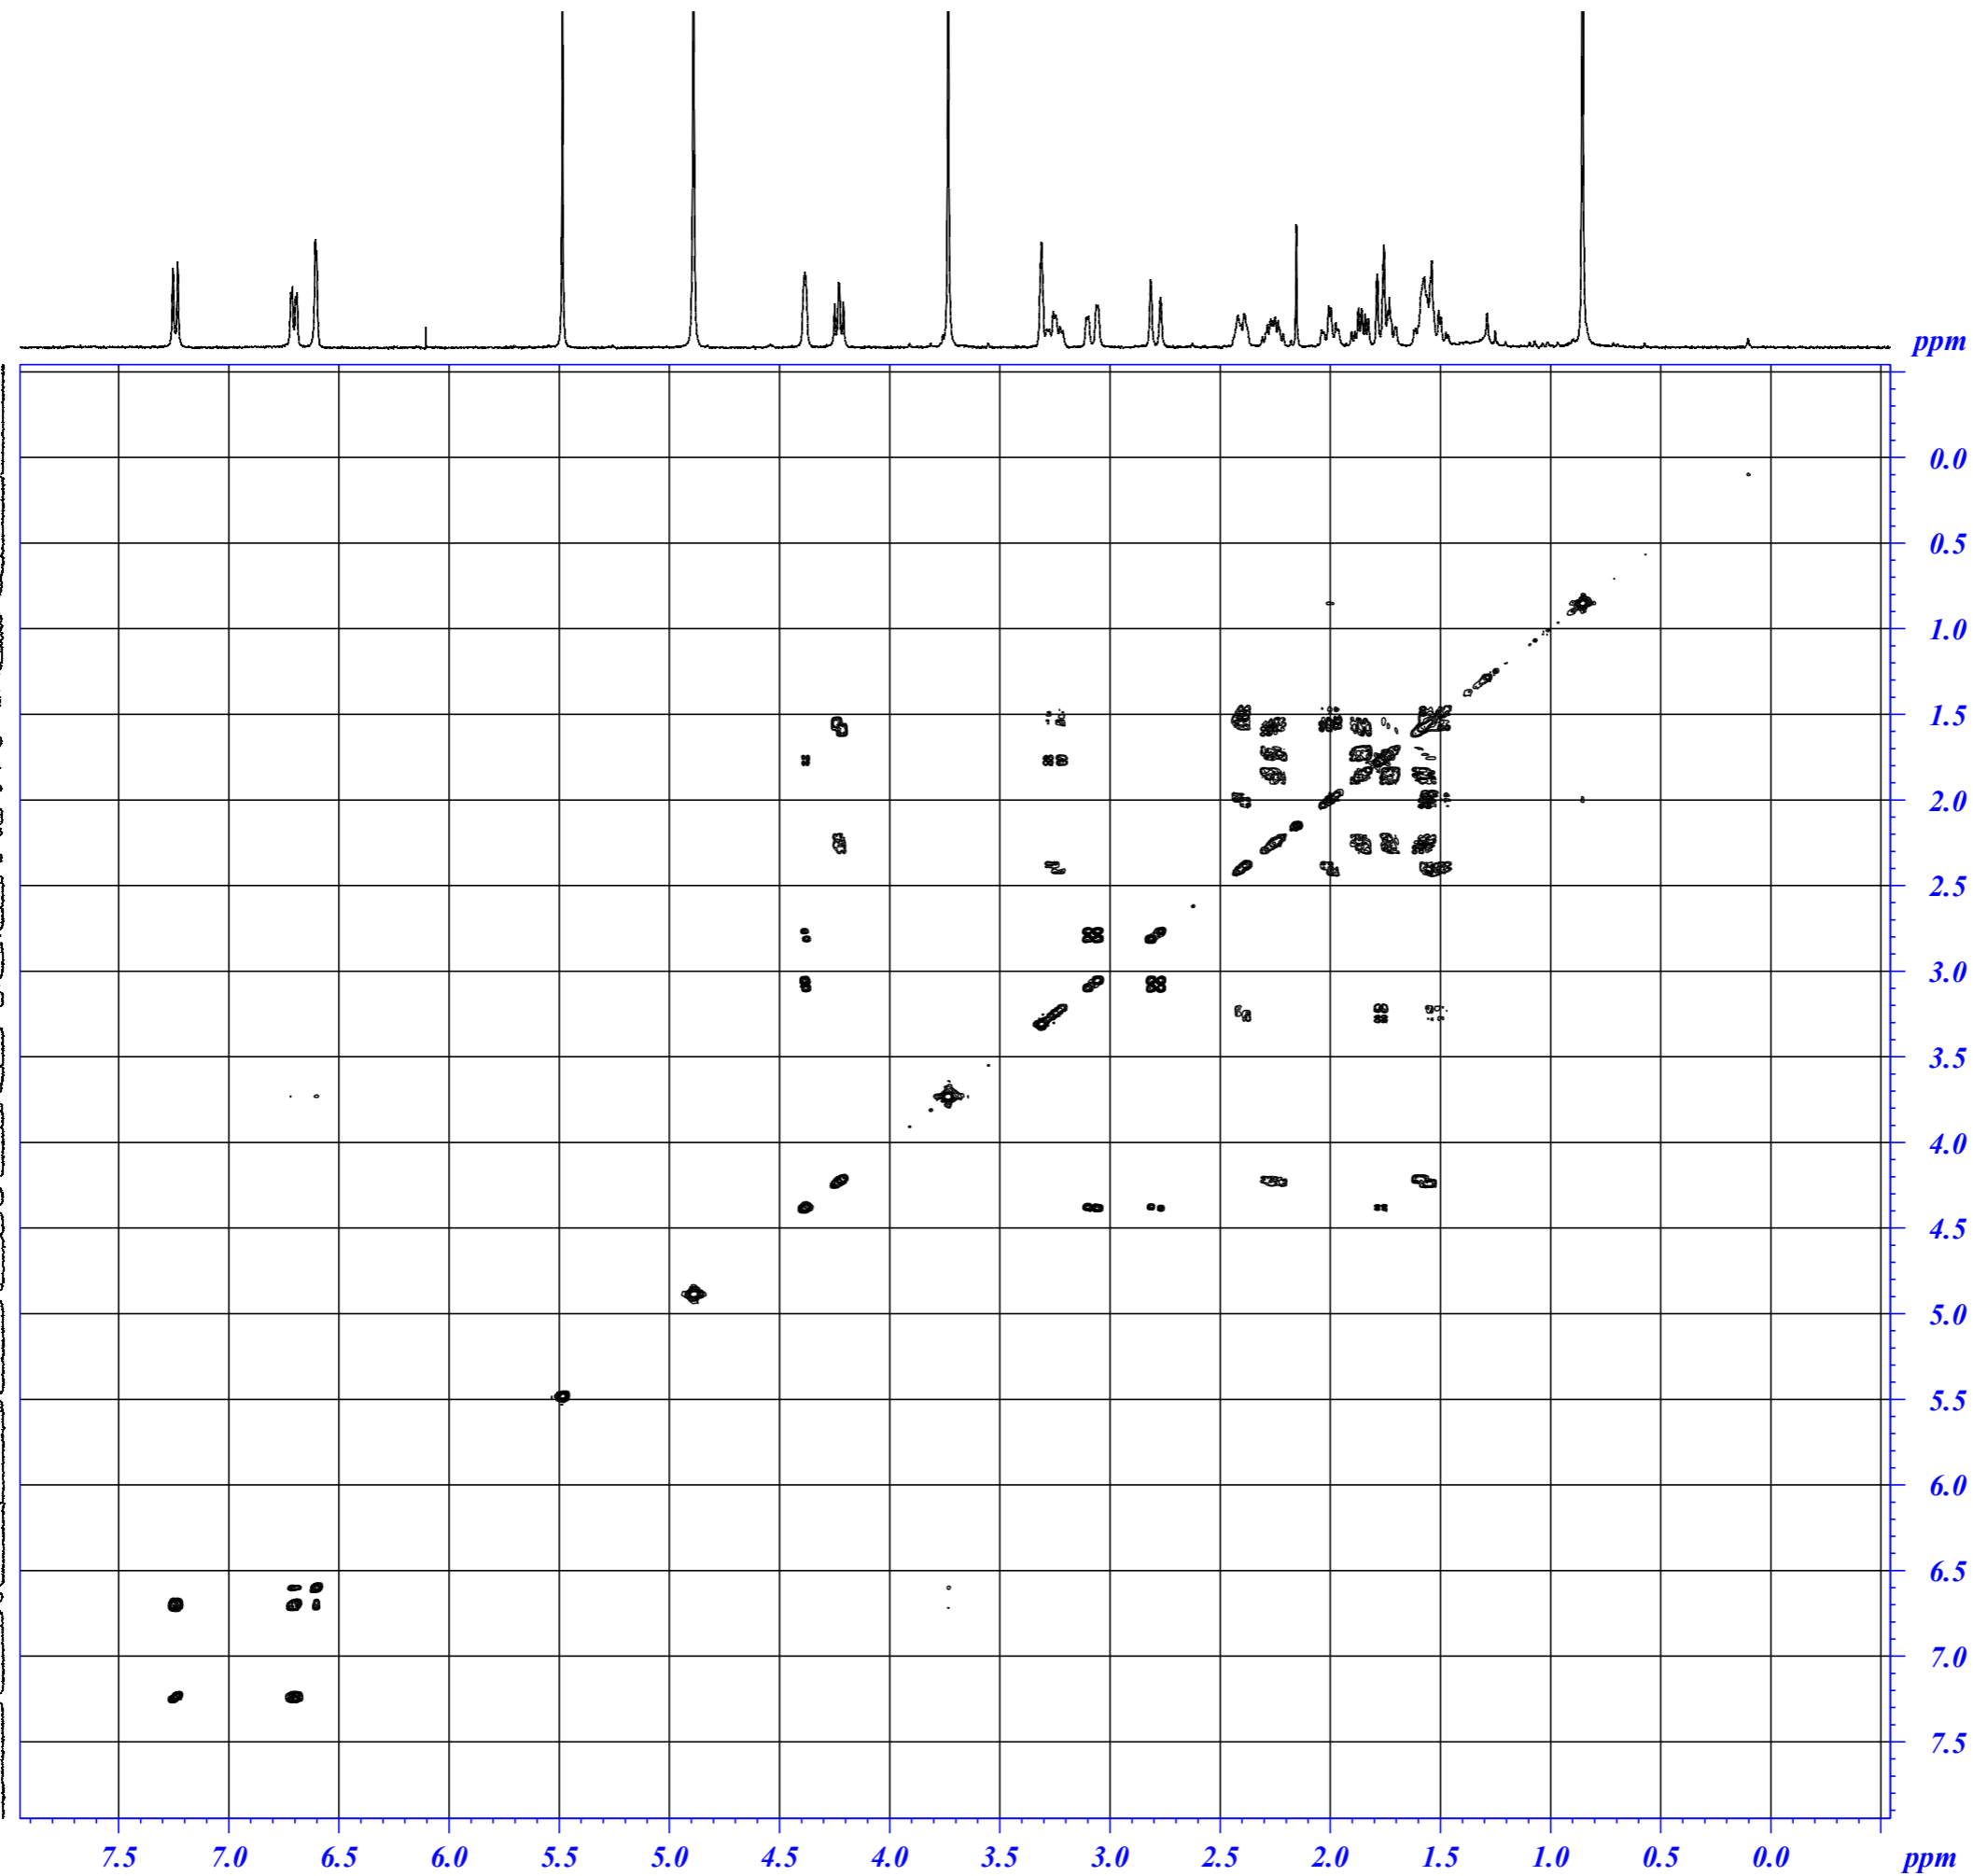

Current Data Parameters

NAME kawaiB400  
EXPNO 360  
PROCNO 1

F2 - Acquisition Parameters

Date\_ 20210108  
Time 13.02  
INSTRUM spect  
PROBHD 5 mm QNP 1H/13  
PULPROG cosygpqf  
TD 2048  
SOLVENT MeOD  
NS 1  
DS 2  
SWH 3396.739 Hz  
FIDRES 1.658564 Hz  
AQ 0.3014656 sec  
RG 9195.2  
DW 147.200 usec  
DE 6.50 usec  
TE 294.2 K  
D0 0.00000300 sec  
D1 1.48689198 sec  
D13 0.00000400 sec  
D16 0.00020000 sec  
IN0 0.00029440 sec

==== CHANNEL f1 =====

NUC1 1H  
P0 15.00 usec  
P1 15.00 usec  
PL1 10.30 dB  
SFO1 400.1314890 MHz

==== GRADIENT CHANNEL =====

GPNAME[1] SINE.100  
GPZ1 10.00 %  
P16 1000.00 usec

F1 - Acquisition parameters

TD 256  
SFO1 400.1315 MHz  
FIDRES 26.537004 Hz  
SW 8.489 ppm  
FnMODE QF

F2 - Processing parameters

SI 1024  
SF 400.1300078 MHz  
WDW SINE  
SSB 0  
LB 0 Hz  
GB 0  
PC 1.40

F1 - Processing parameters

SI 1024  
MC2 QF  
SF 400.1300077 MHz  
WDW SINE  
SSB 0  
LB 0 Hz  
GB 0
